# Supplementary material for: Sex-Specific Causal Relations between Steroid Hormones and Obesity—A Mendelian Randomization Study
Source: MDPI journal article supplement (doi:10.3390/metabo11110738), 2021-10-28
Supplement: s1 [file s1]

# Sex-specific causal relations between steroid hormones and obesity – a Mendelian Randomization Study

Pott et al.

Supplemental Data – Detailed findings of GWAMA

## 2.1.1. Progesterone (P4)

For P4, we detected seven loci associated with genome-wide significance, of which three were novel associations. These loci were at cytobands 1q32.2, 7q36.3, and 16p13.3. At 1q32.2 and 16p13.3 there were female-specific effects (no effect in males, interaction after hierarchical FDR correction  $q_{IA} = 4.97 \times 10^{-6}$  for 1q32.2, and  $q_{IA} = 3.13 \times 10^{-6}$  for 16p13.3). The association at 7q36.3 was sex-related: the lowest p-value was observed in the combined setting, but the effect in females differed significantly from that in men ( $\beta_{males} = -0.226$ ,  $p_{males} = 1.14 \times 10^{-4}$ ;  $\beta_{females} = -0.559$ ,  $p_{females} = 1.45 \times 10^{-5}$ ;  $q_{IA} = 0.0187$ ). Plausible candidate genes are: *CD55* at 1q32.2 (cis-eQTL), whose gene expression is up-regulated by progesterone in mice [1]; *VIPR2* at 7q36.3 (intron modifier), coding for a receptor of the pituitary adenylate cyclase-activating polypeptide which is controlling the hormone release for ovulation [2]; and *RBFOX1* at 16p13.3 (intron modifier), which is androgen-responsive [3].

We also tested the known loci for sex-interaction and replicated the female-specific effects at *KCNH1* (1q32.2), *ARNTL* (11p15.2), and *HSD17B12* (11p11.2). In addition, we observed a novel interaction for *CYP17A1* (10q24.32), which was male-specific. Hence, all seven observed P4 associations had significant sex-interactions: five female-specific, one male-specific, and one sex-related with stronger effect in females.

## 2.1.2. 17-hydroxy-progesterone (17-OHP)

We found four genome-wide significant loci for 17-OHP, one known (MHC region at chromosome 6), and three novel hits at 1p12, 2p15, and 18q22.3. The first novel locus at 1p12 was male-specific ( $\beta_{males} = 0.112$ ,  $p_{males} = 1.03 \times 10^{-10}$ ;  $\beta_{females} = -0.016$ ,  $p_{females} = 0.571$ ;  $q_{IA} = 5.14 \times 10^{-4}$ ) and was located near *HSD3B1*, coding for the enzyme transforming 17-OH-pregnenolone to 17-OHP. In a previous work, we only detected this locus with suggestive significance [4]. The other two loci were at 2p15 and 18q22.3, with candidate genes *REL* and *CYB5A*, respectively. *Rel* and P4 are part of a DNA loop, which enhances gene expression [5], while *Cyb5* has a redox effector role for *Cyp17A1* [6], another enzyme of the steroid biosynthesis pathway catalyzing the reaction of P4 to 17-OHP. The effect at 2p15 was sex-unspecific, while the other was male-specific ( $q_{IA} = 7.81 \times 10^{-2}$  at 2p15;  $q_{IA} = 8.21 \times 10^{-7}$  at 18q22.3). The known hit at MHC was sex-unspecific ( $q_{IA} = 0.722$ ).

## 2.1.3. Androstenedione (A4)

There was only one novel locus for A4 at cytoband 10q26.3, which was male-specific ( $q_{IA} = 7.06 \times 10^{-4}$ ). The most likely candidate gene was *MGMT* (intron modifier). Its genetically regulated gene expression was associated with A4 in all tissues (using MetaXcan and GTex data). P4 has been reported to suppress *MGMT* expression in WHO grade IV human glioblastoma multiforme cell lines [7]. The androgen and progesterone receptor are closely related, and P4 in high dosages can block the androgen receptor [8,9]. This might explain the observed A4 association, but the exact mechanisms behind this are still unclear. In addition, we replicated *CYP11B2* at 8q24.3 [4]. There was no sex-interaction observed for this locus ( $q_{IA} = 0.573$ ).

## 2.1.4. Aldosterone (Aldo)

For the first time, we were able to detect genome-wide significant hits for aldosterone, one female- and one male-specific locus. The female-specific locus was at 1q23.3 within *HSD17B7*, coding for another enzyme of the steroid pathway ( $q_{IA} = 9.62 \times 10^{-6}$ ). The male-specific hit is within a gene desert, but a trans-eQTL of *CNST*, suggesting a connection to connexins, which play a role in the renin-angiotensin-aldosterone system [13] ( $q_{IA} = 0.0281$ ).

### 2.1.5. Testosterone to estradiol ratio (T/E2)

We detected two loci associated with the ratio of T to E2. Several independent SNPs (pairwise LD  $r^2 < 0.1$ ) were associated at 15q21.2 with candidate gene *CYP19A1*, which has been described previously for E2 [4], T [11], sex hormone-binding globulin levels [11], and WHR [14]. While this locus showed no sex-specific effect for E2 alone [4], we detected a weak male-specific effect for the T/E2 ratio. However, this interaction did not withstand multiple testing correction ( $p_{IA} = 0.0272$ ;  $q_{IA} = 0.054$ ). The second associated locus was at 6q26 near *PARK2*. It has been reported that T and E2 prevent lymphocytes with a homozygote missense mutation in *PARK2* from oxidative stressors-evoked apoptosis in juvenile Parkinson patients [15]. Here, no sex-interaction was observed ( $p_{IA} = 0.707$ ).

## References

1. Zhang, Y.; Jin, S. Mitigating placental injuries through up-regulating DAF in experimental APS mice: new mechanism of progesterone. *Clin. Exp. Immunol.* **2019**, *197*, 376–386, doi:10.1111/cei.13313.
2. Apostolakis, E.M.; Riherd, D.N.; O'Malley, B.W. PAC1 receptors mediate pituitary adenylate cyclase-activating polypeptide- and progesterone-facilitated receptivity in female rats. *Mol. Endocrinol.* **2005**, *19*, 2798–2811, doi:10.1210/me.2004-0387.
3. Lieberman, A.P.; Friedlich, D.L.; Harmison, G.; Howell, B.W.; Jordan, C.L.; Breedlove, S.M.; Fischbeck, K.H. Androgens regulate the mammalian homologues of invertebrate sex determination genes *tra-2* and *fox-1*. *Biochem. Biophys. Res. Commun.* **2001**, *282*, 499–506, doi:10.1006/bbrc.2001.4617.
4. Pott, J.; Bae, Y.J.; Horn, K.; Teren, A.; Kühnapfel, A.; Kirsten, H.; Ceglarek, U.; Loeffler, M.; Thiery, J.; Kratzsch, J.; et al. Genetic Association Study of Eight Steroid Hormones and Implications for Sexual Dimorphism of Coronary Artery Disease. *J. Clin. Endocrinol. Metab.* **2019**, *104*, 5008–5023, doi:10.1210/jc.2019-00757.
5. Hewetson, A.; Chilton, B.S. Progesterone-dependent deoxyribonucleic acid looping between RUSH/SMARCA3 and Egr-1 mediates repression by c-Rel. *Mol. Endocrinol.* **2008**, *22*, 813–822, doi:10.1210/me.2007-0432.
6. Yadav, R.; Petrunak, E.M.; Estrada, D.F.; Scott, E.E. Structural insights into the function of steroidogenic cytochrome P450 17A1. *Mol. Cell. Endocrinol.* **2017**, *441*, 68–75, doi:10.1016/j.mce.2016.08.035.
7. Atif, F.; Patel, N.R.; Yousuf, S.; Stein, D.G. The Synergistic Effect of Combination Progesterone and Temozolomide on Human Glioblastoma Cells. *PLoS One* **2015**, *10*, e0131441, doi:10.1371/journal.pone.0131441.
8. Bardin, C.W.; Brown, T.; Isomaa, V.V.; Jänne, O.A. Progestins can mimic, inhibit and potentiate the actions of androgens. *Pharmacol. Ther.* **1983**, *23*, 443–459, doi:10.1016/0163-7258(83)90023-2.
9. Raudrant, D.; Rabe, T. Progestogens with antiandrogenic properties. *Drugs* **2003**, *63*, 463–492, doi:10.2165/00003495-200363050-00003.
10. Giri, A.; Hellwege, J.N.; Keaton, J.M.; Park, J.; Qiu, C.; Warren, H.R.; Torstenson, E.S.; Kovesdy, C.P.; Sun, Y.V.; Wilson, O.D.; et al. Trans-ethnic association study of blood pressure determinants in over 750,000 individuals. *Nat. Genet.* **2019**, *51*, 51–62, doi:10.1038/s41588-018-0303-9.
11. Ruth, K.S.; Day, F.R.; Tyrrell, J.; Thompson, D.J.; Wood, A.R.; Mahajan, A.; Beaumont, R.N.; Wittemans, L.; Martin, S.; Busch, A.S.; et al. Using human genetics to understand the disease impacts of testosterone in men and women. *Nat. Med.* **2020**, *26*, 252–258, doi:10.1038/s41591-020-0751-5.

12. Jeong, H.; Jin, H.-S.; Kim, S.-S.; Shin, D. Identifying Interactions between Dietary Sodium, Potassium, Sodium-Potassium Ratios, and FGF5 rs16998073 Variants and Their Associated Risk for Hypertension in Korean Adults. *Nutrients* **2020**, *12*, doi:10.3390/nu12072121.
13. Kurt, B.; Karger, C.; Wagner, C.; Kurtz, A. Control of renin secretion from kidneys with renin cell hyperplasia. *Am. J. Physiol. Renal Physiol.* **2014**, *306*, F327-32, doi:10.1152/ajprenal.00536.2013.
14. Pulit, S.L.; Stoneman, C.; Morris, A.P.; Wood, A.R.; Glastonbury, C.A.; Tyrrell, J.; Yengo, L.; Ferreira, T.; Marouli, E.; Ji, Y.; et al. Meta-analysis of genome-wide association studies for body fat distribution in 694 649 individuals of European ancestry. *Hum. Mol. Genet.* **2019**, *28*, 166–174, doi:10.1093/hmg/ddy327.
15. Del Jimenez Rio, M.; Moreno, S.; Garcia-Ospina, G.; Buritica, O.; Uribe, C.S.; Lopera, F.; Velez-Pardo, C. Autosomal recessive juvenile parkinsonism Cys212Tyr mutation in parkin renders lymphocytes susceptible to dopamine- and iron-mediated apoptosis. *Mov. Disord.* **2004**, *19*, 324–330, doi:10.1002/mds.10670.
