# Supplementary material for: Sex-Specific Causal Relations between Steroid Hormones and Obesity—A Mendelian Randomization Study
Source: Metabolites. 2021 Oct 28;11(11):738. doi: 10.3390/metabo11110738 (PMC8624973; doi:10.3390/metabo11110738)
Supplement: Supplementary file 1 [file metabolites-11-00738-s001.zip › SupplementalTables.xlsx]

## Sheet: Content
Supplemental Tables - SASHA
Pott et al.
Table	Title
S1	GWAMA results (p<1e-6)
S2	Nearby genes
S3	eQTL look-up
S4	GWAS catalog look-up
S5	Sex IA test of topSNPs
S6	HLA analysis results
S7	MR: bivariat SH-obestiy
S8	MR: HLA
S9	MR: CAD
S10	MR: mediation

## Sheet: S1
Table S1: Results and annotation of the genome-wide association meta-analysis. All SNPs with p<1e-6 are reported. Further summary statistics can be found and downloaded on the Leipzig Health Atlas.
SNP information										Locus information									top phenotype						P4 all (n=4097)				P4 males (n=2220)				P4 females (n=1877)				17-OHP combined (n=3549)				17-OHP males (n=2220)				17-OHP females (n=1329)				A4 combined (n=3549)
SNP	chromosome of SNP	position of SNP	Cytoband	EA	OA	info	is tagSNP	tagSNP	r2 SNP-tagSNP	nearest genes (functional relevance)	CADD	corelating GWAS	cis-eQTL genes	trans-eQTL genes	KEGG pathway	Reactome pathway	DOSE pathway	GO pathway	top phenotype	top log-p prim. statistic	explained variance SNP	topmaf	topeaf	topn	beta	se	logp	I2	beta	se	logp	I2	beta	se	logp	I2	beta	se	logp	I2	beta	se	logp	I2	beta	se	logp	I2	beta
rs145827824:32103749:C:G	6	32103749	6p21.32	G	C	0.990583	TRUE	rs145827824:32103749:C:G	1	FKBPL (5.7 kb); ATF6B (7.7 kb); PRRT1 (12 kb); PPT2 (17 kb); PPT2-EGFL8 (18 kb); TNXB (21 kb); EGFL8 (29 kb); AGPAT1 (32 kb); RNF5 (42 kb); AGER (45 kb); PBX2 (49 kb)	0.037	0.781 Bioavailable testosterone levels // 0.597 Aspartate aminotransferase levels in low alcohol consumption	- | ABCF1 | ABHD16A | AGER | AIF1 | APOM | ATF6B | ATP6V1G2 | BAG6 | BRD2 | C4A | C4B | C4B_2 | C6orf10 | C6orf25 | C6orf48 | CCHCR1 | CFB | CLIC1 | CSNK2B | CUTA | CYP21A2 | DDAH2 | DDR1 | DDX39B | DOM3Z | DXO | EHMT2 | FLOT1 | GPANK1 | GPSM3 | GTF2H4 | HCG22 | HCG23 | HCG27 | HCP5 | HLA-B | HLA-C | HLA-DOA | HLA-DOB | HLA-DPA1 | HLA-DQA1 | HLA-DQA2 | HLA-DQB1 | HLA-DQB1-AS1 | HLA-DQB2 | HLA-DRA…	ABP1 | CCDC69 | FLOT1 | HLA-E | HLA-F | HLA-H | HLA-V | IER3 | LIMS1 | LINC00243 | MDC1 | NHP2 | PPP1R11 | TRAV12-1 | VARS2 | ZNRD1	Systemic lupus erythematosus:HLA-DOB,HLA-DQA1,HLA-DQA2,HLA-DRA,HLA-DRB1,HLA-DRB5 | Antigen processing and presentation:HLA-C,HLA-DOB,HLA-DQA1,HLA-DQA2,HLA-DRA,HLA-DRB1,HLA-DRB5,HSPA1A,HSPA1B,HSPA1L,TAP2 | Allograft rejection:HLA-C,HLA-DOB,HLA-DQA1,HLA-DQA2,HLA-DRA,HLA-DRB1,HLA-DRB5 | Type I diabetes mellitus:HLA-C,HLA-DOB,HLA-DQA1,HLA-DQA2,HLA-DRA,HLA-DRB1,HLA-DRB5 | Graft-versus-host disease:HLA…	Translocation of ZAP-70 to Immunological synapse:HLA-DQA1,HLA-DQA2,HLA-DRA,HLA-DRB1,HLA-DRB5 | Interferon gamma signaling:HLA-C,HLA-DQA1,HLA-DQA2,HLA-DRA,HLA-DRB1,HLA-DRB5 | Generation of second messenger molecules:HLA-DQA1,HLA-DQA2,HLA-DRA,HLA-DRB1,HLA-DRB5 | Phosphorylation of CD3 and TCR zeta chains:HLA-DQA1,HLA-DQA2,HLA-DRA,HLA-DRB1,HLA-DRB5 | PD-1 signaling:HLA-DQA1,HLA-DQA2,HLA-DRA,HLA-DRB1…	Kawasaki disease:BAG6,HLA-C,HLA-DRB1,PRRC2A | lymphadenitis:BAG6,HLA-C,HLA-DRB1,PRRC2A | lymph node disease:BAG6,HLA-C,HLA-DRB1,PRRC2A | leprosy:HLA-DRB1 | Graves' disease:HLA-C,HLA-DQA1,HLA-DRB1,TAP2 | sarcoidosis:AGER,DDR1,HLA-DQA1,HLA-DRB1,HSPA1L | hypersensitivity reaction type IV disease:AGER,DDR1,HLA-DQA1,HLA-DRB1,HSPA1L | hepatitis:HLA-C,HLA-DQA1,HLA-DRB1,NCR3,PSMB9 | autoimmune disease of…	antigen processing and presentation of exogenous peptide antigen:HLA-C,HLA-DOB,HLA-DQA1,HLA-DQA2,HLA-DRA,HLA-DRB1,HLA-DRB5,PSMB8,PSMB9,TAP2 | antigen processing and presentation of exogenous antigen:HLA-C,HLA-DOB,HLA-DQA1,HLA-DQA2,HLA-DRA,HLA-DRB1,HLA-DRB5,PSMB8,PSMB9,TAP2 | antigen processing and presentation of peptide antigen:HLA-C,HLA-DOB,HLA-DQA1,HLA-DQA2,HLA-DRA,HLA-DRB1,HLA-DRB5,PSMB8,PSMB…	OHP17_all	25.8526	0.0310829	0.0130393	0.0130393	3549	0.14826	0.0622462	1.76379	0	0.211972	0.0510759	4.47851	0	0.0553182	0.113735	0.202942	0.162892	0.603848	0.0565923	25.8526	0.571943	0.520316	0.0624442	16.1015	0	0.728019	0.107778	10.8457	0	0.131465
rs182129909:32006762:G:C	6	32006762	6p21.33	C	G	0.935008	FALSE	rs145827824:32103749:C:G	0.780923	CYP21A2 (0 kb, nc-exon/Non coding transcript exon/MODIFIER | intron/NMD transcript/MODIFIER | intron/Intron/MODIFIER | nc-RNA/Non coding transcript/MODIFIER | near_gene/Upstream gene/MODIFIER); TNXB (2.2 kb, near_gene/Downstream gene/MODIFIER); C4B-AS1 (2.7 kb, near_gene/Upstream gene/MODIFIER); C4B (3.6 kb, near_gene/Downstream gene/MODIFIER); STK19P (25 kb); TNXA (27 kb); CYP21A1P (31 kb); C4A-…	0.007	1 Bioavailable testosterone levels // 0.799 Aspartate aminotransferase levels in low alcohol consumption // 0.422 Neurological blood protein biomarker levels // 0.38 Heel bone mineral density // 0.319 Blood protein levels	- | ABCF1 | ABHD16A | AGER | AIF1 | APOM | ATF6B | ATP6V1G2 | ATP6V1G2-DDX39B | BAG6 | BAT4 | BRD2 | BTNL2 | C2 | C4A | C4B | C4B_2 | C6orf10 | C6orf25 | C6orf48 | CCHCR1 | CFB | CLIC1 | CSNK2B | CUTA | CYP21A2 | DDAH2 | DDR1 | DDX39B | DOM3Z | DXO | EHMT2 | FLOT1 | GPANK1 | GPSM3 | GTF2H4 | HCG22 | HCG23 | HCG27 | HCP5 | HLA-B | HLA-C | HLA-DOA | HLA-DOB | HLA-DPA1 | HLA-DQA1 | HLA-DQA2 | HLA-DQ…	ABP1 | BTN3A2 | CCDC69 | EXOC1 | FLOT1 | HLA-DRB1 | HLA-DRB4 | HLA-DRB5 | HLA-F | HLA-H | HLA-V | IER3 | LIMS1 | LINC00243 | MDC1 | NHP2 | PARP2 | PPP1R11 | PSMB9 | SSRP1 | TMEM154 | TRAV12-1 | TUBB | ZAP70 | ZNF672 | ZNRD1	Systemic lupus erythematosus:C4A,C4B,HLA-DOB,HLA-DQA1,HLA-DRA,HLA-DRB1 | Antigen processing and presentation:HLA-C,HLA-DOB,HLA-DQA1,HLA-DRA,HLA-DRB1,HLA-E,HSPA1A,HSPA1B,HSPA1L,TAP2 | Allograft rejection:HLA-C,HLA-DOB,HLA-DQA1,HLA-DRA,HLA-DRB1,HLA-E | Type I diabetes mellitus:HLA-C,HLA-DOB,HLA-DQA1,HLA-DRA,HLA-DRB1,HLA-E,LTA | Graft-versus-host disease:HLA-C,HLA-DOB,HLA-DQA1,HLA-DRA,HLA-DRB1,HLA-E…	Translocation of ZAP-70 to Immunological synapse:HLA-DQA1,HLA-DRA,HLA-DRB1 | Interferon gamma signaling:HLA-C,HLA-DQA1,HLA-DRA,HLA-DRB1,HLA-E | Generation of second messenger molecules:HLA-DQA1,HLA-DRA,HLA-DRB1 | Phosphorylation of CD3 and TCR zeta chains:HLA-DQA1,HLA-DRA,HLA-DRB1 | PD-1 signaling:HLA-DQA1,HLA-DRA,HLA-DRB1 | Interferon Signaling:HLA-C,HLA-DQA1,HLA-DRA,HLA-DRB1,HLA-E,PSMB8 | RNA P…	Kawasaki disease:BAG6,HLA-C,HLA-DRB1,HLA-E,PRRC2A | lymphadenitis:BAG6,HLA-C,HLA-DRB1,HLA-E,PRRC2A | lymph node disease:BAG6,HLA-C,HLA-DRB1,HLA-E,PRRC2A | leprosy:HLA-DRB1,LTA | Graves' disease:HLA-C,HLA-DQA1,HLA-DRB1,TAP2 | sarcoidosis:DDR1,HLA-DQA1,HLA-DRB1,HSPA1L,LTA | hypersensitivity reaction type IV disease:DDR1,HLA-DQA1,HLA-DRB1,HSPA1L,LTA | hepatitis:HLA-C,HLA-DQA1,HLA-DRB1,HLA-E,LTA,NCR3…	antigen processing and presentation of exogenous peptide antigen:HLA-C,HLA-DOB,HLA-DQA1,HLA-DRA,HLA-DRB1,HLA-E,PSMB8,TAP2 | antigen processing and presentation of exogenous antigen:HLA-C,HLA-DOB,HLA-DQA1,HLA-DRA,HLA-DRB1,HLA-E,PSMB8,TAP2 | antigen processing and presentation of peptide antigen:HLA-C,HLA-DOB,HLA-DQA1,HLA-DRA,HLA-DRB1,HLA-E,PSMB8,TAP2 | adaptive immune response:C4A,C4B,HLA-C,HLA-DO…	OHP17_all	25.4108	0.0305491	0.0128699	0.0128699	3549	0.149352	0.0644375	1.68907	0.581158	0.243378	0.0542064	5.14707	0	0.0529952	0.11524	0.19003	0.411788	0.619867	0.0586151	25.4108	0	0.595959	0.0661099	18.7045	0	0.643807	0.107651	8.65383	0	0.139556
rs150223621:32005272:G:A	6	32005272	6p21.33	A	G	0.932008	FALSE	rs145827824:32103749:C:G	0.727371	CYP21A2 (0.77 kb, near_gene/Upstream gene/MODIFIER); C4B-AS1 (1.2 kb, near_gene/Upstream gene/MODIFIER); C4B (2.1 kb, near_gene/Downstream gene/MODIFIER); TNXB (3.7 kb, near_gene/Downstream gene/MODIFIER); STK19P (24 kb); TNXA (25 kb); CYP21A1P (29 kb); C4A-AS1 (34 kb); C4A (35 kb); RNA5SP206 (41 kb)	0.089	0.931 Bioavailable testosterone levels // 0.744 Aspartate aminotransferase levels in low alcohol consumption // 0.417 Heel bone mineral density // 0.392 Neurological blood protein biomarker levels // 0.34 Blood protein levels	- | ABCF1 | ABHD16A | AGER | AIF1 | APOM | ATF6B | ATP6V1G2 | ATP6V1G2-DDX39B | BAG6 | BAT4 | BRD2 | BTNL2 | C2 | C4A | C4B | C4B_2 | C6orf10 | C6orf25 | C6orf48 | CCHCR1 | CFB | CLIC1 | CSNK2B | CUTA | CYP21A2 | DDAH2 | DDR1 | DDX39B | DOM3Z | DXO | EHMT2 | FLOT1 | GPANK1 | GPSM3 | GTF2H4 | HCG22 | HCG23 | HCG27 | HCP5 | HLA-B | HLA-C | HLA-DOA | HLA-DOB | HLA-DPA1 | HLA-DQA1 | HLA-DQA2 | HLA-DQ…	ABP1 | BTN3A2 | CCDC69 | EXOC1 | FLOT1 | HLA-DRB1 | HLA-DRB4 | HLA-DRB5 | HLA-F | HLA-H | HLA-V | IER3 | LIMS1 | LINC00243 | MDC1 | NHP2 | PARP2 | PPP1R11 | TMEM154 | TRAV12-1 | TUBB | ZNRD1	Systemic lupus erythematosus:C4A,C4B,HLA-DOB,HLA-DQA1,HLA-DRA,HLA-DRB1 | Antigen processing and presentation:HLA-C,HLA-DOB,HLA-DQA1,HLA-DRA,HLA-DRB1,HLA-E,HSPA1A,HSPA1B,HSPA1L,TAP2 | Allograft rejection:HLA-C,HLA-DOB,HLA-DQA1,HLA-DRA,HLA-DRB1,HLA-E | Type I diabetes mellitus:HLA-C,HLA-DOB,HLA-DQA1,HLA-DRA,HLA-DRB1,HLA-E,LTA | Graft-versus-host disease:HLA-C,HLA-DOB,HLA-DQA1,HLA-DRA,HLA-DRB1,HLA-E…	Translocation of ZAP-70 to Immunological synapse:HLA-DQA1,HLA-DRA,HLA-DRB1 | Interferon gamma signaling:HLA-C,HLA-DQA1,HLA-DRA,HLA-DRB1,HLA-E | Generation of second messenger molecules:HLA-DQA1,HLA-DRA,HLA-DRB1 | Phosphorylation of CD3 and TCR zeta chains:HLA-DQA1,HLA-DRA,HLA-DRB1 | PD-1 signaling:HLA-DQA1,HLA-DRA,HLA-DRB1 | Interferon Signaling:HLA-C,HLA-DQA1,HLA-DRA,HLA-DRB1,HLA-E,PSMB8 | RNA P…	Kawasaki disease:BAG6,HLA-C,HLA-DRB1,HLA-E,PRRC2A | lymphadenitis:BAG6,HLA-C,HLA-DRB1,HLA-E,PRRC2A | lymph node disease:BAG6,HLA-C,HLA-DRB1,HLA-E,PRRC2A | leprosy:HLA-DRB1,LTA | Graves' disease:HLA-C,HLA-DQA1,HLA-DRB1,TAP2 | sarcoidosis:DDR1,HLA-DQA1,HLA-DRB1,HSPA1L,LTA | hypersensitivity reaction type IV disease:DDR1,HLA-DQA1,HLA-DRB1,HSPA1L,LTA | hepatitis:HLA-C,HLA-DQA1,HLA-DRB1,HLA-E,LTA,NCR3…	antigen processing and presentation of exogenous peptide antigen:HLA-C,HLA-DOB,HLA-DQA1,HLA-DRA,HLA-DRB1,HLA-E,PSMB8,TAP2 | antigen processing and presentation of exogenous antigen:HLA-C,HLA-DOB,HLA-DQA1,HLA-DRA,HLA-DRB1,HLA-E,PSMB8,TAP2 | antigen processing and presentation of peptide antigen:HLA-C,HLA-DOB,HLA-DQA1,HLA-DRA,HLA-DRB1,HLA-E,PSMB8,TAP2 | adaptive immune response:C4A,C4B,HLA-C,HLA-DO…	OHP17_all	25.4044	0.0305413	0.0129279	0.0129279	3549	0.14954	0.064362	1.69559	0.578461	0.243692	0.0541588	5.16696	0	0.0528301	0.115066	0.189673	0.407524	0.619093	0.0585496	25.4044	0	0.596527	0.0660482	18.772	0	0.641047	0.107499	8.60798	0	0.139092
rs6899983:31758931:A:C	6	31758931	6p21.33	C	A	0.867109	FALSE	rs145827824:32103749:C:G	0.597443	VARS (0 kb, intron/Intron/MODIFIER | nc-RNA/Non coding transcript/MODIFIER | near_gene/Downstream gene/MODIFIER); LSM2 (6.2 kb); VWA7 (14 kb); HSPA1L (18 kb); HSPA1A (24 kb); SAPCD1-AS1 (26 kb); MSH5-SAPCD1 (26 kb); SAPCD1 (26 kb); MSH5 (26 kb); RNU6-850P (34 kb); HSPA1B (37 kb); C6orf48 (43 kb); SNORD48 (44 kb); SNORD52 (46 kb)	0.916	1 Aspartate aminotransferase levels in low alcohol consumption // 0.799 Bioavailable testosterone levels // 0.392 Neurological blood protein biomarker levels // 0.352 Heel bone mineral density	- | ABCF1 | ABHD16A | AIF1 | ATF6B | ATP6V1G2 | ATP6V1G2-DDX39B | BAG6 | BTNL2 | C2 | C4A | C4B | C4B_2 | C6orf10 | C6orf48 | CCHCR1 | CLIC1 | CSNK2B | DDAH2 | DDR1 | DDX39B | DOM3Z | DXO | EHMT2 | FLOT1 | GPANK1 | GPSM3 | GTF2H4 | HCG22 | HCG23 | HCG27 | HCG4B | HCG4P3 | HCP5 | HLA-A | HLA-B | HLA-C | HLA-DOA | HLA-DOB | HLA-DQA1 | HLA-DQA2 | HLA-DQB1 | HLA-DQB2 | HLA-DRA | HLA-DRB1 | HLA-DRB2 |…	ABP1 | BTN3A2 | CCDC69 | FLOT1 | HLA-DRB1 | HLA-DRB4 | HLA-DRB5 | HLA-F | HLA-H | HLA-V | IER3 | LIMS1 | NHP2 | TAP2 | TMEM154 | TRAV12-1 | ZNRD1	Systemic lupus erythematosus:HLA-DOB,HLA-DQA1,HLA-DRA,HLA-DRB1 | Antigen processing and presentation:HLA-C,HLA-DOB,HLA-DQA1,HLA-DRA,HLA-DRB1,HLA-E,HSPA1A,HSPA1B,HSPA1L,TAP2 | Allograft rejection:HLA-C,HLA-DOB,HLA-DQA1,HLA-DRA,HLA-DRB1,HLA-E | Type I diabetes mellitus:HLA-C,HLA-DOB,HLA-DQA1,HLA-DRA,HLA-DRB1,HLA-E,LTA | Graft-versus-host disease:HLA-C,HLA-DOB,HLA-DQA1,HLA-DRA,HLA-DRB1,HLA-E | Autoi…	Translocation of ZAP-70 to Immunological synapse:HLA-DQA1,HLA-DRA,HLA-DRB1 | Interferon gamma signaling:HLA-C,HLA-DQA1,HLA-DRA,HLA-DRB1,HLA-E | Generation of second messenger molecules:HLA-DQA1,HLA-DRA,HLA-DRB1 | Phosphorylation of CD3 and TCR zeta chains:HLA-DQA1,HLA-DRA,HLA-DRB1 | PD-1 signaling:HLA-DQA1,HLA-DRA,HLA-DRB1 | Interferon Signaling:HLA-C,HLA-DQA1,HLA-DRA,HLA-DRB1,HLA-E,PSMB8 | RNA P…	Kawasaki disease:BAG6,HLA-C,HLA-DRB1,HLA-E,PRRC2A | lymphadenitis:BAG6,HLA-C,HLA-DRB1,HLA-E,PRRC2A | lymph node disease:BAG6,HLA-C,HLA-DRB1,HLA-E,PRRC2A | leprosy:HLA-DRB1,LTA | Graves' disease:HLA-C,HLA-DQA1,HLA-DRB1,TAP2 | sarcoidosis:DDR1,HLA-DQA1,HLA-DRB1,HSPA1L,LTA | hypersensitivity reaction type IV disease:DDR1,HLA-DQA1,HLA-DRB1,HSPA1L,LTA | hepatitis:HLA-C,HLA-DQA1,HLA-DRB1,HLA-E,LTA,NCR3…	antigen processing and presentation of exogenous peptide antigen:HLA-C,HLA-DOB,HLA-DQA1,HLA-DRA,HLA-DRB1,HLA-E,PSMB8,TAP2 | antigen processing and presentation of exogenous antigen:HLA-C,HLA-DOB,HLA-DQA1,HLA-DRA,HLA-DRB1,HLA-E,PSMB8,TAP2 | antigen processing and presentation of peptide antigen:HLA-C,HLA-DOB,HLA-DQA1,HLA-DRA,HLA-DRB1,HLA-E,PSMB8,TAP2 | adaptive immune response:HLA-C,HLA-DOB,HLA-DQ…	OHP17_all	25.2402	0.0303427	0.0198188	0.0198188	3549	0.116063	0.0537634	1.5105	0	0.205759	0.0448054	5.35811	0	0.00810535	0.098115	0.0295783	0	0.520693	0.0494095	25.2402	0	0.50383	0.0548742	19.3717	0	0.532049	0.0929861	7.97843	0.0637043	0.105442
rs201145096:31977145:G:A	6	31977145	6p21.33	A	G	0.94826	FALSE	rs145827824:32103749:C:G	0.692767	TNXA (0 kb, nc-exon/Non coding transcript exon/MODIFIER | nc-RNA/Non coding transcript/MODIFIER); CYP21A1P (0.92 kb, near_gene/Downstream gene/MODIFIER); AL645922.1 (2.3 kb, near_gene/Upstream gene/MODIFIER); STK19P (3.9 kb, near_gene/Upstream gene/MODIFIER); C4B (5.4 kb); C4A-AS1 (5.8 kb); C4A (6.7 kb); C4B-AS1 (23 kb); STK19 (27 kb); CYP21A2 (29 kb); TNXB (32 kb); DXO (37 kb); SKIV2L (40 kb)		0.927 Bioavailable testosterone levels // 0.732 Aspartate aminotransferase levels in low alcohol consumption // 0.391 Neurological blood protein biomarker levels // 0.342 Heel bone mineral density	- | ABCF1 | ABHD16A | AGER | AIF1 | ATF6B | ATP6V1G2 | ATP6V1G2-DDX39B | BAG6 | BRD2 | BTNL2 | C2 | C4A | C4B | C4B_2 | C6orf10 | C6orf25 | C6orf48 | CCHCR1 | CFB | CLIC1 | CSNK2B | CYP21A2 | DDAH2 | DDR1 | DDX39B | DOM3Z | DXO | EHMT2 | FLOT1 | GPANK1 | GPSM3 | GTF2H4 | HCG22 | HCG23 | HCG27 | HCP5 | HLA-B | HLA-C | HLA-DOA | HLA-DOB | HLA-DQA1 | HLA-DQA2 | HLA-DQB1 | HLA-DQB1-AS1 | HLA-DQB2 | H…	ABP1 | BTN3A2 | CCDC69 | FLOT1 | HLA-DRB1 | HLA-DRB4 | HLA-DRB5 | HLA-F | HLA-H | HLA-V | IER3 | LIMS1 | LINC00243 | NHP2 | PPP1R11 | TMEM154 | TRAV12-1 | VARS2 | ZNRD1	Systemic lupus erythematosus:C4A,C4B,HLA-DOB,HLA-DQA1,HLA-DRA,HLA-DRB1 | Antigen processing and presentation:HLA-C,HLA-DOB,HLA-DQA1,HLA-DRA,HLA-DRB1,HLA-E,HSPA1A,HSPA1B,HSPA1L,TAP2 | Allograft rejection:HLA-C,HLA-DOB,HLA-DQA1,HLA-DRA,HLA-DRB1,HLA-E | Type I diabetes mellitus:HLA-C,HLA-DOB,HLA-DQA1,HLA-DRA,HLA-DRB1,HLA-E,LTA | Graft-versus-host disease:HLA-C,HLA-DOB,HLA-DQA1,HLA-DRA,HLA-DRB1,HLA-E…	Translocation of ZAP-70 to Immunological synapse:HLA-DQA1,HLA-DRA,HLA-DRB1 | Interferon gamma signaling:HLA-C,HLA-DQA1,HLA-DRA,HLA-DRB1,HLA-E | Generation of second messenger molecules:HLA-DQA1,HLA-DRA,HLA-DRB1 | Phosphorylation of CD3 and TCR zeta chains:HLA-DQA1,HLA-DRA,HLA-DRB1 | PD-1 signaling:HLA-DQA1,HLA-DRA,HLA-DRB1 | Interferon Signaling:HLA-C,HLA-DQA1,HLA-DRA,HLA-DRB1,HLA-E,PSMB8 | RNA P…	Kawasaki disease:BAG6,HLA-C,HLA-DRB1,HLA-E,PRRC2A | lymphadenitis:BAG6,HLA-C,HLA-DRB1,HLA-E,PRRC2A | lymph node disease:BAG6,HLA-C,HLA-DRB1,HLA-E,PRRC2A | leprosy:HLA-DRB1,LTA | Graves' disease:HLA-C,HLA-DQA1,HLA-DRB1,TAP2 | sarcoidosis:DDR1,HLA-DQA1,HLA-DRB1,HSPA1L,LTA | hypersensitivity reaction type IV disease:DDR1,HLA-DQA1,HLA-DRB1,HSPA1L,LTA | hepatitis:HLA-C,HLA-DQA1,HLA-DRB1,HLA-E,LTA,NCR3…	antigen processing and presentation of exogenous peptide antigen:HLA-C,HLA-DOB,HLA-DQA1,HLA-DRA,HLA-DRB1,HLA-E,PSMB8,PSMB9,TAP2 | antigen processing and presentation of exogenous antigen:HLA-C,HLA-DOB,HLA-DQA1,HLA-DRA,HLA-DRB1,HLA-E,PSMB8,PSMB9,TAP2 | antigen processing and presentation of peptide antigen:HLA-C,HLA-DOB,HLA-DQA1,HLA-DRA,HLA-DRB1,HLA-E,PSMB8,PSMB9,TAP2 | adaptive immune response:C4…	OHP17_all	25.2115	0.0303081	0.0140961	0.0140961	3549	0.149187	0.0618513	1.79958	0.467341	0.225454	0.0510067	5.00583	0	0.0715051	0.111336	0.283401	0.355227	0.584682	0.0555142	25.2115	0.183849	0.546396	0.0621123	17.8519	0	0.633172	0.103021	9.10153	0.313745	0.124059
6:31974785:C:T	6	31974785	6p21.33	T	C	0.948677	FALSE	rs145827824:32103749:C:G	0.780923	CYP21A1P (0 kb, intron/Splice region/LOW | intron/Intron/MODIFIER | nc-RNA/Non coding transcript/MODIFIER); AL645922.1 (0 kb, intron/Intron/MODIFIER); TNXA (1.6 kb, near_gene/Downstream gene/MODIFIER); C4A-AS1 (3.5 kb, near_gene/Upstream gene/MODIFIER); C4A (4.3 kb, near_gene/Downstream gene/MODIFIER); STK19P (6.3 kb); C4B (7.8 kb); STK19 (24 kb); C4B-AS1 (26 kb); CYP21A2 (31 kb); TNXB (34 kb); D…		1 Bioavailable testosterone levels // 0.799 Aspartate aminotransferase levels in low alcohol consumption // 0.422 Neurological blood protein biomarker levels // 0.38 Heel bone mineral density // 0.319 Blood protein levels	- | ABCF1 | ABHD16A | AGER | AIF1 | APOM | ATF6B | ATP6V1G2 | ATP6V1G2-DDX39B | BAG6 | BRD2 | BTNL2 | C2 | C4A | C4B | C4B_2 | C6orf10 | C6orf25 | C6orf48 | CCHCR1 | CFB | CLIC1 | CSNK2B | CYP21A2 | DDAH2 | DDR1 | DDX39B | DOM3Z | DXO | EHMT2 | FLOT1 | GPANK1 | GPSM3 | GTF2H4 | HCG22 | HCG23 | HCG27 | HCP5 | HLA-B | HLA-C | HLA-DOA | HLA-DOB | HLA-DQA1 | HLA-DQA2 | HLA-DQB1 | HLA-DQB1-AS1 | HLA-D…	ABP1 | BTN3A2 | CCDC69 | EXOC1 | FLOT1 | HLA-DRB1 | HLA-DRB4 | HLA-DRB5 | HLA-F | HLA-H | HLA-V | IER3 | LIMS1 | LINC00243 | NHP2 | PPP1R11 | PSMB9 | SSRP1 | TMEM154 | TRAV12-1 | VARS2 | ZAP70 | ZNF672 | ZNRD1	Systemic lupus erythematosus:C4A,C4B,HLA-DOB,HLA-DQA1,HLA-DRA,HLA-DRB1 | Antigen processing and presentation:HLA-C,HLA-DOB,HLA-DQA1,HLA-DRA,HLA-DRB1,HLA-E,HSPA1A,HSPA1B,HSPA1L,TAP2 | Allograft rejection:HLA-C,HLA-DOB,HLA-DQA1,HLA-DRA,HLA-DRB1,HLA-E | Type I diabetes mellitus:HLA-C,HLA-DOB,HLA-DQA1,HLA-DRA,HLA-DRB1,HLA-E,LTA | Graft-versus-host disease:HLA-C,HLA-DOB,HLA-DQA1,HLA-DRA,HLA-DRB1,HLA-E…	Translocation of ZAP-70 to Immunological synapse:HLA-DQA1,HLA-DRA,HLA-DRB1 | Interferon gamma signaling:HLA-C,HLA-DQA1,HLA-DRA,HLA-DRB1,HLA-E | Generation of second messenger molecules:HLA-DQA1,HLA-DRA,HLA-DRB1 | Phosphorylation of CD3 and TCR zeta chains:HLA-DQA1,HLA-DRA,HLA-DRB1 | PD-1 signaling:HLA-DQA1,HLA-DRA,HLA-DRB1 | Interferon Signaling:HLA-C,HLA-DQA1,HLA-DRA,HLA-DRB1,HLA-E,PSMB8 | RNA P…	Kawasaki disease:BAG6,HLA-C,HLA-DRB1,HLA-E,PRRC2A | lymphadenitis:BAG6,HLA-C,HLA-DRB1,HLA-E,PRRC2A | lymph node disease:BAG6,HLA-C,HLA-DRB1,HLA-E,PRRC2A | leprosy:HLA-DRB1,LTA | Graves' disease:HLA-C,HLA-DQA1,HLA-DRB1,TAP2 | sarcoidosis:DDR1,HLA-DQA1,HLA-DRB1,HSPA1L,LTA | hypersensitivity reaction type IV disease:DDR1,HLA-DQA1,HLA-DRB1,HSPA1L,LTA | hepatitis:HLA-C,HLA-DQA1,HLA-DRB1,HLA-E,LTA,NCR3…	antigen processing and presentation of exogenous peptide antigen:HLA-C,HLA-DOB,HLA-DQA1,HLA-DRA,HLA-DRB1,HLA-E,PSMB8,TAP2 | antigen processing and presentation of exogenous antigen:HLA-C,HLA-DOB,HLA-DQA1,HLA-DRA,HLA-DRB1,HLA-E,PSMB8,TAP2 | antigen processing and presentation of peptide antigen:HLA-C,HLA-DOB,HLA-DQA1,HLA-DRA,HLA-DRB1,HLA-E,PSMB8,TAP2 | adaptive immune response:C4A,C4B,HLA-C,HLA-DO…	OHP17_all	24.8753	0.0299014	0.014313	0.014313	3549	0.142133	0.061285	1.69072	0.512439	0.219084	0.0507353	4.80322	0	0.0664889	0.110178	0.262649	0.359334	0.57651	0.0551209	24.8753	0.0189841	0.544228	0.0618014	17.8874	0	0.616154	0.102011	8.81373	0.224967	0.121973
rs199943645:31974355:C:A	6	31974355	6p21.33	A	C	0.955008	FALSE	rs145827824:32103749:C:G	0.780923	CYP21A1P (0 kb, intron/Intron/MODIFIER | nc-RNA/Non coding transcript/MODIFIER); AL645922.1 (0 kb, intron/Intron/MODIFIER); TNXA (2 kb, near_gene/Downstream gene/MODIFIER); C4A-AS1 (3.1 kb, near_gene/Upstream gene/MODIFIER); C4A (3.9 kb, near_gene/Downstream gene/MODIFIER); STK19P (6.7 kb); C4B (8.2 kb); STK19 (24 kb); C4B-AS1 (26 kb); CYP21A2 (32 kb); DXO (34 kb); TNXB (35 kb); SKIV2L (37 kb); N…		1 Bioavailable testosterone levels // 0.799 Aspartate aminotransferase levels in low alcohol consumption // 0.422 Neurological blood protein biomarker levels // 0.38 Heel bone mineral density // 0.319 Blood protein levels	- | ABCF1 | ABHD16A | AGER | AIF1 | APOM | ATF6B | ATP6V1G2 | ATP6V1G2-DDX39B | BAG6 | BRD2 | BTNL2 | C2 | C4A | C4B | C4B_2 | C6orf10 | C6orf25 | C6orf48 | CCHCR1 | CFB | CLIC1 | CSNK2B | CYP21A2 | DDAH2 | DDR1 | DDX39B | DOM3Z | DXO | EHMT2 | FLOT1 | GPANK1 | GPSM3 | GTF2H4 | HCG22 | HCG23 | HCG27 | HCP5 | HLA-B | HLA-C | HLA-DOA | HLA-DOB | HLA-DQA1 | HLA-DQA2 | HLA-DQB1 | HLA-DQB1-AS1 | HLA-D…	ABP1 | BTN3A2 | CCDC69 | EXOC1 | FLOT1 | HLA-DRB1 | HLA-DRB4 | HLA-DRB5 | HLA-F | HLA-H | HLA-V | IER3 | LIMS1 | LINC00243 | NHP2 | PPP1R11 | PSMB9 | SSRP1 | TMEM154 | TRAV12-1 | VARS2 | ZAP70 | ZNF672 | ZNRD1	Systemic lupus erythematosus:C4A,C4B,HLA-DOB,HLA-DQA1,HLA-DRA,HLA-DRB1 | Antigen processing and presentation:HLA-C,HLA-DOB,HLA-DQA1,HLA-DRA,HLA-DRB1,HLA-E,HSPA1A,HSPA1B,HSPA1L,TAP2 | Allograft rejection:HLA-C,HLA-DOB,HLA-DQA1,HLA-DRA,HLA-DRB1,HLA-E | Type I diabetes mellitus:HLA-C,HLA-DOB,HLA-DQA1,HLA-DRA,HLA-DRB1,HLA-E,LTA | Graft-versus-host disease:HLA-C,HLA-DOB,HLA-DQA1,HLA-DRA,HLA-DRB1,HLA-E…	Translocation of ZAP-70 to Immunological synapse:HLA-DQA1,HLA-DRA,HLA-DRB1 | Interferon gamma signaling:HLA-C,HLA-DQA1,HLA-DRA,HLA-DRB1,HLA-E | Generation of second messenger molecules:HLA-DQA1,HLA-DRA,HLA-DRB1 | Phosphorylation of CD3 and TCR zeta chains:HLA-DQA1,HLA-DRA,HLA-DRB1 | PD-1 signaling:HLA-DQA1,HLA-DRA,HLA-DRB1 | Interferon Signaling:HLA-C,HLA-DQA1,HLA-DRA,HLA-DRB1,HLA-E,PSMB8 | RNA P…	Kawasaki disease:BAG6,HLA-C,HLA-DRB1,HLA-E,PRRC2A | lymphadenitis:BAG6,HLA-C,HLA-DRB1,HLA-E,PRRC2A | lymph node disease:BAG6,HLA-C,HLA-DRB1,HLA-E,PRRC2A | leprosy:HLA-DRB1,LTA | Graves' disease:HLA-C,HLA-DQA1,HLA-DRB1,TAP2 | sarcoidosis:DDR1,HLA-DQA1,HLA-DRB1,HSPA1L,LTA | hypersensitivity reaction type IV disease:DDR1,HLA-DQA1,HLA-DRB1,HSPA1L,LTA | hepatitis:HLA-C,HLA-DQA1,HLA-DRB1,HLA-E,LTA,NCR3…	antigen processing and presentation of exogenous peptide antigen:HLA-C,HLA-DOB,HLA-DQA1,HLA-DRA,HLA-DRB1,HLA-E,PSMB8,TAP2 | antigen processing and presentation of exogenous antigen:HLA-C,HLA-DOB,HLA-DQA1,HLA-DRA,HLA-DRB1,HLA-E,PSMB8,TAP2 | antigen processing and presentation of peptide antigen:HLA-C,HLA-DOB,HLA-DQA1,HLA-DRA,HLA-DRB1,HLA-E,PSMB8,TAP2 | adaptive immune response:C4A,C4B,HLA-C,HLA-DO…	OHP17_all	24.8424	0.0298615	0.0143255	0.0143255	3549	0.146273	0.0611987	1.77359	0.477778	0.223608	0.0506488	4.99537	0	0.06702	0.109871	0.266105	0.367119	0.574454	0.0549621	24.8424	0.094121	0.542896	0.0616822	17.8697	0	0.612942	0.101569	8.79943	0.23688	0.122816
rs138134716:31697808:G:GC	6	31697808	6p21.33	GC	G	0.997417	FALSE	rs145827824:32103749:C:G	0.692767	DDAH2 (0 kb, intron/Intron/MODIFIER | nc-RNA/Non coding transcript/MODIFIER | near_gene/Upstream gene/MODIFIER); CLIC1 (0.55 kb, near_gene/Downstream gene/MODIFIER); C6orf25 (3.3 kb, near_gene/Downstream gene/MODIFIER); LY6G6C (8.2 kb); MSH5 (9.9 kb); MSH5-SAPCD1 (10 kb); LY6G6F (12 kb); LY6G6D (12 kb); LY6G6E (16 kb); ABHD16A (27 kb); RNU6-850P (27 kb); MIR4646 (29 kb); SAPCD1 (33 kb); SAPCD1-AS…	0.327	0.927 Bioavailable testosterone levels // 0.863 Aspartate aminotransferase levels in low alcohol consumption // 0.458 Neurological blood protein biomarker levels // 0.411 Heel bone mineral density // 0.346 Blood protein levels	- | ABCF1 | ABHD16A | AGER | AIF1 | APOM | ATF6B | ATP6V1G2 | ATP6V1G2-DDX39B | BAG6 | BRD2 | BTNL2 | C2 | C4A | C4B | C4B_2 | C6orf10 | C6orf25 | C6orf48 | CCHCR1 | CFB | CLIC1 | CSNK2B | CUTA | DDAH2 | DDR1 | DDX39B | DHX16 | DOM3Z | DXO | EHMT2 | FLOT1 | GPANK1 | GPSM3 | GTF2H4 | HCG22 | HCG23 | HCG27 | HCG4B | HCG4P3 | HCP5 | HLA-A | HLA-B | HLA-C | HLA-DOA | HLA-DOB | HLA-DPA1 | HLA-DQA1 | H…	ABP1 | BTN3A2 | CCDC69 | EXOC1 | FLOT1 | HLA-DRB1 | HLA-DRB4 | HLA-DRB5 | HLA-F | HLA-H | HLA-V | IER3 | LIMS1 | MDC1 | NHP2 | PARP2 | PSMB9 | SSRP1 | TAP2 | TMEM154 | TRAV12-1 | ZAP70 | ZNF672 | ZNRD1	Systemic lupus erythematosus:HLA-DOB,HLA-DQA1,HLA-DRA,HLA-DRB1 | Antigen processing and presentation:HLA-C,HLA-DOB,HLA-DQA1,HLA-DRA,HLA-DRB1,HLA-E,HSPA1A,HSPA1B,HSPA1L,TAP2 | Allograft rejection:HLA-C,HLA-DOB,HLA-DQA1,HLA-DRA,HLA-DRB1,HLA-E | Type I diabetes mellitus:HLA-C,HLA-DOB,HLA-DQA1,HLA-DRA,HLA-DRB1,HLA-E,LTA | Graft-versus-host disease:HLA-C,HLA-DOB,HLA-DQA1,HLA-DRA,HLA-DRB1,HLA-E | Autoi…	Translocation of ZAP-70 to Immunological synapse:HLA-DQA1,HLA-DRA,HLA-DRB1 | Interferon gamma signaling:HLA-C,HLA-DQA1,HLA-DRA,HLA-DRB1,HLA-E | Generation of second messenger molecules:HLA-DQA1,HLA-DRA,HLA-DRB1 | Phosphorylation of CD3 and TCR zeta chains:HLA-DQA1,HLA-DRA,HLA-DRB1 | PD-1 signaling:HLA-DQA1,HLA-DRA,HLA-DRB1 | Interferon Signaling:HLA-C,HLA-DQA1,HLA-DRA,HLA-DRB1,HLA-E,PSMB8 | RNA P…	Kawasaki disease:ABHD16A,BAG6,HLA-C,HLA-DRB1,HLA-E,PRRC2A | lymphadenitis:ABHD16A,BAG6,HLA-C,HLA-DRB1,HLA-E,PRRC2A | lymph node disease:ABHD16A,BAG6,HLA-C,HLA-DRB1,HLA-E,PRRC2A | leprosy:HLA-DRB1,LTA | Graves' disease:HLA-C,HLA-DQA1,HLA-DRB1,TAP2 | sarcoidosis:DDR1,HLA-DQA1,HLA-DRB1,HSPA1L,LTA | hypersensitivity reaction type IV disease:DDR1,HLA-DQA1,HLA-DRB1,HSPA1L,LTA | hepatitis:HLA-C,HLA-DQA1…	antigen processing and presentation of exogenous peptide antigen:HLA-C,HLA-DOB,HLA-DQA1,HLA-DRA,HLA-DRB1,HLA-E,PSMB8,TAP2 | antigen processing and presentation of exogenous antigen:HLA-C,HLA-DOB,HLA-DQA1,HLA-DRA,HLA-DRB1,HLA-E,PSMB8,TAP2 | antigen processing and presentation of peptide antigen:HLA-C,HLA-DOB,HLA-DQA1,HLA-DRA,HLA-DRB1,HLA-E,PSMB8,TAP2 | adaptive immune response:HLA-C,HLA-DOB,HLA-DQ…	OHP17_all	24.3519	0.0292675	0.0161882	0.0161882	3549	0.147403	0.056499	2.0418	0.482905	0.196206	0.0464654	4.61714	0	0.101055	0.103832	0.480924	0.177418	0.525578	0.0508091	24.3519	0	0.50024	0.056873	17.8474	0	0.551259	0.0942993	8.29872	0	0.126676
rs116196017:31947804:A:G	6	31947804	6p21.33	G	A	0.981008	FALSE	rs145827824:32103749:C:G	0.780923	STK19 (0 kb, nc-exon/Non coding transcript exon/MODIFIER | intron/NMD transcript/MODIFIER | intron/Intron/MODIFIER | nc-RNA/Non coding transcript/MODIFIER | near_gene/Downstream gene/MODIFIER | near_gene/Upstream gene/MODIFIER); C4A (2 kb, near_gene/Upstream gene/MODIFIER); DXO (7.7 kb); SKIV2L (10 kb); C4A-AS1 (20 kb); NELFE (21 kb); MIR1236 (23 kb); CYP21A1P (26 kb); CFB (28 kb); TNXA (29 kb); …	0.137	1 Bioavailable testosterone levels // 0.799 Aspartate aminotransferase levels in low alcohol consumption // 0.422 Neurological blood protein biomarker levels // 0.38 Heel bone mineral density // 0.319 Blood protein levels	- | ABCF1 | ABHD16A | AGER | AIF1 | APOM | ATF6B | ATP6V1G2 | ATP6V1G2-DDX39B | BAG6 | BAT4 | BRD2 | BTNL2 | C2 | C4A | C4B | C4B_2 | C6orf10 | C6orf25 | C6orf48 | CCHCR1 | CFB | CLIC1 | CSNK2B | CUTA | CYP21A2 | DDAH2 | DDR1 | DDX39B | DOM3Z | DXO | EHMT2 | FLOT1 | GPANK1 | GPSM3 | GTF2H4 | HCG22 | HCG23 | HCG27 | HCP5 | HLA-B | HLA-C | HLA-DOA | HLA-DOB | HLA-DPA1 | HLA-DQA1 | HLA-DQA2 | HLA-DQ…	ABP1 | BTN3A2 | CCDC69 | EXOC1 | FLOT1 | HLA-DRB1 | HLA-DRB4 | HLA-DRB5 | HLA-F | HLA-H | HLA-V | IER3 | LIMS1 | LINC00243 | MDC1 | NHP2 | PARP2 | PPP1R11 | PSMB9 | SSRP1 | TMEM154 | TRAV12-1 | TUBB | ZAP70 | ZNF672 | ZNRD1	Systemic lupus erythematosus:C2,C4A,C4B,HLA-DOB,HLA-DQA1,HLA-DRA,HLA-DRB1 | Antigen processing and presentation:HLA-C,HLA-DOB,HLA-DQA1,HLA-DRA,HLA-DRB1,HLA-E,HSPA1A,HSPA1B,HSPA1L,TAP2 | Allograft rejection:HLA-C,HLA-DOB,HLA-DQA1,HLA-DRA,HLA-DRB1,HLA-E | Type I diabetes mellitus:HLA-C,HLA-DOB,HLA-DQA1,HLA-DRA,HLA-DRB1,HLA-E,LTA | Graft-versus-host disease:HLA-C,HLA-DOB,HLA-DQA1,HLA-DRA,HLA-DRB1,HL…	Translocation of ZAP-70 to Immunological synapse:HLA-DQA1,HLA-DRA,HLA-DRB1 | Interferon gamma signaling:HLA-C,HLA-DQA1,HLA-DRA,HLA-DRB1,HLA-E | Generation of second messenger molecules:HLA-DQA1,HLA-DRA,HLA-DRB1 | Phosphorylation of CD3 and TCR zeta chains:HLA-DQA1,HLA-DRA,HLA-DRB1 | PD-1 signaling:HLA-DQA1,HLA-DRA,HLA-DRB1 | Interferon Signaling:HLA-C,HLA-DQA1,HLA-DRA,HLA-DRB1,HLA-E,PSMB8 | RNA P…	Kawasaki disease:BAG6,HLA-C,HLA-DRB1,HLA-E,PRRC2A | lymphadenitis:BAG6,HLA-C,HLA-DRB1,HLA-E,PRRC2A | lymph node disease:BAG6,HLA-C,HLA-DRB1,HLA-E,PRRC2A | leprosy:HLA-DRB1,LTA | Graves' disease:HLA-C,HLA-DQA1,HLA-DRB1,TAP2 | sarcoidosis:DDR1,HLA-DQA1,HLA-DRB1,HSPA1L,LTA | hypersensitivity reaction type IV disease:DDR1,HLA-DQA1,HLA-DRB1,HSPA1L,LTA | hepatitis:HLA-C,HLA-DQA1,HLA-DRB1,HLA-E,LTA,NCR3…	antigen processing and presentation of exogenous peptide antigen:HLA-C,HLA-DOB,HLA-DQA1,HLA-DRA,HLA-DRB1,HLA-E,PSMB8,TAP2 | antigen processing and presentation of exogenous antigen:HLA-C,HLA-DOB,HLA-DQA1,HLA-DRA,HLA-DRB1,HLA-E,PSMB8,TAP2 | antigen processing and presentation of peptide antigen:HLA-C,HLA-DOB,HLA-DQA1,HLA-DRA,HLA-DRB1,HLA-E,PSMB8,TAP2 | adaptive immune response:C2,C4A,C4B,HLA-C,HLA…	OHP17_all	24.1146	0.0289798	0.0147606	0.0147606	3549	0.141105	0.0595138	1.751	0.440103	0.215476	0.0492104	4.92299	0	0.0627023	0.10703	0.253377	0.312838	0.550198	0.0534604	24.1146	0.165044	0.525291	0.059956	17.7143	0	0.577811	0.0988816	8.2929	0.359168	0.115232
rs139498574:31844419:G:A	6	31844419	6p21.33	A	G	0.987504	FALSE	rs145827824:32103749:C:G	0.692767	SLC44A4 (0 kb, intron/Intron/MODIFIER | nc-RNA/Non coding transcript/MODIFIER); EHMT2 (3.1 kb, near_gene/Downstream gene/MODIFIER); EHMT2-AS1 (7.1 kb); NEU1 (14 kb); C2 (21 kb); ZBTB12 (23 kb); C6orf48 (37 kb); SNORD52 (39 kb); SNORD48 (41 kb); HSPA1B (46 kb)	6.359	0.927 Bioavailable testosterone levels // 0.863 Aspartate aminotransferase levels in low alcohol consumption // 0.458 Neurological blood protein biomarker levels // 0.411 Heel bone mineral density // 0.346 Blood protein levels	- | ABCF1 | ABHD16A | AGER | AIF1 | APOM | ATF6B | ATP6V1G2 | ATP6V1G2-DDX39B | BAG6 | BRD2 | BTNL2 | C2 | C4A | C4B | C4B_2 | C6orf10 | C6orf25 | C6orf48 | CCHCR1 | CFB | CLIC1 | CSNK2B | CUTA | DDAH2 | DDR1 | DDX39B | DOM3Z | DXO | EHMT2 | FLOT1 | GPANK1 | GPSM3 | GTF2H4 | HCG22 | HCG23 | HCG27 | HCP5 | HLA-A | HLA-B | HLA-C | HLA-DOA | HLA-DOB | HLA-DPA1 | HLA-DQA1 | HLA-DQA2 | HLA-DQB1 | HLA-…	ABP1 | BTN3A2 | CCDC69 | EXOC1 | FLOT1 | HLA-DRB1 | HLA-DRB4 | HLA-DRB5 | HLA-F | HLA-H | HLA-V | IER3 | LIMS1 | MDC1 | NHP2 | PARP2 | PPP1R11 | PSMB9 | SSRP1 | TAP2 | TMEM154 | TRAV12-1 | ZAP70 | ZNF672 | ZNRD1	Systemic lupus erythematosus:C2,HLA-DOB,HLA-DQA1,HLA-DRA,HLA-DRB1 | Antigen processing and presentation:HLA-C,HLA-DOB,HLA-DQA1,HLA-DRA,HLA-DRB1,HLA-E,HSPA1A,HSPA1B,HSPA1L,TAP2 | Allograft rejection:HLA-C,HLA-DOB,HLA-DQA1,HLA-DRA,HLA-DRB1,HLA-E | Type I diabetes mellitus:HLA-C,HLA-DOB,HLA-DQA1,HLA-DRA,HLA-DRB1,HLA-E,LTA | Graft-versus-host disease:HLA-C,HLA-DOB,HLA-DQA1,HLA-DRA,HLA-DRB1,HLA-E | Au…	Translocation of ZAP-70 to Immunological synapse:HLA-DQA1,HLA-DRA,HLA-DRB1 | Interferon gamma signaling:HLA-C,HLA-DQA1,HLA-DRA,HLA-DRB1,HLA-E | Generation of second messenger molecules:HLA-DQA1,HLA-DRA,HLA-DRB1 | Phosphorylation of CD3 and TCR zeta chains:HLA-DQA1,HLA-DRA,HLA-DRB1 | PD-1 signaling:HLA-DQA1,HLA-DRA,HLA-DRB1 | Interferon Signaling:HLA-C,HLA-DQA1,HLA-DRA,HLA-DRB1,HLA-E,PSMB8 | ERCC6…	Kawasaki disease:ABHD16A,BAG6,HLA-C,HLA-DRB1,HLA-E,PRRC2A | lymphadenitis:ABHD16A,BAG6,HLA-C,HLA-DRB1,HLA-E,PRRC2A | lymph node disease:ABHD16A,BAG6,HLA-C,HLA-DRB1,HLA-E,PRRC2A | leprosy:HLA-DRB1,LTA | Graves' disease:HLA-C,HLA-DQA1,HLA-DRB1,TAP2 | sarcoidosis:DDR1,HLA-DQA1,HLA-DRB1,HSPA1L,LTA | hypersensitivity reaction type IV disease:DDR1,HLA-DQA1,HLA-DRB1,HSPA1L,LTA | hepatitis:HLA-C,HLA-DQA1…	antigen processing and presentation of exogenous peptide antigen:HLA-C,HLA-DOB,HLA-DQA1,HLA-DRA,HLA-DRB1,HLA-E,PSMB8,TAP2 | antigen processing and presentation of exogenous antigen:HLA-C,HLA-DOB,HLA-DQA1,HLA-DRA,HLA-DRB1,HLA-E,PSMB8,TAP2 | antigen processing and presentation of peptide antigen:HLA-C,HLA-DOB,HLA-DQA1,HLA-DRA,HLA-DRB1,HLA-E,PSMB8,TAP2 | adaptive immune response:C2,HLA-C,HLA-DOB,HLA…	OHP17_all	23.9087	0.0287303	0.0142427	0.0142427	3549	0.152225	0.0602669	1.93773	0.421424	0.218979	0.0498078	4.95854	0	0.0793074	0.109143	0.330269	0.352115	0.557354	0.0543974	23.9087	0	0.540288	0.0607595	18.2226	0	0.571938	0.101354	7.77799	0	0.107725
rs407283:31692970:G:A	6	31692970	6p21.33	A	G	1	FALSE	rs145827824:32103749:C:G	0.692767	C6orf25 (0 kb, 3'utr/3 prime UTR/MODIFIER | near_gene/Downstream gene/MODIFIER); DDAH2 (1.8 kb, near_gene/Downstream gene/MODIFIER); LY6G6C (3.3 kb, near_gene/Upstream gene/MODIFIER); CLIC1 (5.4 kb); LY6G6F (7.4 kb); LY6G6D (7.4 kb); LY6G6E (11 kb); MSH5 (15 kb); MSH5-SAPCD1 (15 kb); ABHD16A (22 kb); MIR4646 (24 kb); RNU6-850P (32 kb); SAPCD1 (38 kb); SAPCD1-AS1 (39 kb); VWA7 (40 kb); LY6G5C (41 …	4.748	0.927 Bioavailable testosterone levels // 0.863 Aspartate aminotransferase levels in low alcohol consumption // 0.458 Neurological blood protein biomarker levels // 0.411 Heel bone mineral density // 0.346 Blood protein levels	- | ABCF1 | ABHD16A | AGER | AIF1 | APOM | ATF6B | ATP6V1G2 | ATP6V1G2-DDX39B | BAG6 | BAT4 | BRD2 | BTNL2 | C2 | C4A | C4B | C4B_2 | C6orf10 | C6orf25 | C6orf48 | CCHCR1 | CFB | CLIC1 | CSNK2B | CUTA | DDAH2 | DDR1 | DDX39B | DHX16 | DOM3Z | DXO | EHMT2 | FLOT1 | GPANK1 | GPSM3 | GTF2H4 | HCG22 | HCG23 | HCG27 | HCG4B | HCG4P3 | HCP5 | HLA-A | HLA-B | HLA-C | HLA-DOA | HLA-DOB | HLA-DPA1 | HLA-D…	ABP1 | BTN3A2 | CCDC69 | EXOC1 | FLOT1 | HLA-DRB1 | HLA-DRB4 | HLA-DRB5 | HLA-F | HLA-H | HLA-V | IER3 | LIMS1 | MDC1 | NHP2 | PARP2 | PSMB9 | SSRP1 | TAP2 | TMEM154 | TRAV12-1 | TUBB | ZAP70 | ZNF672 | ZNRD1	Systemic lupus erythematosus:HLA-DOB,HLA-DQA1,HLA-DRA,HLA-DRB1 | Antigen processing and presentation:HLA-C,HLA-DOB,HLA-DQA1,HLA-DRA,HLA-DRB1,HLA-E,HSPA1A,HSPA1B,HSPA1L,TAP2 | Allograft rejection:HLA-C,HLA-DOB,HLA-DQA1,HLA-DRA,HLA-DRB1,HLA-E | Type I diabetes mellitus:HLA-C,HLA-DOB,HLA-DQA1,HLA-DRA,HLA-DRB1,HLA-E,LTA | Graft-versus-host disease:HLA-C,HLA-DOB,HLA-DQA1,HLA-DRA,HLA-DRB1,HLA-E | Autoi…	Translocation of ZAP-70 to Immunological synapse:HLA-DQA1,HLA-DRA,HLA-DRB1 | Interferon gamma signaling:HLA-C,HLA-DQA1,HLA-DRA,HLA-DRB1,HLA-E | Generation of second messenger molecules:HLA-DQA1,HLA-DRA,HLA-DRB1 | Phosphorylation of CD3 and TCR zeta chains:HLA-DQA1,HLA-DRA,HLA-DRB1 | PD-1 signaling:HLA-DQA1,HLA-DRA,HLA-DRB1 | Interferon Signaling:HLA-C,HLA-DQA1,HLA-DRA,HLA-DRB1,HLA-E,PSMB8 | RNA P…	Kawasaki disease:ABHD16A,BAG6,HLA-C,HLA-DRB1,HLA-E,PRRC2A | lymphadenitis:ABHD16A,BAG6,HLA-C,HLA-DRB1,HLA-E,PRRC2A | lymph node disease:ABHD16A,BAG6,HLA-C,HLA-DRB1,HLA-E,PRRC2A | leprosy:HLA-DRB1,LTA | Graves' disease:HLA-C,HLA-DQA1,HLA-DRB1,TAP2 | sarcoidosis:DDR1,HLA-DQA1,HLA-DRB1,HSPA1L,LTA | hypersensitivity reaction type IV disease:DDR1,HLA-DQA1,HLA-DRB1,HSPA1L,LTA | hepatitis:HLA-C,HLA-DQA1…	antigen processing and presentation of exogenous peptide antigen:HLA-C,HLA-DOB,HLA-DQA1,HLA-DRA,HLA-DRB1,HLA-E,PSMB8,TAP2 | antigen processing and presentation of exogenous antigen:HLA-C,HLA-DOB,HLA-DQA1,HLA-DRA,HLA-DRB1,HLA-E,PSMB8,TAP2 | antigen processing and presentation of peptide antigen:HLA-C,HLA-DOB,HLA-DQA1,HLA-DRA,HLA-DRB1,HLA-E,PSMB8,TAP2 | adaptive immune response:HLA-C,HLA-DOB,HLA-DQ…	OHP17_all	23.7878	0.0285836	0.0162017	0.0162017	3549	0.14462	0.0564345	1.98344	0.460702	0.195086	0.0465064	4.56369	0	0.0967173	0.103402	0.456422	0.0893255	0.517804	0.0506707	23.7878	0	0.500945	0.0569146	17.8704	0	0.52925	0.0935128	7.82046	0.25539	0.124807
rs115111668:32151882:C:T	6	32151882	6p21.32	T	C	0.932906	FALSE	rs145827824:32103749:C:G	0.914804	AGER (0 kb, 5'utr/5 prime UTR/MODIFIER | nc-exon/Non coding transcript exon/MODIFIER | intron/Intron/MODIFIER | nc-RNA/Non coding transcript/MODIFIER | near_gene/Upstream gene/MODIFIER); RNF5 (0 kb, 3'utr/3 prime UTR/MODIFIER | near_gene/Downstream gene/MODIFIER); PBX2 (0.63 kb, near_gene/Downstream gene/MODIFIER); XXbac-BPG300A18.13 (0.63 kb, near_gene/Downstream gene/MODIFIER); AGPAT1 (6 kb); G…	0.751	0.714 Bioavailable testosterone levels // 0.545 Aspartate aminotransferase levels in low alcohol consumption	- | ABCF1 | ABHD16A | AGER | AIF1 | ATF6B | ATP6V1G2 | BAG6 | BRD2 | C4A | C4B | C4B_2 | C6orf10 | C6orf25 | C6orf48 | CCHCR1 | CFB | CLIC1 | CSNK2B | CUTA | CYP21A2 | DDAH2 | DDR1 | DDX39B | DOM3Z | DXO | EHMT2 | FLOT1 | GPANK1 | GPSM3 | GTF2H4 | HCG22 | HCG23 | HCG27 | HCP5 | HLA-B | HLA-C | HLA-DOA | HLA-DOB | HLA-DPA1 | HLA-DQA1 | HLA-DQA2 | HLA-DQB1 | HLA-DQB1-AS1 | HLA-DQB2 | HLA-DRA | HLA-…	ABP1 | FLOT1 | HLA-E | HLA-F | HLA-H | HLA-V | IER3 | LIMS1 | LINC00243 | NHP2 | PPP1R11 | VARS2 | ZNRD1	Systemic lupus erythematosus:HLA-DOB,HLA-DQA1,HLA-DQA2,HLA-DRA,HLA-DRB1,HLA-DRB5 | Antigen processing and presentation:HLA-C,HLA-DOB,HLA-DQA1,HLA-DQA2,HLA-DRA,HLA-DRB1,HLA-DRB5,HSPA1A,HSPA1B,HSPA1L,TAP2 | Allograft rejection:HLA-C,HLA-DOB,HLA-DQA1,HLA-DQA2,HLA-DRA,HLA-DRB1,HLA-DRB5 | Type I diabetes mellitus:HLA-C,HLA-DOB,HLA-DQA1,HLA-DQA2,HLA-DRA,HLA-DRB1,HLA-DRB5 | Graft-versus-host disease:HLA…	Translocation of ZAP-70 to Immunological synapse:HLA-DQA1,HLA-DQA2,HLA-DRA,HLA-DRB1,HLA-DRB5 | Interferon gamma signaling:HLA-C,HLA-DQA1,HLA-DQA2,HLA-DRA,HLA-DRB1,HLA-DRB5 | Generation of second messenger molecules:HLA-DQA1,HLA-DQA2,HLA-DRA,HLA-DRB1,HLA-DRB5 | Phosphorylation of CD3 and TCR zeta chains:HLA-DQA1,HLA-DQA2,HLA-DRA,HLA-DRB1,HLA-DRB5 | PD-1 signaling:HLA-DQA1,HLA-DQA2,HLA-DRA,HLA-DRB1…	Kawasaki disease:BAG6,HLA-C,HLA-DRB1,PRRC2A | lymphadenitis:BAG6,HLA-C,HLA-DRB1,PRRC2A | lymph node disease:BAG6,HLA-C,HLA-DRB1,PRRC2A | leprosy:HLA-DRB1 | Graves' disease:HLA-C,HLA-DQA1,HLA-DRB1,TAP2 | sarcoidosis:AGER,DDR1,HLA-DQA1,HLA-DRB1,HSPA1L | hypersensitivity reaction type IV disease:AGER,DDR1,HLA-DQA1,HLA-DRB1,HSPA1L | hepatitis:HLA-C,HLA-DQA1,HLA-DRB1,NCR3,PSMB9 | autoimmune disease of…	antigen processing and presentation of exogenous peptide antigen:HLA-C,HLA-DOB,HLA-DQA1,HLA-DQA2,HLA-DRA,HLA-DRB1,HLA-DRB5,PSMB8,PSMB9,TAP2 | antigen processing and presentation of exogenous antigen:HLA-C,HLA-DOB,HLA-DQA1,HLA-DQA2,HLA-DRA,HLA-DRB1,HLA-DRB5,PSMB8,PSMB9,TAP2 | antigen processing and presentation of peptide antigen:HLA-C,HLA-DOB,HLA-DQA1,HLA-DQA2,HLA-DRA,HLA-DRB1,HLA-DRB5,PSMB8,PSMB…	OHP17_all	23.7742	0.0285671	0.011351	0.011351	3549	0.214407	0.0685069	2.75701	0	0.236633	0.0546999	4.81866	0.471071	0.154669	0.128929	0.637744	0.484981	0.629751	0.0616438	23.7742	0.655458	0.493608	0.0671803	12.6948	0	0.855748	0.11988	12.0261	0	0.132927
rs36221133:31912523:T:C	6	31912523	6p21.33	C	T	0.995504	FALSE	rs145827824:32103749:C:G	0.780923	C2 (0 kb, exon/Missense/MODERATE | 3'utr/3 prime UTR/MODIFIER | nc-exon/Non coding transcript exon/MODIFIER | intron/NMD transcript/MODIFIER | nc-RNA/Non coding transcript/MODIFIER | near_gene/Downstream gene/MODIFIER); CFB (0 kb, exon/Missense/MODERATE | near_gene/Upstream gene/MODIFIER); CFB (0 kb, exon/Missense/MODERATE | near_gene/Upstream gene/MODIFIER); NELFE (7.3 kb); MIR1236 (12 kb); SKIV…	0.001	1 Bioavailable testosterone levels // 0.799 Aspartate aminotransferase levels in low alcohol consumption // 0.422 Neurological blood protein biomarker levels // 0.38 Heel bone mineral density // 0.319 Blood protein levels	- | ABCF1 | ABHD16A | AGER | AIF1 | APOM | ATF6B | ATP6V1G2 | ATP6V1G2-DDX39B | BAG6 | BAT4 | BRD2 | BTNL2 | C2 | C4A | C4B | C4B_2 | C6orf10 | C6orf25 | C6orf48 | CCHCR1 | CFB | CLIC1 | CSNK2B | CUTA | CYP21A2 | DDAH2 | DDR1 | DDX39B | DOM3Z | DXO | EHMT2 | FLOT1 | GPANK1 | GPSM3 | GTF2H4 | HCG22 | HCG23 | HCG27 | HCP5 | HLA-B | HLA-C | HLA-DOA | HLA-DOB | HLA-DPA1 | HLA-DQA1 | HLA-DQA2 | HLA-DQ…	ABP1 | BTN3A2 | CCDC69 | EXOC1 | FLOT1 | HLA-DRB1 | HLA-DRB4 | HLA-DRB5 | HLA-F | HLA-H | HLA-V | IER3 | LIMS1 | LINC00243 | MDC1 | NHP2 | PARP2 | PPP1R11 | PSMB9 | SSRP1 | TMEM154 | TRAV12-1 | TUBB | ZAP70 | ZNF672 | ZNRD1	Systemic lupus erythematosus:C2,C4A,C4B,HLA-DOB,HLA-DQA1,HLA-DRA,HLA-DRB1 | Antigen processing and presentation:HLA-C,HLA-DOB,HLA-DQA1,HLA-DRA,HLA-DRB1,HLA-E,HSPA1A,HSPA1B,HSPA1L,TAP2 | Allograft rejection:HLA-C,HLA-DOB,HLA-DQA1,HLA-DRA,HLA-DRB1,HLA-E | Type I diabetes mellitus:HLA-C,HLA-DOB,HLA-DQA1,HLA-DRA,HLA-DRB1,HLA-E,LTA | Graft-versus-host disease:HLA-C,HLA-DOB,HLA-DQA1,HLA-DRA,HLA-DRB1,HL…	Translocation of ZAP-70 to Immunological synapse:HLA-DQA1,HLA-DRA,HLA-DRB1 | Interferon gamma signaling:HLA-C,HLA-DQA1,HLA-DRA,HLA-DRB1,HLA-E | Generation of second messenger molecules:HLA-DQA1,HLA-DRA,HLA-DRB1 | Phosphorylation of CD3 and TCR zeta chains:HLA-DQA1,HLA-DRA,HLA-DRB1 | PD-1 signaling:HLA-DQA1,HLA-DRA,HLA-DRB1 | Interferon Signaling:HLA-C,HLA-DQA1,HLA-DRA,HLA-DRB1,HLA-E,PSMB8 | ERCC6…	Kawasaki disease:BAG6,HLA-C,HLA-DRB1,HLA-E,PRRC2A | lymphadenitis:BAG6,HLA-C,HLA-DRB1,HLA-E,PRRC2A | lymph node disease:BAG6,HLA-C,HLA-DRB1,HLA-E,PRRC2A | leprosy:HLA-DRB1,LTA | Graves' disease:HLA-C,HLA-DQA1,HLA-DRB1,TAP2 | sarcoidosis:DDR1,HLA-DQA1,HLA-DRB1,HSPA1L,LTA | hypersensitivity reaction type IV disease:DDR1,HLA-DQA1,HLA-DRB1,HSPA1L,LTA | hepatitis:HLA-C,HLA-DQA1,HLA-DRB1,HLA-E,LTA,NCR3…	antigen processing and presentation of exogenous peptide antigen:HLA-C,HLA-DOB,HLA-DQA1,HLA-DRA,HLA-DRB1,HLA-E,PSMB8,TAP2 | antigen processing and presentation of exogenous antigen:HLA-C,HLA-DOB,HLA-DQA1,HLA-DRA,HLA-DRB1,HLA-E,PSMB8,TAP2 | antigen processing and presentation of peptide antigen:HLA-C,HLA-DOB,HLA-DQA1,HLA-DRA,HLA-DRB1,HLA-E,PSMB8,TAP2 | adaptive immune response:C2,C4A,C4B,HLA-C,HLA…	OHP17_all	23.7643	0.0285551	0.0149412	0.0149412	3549	0.150471	0.0586486	1.98722	0.259252	0.211444	0.0483475	4.91255	0	0.0836364	0.106267	0.365262	0.0447149	0.538935	0.0527656	23.7643	0.0719144	0.508388	0.0589876	17.1687	0	0.574923	0.0980403	8.3471	0.477645	0.114181
rs28399993:31732155:G:A	6	31732155	6p21.33	A	G	0.994087	FALSE	rs145827824:32103749:C:G	0.692767	MSH5-SAPCD1 (0 kb, 3'utr/3 prime UTR/MODIFIER | intron/NMD transcript/MODIFIER | intron/Intron/MODIFIER | near_gene/Downstream gene/MODIFIER); SAPCD1-AS1 (0 kb, nc-exon/Non coding transcript exon/MODIFIER | nc-RNA/Non coding transcript/MODIFIER); MSH5 (0 kb, intron/Intron/MODIFIER | near_gene/Downstream gene/MODIFIER); SAPCD1 (0 kb, intron/Intron/MODIFIER | near_gene/Downstream gene/MODIFIER); VW…	5.169	0.927 Bioavailable testosterone levels // 0.863 Aspartate aminotransferase levels in low alcohol consumption // 0.458 Neurological blood protein biomarker levels // 0.411 Heel bone mineral density // 0.346 Blood protein levels	- | ABCF1 | ABHD16A | AGER | AIF1 | APOM | ATF6B | ATP6V1G2 | ATP6V1G2-DDX39B | BAG6 | BAT4 | BRD2 | BTNL2 | C2 | C4A | C4B | C4B_2 | C6orf10 | C6orf25 | C6orf48 | CCHCR1 | CFB | CLIC1 | CSNK2B | CUTA | DDAH2 | DDR1 | DDX39B | DHX16 | DOM3Z | DXO | EHMT2 | FLOT1 | GPANK1 | GPSM3 | GTF2H4 | HCG22 | HCG23 | HCG27 | HCG4B | HCG4P3 | HCP5 | HLA-A | HLA-B | HLA-C | HLA-DOA | HLA-DOB | HLA-DPA1 | HLA-D…	ABP1 | BTN3A2 | CCDC69 | EXOC1 | FLOT1 | HLA-DRB1 | HLA-DRB4 | HLA-DRB5 | HLA-F | HLA-H | HLA-V | IER3 | LIMS1 | MDC1 | NHP2 | PARP2 | PSMB9 | SSRP1 | TAP2 | TMEM154 | TRAV12-1 | TUBB | ZAP70 | ZNF672 | ZNRD1	Systemic lupus erythematosus:HLA-DOB,HLA-DQA1,HLA-DRA,HLA-DRB1 | Antigen processing and presentation:HLA-C,HLA-DOB,HLA-DQA1,HLA-DRA,HLA-DRB1,HLA-E,HSPA1A,HSPA1B,HSPA1L,TAP2 | Allograft rejection:HLA-C,HLA-DOB,HLA-DQA1,HLA-DRA,HLA-DRB1,HLA-E | Type I diabetes mellitus:HLA-C,HLA-DOB,HLA-DQA1,HLA-DRA,HLA-DRB1,HLA-E,LTA | Graft-versus-host disease:HLA-C,HLA-DOB,HLA-DQA1,HLA-DRA,HLA-DRB1,HLA-E | Autoi…	Translocation of ZAP-70 to Immunological synapse:HLA-DQA1,HLA-DRA,HLA-DRB1 | Interferon gamma signaling:HLA-C,HLA-DQA1,HLA-DRA,HLA-DRB1,HLA-E | Generation of second messenger molecules:HLA-DQA1,HLA-DRA,HLA-DRB1 | Phosphorylation of CD3 and TCR zeta chains:HLA-DQA1,HLA-DRA,HLA-DRB1 | PD-1 signaling:HLA-DQA1,HLA-DRA,HLA-DRB1 | Interferon Signaling:HLA-C,HLA-DQA1,HLA-DRA,HLA-DRB1,HLA-E,PSMB8 | RNA P…	Kawasaki disease:ABHD16A,BAG6,HLA-C,HLA-DRB1,HLA-E,PRRC2A | lymphadenitis:ABHD16A,BAG6,HLA-C,HLA-DRB1,HLA-E,PRRC2A | lymph node disease:ABHD16A,BAG6,HLA-C,HLA-DRB1,HLA-E,PRRC2A | leprosy:HLA-DRB1,LTA | Graves' disease:HLA-C,HLA-DQA1,HLA-DRB1,TAP2 | sarcoidosis:DDR1,HLA-DQA1,HLA-DRB1,HSPA1L,LTA | hypersensitivity reaction type IV disease:DDR1,HLA-DQA1,HLA-DRB1,HSPA1L,LTA | hepatitis:HLA-C,HLA-DQA1…	antigen processing and presentation of exogenous peptide antigen:HLA-C,HLA-DOB,HLA-DQA1,HLA-DRA,HLA-DRB1,HLA-E,PSMB8,TAP2 | antigen processing and presentation of exogenous antigen:HLA-C,HLA-DOB,HLA-DQA1,HLA-DRA,HLA-DRB1,HLA-E,PSMB8,TAP2 | antigen processing and presentation of peptide antigen:HLA-C,HLA-DOB,HLA-DQA1,HLA-DRA,HLA-DRB1,HLA-E,PSMB8,TAP2 | adaptive immune response:HLA-C,HLA-DOB,HLA-DQ…	OHP17_all	23.741	0.0285268	0.0147292	0.0147292	3549	0.147334	0.0590872	1.89794	0.254993	0.213317	0.0484082	4.97886	0	0.0670734	0.107556	0.273368	0.131954	0.54176	0.0530692	23.741	0.133306	0.528521	0.059012	18.4734	0	0.550882	0.0994255	7.52226	0.211067	0.109075
rs201087775:31867004:TTC:T	6	31867004	6p21.33	T	TTC	0.988087	FALSE	rs145827824:32103749:C:G	0.692767	C2 (0 kb); ZBTB12 (0.38 kb); EHMT2 (1.5 kb); EHMT2-AS1 (15 kb); SLC44A4 (20 kb); CFB (28 kb); NEU1 (36 kb)	18.48	0.927 Bioavailable testosterone levels // 0.863 Aspartate aminotransferase levels in low alcohol consumption // 0.458 Neurological blood protein biomarker levels // 0.411 Heel bone mineral density // 0.346 Blood protein levels	- | ABCF1 | ABHD16A | AGER | AIF1 | APOM | ATF6B | ATP6V1G2 | ATP6V1G2-DDX39B | BAG6 | BAT4 | BRD2 | BTNL2 | C2 | C4A | C4B | C4B_2 | C6orf10 | C6orf25 | C6orf48 | CCHCR1 | CFB | CLIC1 | CSNK2B | CUTA | DDAH2 | DDR1 | DDX39B | DOM3Z | DXO | EHMT2 | FLOT1 | GPANK1 | GPSM3 | GTF2H4 | HCG22 | HCG23 | HCG27 | HCP5 | HLA-A | HLA-B | HLA-C | HLA-DOA | HLA-DOB | HLA-DPA1 | HLA-DQA1 | HLA-DQA2 | HLA-DQB1…	ABP1 | BTN3A2 | CCDC69 | EXOC1 | FLOT1 | HLA-DRB1 | HLA-DRB4 | HLA-DRB5 | HLA-F | HLA-H | HLA-V | IER3 | LIMS1 | MDC1 | NHP2 | PARP2 | PPP1R11 | PSMB9 | SSRP1 | TAP2 | TMEM154 | TRAV12-1 | TUBB | ZAP70 | ZNF672 | ZNRD1	Systemic lupus erythematosus:C2,HLA-DOB,HLA-DQA1,HLA-DRA,HLA-DRB1 | Antigen processing and presentation:HLA-C,HLA-DOB,HLA-DQA1,HLA-DRA,HLA-DRB1,HLA-E,HSPA1A,HSPA1B,HSPA1L,TAP2 | Allograft rejection:HLA-C,HLA-DOB,HLA-DQA1,HLA-DRA,HLA-DRB1,HLA-E | Type I diabetes mellitus:HLA-C,HLA-DOB,HLA-DQA1,HLA-DRA,HLA-DRB1,HLA-E,LTA | Graft-versus-host disease:HLA-C,HLA-DOB,HLA-DQA1,HLA-DRA,HLA-DRB1,HLA-E | Au…	Translocation of ZAP-70 to Immunological synapse:HLA-DQA1,HLA-DRA,HLA-DRB1 | Interferon gamma signaling:HLA-C,HLA-DQA1,HLA-DRA,HLA-DRB1,HLA-E | Generation of second messenger molecules:HLA-DQA1,HLA-DRA,HLA-DRB1 | Phosphorylation of CD3 and TCR zeta chains:HLA-DQA1,HLA-DRA,HLA-DRB1 | PD-1 signaling:HLA-DQA1,HLA-DRA,HLA-DRB1 | Interferon Signaling:HLA-C,HLA-DQA1,HLA-DRA,HLA-DRB1,HLA-E,PSMB8 | ERCC6…	Kawasaki disease:ABHD16A,BAG6,HLA-C,HLA-DRB1,HLA-E,PRRC2A | lymphadenitis:ABHD16A,BAG6,HLA-C,HLA-DRB1,HLA-E,PRRC2A | lymph node disease:ABHD16A,BAG6,HLA-C,HLA-DRB1,HLA-E,PRRC2A | leprosy:HLA-DRB1,LTA | Graves' disease:HLA-C,HLA-DQA1,HLA-DRB1,TAP2 | sarcoidosis:DDR1,HLA-DQA1,HLA-DRB1,HSPA1L,LTA | hypersensitivity reaction type IV disease:DDR1,HLA-DQA1,HLA-DRB1,HSPA1L,LTA | hepatitis:HLA-C,HLA-DQA1…	antigen processing and presentation of exogenous peptide antigen:HLA-C,HLA-DOB,HLA-DQA1,HLA-DRA,HLA-DRB1,HLA-E,PSMB8,TAP2 | antigen processing and presentation of exogenous antigen:HLA-C,HLA-DOB,HLA-DQA1,HLA-DRA,HLA-DRB1,HLA-E,PSMB8,TAP2 | antigen processing and presentation of peptide antigen:HLA-C,HLA-DOB,HLA-DQA1,HLA-DRA,HLA-DRB1,HLA-E,PSMB8,TAP2 | adaptive immune response:C2,HLA-C,HLA-DOB,HLA…	OHP17_all	23.7158	0.0284963	0.0144263	0.0144263	3549	0.150622	0.0600227	1.91746	0.414162	0.218515	0.0494933	4.9957	0	0.0768312	0.108677	0.319134	0.311423	0.55061	0.0539659	23.7158	0	0.537019	0.060342	18.2514	0	0.56032	0.100309	7.63488	0.0453055	0.106273
rs28381355:31711572:G:A	6	31711572	6p21.33	A	G	0.994504	FALSE	rs145827824:32103749:C:G	0.692767	MSH5 (0 kb, intron/NMD transcript/MODIFIER | intron/Intron/MODIFIER | nc-RNA/Non coding transcript/MODIFIER | near_gene/Upstream gene/MODIFIER | near_gene/Downstream gene/MODIFIER); MSH5-SAPCD1 (0 kb, intron/NMD transcript/MODIFIER | intron/Intron/MODIFIER); CLIC1 (4 kb, near_gene/Upstream gene/MODIFIER); RNU6-850P (13 kb); DDAH2 (13 kb); C6orf25 (17 kb); SAPCD1 (19 kb); SAPCD1-AS1 (21 kb); VWA7 …	13.47	0.927 Bioavailable testosterone levels // 0.863 Aspartate aminotransferase levels in low alcohol consumption // 0.458 Neurological blood protein biomarker levels // 0.411 Heel bone mineral density // 0.346 Blood protein levels	- | ABCF1 | ABHD16A | AGER | AIF1 | APOM | ATF6B | ATP6V1G2 | ATP6V1G2-DDX39B | BAG6 | BAT4 | BRD2 | BTNL2 | C2 | C4A | C4B | C4B_2 | C6orf10 | C6orf25 | C6orf48 | CCHCR1 | CFB | CLIC1 | CSNK2B | CUTA | DDAH2 | DDR1 | DDX39B | DHX16 | DOM3Z | DXO | EHMT2 | FLOT1 | GPANK1 | GPSM3 | GTF2H4 | HCG22 | HCG23 | HCG27 | HCG4B | HCG4P3 | HCP5 | HLA-A | HLA-B | HLA-C | HLA-DOA | HLA-DOB | HLA-DPA1 | HLA-D…	ABP1 | BTN3A2 | CCDC69 | EXOC1 | FLOT1 | HLA-DRB1 | HLA-DRB4 | HLA-DRB5 | HLA-F | HLA-H | HLA-V | IER3 | LIMS1 | MDC1 | NHP2 | PARP2 | PSMB9 | SSRP1 | TAP2 | TMEM154 | TRAV12-1 | TUBB | ZAP70 | ZNF672 | ZNRD1	Systemic lupus erythematosus:HLA-DOB,HLA-DQA1,HLA-DRA,HLA-DRB1 | Antigen processing and presentation:HLA-C,HLA-DOB,HLA-DQA1,HLA-DRA,HLA-DRB1,HLA-E,HSPA1A,HSPA1B,HSPA1L,TAP2 | Allograft rejection:HLA-C,HLA-DOB,HLA-DQA1,HLA-DRA,HLA-DRB1,HLA-E | Type I diabetes mellitus:HLA-C,HLA-DOB,HLA-DQA1,HLA-DRA,HLA-DRB1,HLA-E,LTA | Graft-versus-host disease:HLA-C,HLA-DOB,HLA-DQA1,HLA-DRA,HLA-DRB1,HLA-E | Autoi…	Translocation of ZAP-70 to Immunological synapse:HLA-DQA1,HLA-DRA,HLA-DRB1 | Interferon gamma signaling:HLA-C,HLA-DQA1,HLA-DRA,HLA-DRB1,HLA-E | Generation of second messenger molecules:HLA-DQA1,HLA-DRA,HLA-DRB1 | Phosphorylation of CD3 and TCR zeta chains:HLA-DQA1,HLA-DRA,HLA-DRB1 | PD-1 signaling:HLA-DQA1,HLA-DRA,HLA-DRB1 | Interferon Signaling:HLA-C,HLA-DQA1,HLA-DRA,HLA-DRB1,HLA-E,PSMB8 | RNA P…	Kawasaki disease:ABHD16A,BAG6,HLA-C,HLA-DRB1,HLA-E,PRRC2A | lymphadenitis:ABHD16A,BAG6,HLA-C,HLA-DRB1,HLA-E,PRRC2A | lymph node disease:ABHD16A,BAG6,HLA-C,HLA-DRB1,HLA-E,PRRC2A | leprosy:HLA-DRB1,LTA | Graves' disease:HLA-C,HLA-DQA1,HLA-DRB1,TAP2 | sarcoidosis:DDR1,HLA-DQA1,HLA-DRB1,HSPA1L,LTA | hypersensitivity reaction type IV disease:DDR1,HLA-DQA1,HLA-DRB1,HSPA1L,LTA | hepatitis:HLA-C,HLA-DQA1…	antigen processing and presentation of exogenous peptide antigen:HLA-C,HLA-DOB,HLA-DQA1,HLA-DRA,HLA-DRB1,HLA-E,PSMB8,TAP2 | antigen processing and presentation of exogenous antigen:HLA-C,HLA-DOB,HLA-DQA1,HLA-DRA,HLA-DRB1,HLA-E,PSMB8,TAP2 | antigen processing and presentation of peptide antigen:HLA-C,HLA-DOB,HLA-DQA1,HLA-DRA,HLA-DRB1,HLA-E,PSMB8,TAP2 | adaptive immune response:HLA-C,HLA-DOB,HLA-DQ…	OHP17_all	23.7126	0.0284924	0.014757	0.014757	3549	0.147047	0.0590056	1.8962	0.250028	0.212965	0.0483509	4.97473	0	0.0669051	0.107438	0.272897	0.126004	0.54057	0.0529856	23.7126	0.142436	0.528015	0.0589503	18.4766	0	0.548486	0.0991822	7.49609	0.242079	0.10843
rs141245431:31715570:G:A	6	31715570	6p21.33	A	G	0.994504	FALSE	rs145827824:32103749:C:G	0.692767	MSH5 (0 kb, intron/NMD transcript/MODIFIER | intron/Intron/MODIFIER | near_gene/Downstream gene/MODIFIER | near_gene/Upstream gene/MODIFIER); MSH5-SAPCD1 (0 kb, intron/NMD transcript/MODIFIER | intron/Intron/MODIFIER); CLIC1 (8 kb); RNU6-850P (9.2 kb); SAPCD1 (15 kb); SAPCD1-AS1 (17 kb); DDAH2 (17 kb); VWA7 (18 kb); C6orf25 (21 kb); LY6G6C (26 kb); VARS (30 kb); LY6G6F (30 kb); LY6G6D (30 kb); LY…	2.296	0.927 Bioavailable testosterone levels // 0.863 Aspartate aminotransferase levels in low alcohol consumption // 0.458 Neurological blood protein biomarker levels // 0.411 Heel bone mineral density // 0.346 Blood protein levels	- | ABCF1 | ABHD16A | AGER | AIF1 | APOM | ATF6B | ATP6V1G2 | ATP6V1G2-DDX39B | BAG6 | BAT4 | BRD2 | BTNL2 | C2 | C4A | C4B | C4B_2 | C6orf10 | C6orf25 | C6orf48 | CCHCR1 | CFB | CLIC1 | CSNK2B | CUTA | DDAH2 | DDR1 | DDX39B | DHX16 | DOM3Z | DXO | EHMT2 | FLOT1 | GPANK1 | GPSM3 | GTF2H4 | HCG22 | HCG23 | HCG27 | HCG4B | HCG4P3 | HCP5 | HLA-A | HLA-B | HLA-C | HLA-DOA | HLA-DOB | HLA-DPA1 | HLA-D…	ABP1 | BTN3A2 | CCDC69 | EXOC1 | FLOT1 | HLA-DRB1 | HLA-DRB4 | HLA-DRB5 | HLA-F | HLA-H | HLA-V | IER3 | LIMS1 | MDC1 | NHP2 | PARP2 | PSMB9 | SSRP1 | TAP2 | TMEM154 | TRAV12-1 | TUBB | ZAP70 | ZNF672 | ZNRD1	Systemic lupus erythematosus:HLA-DOB,HLA-DQA1,HLA-DRA,HLA-DRB1 | Antigen processing and presentation:HLA-C,HLA-DOB,HLA-DQA1,HLA-DRA,HLA-DRB1,HLA-E,HSPA1A,HSPA1B,HSPA1L,TAP2 | Allograft rejection:HLA-C,HLA-DOB,HLA-DQA1,HLA-DRA,HLA-DRB1,HLA-E | Type I diabetes mellitus:HLA-C,HLA-DOB,HLA-DQA1,HLA-DRA,HLA-DRB1,HLA-E,LTA | Graft-versus-host disease:HLA-C,HLA-DOB,HLA-DQA1,HLA-DRA,HLA-DRB1,HLA-E | Autoi…	Translocation of ZAP-70 to Immunological synapse:HLA-DQA1,HLA-DRA,HLA-DRB1 | Interferon gamma signaling:HLA-C,HLA-DQA1,HLA-DRA,HLA-DRB1,HLA-E | Generation of second messenger molecules:HLA-DQA1,HLA-DRA,HLA-DRB1 | Phosphorylation of CD3 and TCR zeta chains:HLA-DQA1,HLA-DRA,HLA-DRB1 | PD-1 signaling:HLA-DQA1,HLA-DRA,HLA-DRB1 | Interferon Signaling:HLA-C,HLA-DQA1,HLA-DRA,HLA-DRB1,HLA-E,PSMB8 | RNA P…	Kawasaki disease:ABHD16A,BAG6,HLA-C,HLA-DRB1,HLA-E,PRRC2A | lymphadenitis:ABHD16A,BAG6,HLA-C,HLA-DRB1,HLA-E,PRRC2A | lymph node disease:ABHD16A,BAG6,HLA-C,HLA-DRB1,HLA-E,PRRC2A | leprosy:HLA-DRB1,LTA | Graves' disease:HLA-C,HLA-DQA1,HLA-DRB1,TAP2 | sarcoidosis:DDR1,HLA-DQA1,HLA-DRB1,HSPA1L,LTA | hypersensitivity reaction type IV disease:DDR1,HLA-DQA1,HLA-DRB1,HSPA1L,LTA | hepatitis:HLA-C,HLA-DQA1…	antigen processing and presentation of exogenous peptide antigen:HLA-C,HLA-DOB,HLA-DQA1,HLA-DRA,HLA-DRB1,HLA-E,PSMB8,TAP2 | antigen processing and presentation of exogenous antigen:HLA-C,HLA-DOB,HLA-DQA1,HLA-DRA,HLA-DRB1,HLA-E,PSMB8,TAP2 | antigen processing and presentation of peptide antigen:HLA-C,HLA-DOB,HLA-DQA1,HLA-DRA,HLA-DRB1,HLA-E,PSMB8,TAP2 | adaptive immune response:HLA-C,HLA-DOB,HLA-DQ…	OHP17_all	23.7111	0.0284906	0.0147568	0.0147568	3549	0.147056	0.0590078	1.89628	0.249903	0.212986	0.0483532	4.97515	0	0.0669051	0.107438	0.272897	0.126004	0.540567	0.052987	23.7111	0.142404	0.52801	0.0589529	18.4746	0	0.548486	0.0991822	7.49609	0.242079	0.108423
rs184265581:31900754:G:C	6	31900754	6p21.33	C	G	0.993669	FALSE	rs145827824:32103749:C:G	0.780923	C2 (0 kb, intron/NMD transcript/MODIFIER | intron/Intron/MODIFIER | near_gene/Downstream gene/MODIFIER | near_gene/Upstream gene/MODIFIER); CFB (0 kb, intron/Intron/MODIFIER); CFB (0 kb, intron/Intron/MODIFIER); NELFE (19 kb); MIR1236 (24 kb); SKIV2L (26 kb); ZBTB12 (31 kb); EHMT2 (35 kb); DXO (37 kb); STK19 (38 kb); EHMT2-AS1 (49 kb); C4A (49 kb)	0.628	1 Bioavailable testosterone levels // 0.799 Aspartate aminotransferase levels in low alcohol consumption // 0.422 Neurological blood protein biomarker levels // 0.38 Heel bone mineral density // 0.319 Blood protein levels	- | ABCF1 | ABHD16A | AGER | AIF1 | APOM | ATF6B | ATP6V1G2 | ATP6V1G2-DDX39B | BAG6 | BAT4 | BRD2 | BTNL2 | C2 | C4A | C4B | C4B_2 | C6orf10 | C6orf25 | C6orf48 | CCHCR1 | CFB | CLIC1 | CSNK2B | CUTA | CYP21A2 | DDAH2 | DDR1 | DDX39B | DOM3Z | DXO | EHMT2 | FLOT1 | GPANK1 | GPSM3 | GTF2H4 | HCG22 | HCG23 | HCG27 | HCP5 | HLA-B | HLA-C | HLA-DOA | HLA-DOB | HLA-DPA1 | HLA-DQA1 | HLA-DQA2 | HLA-DQ…	ABP1 | BTN3A2 | CCDC69 | EXOC1 | FLOT1 | HLA-DRB1 | HLA-DRB4 | HLA-DRB5 | HLA-F | HLA-H | HLA-V | IER3 | LIMS1 | LINC00243 | MDC1 | NHP2 | PARP2 | PPP1R11 | PSMB9 | SSRP1 | TMEM154 | TRAV12-1 | TUBB | ZAP70 | ZNF672 | ZNRD1	Systemic lupus erythematosus:C2,C4A,C4B,HLA-DOB,HLA-DQA1,HLA-DRA,HLA-DRB1 | Antigen processing and presentation:HLA-C,HLA-DOB,HLA-DQA1,HLA-DRA,HLA-DRB1,HLA-E,HSPA1A,HSPA1B,HSPA1L,TAP2 | Allograft rejection:HLA-C,HLA-DOB,HLA-DQA1,HLA-DRA,HLA-DRB1,HLA-E | Type I diabetes mellitus:HLA-C,HLA-DOB,HLA-DQA1,HLA-DRA,HLA-DRB1,HLA-E,LTA | Graft-versus-host disease:HLA-C,HLA-DOB,HLA-DQA1,HLA-DRA,HLA-DRB1,HL…	Translocation of ZAP-70 to Immunological synapse:HLA-DQA1,HLA-DRA,HLA-DRB1 | Interferon gamma signaling:HLA-C,HLA-DQA1,HLA-DRA,HLA-DRB1,HLA-E | Generation of second messenger molecules:HLA-DQA1,HLA-DRA,HLA-DRB1 | Phosphorylation of CD3 and TCR zeta chains:HLA-DQA1,HLA-DRA,HLA-DRB1 | PD-1 signaling:HLA-DQA1,HLA-DRA,HLA-DRB1 | Interferon Signaling:HLA-C,HLA-DQA1,HLA-DRA,HLA-DRB1,HLA-E,PSMB8 | ERCC6…	Kawasaki disease:BAG6,HLA-C,HLA-DRB1,HLA-E,PRRC2A | lymphadenitis:BAG6,HLA-C,HLA-DRB1,HLA-E,PRRC2A | lymph node disease:BAG6,HLA-C,HLA-DRB1,HLA-E,PRRC2A | leprosy:HLA-DRB1,LTA | Graves' disease:HLA-C,HLA-DQA1,HLA-DRB1,TAP2 | sarcoidosis:DDR1,HLA-DQA1,HLA-DRB1,HSPA1L,LTA | hypersensitivity reaction type IV disease:DDR1,HLA-DQA1,HLA-DRB1,HSPA1L,LTA | hepatitis:HLA-C,HLA-DQA1,HLA-DRB1,HLA-E,LTA,NCR3…	antigen processing and presentation of exogenous peptide antigen:HLA-C,HLA-DOB,HLA-DQA1,HLA-DRA,HLA-DRB1,HLA-E,PSMB8,TAP2 | antigen processing and presentation of exogenous antigen:HLA-C,HLA-DOB,HLA-DQA1,HLA-DRA,HLA-DRB1,HLA-E,PSMB8,TAP2 | antigen processing and presentation of peptide antigen:HLA-C,HLA-DOB,HLA-DQA1,HLA-DRA,HLA-DRB1,HLA-E,PSMB8,TAP2 | adaptive immune response:C2,C4A,C4B,HLA-C,HLA…	OHP17_all	23.6955	0.0284717	0.0148686	0.0148686	3549	0.150756	0.0587524	1.98761	0.258178	0.212209	0.0485408	4.90923	0	0.0826908	0.106362	0.359624	0.0590591	0.539687	0.0529188	23.6955	0	0.51089	0.0592411	17.189	0	0.572769	0.0981329	8.27532	0.46301	0.113728
6:32009351:C:T	6	32009351	6p21.33	T	C	0.875748	FALSE	rs145827824:32103749:C:G	0.400574	CYP21A2 (0 kb, 3'utr/3 prime UTR/MODIFIER | nc-exon/Non coding transcript exon/MODIFIER | nc-RNA/Non coding transcript/MODIFIER | near_gene/Downstream gene/MODIFIER); TNXB (0 kb, intron/Intron/MODIFIER | nc-RNA/Non coding transcript/MODIFIER | near_gene/Downstream gene/MODIFIER); C4B-AS1 (5.3 kb); C4B (6.2 kb); STK19P (28 kb); TNXA (29 kb); CYP21A1P (33 kb); RNA5SP206 (37 kb); C4A-AS1 (38 kb); C4…		0.565 Bioavailable testosterone levels // 0.399 Aspartate aminotransferase levels in low alcohol consumption	- | ABCF1 | ABHD16A | AIF1 | ATF6B | ATP6V1G2 | ATP6V1G2-DDX39B | BAG6 | C2 | C4A | C4B | C4B_2 | C6orf10 | C6orf48 | CCHCR1 | CLIC1 | CSNK2B | DDAH2 | DDR1 | DDX39B | DXO | FLOT1 | GPANK1 | GPSM3 | GTF2H4 | HCG22 | HCG23 | HCG27 | HCP5 | HLA-B | HLA-C | HLA-DOA | HLA-DOB | HLA-DQA1 | HLA-DQA2 | HLA-DQB1 | HLA-DRA | HLA-DRB1 | HLA-DRB2 | HLA-DRB3 | HLA-DRB4 | HLA-DRB5 | HLA-DRB6 | HLA-DRB7 | HLA-…	BTN3A2 | FLOT1 | HLA-DQA1 | HLA-DRB1 | HLA-DRB4 | HLA-DRB5 | HLA-F | HLA-H | IER3 | LIMS1 | LINC00243 | VARS2 | ZNRD1	Systemic lupus erythematosus:C4A,C4B,HLA-DOB,HLA-DQA1,HLA-DRA,HLA-DRB1 | Antigen processing and presentation:HLA-C,HLA-DOB,HLA-DQA1,HLA-DRA,HLA-DRB1,HSPA1A,HSPA1B,HSPA1L,TAP2 | Allograft rejection:HLA-C,HLA-DOB,HLA-DQA1,HLA-DRA,HLA-DRB1 | Type I diabetes mellitus:HLA-C,HLA-DOB,HLA-DQA1,HLA-DRA,HLA-DRB1 | Graft-versus-host disease:HLA-C,HLA-DOB,HLA-DQA1,HLA-DRA,HLA-DRB1 | Autoimmune thyroid diseas…	Translocation of ZAP-70 to Immunological synapse:HLA-DQA1,HLA-DRA,HLA-DRB1 | Interferon gamma signaling:HLA-C,HLA-DQA1,HLA-DRA,HLA-DRB1 | Generation of second messenger molecules:HLA-DQA1,HLA-DRA,HLA-DRB1 | Phosphorylation of CD3 and TCR zeta chains:HLA-DQA1,HLA-DRA,HLA-DRB1 | PD-1 signaling:HLA-DQA1,HLA-DRA,HLA-DRB1 | Interferon Signaling:HLA-C,HLA-DQA1,HLA-DRA,HLA-DRB1 | RNA Polymerase I Promot…	Kawasaki disease:BAG6,HLA-C,HLA-DRB1 | lymphadenitis:BAG6,HLA-C,HLA-DRB1 | lymph node disease:BAG6,HLA-C,HLA-DRB1 | leprosy:HLA-DRB1 | Graves' disease:HLA-C,HLA-DQA1,HLA-DRB1,TAP2 | sarcoidosis:HLA-DQA1,HLA-DRB1,HSPA1L | hypersensitivity reaction type IV disease:HLA-DQA1,HLA-DRB1,HSPA1L | hepatitis:HLA-C,HLA-DQA1,HLA-DRB1,NCR3 | autoimmune disease of endocrine system:HLA-C,HLA-DQA1,HLA-DRB1,TAP2 …	antigen processing and presentation of exogenous peptide antigen:HLA-C,HLA-DOB,HLA-DQA1,HLA-DRA,HLA-DRB1,TAP2 | antigen processing and presentation of exogenous antigen:HLA-C,HLA-DOB,HLA-DQA1,HLA-DRA,HLA-DRB1,TAP2 | antigen processing and presentation of peptide antigen:HLA-C,HLA-DOB,HLA-DQA1,HLA-DRA,HLA-DRB1,TAP2 | adaptive immune response:C4A,C4B,HLA-C,HLA-DOB,HLA-DQA1,HLA-DRA,HLA-DRB1,TAP2 | a…	OHP17_all	23.5799	0.0283312	0.0109966	0.0109966	3549	0.207014	0.0733059	2.32393	0.527944	0.27229	0.0609216	5.1057	0	0.14454	0.133544	0.554242	0.621125	0.676493	0.0665023	23.5799	0	0.598908	0.0748041	14.9275	0	0.786273	0.122784	9.82045	0	0.124458
rs115050884:31756802:T:A	6	31756802	6p21.33	A	T	0.986835	FALSE	rs145827824:32103749:C:G	0.692767	VARS (0 kb, intron/Intron/MODIFIER | nc-RNA/Non coding transcript/MODIFIER | near_gene/Downstream gene/MODIFIER | near_gene/Upstream gene/MODIFIER); LSM2 (8.4 kb); VWA7 (12 kb); HSPA1L (21 kb); SAPCD1-AS1 (23 kb); MSH5-SAPCD1 (24 kb); SAPCD1 (24 kb); MSH5 (24 kb); HSPA1A (26 kb); RNU6-850P (32 kb); HSPA1B (39 kb); C6orf48 (46 kb); SNORD48 (46 kb); SNORD52 (48 kb); CLIC1 (49 kb)	11.12	0.927 Bioavailable testosterone levels // 0.863 Aspartate aminotransferase levels in low alcohol consumption // 0.458 Neurological blood protein biomarker levels // 0.411 Heel bone mineral density // 0.346 Blood protein levels	- | ABCF1 | ABHD16A | AGER | AIF1 | APOM | ATF6B | ATP6V1G2 | ATP6V1G2-DDX39B | BAG6 | BAT4 | BRD2 | BTNL2 | C2 | C4A | C4B | C4B_2 | C6orf10 | C6orf25 | C6orf48 | CCHCR1 | CFB | CLIC1 | CSNK2B | CUTA | DDAH2 | DDR1 | DDX39B | DHX16 | DOM3Z | DXO | EHMT2 | FLOT1 | GPANK1 | GPSM3 | GTF2H4 | HCG22 | HCG23 | HCG27 | HCG4B | HCG4P3 | HCP5 | HLA-A | HLA-B | HLA-C | HLA-DOA | HLA-DOB | HLA-DPA1 | HLA-D…	ABP1 | BTN3A2 | CCDC69 | EXOC1 | FLOT1 | HLA-DRB1 | HLA-DRB4 | HLA-DRB5 | HLA-F | HLA-H | HLA-V | IER3 | LIMS1 | MDC1 | NHP2 | PARP2 | PSMB9 | SSRP1 | TAP2 | TMEM154 | TRAV12-1 | TUBB | ZAP70 | ZNF672 | ZNRD1	Systemic lupus erythematosus:HLA-DOB,HLA-DQA1,HLA-DRA,HLA-DRB1 | Antigen processing and presentation:HLA-C,HLA-DOB,HLA-DQA1,HLA-DRA,HLA-DRB1,HLA-E,HSPA1A,HSPA1B,HSPA1L,TAP2 | Allograft rejection:HLA-C,HLA-DOB,HLA-DQA1,HLA-DRA,HLA-DRB1,HLA-E | Type I diabetes mellitus:HLA-C,HLA-DOB,HLA-DQA1,HLA-DRA,HLA-DRB1,HLA-E,LTA | Graft-versus-host disease:HLA-C,HLA-DOB,HLA-DQA1,HLA-DRA,HLA-DRB1,HLA-E | Autoi…	Translocation of ZAP-70 to Immunological synapse:HLA-DQA1,HLA-DRA,HLA-DRB1 | Interferon gamma signaling:HLA-C,HLA-DQA1,HLA-DRA,HLA-DRB1,HLA-E | Generation of second messenger molecules:HLA-DQA1,HLA-DRA,HLA-DRB1 | Phosphorylation of CD3 and TCR zeta chains:HLA-DQA1,HLA-DRA,HLA-DRB1 | PD-1 signaling:HLA-DQA1,HLA-DRA,HLA-DRB1 | Interferon Signaling:HLA-C,HLA-DQA1,HLA-DRA,HLA-DRB1,HLA-E,PSMB8 | RNA P…	Kawasaki disease:ABHD16A,BAG6,HLA-C,HLA-DRB1,HLA-E,PRRC2A | lymphadenitis:ABHD16A,BAG6,HLA-C,HLA-DRB1,HLA-E,PRRC2A | lymph node disease:ABHD16A,BAG6,HLA-C,HLA-DRB1,HLA-E,PRRC2A | leprosy:HLA-DRB1,LTA | Graves' disease:HLA-C,HLA-DQA1,HLA-DRB1,TAP2 | sarcoidosis:DDR1,HLA-DQA1,HLA-DRB1,HSPA1L,LTA | hypersensitivity reaction type IV disease:DDR1,HLA-DQA1,HLA-DRB1,HSPA1L,LTA | hepatitis:HLA-C,HLA-DQA1…	antigen processing and presentation of exogenous peptide antigen:HLA-C,HLA-DOB,HLA-DQA1,HLA-DRA,HLA-DRB1,HLA-E,PSMB8,TAP2 | antigen processing and presentation of exogenous antigen:HLA-C,HLA-DOB,HLA-DQA1,HLA-DRA,HLA-DRB1,HLA-E,PSMB8,TAP2 | antigen processing and presentation of peptide antigen:HLA-C,HLA-DOB,HLA-DQA1,HLA-DRA,HLA-DRB1,HLA-E,PSMB8,TAP2 | adaptive immune response:HLA-C,HLA-DOB,HLA-DQ…	OHP17_all	23.3225	0.0280189	0.0164022	0.0164022	3549	0.145935	0.0561771	2.02765	0.512983	0.197072	0.0464161	4.66184	0	0.100906	0.102923	0.485605	0.232763	0.512637	0.0506828	23.3225	0	0.496085	0.0568366	17.5874	0	0.529531	0.0937857	7.78602	0	0.123054
rs149492184:32020717:G:T	6	32020717	6p21.33	T	G	0.985842	FALSE	rs145827824:32103749:C:G	1	TNXB (0 kb, exon/Missense/MODERATE); CYP21A2 (11 kb); C4B-AS1 (17 kb); C4B (18 kb); RNA5SP206 (26 kb); STK19P (39 kb); TNXA (40 kb); CYP21A1P (44 kb); ATF6B (45 kb); C4A-AS1 (49 kb)	14.88	0.781 Bioavailable testosterone levels // 0.597 Aspartate aminotransferase levels in low alcohol consumption	- | ABCF1 | ABHD16A | AGER | AIF1 | APOM | ATF6B | ATP6V1G2 | ATP6V1G2-DDX39B | BAG6 | BRD2 | C2 | C4A | C4B | C4B_2 | C6orf10 | C6orf25 | C6orf48 | CCHCR1 | CFB | CLIC1 | CSNK2B | CUTA | CYP21A2 | DDAH2 | DDR1 | DDX39B | DOM3Z | DXO | EHMT2 | FLOT1 | GPANK1 | GPSM3 | GTF2H4 | HCG22 | HCG23 | HCG27 | HCP5 | HLA-B | HLA-C | HLA-DOA | HLA-DOB | HLA-DPA1 | HLA-DQA1 | HLA-DQA2 | HLA-DQB1 | HLA-DQB1-A…	ABP1 | BTN3A2 | CCDC69 | FLOT1 | HLA-DRB1 | HLA-DRB4 | HLA-DRB5 | HLA-F | HLA-H | HLA-V | IER3 | LIMS1 | LINC00243 | MDC1 | NHP2 | PPP1R11 | TRAV12-1 | VARS2 | ZNRD1	Systemic lupus erythematosus:C4B,HLA-DOB,HLA-DQA1,HLA-DQA2,HLA-DRA,HLA-DRB1,HLA-DRB5 | Antigen processing and presentation:HLA-C,HLA-DOB,HLA-DQA1,HLA-DQA2,HLA-DRA,HLA-DRB1,HLA-DRB5,HSPA1A,HSPA1B,HSPA1L,TAP2 | Allograft rejection:HLA-C,HLA-DOB,HLA-DQA1,HLA-DQA2,HLA-DRA,HLA-DRB1,HLA-DRB5 | Type I diabetes mellitus:HLA-C,HLA-DOB,HLA-DQA1,HLA-DQA2,HLA-DRA,HLA-DRB1,HLA-DRB5 | Graft-versus-host disease…	Translocation of ZAP-70 to Immunological synapse:HLA-DQA1,HLA-DQA2,HLA-DRA,HLA-DRB1,HLA-DRB5 | Interferon gamma signaling:HLA-C,HLA-DQA1,HLA-DQA2,HLA-DRA,HLA-DRB1,HLA-DRB5 | Generation of second messenger molecules:HLA-DQA1,HLA-DQA2,HLA-DRA,HLA-DRB1,HLA-DRB5 | Phosphorylation of CD3 and TCR zeta chains:HLA-DQA1,HLA-DQA2,HLA-DRA,HLA-DRB1,HLA-DRB5 | PD-1 signaling:HLA-DQA1,HLA-DQA2,HLA-DRA,HLA-DRB1…	Kawasaki disease:BAG6,HLA-C,HLA-DRB1,PRRC2A | lymphadenitis:BAG6,HLA-C,HLA-DRB1,PRRC2A | lymph node disease:BAG6,HLA-C,HLA-DRB1,PRRC2A | leprosy:HLA-DRB1 | Graves' disease:HLA-C,HLA-DQA1,HLA-DRB1,TAP2 | sarcoidosis:DDR1,HLA-DQA1,HLA-DRB1,HSPA1L | hypersensitivity reaction type IV disease:DDR1,HLA-DQA1,HLA-DRB1,HSPA1L | hepatitis:HLA-C,HLA-DQA1,HLA-DRB1,NCR3,PSMB9 | autoimmune disease of endocrine…	antigen processing and presentation of exogenous peptide antigen:HLA-C,HLA-DOB,HLA-DQA1,HLA-DQA2,HLA-DRA,HLA-DRB1,HLA-DRB5,PSMB8,PSMB9,TAP2 | antigen processing and presentation of exogenous antigen:HLA-C,HLA-DOB,HLA-DQA1,HLA-DQA2,HLA-DRA,HLA-DRB1,HLA-DRB5,PSMB8,PSMB9,TAP2 | antigen processing and presentation of peptide antigen:HLA-C,HLA-DOB,HLA-DQA1,HLA-DQA2,HLA-DRA,HLA-DRB1,HLA-DRB5,PSMB8,PSMB…	OHP17_all	23.1853	0.0278523	0.011075	0.011075	3549	0.186878	0.0684163	2.20032	0	0.220053	0.0549981	4.20033	0.249016	0.114709	0.125631	0.442241	0.561508	0.614065	0.0608972	23.1853	0.648233	0.526254	0.0670582	14.373	0	0.747735	0.116017	9.9388	0.30475	0.122221
rs144692407:32032101:C:T	6	32032101	6p21.33	T	C	0.988173	FALSE	rs145827824:32103749:C:G	1	TNXB (0 kb, intron/Intron/MODIFIER); RNA5SP206 (14 kb); CYP21A2 (23 kb); C4B-AS1 (28 kb); C4B (29 kb); ATF6B (34 kb)	1.346	0.781 Bioavailable testosterone levels // 0.597 Aspartate aminotransferase levels in low alcohol consumption	- | ABCF1 | ABHD16A | AGER | AIF1 | APOM | ATF6B | ATP6V1G2 | ATP6V1G2-DDX39B | BAG6 | BRD2 | C2 | C4A | C4B | C4B_2 | C6orf10 | C6orf25 | C6orf48 | CCHCR1 | CFB | CLIC1 | CSNK2B | CUTA | CYP21A2 | DDAH2 | DDR1 | DDX39B | DOM3Z | DXO | EHMT2 | FLOT1 | GPANK1 | GPSM3 | GTF2H4 | HCG22 | HCG23 | HCG27 | HCP5 | HLA-B | HLA-C | HLA-DOA | HLA-DOB | HLA-DPA1 | HLA-DQA1 | HLA-DQA2 | HLA-DQB1 | HLA-DQB1-A…	ABP1 | BTN3A2 | CCDC69 | FLOT1 | HLA-DRB1 | HLA-DRB4 | HLA-DRB5 | HLA-F | HLA-H | HLA-V | IER3 | LIMS1 | LINC00243 | MDC1 | NHP2 | PPP1R11 | TRAV12-1 | VARS2 | ZNRD1	Systemic lupus erythematosus:C4B,HLA-DOB,HLA-DQA1,HLA-DQA2,HLA-DRA,HLA-DRB1,HLA-DRB5 | Antigen processing and presentation:HLA-C,HLA-DOB,HLA-DQA1,HLA-DQA2,HLA-DRA,HLA-DRB1,HLA-DRB5,HSPA1A,HSPA1B,HSPA1L,TAP2 | Allograft rejection:HLA-C,HLA-DOB,HLA-DQA1,HLA-DQA2,HLA-DRA,HLA-DRB1,HLA-DRB5 | Type I diabetes mellitus:HLA-C,HLA-DOB,HLA-DQA1,HLA-DQA2,HLA-DRA,HLA-DRB1,HLA-DRB5 | Graft-versus-host disease…	Translocation of ZAP-70 to Immunological synapse:HLA-DQA1,HLA-DQA2,HLA-DRA,HLA-DRB1,HLA-DRB5 | Interferon gamma signaling:HLA-C,HLA-DQA1,HLA-DQA2,HLA-DRA,HLA-DRB1,HLA-DRB5 | Generation of second messenger molecules:HLA-DQA1,HLA-DQA2,HLA-DRA,HLA-DRB1,HLA-DRB5 | Phosphorylation of CD3 and TCR zeta chains:HLA-DQA1,HLA-DQA2,HLA-DRA,HLA-DRB1,HLA-DRB5 | PD-1 signaling:HLA-DQA1,HLA-DQA2,HLA-DRA,HLA-DRB1…	Kawasaki disease:BAG6,HLA-C,HLA-DRB1,PRRC2A | lymphadenitis:BAG6,HLA-C,HLA-DRB1,PRRC2A | lymph node disease:BAG6,HLA-C,HLA-DRB1,PRRC2A | leprosy:HLA-DRB1 | Graves' disease:HLA-C,HLA-DQA1,HLA-DRB1,TAP2 | sarcoidosis:DDR1,HLA-DQA1,HLA-DRB1,HSPA1L | hypersensitivity reaction type IV disease:DDR1,HLA-DQA1,HLA-DRB1,HSPA1L | hepatitis:HLA-C,HLA-DQA1,HLA-DRB1,NCR3,PSMB9 | autoimmune disease of endocrine…	antigen processing and presentation of exogenous peptide antigen:HLA-C,HLA-DOB,HLA-DQA1,HLA-DQA2,HLA-DRA,HLA-DRB1,HLA-DRB5,PSMB8,PSMB9,TAP2 | antigen processing and presentation of exogenous antigen:HLA-C,HLA-DOB,HLA-DQA1,HLA-DQA2,HLA-DRA,HLA-DRB1,HLA-DRB5,PSMB8,PSMB9,TAP2 | antigen processing and presentation of peptide antigen:HLA-C,HLA-DOB,HLA-DQA1,HLA-DQA2,HLA-DRA,HLA-DRB1,HLA-DRB5,PSMB8,PSMB…	OHP17_all	23.1274	0.0277818	0.011047	0.011047	3549	0.186773	0.0684239	2.1979	0	0.219797	0.055008	4.19047	0.245561	0.114756	0.125641	0.442429	0.56171	0.613402	0.0609107	23.1274	0.641407	0.525171	0.0670726	14.3113	0	0.747792	0.116046	9.93565	0.296522	0.122395
rs150056434:32033451:C:T	6	32033451	6p21.33	T	C	0.988756	FALSE	rs145827824:32103749:C:G	1	TNXB (0 kb, intron/Intron/MODIFIER); RNA5SP206 (13 kb); CYP21A2 (24 kb); C4B-AS1 (29 kb); C4B (30 kb); ATF6B (33 kb)	2.661	0.781 Bioavailable testosterone levels // 0.597 Aspartate aminotransferase levels in low alcohol consumption	- | ABCF1 | ABHD16A | AGER | AIF1 | APOM | ATF6B | ATP6V1G2 | ATP6V1G2-DDX39B | BAG6 | BRD2 | C2 | C4A | C4B | C4B_2 | C6orf10 | C6orf25 | C6orf48 | CCHCR1 | CFB | CLIC1 | CSNK2B | CUTA | CYP21A2 | DDAH2 | DDR1 | DDX39B | DOM3Z | DXO | EHMT2 | FLOT1 | GPANK1 | GPSM3 | GTF2H4 | HCG22 | HCG23 | HCG27 | HCP5 | HLA-B | HLA-C | HLA-DOA | HLA-DOB | HLA-DPA1 | HLA-DQA1 | HLA-DQA2 | HLA-DQB1 | HLA-DQB1-A…	ABP1 | BTN3A2 | CCDC69 | FLOT1 | HLA-DRB1 | HLA-DRB4 | HLA-DRB5 | HLA-F | HLA-H | HLA-V | IER3 | LIMS1 | LINC00243 | MDC1 | NHP2 | PPP1R11 | TRAV12-1 | VARS2 | ZNRD1	Systemic lupus erythematosus:C4B,HLA-DOB,HLA-DQA1,HLA-DQA2,HLA-DRA,HLA-DRB1,HLA-DRB5 | Antigen processing and presentation:HLA-C,HLA-DOB,HLA-DQA1,HLA-DQA2,HLA-DRA,HLA-DRB1,HLA-DRB5,HSPA1A,HSPA1B,HSPA1L,TAP2 | Allograft rejection:HLA-C,HLA-DOB,HLA-DQA1,HLA-DQA2,HLA-DRA,HLA-DRB1,HLA-DRB5 | Type I diabetes mellitus:HLA-C,HLA-DOB,HLA-DQA1,HLA-DQA2,HLA-DRA,HLA-DRB1,HLA-DRB5 | Graft-versus-host disease…	Translocation of ZAP-70 to Immunological synapse:HLA-DQA1,HLA-DQA2,HLA-DRA,HLA-DRB1,HLA-DRB5 | Interferon gamma signaling:HLA-C,HLA-DQA1,HLA-DQA2,HLA-DRA,HLA-DRB1,HLA-DRB5 | Generation of second messenger molecules:HLA-DQA1,HLA-DQA2,HLA-DRA,HLA-DRB1,HLA-DRB5 | Phosphorylation of CD3 and TCR zeta chains:HLA-DQA1,HLA-DQA2,HLA-DRA,HLA-DRB1,HLA-DRB5 | PD-1 signaling:HLA-DQA1,HLA-DQA2,HLA-DRA,HLA-DRB1…	Kawasaki disease:BAG6,HLA-C,HLA-DRB1,PRRC2A | lymphadenitis:BAG6,HLA-C,HLA-DRB1,PRRC2A | lymph node disease:BAG6,HLA-C,HLA-DRB1,PRRC2A | leprosy:HLA-DRB1 | Graves' disease:HLA-C,HLA-DQA1,HLA-DRB1,TAP2 | sarcoidosis:DDR1,HLA-DQA1,HLA-DRB1,HSPA1L | hypersensitivity reaction type IV disease:DDR1,HLA-DQA1,HLA-DRB1,HSPA1L | hepatitis:HLA-C,HLA-DQA1,HLA-DRB1,NCR3,PSMB9 | autoimmune disease of endocrine…	antigen processing and presentation of exogenous peptide antigen:HLA-C,HLA-DOB,HLA-DQA1,HLA-DQA2,HLA-DRA,HLA-DRB1,HLA-DRB5,PSMB8,PSMB9,TAP2 | antigen processing and presentation of exogenous antigen:HLA-C,HLA-DOB,HLA-DQA1,HLA-DQA2,HLA-DRA,HLA-DRB1,HLA-DRB5,PSMB8,PSMB9,TAP2 | antigen processing and presentation of peptide antigen:HLA-C,HLA-DOB,HLA-DQA1,HLA-DQA2,HLA-DRA,HLA-DRB1,HLA-DRB5,PSMB8,PSMB…	OHP17_all	23.1147	0.0277664	0.0110422	0.0110422	3549	0.186745	0.0684248	2.19731	0	0.219739	0.0550101	4.18825	0.244928	0.114756	0.125641	0.44243	0.561779	0.613248	0.0609128	23.1147	0.640023	0.524962	0.0670756	14.2993	0	0.747723	0.116047	9.93366	0.294865	0.122405
rs116496054:32053343:C:T	6	32053343	6p21.33	T	C	0.986756	FALSE	rs145827824:32103749:C:G	1	TNXB (0 kb, intron/Intron/MODIFIER); RNA5SP206 (6.9 kb); ATF6B (13 kb); FKBPL (43 kb); CYP21A2 (44 kb); C4B-AS1 (49 kb)	5.245	0.781 Bioavailable testosterone levels // 0.597 Aspartate aminotransferase levels in low alcohol consumption	- | ABCF1 | ABHD16A | AGER | AIF1 | APOM | ATF6B | ATP6V1G2 | ATP6V1G2-DDX39B | BAG6 | BRD2 | C2 | C4A | C4B | C4B_2 | C6orf10 | C6orf25 | C6orf48 | CCHCR1 | CFB | CLIC1 | CSNK2B | CUTA | CYP21A2 | DDAH2 | DDR1 | DDX39B | DOM3Z | DXO | EHMT2 | FLOT1 | GPANK1 | GPSM3 | GTF2H4 | HCG22 | HCG23 | HCG27 | HCP5 | HLA-B | HLA-C | HLA-DOA | HLA-DOB | HLA-DPA1 | HLA-DQA1 | HLA-DQA2 | HLA-DQB1 | HLA-DQB1-A…	ABP1 | BTN3A2 | CCDC69 | FLOT1 | HLA-DRB1 | HLA-DRB4 | HLA-DRB5 | HLA-F | HLA-H | HLA-V | IER3 | LIMS1 | LINC00243 | MDC1 | NHP2 | PPP1R11 | TRAV12-1 | VARS2 | ZNRD1	Systemic lupus erythematosus:HLA-DOB,HLA-DQA1,HLA-DQA2,HLA-DRA,HLA-DRB1,HLA-DRB5 | Antigen processing and presentation:HLA-C,HLA-DOB,HLA-DQA1,HLA-DQA2,HLA-DRA,HLA-DRB1,HLA-DRB5,HSPA1A,HSPA1B,HSPA1L,TAP2 | Allograft rejection:HLA-C,HLA-DOB,HLA-DQA1,HLA-DQA2,HLA-DRA,HLA-DRB1,HLA-DRB5 | Type I diabetes mellitus:HLA-C,HLA-DOB,HLA-DQA1,HLA-DQA2,HLA-DRA,HLA-DRB1,HLA-DRB5 | Graft-versus-host disease:HLA…	Translocation of ZAP-70 to Immunological synapse:HLA-DQA1,HLA-DQA2,HLA-DRA,HLA-DRB1,HLA-DRB5 | Interferon gamma signaling:HLA-C,HLA-DQA1,HLA-DQA2,HLA-DRA,HLA-DRB1,HLA-DRB5 | Generation of second messenger molecules:HLA-DQA1,HLA-DQA2,HLA-DRA,HLA-DRB1,HLA-DRB5 | Phosphorylation of CD3 and TCR zeta chains:HLA-DQA1,HLA-DQA2,HLA-DRA,HLA-DRB1,HLA-DRB5 | PD-1 signaling:HLA-DQA1,HLA-DQA2,HLA-DRA,HLA-DRB1…	Kawasaki disease:BAG6,HLA-C,HLA-DRB1,PRRC2A | lymphadenitis:BAG6,HLA-C,HLA-DRB1,PRRC2A | lymph node disease:BAG6,HLA-C,HLA-DRB1,PRRC2A | leprosy:HLA-DRB1 | Graves' disease:HLA-C,HLA-DQA1,HLA-DRB1,TAP2 | sarcoidosis:DDR1,HLA-DQA1,HLA-DRB1,HSPA1L | hypersensitivity reaction type IV disease:DDR1,HLA-DQA1,HLA-DRB1,HSPA1L | hepatitis:HLA-C,HLA-DQA1,HLA-DRB1,NCR3,PSMB9 | autoimmune disease of endocrine…	antigen processing and presentation of exogenous peptide antigen:HLA-C,HLA-DOB,HLA-DQA1,HLA-DQA2,HLA-DRA,HLA-DRB1,HLA-DRB5,PSMB8,PSMB9,TAP2 | antigen processing and presentation of exogenous antigen:HLA-C,HLA-DOB,HLA-DQA1,HLA-DQA2,HLA-DRA,HLA-DRB1,HLA-DRB5,PSMB8,PSMB9,TAP2 | antigen processing and presentation of peptide antigen:HLA-C,HLA-DOB,HLA-DQA1,HLA-DQA2,HLA-DRA,HLA-DRB1,HLA-DRB5,PSMB8,PSMB…	OHP17_all	23.1061	0.027756	0.0110398	0.0110398	3549	0.186826	0.0684263	2.19878	0	0.219755	0.0550113	4.18862	0.250109	0.114596	0.125663	0.441528	0.562056	0.61325	0.0609247	23.1061	0.63866	0.524885	0.0670799	14.2937	0	0.748065	0.1161	9.9337	0.286936	0.123031
rs115612382:32036822:C:T	6	32036822	6p21.33	T	C	0.989921	FALSE	rs145827824:32103749:C:G	1	TNXB (0 kb, exon/Synonymous/LOW); RNA5SP206 (9.5 kb); CYP21A2 (27 kb); ATF6B (29 kb); C4B-AS1 (33 kb); C4B (34 kb)	13.84	0.781 Bioavailable testosterone levels // 0.597 Aspartate aminotransferase levels in low alcohol consumption	- | ABCF1 | ABHD16A | AGER | AIF1 | APOM | ATF6B | ATP6V1G2 | ATP6V1G2-DDX39B | BAG6 | BRD2 | C2 | C4A | C4B | C4B_2 | C6orf10 | C6orf25 | C6orf48 | CCHCR1 | CFB | CLIC1 | CSNK2B | CUTA | CYP21A2 | DDAH2 | DDR1 | DDX39B | DOM3Z | DXO | EHMT2 | FLOT1 | GPANK1 | GPSM3 | GTF2H4 | HCG22 | HCG23 | HCG27 | HCP5 | HLA-B | HLA-C | HLA-DOA | HLA-DOB | HLA-DPA1 | HLA-DQA1 | HLA-DQA2 | HLA-DQB1 | HLA-DQB1-A…	ABP1 | BTN3A2 | CCDC69 | FLOT1 | HLA-DRB1 | HLA-DRB4 | HLA-DRB5 | HLA-F | HLA-H | HLA-V | IER3 | LIMS1 | LINC00243 | MDC1 | NHP2 | PPP1R11 | TRAV12-1 | VARS2 | ZNRD1	Systemic lupus erythematosus:C4B,HLA-DOB,HLA-DQA1,HLA-DQA2,HLA-DRA,HLA-DRB1,HLA-DRB5 | Antigen processing and presentation:HLA-C,HLA-DOB,HLA-DQA1,HLA-DQA2,HLA-DRA,HLA-DRB1,HLA-DRB5,HSPA1A,HSPA1B,HSPA1L,TAP2 | Allograft rejection:HLA-C,HLA-DOB,HLA-DQA1,HLA-DQA2,HLA-DRA,HLA-DRB1,HLA-DRB5 | Type I diabetes mellitus:HLA-C,HLA-DOB,HLA-DQA1,HLA-DQA2,HLA-DRA,HLA-DRB1,HLA-DRB5 | Graft-versus-host disease…	Translocation of ZAP-70 to Immunological synapse:HLA-DQA1,HLA-DQA2,HLA-DRA,HLA-DRB1,HLA-DRB5 | Interferon gamma signaling:HLA-C,HLA-DQA1,HLA-DQA2,HLA-DRA,HLA-DRB1,HLA-DRB5 | Generation of second messenger molecules:HLA-DQA1,HLA-DQA2,HLA-DRA,HLA-DRB1,HLA-DRB5 | Phosphorylation of CD3 and TCR zeta chains:HLA-DQA1,HLA-DQA2,HLA-DRA,HLA-DRB1,HLA-DRB5 | PD-1 signaling:HLA-DQA1,HLA-DQA2,HLA-DRA,HLA-DRB1…	Kawasaki disease:BAG6,HLA-C,HLA-DRB1,PRRC2A | lymphadenitis:BAG6,HLA-C,HLA-DRB1,PRRC2A | lymph node disease:BAG6,HLA-C,HLA-DRB1,PRRC2A | leprosy:HLA-DRB1 | Graves' disease:HLA-C,HLA-DQA1,HLA-DRB1,TAP2 | sarcoidosis:DDR1,HLA-DQA1,HLA-DRB1,HSPA1L | hypersensitivity reaction type IV disease:DDR1,HLA-DQA1,HLA-DRB1,HSPA1L | hepatitis:HLA-C,HLA-DQA1,HLA-DRB1,NCR3,PSMB9 | autoimmune disease of endocrine…	antigen processing and presentation of exogenous peptide antigen:HLA-C,HLA-DOB,HLA-DQA1,HLA-DQA2,HLA-DRA,HLA-DRB1,HLA-DRB5,PSMB8,PSMB9,TAP2 | antigen processing and presentation of exogenous antigen:HLA-C,HLA-DOB,HLA-DQA1,HLA-DQA2,HLA-DRA,HLA-DRB1,HLA-DRB5,PSMB8,PSMB9,TAP2 | antigen processing and presentation of peptide antigen:HLA-C,HLA-DOB,HLA-DQA1,HLA-DQA2,HLA-DRA,HLA-DRB1,HLA-DRB5,PSMB8,PSMB…	OHP17_all	23.0949	0.0277424	0.011033	0.011033	3549	0.186693	0.0684263	2.19622	0	0.219644	0.0550126	4.18474	0.243383	0.11476	0.125644	0.442437	0.56182	0.613017	0.060917	23.0949	0.63759	0.524598	0.0670799	14.2789	0	0.747721	0.116057	9.93206	0.291931	0.122449
rs151169511:32043310:G:A	6	32043310	6p21.33	A	G	0.990504	FALSE	rs145827824:32103749:C:G	1	TNXB (0 kb, intron/Intron/MODIFIER); RNA5SP206 (3 kb, near_gene/Downstream gene/MODIFIER); ATF6B (23 kb); CYP21A2 (34 kb); C4B-AS1 (39 kb); C4B (40 kb)	2.963	0.781 Bioavailable testosterone levels // 0.597 Aspartate aminotransferase levels in low alcohol consumption	- | ABCF1 | ABHD16A | AGER | AIF1 | APOM | ATF6B | ATP6V1G2 | ATP6V1G2-DDX39B | BAG6 | BRD2 | C2 | C4A | C4B | C4B_2 | C6orf10 | C6orf25 | C6orf48 | CCHCR1 | CFB | CLIC1 | CSNK2B | CUTA | CYP21A2 | DDAH2 | DDR1 | DDX39B | DOM3Z | DXO | EHMT2 | FLOT1 | GPANK1 | GPSM3 | GTF2H4 | HCG22 | HCG23 | HCG27 | HCP5 | HLA-B | HLA-C | HLA-DOA | HLA-DOB | HLA-DPA1 | HLA-DQA1 | HLA-DQA2 | HLA-DQB1 | HLA-DQB1-A…	ABP1 | BTN3A2 | CCDC69 | FLOT1 | HLA-DRB1 | HLA-DRB4 | HLA-DRB5 | HLA-F | HLA-H | HLA-V | IER3 | LIMS1 | LINC00243 | MDC1 | NHP2 | PPP1R11 | TRAV12-1 | VARS2 | ZNRD1	Systemic lupus erythematosus:C4B,HLA-DOB,HLA-DQA1,HLA-DQA2,HLA-DRA,HLA-DRB1,HLA-DRB5 | Antigen processing and presentation:HLA-C,HLA-DOB,HLA-DQA1,HLA-DQA2,HLA-DRA,HLA-DRB1,HLA-DRB5,HSPA1A,HSPA1B,HSPA1L,TAP2 | Allograft rejection:HLA-C,HLA-DOB,HLA-DQA1,HLA-DQA2,HLA-DRA,HLA-DRB1,HLA-DRB5 | Type I diabetes mellitus:HLA-C,HLA-DOB,HLA-DQA1,HLA-DQA2,HLA-DRA,HLA-DRB1,HLA-DRB5 | Graft-versus-host disease…	Translocation of ZAP-70 to Immunological synapse:HLA-DQA1,HLA-DQA2,HLA-DRA,HLA-DRB1,HLA-DRB5 | Interferon gamma signaling:HLA-C,HLA-DQA1,HLA-DQA2,HLA-DRA,HLA-DRB1,HLA-DRB5 | Generation of second messenger molecules:HLA-DQA1,HLA-DQA2,HLA-DRA,HLA-DRB1,HLA-DRB5 | Phosphorylation of CD3 and TCR zeta chains:HLA-DQA1,HLA-DQA2,HLA-DRA,HLA-DRB1,HLA-DRB5 | PD-1 signaling:HLA-DQA1,HLA-DQA2,HLA-DRA,HLA-DRB1…	Kawasaki disease:BAG6,HLA-C,HLA-DRB1,PRRC2A | lymphadenitis:BAG6,HLA-C,HLA-DRB1,PRRC2A | lymph node disease:BAG6,HLA-C,HLA-DRB1,PRRC2A | leprosy:HLA-DRB1 | Graves' disease:HLA-C,HLA-DQA1,HLA-DRB1,TAP2 | sarcoidosis:DDR1,HLA-DQA1,HLA-DRB1,HSPA1L | hypersensitivity reaction type IV disease:DDR1,HLA-DQA1,HLA-DRB1,HSPA1L | hepatitis:HLA-C,HLA-DQA1,HLA-DRB1,NCR3,PSMB9 | autoimmune disease of endocrine…	antigen processing and presentation of exogenous peptide antigen:HLA-C,HLA-DOB,HLA-DQA1,HLA-DQA2,HLA-DRA,HLA-DRB1,HLA-DRB5,PSMB8,PSMB9,TAP2 | antigen processing and presentation of exogenous antigen:HLA-C,HLA-DOB,HLA-DQA1,HLA-DQA2,HLA-DRA,HLA-DRB1,HLA-DRB5,PSMB8,PSMB9,TAP2 | antigen processing and presentation of peptide antigen:HLA-C,HLA-DOB,HLA-DQA1,HLA-DQA2,HLA-DRA,HLA-DRB1,HLA-DRB5,PSMB8,PSMB…	OHP17_all	23.0762	0.0277197	0.0110241	0.0110241	3549	0.186652	0.0684269	2.19541	0	0.21956	0.0550142	4.18176	0.241928	0.114776	0.125645	0.442513	0.561855	0.612787	0.0609197	23.0762	0.6352	0.524228	0.0670826	14.2588	0	0.747737	0.116064	9.93143	0.289553	0.122499
6:32045898:AAG:A	6	32045898	6p21.33	A	AAG	0.991087	FALSE	rs145827824:32103749:C:G	1	TNXB (0 kb); RNA5SP206 (0.39 kb); ATF6B (20 kb); CYP21A2 (36 kb); C4B-AS1 (42 kb); C4B (43 kb)		0.781 Bioavailable testosterone levels // 0.597 Aspartate aminotransferase levels in low alcohol consumption	- | ABCF1 | ABHD16A | AGER | AIF1 | APOM | ATF6B | ATP6V1G2 | ATP6V1G2-DDX39B | BAG6 | BRD2 | C2 | C4A | C4B | C4B_2 | C6orf10 | C6orf25 | C6orf48 | CCHCR1 | CFB | CLIC1 | CSNK2B | CYP21A2 | DDAH2 | DDR1 | DDX39B | DOM3Z | DXO | EHMT2 | FLOT1 | GPANK1 | GPSM3 | GTF2H4 | HCG22 | HCG23 | HCG27 | HCP5 | HLA-B | HLA-C | HLA-DOA | HLA-DOB | HLA-DQA1 | HLA-DQA2 | HLA-DQB1 | HLA-DQB1-AS1 | HLA-DQB2 | HL…	ABP1 | BTN3A2 | CCDC69 | FLOT1 | HLA-DQA1 | HLA-DRB1 | HLA-DRB4 | HLA-DRB5 | HLA-F | HLA-H | HLA-V | IER3 | LIMS1 | LINC00243 | NHP2 | PPP1R11 | TRAV12-1 | VARS2 | ZNRD1	Systemic lupus erythematosus:C4B,HLA-DOB,HLA-DQA1,HLA-DQA2,HLA-DRA,HLA-DRB1 | Antigen processing and presentation:HLA-C,HLA-DOB,HLA-DQA1,HLA-DQA2,HLA-DRA,HLA-DRB1,HSPA1A,HSPA1B,HSPA1L,TAP2 | Allograft rejection:HLA-C,HLA-DOB,HLA-DQA1,HLA-DQA2,HLA-DRA,HLA-DRB1 | Type I diabetes mellitus:HLA-C,HLA-DOB,HLA-DQA1,HLA-DQA2,HLA-DRA,HLA-DRB1 | Graft-versus-host disease:HLA-C,HLA-DOB,HLA-DQA1,HLA-DQA2,HLA…	Translocation of ZAP-70 to Immunological synapse:HLA-DQA1,HLA-DQA2,HLA-DRA,HLA-DRB1 | Interferon gamma signaling:HLA-C,HLA-DQA1,HLA-DQA2,HLA-DRA,HLA-DRB1 | Generation of second messenger molecules:HLA-DQA1,HLA-DQA2,HLA-DRA,HLA-DRB1 | Phosphorylation of CD3 and TCR zeta chains:HLA-DQA1,HLA-DQA2,HLA-DRA,HLA-DRB1 | PD-1 signaling:HLA-DQA1,HLA-DQA2,HLA-DRA,HLA-DRB1 | Interferon Signaling:HLA-C,HLA-DQ…	Kawasaki disease:BAG6,HLA-C,HLA-DRB1,PRRC2A | lymphadenitis:BAG6,HLA-C,HLA-DRB1,PRRC2A | lymph node disease:BAG6,HLA-C,HLA-DRB1,PRRC2A | leprosy:HLA-DRB1 | Graves' disease:HLA-C,HLA-DQA1,HLA-DRB1,TAP2 | sarcoidosis:DDR1,HLA-DQA1,HLA-DRB1,HSPA1L | hypersensitivity reaction type IV disease:DDR1,HLA-DQA1,HLA-DRB1,HSPA1L | hepatitis:HLA-C,HLA-DQA1,HLA-DRB1,NCR3,PSMB9 | autoimmune disease of endocrine…	antigen processing and presentation of exogenous peptide antigen:HLA-C,HLA-DOB,HLA-DQA1,HLA-DQA2,HLA-DRA,HLA-DRB1,PSMB8,PSMB9,TAP2 | antigen processing and presentation of exogenous antigen:HLA-C,HLA-DOB,HLA-DQA1,HLA-DQA2,HLA-DRA,HLA-DRB1,PSMB8,PSMB9,TAP2 | antigen processing and presentation of peptide antigen:HLA-C,HLA-DOB,HLA-DQA1,HLA-DQA2,HLA-DRA,HLA-DRB1,PSMB8,PSMB9,TAP2 | adaptive immune re…	OHP17_all	23.068	0.0277098	0.0110213	0.0110213	3549	0.186634	0.068427	2.19506	0	0.219521	0.0550149	4.18036	0.241396	0.114771	0.125645	0.442489	0.56183	0.612685	0.0609208	23.068	0.634343	0.524106	0.0670837	14.252	0	0.747672	0.116066	9.92949	0.288484	0.122514
rs149995364:32052216:C:T	6	32052216	6p21.33	T	C	0.991669	FALSE	rs145827824:32103749:C:G	1	TNXB (0 kb, exon/Missense/MODERATE); RNA5SP206 (5.8 kb); ATF6B (14 kb); CYP21A2 (43 kb); FKBPL (44 kb); C4B-AS1 (48 kb); C4B (49 kb)	16.46	0.781 Bioavailable testosterone levels // 0.597 Aspartate aminotransferase levels in low alcohol consumption	- | ABCF1 | ABHD16A | AGER | AIF1 | APOM | ATF6B | ATP6V1G2 | ATP6V1G2-DDX39B | BAG6 | BRD2 | C2 | C4A | C4B | C4B_2 | C6orf10 | C6orf25 | C6orf48 | CCHCR1 | CFB | CLIC1 | CSNK2B | CUTA | CYP21A2 | DDAH2 | DDR1 | DDX39B | DOM3Z | DXO | EHMT2 | FLOT1 | GPANK1 | GPSM3 | GTF2H4 | HCG22 | HCG23 | HCG27 | HCP5 | HLA-B | HLA-C | HLA-DOA | HLA-DOB | HLA-DPA1 | HLA-DQA1 | HLA-DQA2 | HLA-DQB1 | HLA-DQB1-A…	ABP1 | BTN3A2 | CCDC69 | FLOT1 | HLA-DRB1 | HLA-DRB4 | HLA-DRB5 | HLA-F | HLA-H | HLA-V | IER3 | LIMS1 | LINC00243 | MDC1 | NHP2 | PPP1R11 | TRAV12-1 | VARS2 | ZNRD1	Systemic lupus erythematosus:C4B,HLA-DOB,HLA-DQA1,HLA-DQA2,HLA-DRA,HLA-DRB1,HLA-DRB5 | Antigen processing and presentation:HLA-C,HLA-DOB,HLA-DQA1,HLA-DQA2,HLA-DRA,HLA-DRB1,HLA-DRB5,HSPA1A,HSPA1B,HSPA1L,TAP2 | Allograft rejection:HLA-C,HLA-DOB,HLA-DQA1,HLA-DQA2,HLA-DRA,HLA-DRB1,HLA-DRB5 | Type I diabetes mellitus:HLA-C,HLA-DOB,HLA-DQA1,HLA-DQA2,HLA-DRA,HLA-DRB1,HLA-DRB5 | Graft-versus-host disease…	Translocation of ZAP-70 to Immunological synapse:HLA-DQA1,HLA-DQA2,HLA-DRA,HLA-DRB1,HLA-DRB5 | Interferon gamma signaling:HLA-C,HLA-DQA1,HLA-DQA2,HLA-DRA,HLA-DRB1,HLA-DRB5 | Generation of second messenger molecules:HLA-DQA1,HLA-DQA2,HLA-DRA,HLA-DRB1,HLA-DRB5 | Phosphorylation of CD3 and TCR zeta chains:HLA-DQA1,HLA-DQA2,HLA-DRA,HLA-DRB1,HLA-DRB5 | PD-1 signaling:HLA-DQA1,HLA-DQA2,HLA-DRA,HLA-DRB1…	Kawasaki disease:BAG6,HLA-C,HLA-DRB1,PRRC2A | lymphadenitis:BAG6,HLA-C,HLA-DRB1,PRRC2A | lymph node disease:BAG6,HLA-C,HLA-DRB1,PRRC2A | leprosy:HLA-DRB1 | Graves' disease:HLA-C,HLA-DQA1,HLA-DRB1,TAP2 | sarcoidosis:DDR1,HLA-DQA1,HLA-DRB1,HSPA1L | hypersensitivity reaction type IV disease:DDR1,HLA-DQA1,HLA-DRB1,HSPA1L | hepatitis:HLA-C,HLA-DQA1,HLA-DRB1,NCR3,PSMB9 | autoimmune disease of endocrine…	antigen processing and presentation of exogenous peptide antigen:HLA-C,HLA-DOB,HLA-DQA1,HLA-DQA2,HLA-DRA,HLA-DRB1,HLA-DRB5,PSMB8,PSMB9,TAP2 | antigen processing and presentation of exogenous antigen:HLA-C,HLA-DOB,HLA-DQA1,HLA-DQA2,HLA-DRA,HLA-DRB1,HLA-DRB5,PSMB8,PSMB9,TAP2 | antigen processing and presentation of peptide antigen:HLA-C,HLA-DOB,HLA-DQA1,HLA-DQA2,HLA-DRA,HLA-DRB1,HLA-DRB5,PSMB8,PSMB…	OHP17_all	23.0593	0.0276992	0.0110156	0.0110156	3549	0.186597	0.0684302	2.19418	0	0.21947	0.0550163	4.17846	0.240535	0.114733	0.125658	0.442238	0.561631	0.612631	0.0609274	23.0593	0.633121	0.523937	0.0670861	14.2424	0	0.747863	0.116093	9.92982	0.285982	0.122537
rs185068125:32055942:C:G	6	32055942	6p21.33	G	C	0.991669	FALSE	rs145827824:32103749:C:G	1	TNXB (0 kb, intron/Intron/MODIFIER); RNA5SP206 (9.5 kb); ATF6B (10 kb); FKBPL (41 kb); CYP21A2 (46 kb)	1.462	0.781 Bioavailable testosterone levels // 0.597 Aspartate aminotransferase levels in low alcohol consumption	- | ABCF1 | ABHD16A | AGER | AIF1 | APOM | ATF6B | ATP6V1G2 | ATP6V1G2-DDX39B | BAG6 | BRD2 | C2 | C4A | C4B | C4B_2 | C6orf10 | C6orf25 | C6orf48 | CCHCR1 | CFB | CLIC1 | CSNK2B | CUTA | CYP21A2 | DDAH2 | DDR1 | DDX39B | DOM3Z | DXO | EHMT2 | FLOT1 | GPANK1 | GPSM3 | GTF2H4 | HCG22 | HCG23 | HCG27 | HCP5 | HLA-B | HLA-C | HLA-DOA | HLA-DOB | HLA-DPA1 | HLA-DQA1 | HLA-DQA2 | HLA-DQB1 | HLA-DQB1-A…	ABP1 | BTN3A2 | CCDC69 | FLOT1 | HLA-DRB1 | HLA-DRB4 | HLA-DRB5 | HLA-F | HLA-H | HLA-V | IER3 | LIMS1 | LINC00243 | MDC1 | NHP2 | PPP1R11 | TRAV12-1 | VARS2 | ZNRD1	Systemic lupus erythematosus:HLA-DOB,HLA-DQA1,HLA-DQA2,HLA-DRA,HLA-DRB1,HLA-DRB5 | Antigen processing and presentation:HLA-C,HLA-DOB,HLA-DQA1,HLA-DQA2,HLA-DRA,HLA-DRB1,HLA-DRB5,HSPA1A,HSPA1B,HSPA1L,TAP2 | Allograft rejection:HLA-C,HLA-DOB,HLA-DQA1,HLA-DQA2,HLA-DRA,HLA-DRB1,HLA-DRB5 | Type I diabetes mellitus:HLA-C,HLA-DOB,HLA-DQA1,HLA-DQA2,HLA-DRA,HLA-DRB1,HLA-DRB5 | Graft-versus-host disease:HLA…	Translocation of ZAP-70 to Immunological synapse:HLA-DQA1,HLA-DQA2,HLA-DRA,HLA-DRB1,HLA-DRB5 | Interferon gamma signaling:HLA-C,HLA-DQA1,HLA-DQA2,HLA-DRA,HLA-DRB1,HLA-DRB5 | Generation of second messenger molecules:HLA-DQA1,HLA-DQA2,HLA-DRA,HLA-DRB1,HLA-DRB5 | Phosphorylation of CD3 and TCR zeta chains:HLA-DQA1,HLA-DQA2,HLA-DRA,HLA-DRB1,HLA-DRB5 | PD-1 signaling:HLA-DQA1,HLA-DQA2,HLA-DRA,HLA-DRB1…	Kawasaki disease:BAG6,HLA-C,HLA-DRB1,PRRC2A | lymphadenitis:BAG6,HLA-C,HLA-DRB1,PRRC2A | lymph node disease:BAG6,HLA-C,HLA-DRB1,PRRC2A | leprosy:HLA-DRB1 | Graves' disease:HLA-C,HLA-DQA1,HLA-DRB1,TAP2 | sarcoidosis:DDR1,HLA-DQA1,HLA-DRB1,HSPA1L | hypersensitivity reaction type IV disease:DDR1,HLA-DQA1,HLA-DRB1,HSPA1L | hepatitis:HLA-C,HLA-DQA1,HLA-DRB1,NCR3,PSMB9 | autoimmune disease of endocrine…	antigen processing and presentation of exogenous peptide antigen:HLA-C,HLA-DOB,HLA-DQA1,HLA-DQA2,HLA-DRA,HLA-DRB1,HLA-DRB5,PSMB8,PSMB9,TAP2 | antigen processing and presentation of exogenous antigen:HLA-C,HLA-DOB,HLA-DQA1,HLA-DQA2,HLA-DRA,HLA-DRB1,HLA-DRB5,PSMB8,PSMB9,TAP2 | antigen processing and presentation of peptide antigen:HLA-C,HLA-DOB,HLA-DQA1,HLA-DQA2,HLA-DRA,HLA-DRB1,HLA-DRB5,PSMB8,PSMB…	OHP17_all	23.0588	0.0276986	0.0110147	0.0110147	3549	0.186587	0.0684328	2.19385	0	0.219461	0.0550172	4.17807	0.240693	0.114699	0.125667	0.442024	0.56153	0.612667	0.0609317	23.0588	0.632937	0.523931	0.0670874	14.2416	0	0.748009	0.116112	9.93047	0.28455	0.122532
rs368048229:32055699:G:T	6	32055699	6p21.33	T	G	0.991669	FALSE	rs145827824:32103749:C:G	1	TNXB (0 kb, intron/Intron/MODIFIER); RNA5SP206 (9.3 kb); ATF6B (10 kb); FKBPL (41 kb); CYP21A2 (46 kb)		0.781 Bioavailable testosterone levels // 0.597 Aspartate aminotransferase levels in low alcohol consumption	- | ABCF1 | ABHD16A | AGER | AIF1 | APOM | ATF6B | ATP6V1G2 | ATP6V1G2-DDX39B | BAG6 | BRD2 | C2 | C4A | C4B | C4B_2 | C6orf10 | C6orf25 | C6orf48 | CCHCR1 | CFB | CLIC1 | CSNK2B | CYP21A2 | DDAH2 | DDR1 | DDX39B | DOM3Z | DXO | EHMT2 | FLOT1 | GPANK1 | GPSM3 | GTF2H4 | HCG22 | HCG23 | HCG27 | HCP5 | HLA-B | HLA-C | HLA-DOA | HLA-DOB | HLA-DQA1 | HLA-DQA2 | HLA-DQB1 | HLA-DQB1-AS1 | HLA-DQB2 | HL…	ABP1 | BTN3A2 | CCDC69 | FLOT1 | HLA-DQA1 | HLA-DRB1 | HLA-DRB4 | HLA-DRB5 | HLA-F | HLA-H | HLA-V | IER3 | LIMS1 | LINC00243 | NHP2 | PPP1R11 | TRAV12-1 | VARS2 | ZNRD1	Systemic lupus erythematosus:HLA-DOB,HLA-DQA1,HLA-DQA2,HLA-DRA,HLA-DRB1 | Antigen processing and presentation:HLA-C,HLA-DOB,HLA-DQA1,HLA-DQA2,HLA-DRA,HLA-DRB1,HSPA1A,HSPA1B,HSPA1L,TAP2 | Allograft rejection:HLA-C,HLA-DOB,HLA-DQA1,HLA-DQA2,HLA-DRA,HLA-DRB1 | Type I diabetes mellitus:HLA-C,HLA-DOB,HLA-DQA1,HLA-DQA2,HLA-DRA,HLA-DRB1 | Graft-versus-host disease:HLA-C,HLA-DOB,HLA-DQA1,HLA-DQA2,HLA-DRA…	Translocation of ZAP-70 to Immunological synapse:HLA-DQA1,HLA-DQA2,HLA-DRA,HLA-DRB1 | Interferon gamma signaling:HLA-C,HLA-DQA1,HLA-DQA2,HLA-DRA,HLA-DRB1 | Generation of second messenger molecules:HLA-DQA1,HLA-DQA2,HLA-DRA,HLA-DRB1 | Phosphorylation of CD3 and TCR zeta chains:HLA-DQA1,HLA-DQA2,HLA-DRA,HLA-DRB1 | PD-1 signaling:HLA-DQA1,HLA-DQA2,HLA-DRA,HLA-DRB1 | Interferon Signaling:HLA-C,HLA-DQ…	Kawasaki disease:BAG6,HLA-C,HLA-DRB1,PRRC2A | lymphadenitis:BAG6,HLA-C,HLA-DRB1,PRRC2A | lymph node disease:BAG6,HLA-C,HLA-DRB1,PRRC2A | leprosy:HLA-DRB1 | Graves' disease:HLA-C,HLA-DQA1,HLA-DRB1,TAP2 | sarcoidosis:DDR1,HLA-DQA1,HLA-DRB1,HSPA1L | hypersensitivity reaction type IV disease:DDR1,HLA-DQA1,HLA-DRB1,HSPA1L | hepatitis:HLA-C,HLA-DQA1,HLA-DRB1,NCR3,PSMB9 | autoimmune disease of endocrine…	antigen processing and presentation of exogenous peptide antigen:HLA-C,HLA-DOB,HLA-DQA1,HLA-DQA2,HLA-DRA,HLA-DRB1,PSMB8,PSMB9,TAP2 | antigen processing and presentation of exogenous antigen:HLA-C,HLA-DOB,HLA-DQA1,HLA-DQA2,HLA-DRA,HLA-DRB1,PSMB8,PSMB9,TAP2 | antigen processing and presentation of peptide antigen:HLA-C,HLA-DOB,HLA-DQA1,HLA-DQA2,HLA-DRA,HLA-DRB1,PSMB8,PSMB9,TAP2 | adaptive immune re…	OHP17_all	23.0588	0.0276986	0.0110148	0.0110148	3549	0.186589	0.0684323	2.1939	0	0.219461	0.0550172	4.17807	0.240693	0.114704	0.125665	0.442059	0.561546	0.612661	0.0609311	23.0588	0.632971	0.523931	0.0670874	14.2416	0	0.747985	0.116109	9.93035	0.284783	0.122532
rs377704711:32054987:T:C	6	32054987	6p21.33	C	T	0.991669	FALSE	rs145827824:32103749:C:G	1	TNXB (0 kb, intron/Intron/MODIFIER); RNA5SP206 (8.6 kb); ATF6B (11 kb); FKBPL (41 kb); CYP21A2 (46 kb)		0.781 Bioavailable testosterone levels // 0.597 Aspartate aminotransferase levels in low alcohol consumption	- | ABCF1 | ABHD16A | AGER | AIF1 | APOM | ATF6B | ATP6V1G2 | ATP6V1G2-DDX39B | BAG6 | BRD2 | C2 | C4A | C4B | C4B_2 | C6orf10 | C6orf25 | C6orf48 | CCHCR1 | CFB | CLIC1 | CSNK2B | CYP21A2 | DDAH2 | DDR1 | DDX39B | DOM3Z | DXO | EHMT2 | FLOT1 | GPANK1 | GPSM3 | GTF2H4 | HCG22 | HCG23 | HCG27 | HCP5 | HLA-B | HLA-C | HLA-DOA | HLA-DOB | HLA-DQA1 | HLA-DQA2 | HLA-DQB1 | HLA-DQB1-AS1 | HLA-DQB2 | HL…	ABP1 | BTN3A2 | CCDC69 | FLOT1 | HLA-DQA1 | HLA-DRB1 | HLA-DRB4 | HLA-DRB5 | HLA-F | HLA-H | HLA-V | IER3 | LIMS1 | LINC00243 | NHP2 | PPP1R11 | TRAV12-1 | VARS2 | ZNRD1	Systemic lupus erythematosus:HLA-DOB,HLA-DQA1,HLA-DQA2,HLA-DRA,HLA-DRB1 | Antigen processing and presentation:HLA-C,HLA-DOB,HLA-DQA1,HLA-DQA2,HLA-DRA,HLA-DRB1,HSPA1A,HSPA1B,HSPA1L,TAP2 | Allograft rejection:HLA-C,HLA-DOB,HLA-DQA1,HLA-DQA2,HLA-DRA,HLA-DRB1 | Type I diabetes mellitus:HLA-C,HLA-DOB,HLA-DQA1,HLA-DQA2,HLA-DRA,HLA-DRB1 | Graft-versus-host disease:HLA-C,HLA-DOB,HLA-DQA1,HLA-DQA2,HLA-DRA…	Translocation of ZAP-70 to Immunological synapse:HLA-DQA1,HLA-DQA2,HLA-DRA,HLA-DRB1 | Interferon gamma signaling:HLA-C,HLA-DQA1,HLA-DQA2,HLA-DRA,HLA-DRB1 | Generation of second messenger molecules:HLA-DQA1,HLA-DQA2,HLA-DRA,HLA-DRB1 | Phosphorylation of CD3 and TCR zeta chains:HLA-DQA1,HLA-DQA2,HLA-DRA,HLA-DRB1 | PD-1 signaling:HLA-DQA1,HLA-DQA2,HLA-DRA,HLA-DRB1 | Interferon Signaling:HLA-C,HLA-DQ…	Kawasaki disease:BAG6,HLA-C,HLA-DRB1,PRRC2A | lymphadenitis:BAG6,HLA-C,HLA-DRB1,PRRC2A | lymph node disease:BAG6,HLA-C,HLA-DRB1,PRRC2A | leprosy:HLA-DRB1 | Graves' disease:HLA-C,HLA-DQA1,HLA-DRB1,TAP2 | sarcoidosis:DDR1,HLA-DQA1,HLA-DRB1,HSPA1L | hypersensitivity reaction type IV disease:DDR1,HLA-DQA1,HLA-DRB1,HSPA1L | hepatitis:HLA-C,HLA-DQA1,HLA-DRB1,NCR3,PSMB9 | autoimmune disease of endocrine…	antigen processing and presentation of exogenous peptide antigen:HLA-C,HLA-DOB,HLA-DQA1,HLA-DQA2,HLA-DRA,HLA-DRB1,PSMB8,PSMB9,TAP2 | antigen processing and presentation of exogenous antigen:HLA-C,HLA-DOB,HLA-DQA1,HLA-DQA2,HLA-DRA,HLA-DRB1,PSMB8,PSMB9,TAP2 | antigen processing and presentation of peptide antigen:HLA-C,HLA-DOB,HLA-DQA1,HLA-DQA2,HLA-DRA,HLA-DRB1,PSMB8,PSMB9,TAP2 | adaptive immune re…	OHP17_all	23.0587	0.0276985	0.011015	0.011015	3549	0.186589	0.0684321	2.19393	0	0.219461	0.0550172	4.17807	0.240693	0.114709	0.125664	0.442092	0.561562	0.612654	0.0609305	23.0587	0.633005	0.523931	0.0670874	14.2416	0	0.74796	0.116106	9.93024	0.28503	0.122532
rs149228301:32061665:A:G	6	32061665	6p21.33	G	A	0.991669	FALSE	rs145827824:32103749:C:G	1	TNXB (0 kb, intron/Intron/MODIFIER | near_gene/Downstream gene/MODIFIER); ATF6B (4.3 kb, near_gene/Downstream gene/MODIFIER); RNA5SP206 (15 kb); FKBPL (35 kb)	13.22	0.781 Bioavailable testosterone levels // 0.597 Aspartate aminotransferase levels in low alcohol consumption	- | ABCF1 | ABHD16A | AGER | AIF1 | APOM | ATF6B | ATP6V1G2 | ATP6V1G2-DDX39B | BAG6 | BRD2 | C2 | C4A | C4B | C4B_2 | C6orf10 | C6orf25 | C6orf48 | CCHCR1 | CFB | CLIC1 | CSNK2B | CUTA | CYP21A2 | DDAH2 | DDR1 | DDX39B | DOM3Z | DXO | EHMT2 | FLOT1 | GPANK1 | GPSM3 | GTF2H4 | HCG22 | HCG23 | HCG27 | HCP5 | HLA-B | HLA-C | HLA-DOA | HLA-DOB | HLA-DPA1 | HLA-DQA1 | HLA-DQA2 | HLA-DQB1 | HLA-DQB1-A…	ABP1 | BTN3A2 | CCDC69 | FLOT1 | HLA-DRB1 | HLA-DRB4 | HLA-DRB5 | HLA-F | HLA-H | HLA-V | IER3 | LIMS1 | LINC00243 | MDC1 | NHP2 | PPP1R11 | TRAV12-1 | VARS2 | ZNRD1	Systemic lupus erythematosus:HLA-DOB,HLA-DQA1,HLA-DQA2,HLA-DRA,HLA-DRB1,HLA-DRB5 | Antigen processing and presentation:HLA-C,HLA-DOB,HLA-DQA1,HLA-DQA2,HLA-DRA,HLA-DRB1,HLA-DRB5,HSPA1A,HSPA1B,HSPA1L,TAP2 | Allograft rejection:HLA-C,HLA-DOB,HLA-DQA1,HLA-DQA2,HLA-DRA,HLA-DRB1,HLA-DRB5 | Type I diabetes mellitus:HLA-C,HLA-DOB,HLA-DQA1,HLA-DQA2,HLA-DRA,HLA-DRB1,HLA-DRB5 | Graft-versus-host disease:HLA…	Translocation of ZAP-70 to Immunological synapse:HLA-DQA1,HLA-DQA2,HLA-DRA,HLA-DRB1,HLA-DRB5 | Interferon gamma signaling:HLA-C,HLA-DQA1,HLA-DQA2,HLA-DRA,HLA-DRB1,HLA-DRB5 | Generation of second messenger molecules:HLA-DQA1,HLA-DQA2,HLA-DRA,HLA-DRB1,HLA-DRB5 | Phosphorylation of CD3 and TCR zeta chains:HLA-DQA1,HLA-DQA2,HLA-DRA,HLA-DRB1,HLA-DRB5 | PD-1 signaling:HLA-DQA1,HLA-DQA2,HLA-DRA,HLA-DRB1…	Kawasaki disease:BAG6,HLA-C,HLA-DRB1,PRRC2A | lymphadenitis:BAG6,HLA-C,HLA-DRB1,PRRC2A | lymph node disease:BAG6,HLA-C,HLA-DRB1,PRRC2A | leprosy:HLA-DRB1 | Graves' disease:HLA-C,HLA-DQA1,HLA-DRB1,TAP2 | sarcoidosis:DDR1,HLA-DQA1,HLA-DRB1,HSPA1L | hypersensitivity reaction type IV disease:DDR1,HLA-DQA1,HLA-DRB1,HSPA1L | hepatitis:HLA-C,HLA-DQA1,HLA-DRB1,NCR3,PSMB9 | autoimmune disease of endocrine…	antigen processing and presentation of exogenous peptide antigen:HLA-C,HLA-DOB,HLA-DQA1,HLA-DQA2,HLA-DRA,HLA-DRB1,HLA-DRB5,PSMB8,PSMB9,TAP2 | antigen processing and presentation of exogenous antigen:HLA-C,HLA-DOB,HLA-DQA1,HLA-DQA2,HLA-DRA,HLA-DRB1,HLA-DRB5,PSMB8,PSMB9,TAP2 | antigen processing and presentation of peptide antigen:HLA-C,HLA-DOB,HLA-DQA1,HLA-DQA2,HLA-DRA,HLA-DRB1,HLA-DRB5,PSMB8,PSMB…	OHP17_all	23.0577	0.0276972	0.0110131	0.0110131	3549	0.186571	0.0684366	2.19333	0	0.219446	0.0550191	4.1773	0.240999	0.114646	0.12568	0.4417	0.561373	0.612719	0.0609384	23.0577	0.632675	0.523918	0.0670899	14.2399	0	0.748224	0.116139	9.93137	0.282432	0.122522
rs143631267:32066635:T:A	6	32066635	6p21.33	A	T	0.991087	FALSE	rs145827824:32103749:C:G	1	TNXB (0 kb, intron/Intron/MODIFIER | nc-RNA/Non coding transcript/MODIFIER); ATF6B (0 kb, intron/Intron/MODIFIER | nc-RNA/Non coding transcript/MODIFIER); RNA5SP206 (20 kb); FKBPL (30 kb); PRRT1 (50 kb)	7.469	0.781 Bioavailable testosterone levels // 0.597 Aspartate aminotransferase levels in low alcohol consumption	- | ABCF1 | ABHD16A | AGER | AIF1 | APOM | ATF6B | ATP6V1G2 | ATP6V1G2-DDX39B | BAG6 | BRD2 | C2 | C4A | C4B | C4B_2 | C6orf10 | C6orf25 | C6orf48 | CCHCR1 | CFB | CLIC1 | CSNK2B | CUTA | CYP21A2 | DDAH2 | DDR1 | DDX39B | DOM3Z | DXO | EHMT2 | FLOT1 | GPANK1 | GPSM3 | GTF2H4 | HCG22 | HCG23 | HCG27 | HCP5 | HLA-B | HLA-C | HLA-DOA | HLA-DOB | HLA-DPA1 | HLA-DQA1 | HLA-DQA2 | HLA-DQB1 | HLA-DQB1-A…	ABP1 | BTN3A2 | CCDC69 | FLOT1 | HLA-DRB1 | HLA-DRB4 | HLA-DRB5 | HLA-F | HLA-H | HLA-V | IER3 | LIMS1 | LINC00243 | MDC1 | NHP2 | PPP1R11 | TRAV12-1 | VARS2 | ZNRD1	Systemic lupus erythematosus:HLA-DOB,HLA-DQA1,HLA-DQA2,HLA-DRA,HLA-DRB1,HLA-DRB5 | Antigen processing and presentation:HLA-C,HLA-DOB,HLA-DQA1,HLA-DQA2,HLA-DRA,HLA-DRB1,HLA-DRB5,HSPA1A,HSPA1B,HSPA1L,TAP2 | Allograft rejection:HLA-C,HLA-DOB,HLA-DQA1,HLA-DQA2,HLA-DRA,HLA-DRB1,HLA-DRB5 | Type I diabetes mellitus:HLA-C,HLA-DOB,HLA-DQA1,HLA-DQA2,HLA-DRA,HLA-DRB1,HLA-DRB5 | Graft-versus-host disease:HLA…	Translocation of ZAP-70 to Immunological synapse:HLA-DQA1,HLA-DQA2,HLA-DRA,HLA-DRB1,HLA-DRB5 | Interferon gamma signaling:HLA-C,HLA-DQA1,HLA-DQA2,HLA-DRA,HLA-DRB1,HLA-DRB5 | Generation of second messenger molecules:HLA-DQA1,HLA-DQA2,HLA-DRA,HLA-DRB1,HLA-DRB5 | Phosphorylation of CD3 and TCR zeta chains:HLA-DQA1,HLA-DQA2,HLA-DRA,HLA-DRB1,HLA-DRB5 | PD-1 signaling:HLA-DQA1,HLA-DQA2,HLA-DRA,HLA-DRB1…	Kawasaki disease:BAG6,HLA-C,HLA-DRB1,PRRC2A | lymphadenitis:BAG6,HLA-C,HLA-DRB1,PRRC2A | lymph node disease:BAG6,HLA-C,HLA-DRB1,PRRC2A | leprosy:HLA-DRB1 | Graves' disease:HLA-C,HLA-DQA1,HLA-DRB1,TAP2 | sarcoidosis:DDR1,HLA-DQA1,HLA-DRB1,HSPA1L | hypersensitivity reaction type IV disease:DDR1,HLA-DQA1,HLA-DRB1,HSPA1L | hepatitis:HLA-C,HLA-DQA1,HLA-DRB1,NCR3,PSMB9 | autoimmune disease of endocrine…	antigen processing and presentation of exogenous peptide antigen:HLA-C,HLA-DOB,HLA-DQA1,HLA-DQA2,HLA-DRA,HLA-DRB1,HLA-DRB5,PSMB8,PSMB9,TAP2 | antigen processing and presentation of exogenous antigen:HLA-C,HLA-DOB,HLA-DQA1,HLA-DQA2,HLA-DRA,HLA-DRB1,HLA-DRB5,PSMB8,PSMB9,TAP2 | antigen processing and presentation of peptide antigen:HLA-C,HLA-DOB,HLA-DQA1,HLA-DQA2,HLA-DRA,HLA-DRB1,HLA-DRB5,PSMB8,PSMB…	OHP17_all	23.0558	0.0276949	0.0110114	0.0110114	3549	0.186545	0.0684417	2.19258	0	0.219422	0.0550217	4.17615	0.241464	0.114578	0.125696	0.441281	0.561223	0.612779	0.060947	23.0558	0.63244	0.523897	0.0670936	14.2374	0	0.748485	0.116173	9.93248	0.280066	0.122509
rs144438015:32050413:A:C	6	32050413	6p21.33	C	A	0.989835	FALSE	rs145827824:32103749:C:G	1	TNXB (0 kb, intron/Intron/MODIFIER); RNA5SP206 (4 kb, near_gene/Upstream gene/MODIFIER); ATF6B (16 kb); CYP21A2 (41 kb); FKBPL (46 kb); C4B-AS1 (46 kb); C4B (47 kb)	7.765	0.781 Bioavailable testosterone levels // 0.597 Aspartate aminotransferase levels in low alcohol consumption	- | ABCF1 | ABHD16A | AGER | AIF1 | APOM | ATF6B | ATP6V1G2 | ATP6V1G2-DDX39B | BAG6 | BRD2 | C2 | C4A | C4B | C4B_2 | C6orf10 | C6orf25 | C6orf48 | CCHCR1 | CFB | CLIC1 | CSNK2B | CUTA | CYP21A2 | DDAH2 | DDR1 | DDX39B | DOM3Z | DXO | EHMT2 | FLOT1 | GPANK1 | GPSM3 | GTF2H4 | HCG22 | HCG23 | HCG27 | HCP5 | HLA-B | HLA-C | HLA-DOA | HLA-DOB | HLA-DPA1 | HLA-DQA1 | HLA-DQA2 | HLA-DQB1 | HLA-DQB1-A…	ABP1 | BTN3A2 | CCDC69 | FLOT1 | HLA-DRB1 | HLA-DRB4 | HLA-DRB5 | HLA-F | HLA-H | HLA-V | IER3 | LIMS1 | LINC00243 | MDC1 | NHP2 | PPP1R11 | TRAV12-1 | VARS2 | ZNRD1	Systemic lupus erythematosus:C4B,HLA-DOB,HLA-DQA1,HLA-DQA2,HLA-DRA,HLA-DRB1,HLA-DRB5 | Antigen processing and presentation:HLA-C,HLA-DOB,HLA-DQA1,HLA-DQA2,HLA-DRA,HLA-DRB1,HLA-DRB5,HSPA1A,HSPA1B,HSPA1L,TAP2 | Allograft rejection:HLA-C,HLA-DOB,HLA-DQA1,HLA-DQA2,HLA-DRA,HLA-DRB1,HLA-DRB5 | Type I diabetes mellitus:HLA-C,HLA-DOB,HLA-DQA1,HLA-DQA2,HLA-DRA,HLA-DRB1,HLA-DRB5 | Graft-versus-host disease…	Translocation of ZAP-70 to Immunological synapse:HLA-DQA1,HLA-DQA2,HLA-DRA,HLA-DRB1,HLA-DRB5 | Interferon gamma signaling:HLA-C,HLA-DQA1,HLA-DQA2,HLA-DRA,HLA-DRB1,HLA-DRB5 | Generation of second messenger molecules:HLA-DQA1,HLA-DQA2,HLA-DRA,HLA-DRB1,HLA-DRB5 | Phosphorylation of CD3 and TCR zeta chains:HLA-DQA1,HLA-DQA2,HLA-DRA,HLA-DRB1,HLA-DRB5 | PD-1 signaling:HLA-DQA1,HLA-DQA2,HLA-DRA,HLA-DRB1…	Kawasaki disease:BAG6,HLA-C,HLA-DRB1,PRRC2A | lymphadenitis:BAG6,HLA-C,HLA-DRB1,PRRC2A | lymph node disease:BAG6,HLA-C,HLA-DRB1,PRRC2A | leprosy:HLA-DRB1 | Graves' disease:HLA-C,HLA-DQA1,HLA-DRB1,TAP2 | sarcoidosis:DDR1,HLA-DQA1,HLA-DRB1,HSPA1L | hypersensitivity reaction type IV disease:DDR1,HLA-DQA1,HLA-DRB1,HSPA1L | hepatitis:HLA-C,HLA-DQA1,HLA-DRB1,NCR3,PSMB9 | autoimmune disease of endocrine…	antigen processing and presentation of exogenous peptide antigen:HLA-C,HLA-DOB,HLA-DQA1,HLA-DQA2,HLA-DRA,HLA-DRB1,HLA-DRB5,PSMB8,PSMB9,TAP2 | antigen processing and presentation of exogenous antigen:HLA-C,HLA-DOB,HLA-DQA1,HLA-DQA2,HLA-DRA,HLA-DRB1,HLA-DRB5,PSMB8,PSMB9,TAP2 | antigen processing and presentation of peptide antigen:HLA-C,HLA-DOB,HLA-DQA1,HLA-DQA2,HLA-DRA,HLA-DRB1,HLA-DRB5,PSMB8,PSMB…	OHP17_all	23.0359	0.0276708	0.0110045	0.0110045	3549	0.189772	0.068727	2.23972	0	0.220376	0.0550978	4.1978	0.22545	0.117767	0.126764	0.452379	0.590203	0.613019	0.0609982	23.0359	0.629658	0.524525	0.0671964	14.2284	0	0.747617	0.116143	9.91587	0.285712	0.122931
rs144703715:32082270:G:A	6	32082270	6p21.33	A	G	0.989669	FALSE	rs145827824:32103749:C:G	1	TNXB (0 kb, intron/Intron/MODIFIER); ATF6B (0 kb, intron/Intron/MODIFIER | nc-RNA/Non coding transcript/MODIFIER | near_gene/Downstream gene/MODIFIER); FKBPL (14 kb); PRRT1 (34 kb); RNA5SP206 (36 kb); PPT2 (39 kb); PPT2-EGFL8 (39 kb)	4.194	0.781 Bioavailable testosterone levels // 0.597 Aspartate aminotransferase levels in low alcohol consumption	- | ABCF1 | ABHD16A | AGER | AIF1 | APOM | ATF6B | ATP6V1G2 | BAG6 | BRD2 | C4A | C4B | C4B_2 | C6orf10 | C6orf25 | C6orf48 | CCHCR1 | CFB | CLIC1 | CSNK2B | CUTA | CYP21A2 | DDAH2 | DDR1 | DDX39B | DOM3Z | DXO | EHMT2 | FLOT1 | GPANK1 | GPSM3 | GTF2H4 | HCG22 | HCG23 | HCG27 | HCP5 | HLA-B | HLA-C | HLA-DOA | HLA-DOB | HLA-DPA1 | HLA-DQA1 | HLA-DQA2 | HLA-DQB1 | HLA-DQB1-AS1 | HLA-DQB2 | HLA-DRA…	ABP1 | CCDC69 | FLOT1 | HLA-E | HLA-F | HLA-H | HLA-V | IER3 | LIMS1 | LINC00243 | MDC1 | NHP2 | PPP1R11 | TRAV12-1 | VARS2 | ZNRD1	Systemic lupus erythematosus:HLA-DOB,HLA-DQA1,HLA-DQA2,HLA-DRA,HLA-DRB1,HLA-DRB5 | Antigen processing and presentation:HLA-C,HLA-DOB,HLA-DQA1,HLA-DQA2,HLA-DRA,HLA-DRB1,HLA-DRB5,HSPA1A,HSPA1B,HSPA1L,TAP2 | Allograft rejection:HLA-C,HLA-DOB,HLA-DQA1,HLA-DQA2,HLA-DRA,HLA-DRB1,HLA-DRB5 | Type I diabetes mellitus:HLA-C,HLA-DOB,HLA-DQA1,HLA-DQA2,HLA-DRA,HLA-DRB1,HLA-DRB5 | Graft-versus-host disease:HLA…	Translocation of ZAP-70 to Immunological synapse:HLA-DQA1,HLA-DQA2,HLA-DRA,HLA-DRB1,HLA-DRB5 | Interferon gamma signaling:HLA-C,HLA-DQA1,HLA-DQA2,HLA-DRA,HLA-DRB1,HLA-DRB5 | Generation of second messenger molecules:HLA-DQA1,HLA-DQA2,HLA-DRA,HLA-DRB1,HLA-DRB5 | Phosphorylation of CD3 and TCR zeta chains:HLA-DQA1,HLA-DQA2,HLA-DRA,HLA-DRB1,HLA-DRB5 | PD-1 signaling:HLA-DQA1,HLA-DQA2,HLA-DRA,HLA-DRB1…	Kawasaki disease:BAG6,HLA-C,HLA-DRB1,PRRC2A | lymphadenitis:BAG6,HLA-C,HLA-DRB1,PRRC2A | lymph node disease:BAG6,HLA-C,HLA-DRB1,PRRC2A | leprosy:HLA-DRB1 | Graves' disease:HLA-C,HLA-DQA1,HLA-DRB1,TAP2 | sarcoidosis:DDR1,HLA-DQA1,HLA-DRB1,HSPA1L | hypersensitivity reaction type IV disease:DDR1,HLA-DQA1,HLA-DRB1,HSPA1L | hepatitis:HLA-C,HLA-DQA1,HLA-DRB1,NCR3,PSMB9 | autoimmune disease of endocrine…	antigen processing and presentation of exogenous peptide antigen:HLA-C,HLA-DOB,HLA-DQA1,HLA-DQA2,HLA-DRA,HLA-DRB1,HLA-DRB5,PSMB8,PSMB9,TAP2 | antigen processing and presentation of exogenous antigen:HLA-C,HLA-DOB,HLA-DQA1,HLA-DQA2,HLA-DRA,HLA-DRB1,HLA-DRB5,PSMB8,PSMB9,TAP2 | antigen processing and presentation of peptide antigen:HLA-C,HLA-DOB,HLA-DQA1,HLA-DQA2,HLA-DRA,HLA-DRB1,HLA-DRB5,PSMB8,PSMB…	OHP17_all	23.0352	0.0276699	0.0109976	0.0109976	3549	0.193561	0.0684474	2.32922	0	0.219301	0.0550401	4.16969	0.242141	0.129375	0.125695	0.51806	0.637034	0.613126	0.0610098	23.0352	0.630742	0.523787	0.0671185	14.2218	0	0.750149	0.116425	9.93346	0.26492	0.122214
rs138002767:32077619:T:C	6	32077619	6p21.33	C	T	0.989669	FALSE	rs145827824:32103749:C:G	1	TNXB (0 kb, intron/Intron/MODIFIER | near_gene/Upstream gene/MODIFIER); ATF6B (0 kb, intron/Intron/MODIFIER | nc-RNA/Non coding transcript/MODIFIER); FKBPL (19 kb); RNA5SP206 (31 kb); PRRT1 (39 kb); PPT2 (44 kb); PPT2-EGFL8 (44 kb)	5.014	0.781 Bioavailable testosterone levels // 0.597 Aspartate aminotransferase levels in low alcohol consumption	- | ABCF1 | ABHD16A | AGER | AIF1 | APOM | ATF6B | ATP6V1G2 | BAG6 | BRD2 | C4A | C4B | C4B_2 | C6orf10 | C6orf25 | C6orf48 | CCHCR1 | CFB | CLIC1 | CSNK2B | CUTA | CYP21A2 | DDAH2 | DDR1 | DDX39B | DOM3Z | DXO | EHMT2 | FLOT1 | GPANK1 | GPSM3 | GTF2H4 | HCG22 | HCG23 | HCG27 | HCP5 | HLA-B | HLA-C | HLA-DOA | HLA-DOB | HLA-DPA1 | HLA-DQA1 | HLA-DQA2 | HLA-DQB1 | HLA-DQB1-AS1 | HLA-DQB2 | HLA-DRA…	ABP1 | CCDC69 | FLOT1 | HLA-E | HLA-F | HLA-H | HLA-V | IER3 | LIMS1 | LINC00243 | MDC1 | NHP2 | PPP1R11 | TRAV12-1 | VARS2 | ZNRD1	Systemic lupus erythematosus:HLA-DOB,HLA-DQA1,HLA-DQA2,HLA-DRA,HLA-DRB1,HLA-DRB5 | Antigen processing and presentation:HLA-C,HLA-DOB,HLA-DQA1,HLA-DQA2,HLA-DRA,HLA-DRB1,HLA-DRB5,HSPA1A,HSPA1B,HSPA1L,TAP2 | Allograft rejection:HLA-C,HLA-DOB,HLA-DQA1,HLA-DQA2,HLA-DRA,HLA-DRB1,HLA-DRB5 | Type I diabetes mellitus:HLA-C,HLA-DOB,HLA-DQA1,HLA-DQA2,HLA-DRA,HLA-DRB1,HLA-DRB5 | Graft-versus-host disease:HLA…	Translocation of ZAP-70 to Immunological synapse:HLA-DQA1,HLA-DQA2,HLA-DRA,HLA-DRB1,HLA-DRB5 | Interferon gamma signaling:HLA-C,HLA-DQA1,HLA-DQA2,HLA-DRA,HLA-DRB1,HLA-DRB5 | Generation of second messenger molecules:HLA-DQA1,HLA-DQA2,HLA-DRA,HLA-DRB1,HLA-DRB5 | Phosphorylation of CD3 and TCR zeta chains:HLA-DQA1,HLA-DQA2,HLA-DRA,HLA-DRB1,HLA-DRB5 | PD-1 signaling:HLA-DQA1,HLA-DQA2,HLA-DRA,HLA-DRB1…	Kawasaki disease:BAG6,HLA-C,HLA-DRB1,PRRC2A | lymphadenitis:BAG6,HLA-C,HLA-DRB1,PRRC2A | lymph node disease:BAG6,HLA-C,HLA-DRB1,PRRC2A | leprosy:HLA-DRB1 | Graves' disease:HLA-C,HLA-DQA1,HLA-DRB1,TAP2 | sarcoidosis:DDR1,HLA-DQA1,HLA-DRB1,HSPA1L | hypersensitivity reaction type IV disease:DDR1,HLA-DQA1,HLA-DRB1,HSPA1L | hepatitis:HLA-C,HLA-DQA1,HLA-DRB1,NCR3,PSMB9 | autoimmune disease of endocrine…	antigen processing and presentation of exogenous peptide antigen:HLA-C,HLA-DOB,HLA-DQA1,HLA-DQA2,HLA-DRA,HLA-DRB1,HLA-DRB5,PSMB8,PSMB9,TAP2 | antigen processing and presentation of exogenous antigen:HLA-C,HLA-DOB,HLA-DQA1,HLA-DQA2,HLA-DRA,HLA-DRB1,HLA-DRB5,PSMB8,PSMB9,TAP2 | antigen processing and presentation of peptide antigen:HLA-C,HLA-DOB,HLA-DQA1,HLA-DQA2,HLA-DRA,HLA-DRB1,HLA-DRB5,PSMB8,PSMB…	OHP17_all	23.0345	0.0276691	0.0109981	0.0109981	3549	0.193559	0.0684456	2.32928	0	0.219305	0.0550392	4.16996	0.242249	0.129369	0.125688	0.518062	0.637205	0.613083	0.0610065	23.0345	0.63072	0.523787	0.0671173	14.2223	0	0.750018	0.116412	9.93233	0.265459	0.122223
rs35185172:32090210:C:T	6	32090210	6p21.33	T	C	0.989835	FALSE	rs145827824:32103749:C:G	1	ATF6B (0 kb, intron/Intron/MODIFIER | nc-RNA/Non coding transcript/MODIFIER | near_gene/Upstream gene/MODIFIER | near_gene/Downstream gene/MODIFIER); FKBPL (6.3 kb); TNXB (7.1 kb); PRRT1 (26 kb); PPT2 (31 kb); PPT2-EGFL8 (31 kb); EGFL8 (42 kb); RNA5SP206 (44 kb); AGPAT1 (46 kb)	0.554	0.781 Bioavailable testosterone levels // 0.597 Aspartate aminotransferase levels in low alcohol consumption	- | ABCF1 | ABHD16A | AGER | AIF1 | APOM | ATF6B | ATP6V1G2 | BAG6 | BRD2 | C4A | C4B | C4B_2 | C6orf10 | C6orf25 | C6orf48 | CCHCR1 | CFB | CLIC1 | CSNK2B | CUTA | CYP21A2 | DDAH2 | DDR1 | DDX39B | DOM3Z | DXO | EHMT2 | FLOT1 | GPANK1 | GPSM3 | GTF2H4 | HCG22 | HCG23 | HCG27 | HCP5 | HLA-B | HLA-C | HLA-DOA | HLA-DOB | HLA-DPA1 | HLA-DQA1 | HLA-DQA2 | HLA-DQB1 | HLA-DQB1-AS1 | HLA-DQB2 | HLA-DRA…	ABP1 | CCDC69 | FLOT1 | HLA-E | HLA-F | HLA-H | HLA-V | IER3 | LIMS1 | LINC00243 | MDC1 | NHP2 | PPP1R11 | TRAV12-1 | VARS2 | ZNRD1	Systemic lupus erythematosus:HLA-DOB,HLA-DQA1,HLA-DQA2,HLA-DRA,HLA-DRB1,HLA-DRB5 | Antigen processing and presentation:HLA-C,HLA-DOB,HLA-DQA1,HLA-DQA2,HLA-DRA,HLA-DRB1,HLA-DRB5,HSPA1A,HSPA1B,HSPA1L,TAP2 | Allograft rejection:HLA-C,HLA-DOB,HLA-DQA1,HLA-DQA2,HLA-DRA,HLA-DRB1,HLA-DRB5 | Type I diabetes mellitus:HLA-C,HLA-DOB,HLA-DQA1,HLA-DQA2,HLA-DRA,HLA-DRB1,HLA-DRB5 | Graft-versus-host disease:HLA…	Translocation of ZAP-70 to Immunological synapse:HLA-DQA1,HLA-DQA2,HLA-DRA,HLA-DRB1,HLA-DRB5 | Interferon gamma signaling:HLA-C,HLA-DQA1,HLA-DQA2,HLA-DRA,HLA-DRB1,HLA-DRB5 | Generation of second messenger molecules:HLA-DQA1,HLA-DQA2,HLA-DRA,HLA-DRB1,HLA-DRB5 | Phosphorylation of CD3 and TCR zeta chains:HLA-DQA1,HLA-DQA2,HLA-DRA,HLA-DRB1,HLA-DRB5 | PD-1 signaling:HLA-DQA1,HLA-DQA2,HLA-DRA,HLA-DRB1…	Kawasaki disease:BAG6,HLA-C,HLA-DRB1,PRRC2A | lymphadenitis:BAG6,HLA-C,HLA-DRB1,PRRC2A | lymph node disease:BAG6,HLA-C,HLA-DRB1,PRRC2A | leprosy:HLA-DRB1 | Graves' disease:HLA-C,HLA-DQA1,HLA-DRB1,TAP2 | sarcoidosis:DDR1,HLA-DQA1,HLA-DRB1,HSPA1L | hypersensitivity reaction type IV disease:DDR1,HLA-DQA1,HLA-DRB1,HSPA1L | hepatitis:HLA-C,HLA-DQA1,HLA-DRB1,NCR3,PSMB9 | autoimmune disease of endocrine…	antigen processing and presentation of exogenous peptide antigen:HLA-C,HLA-DOB,HLA-DQA1,HLA-DQA2,HLA-DRA,HLA-DRB1,HLA-DRB5,PSMB8,PSMB9,TAP2 | antigen processing and presentation of exogenous antigen:HLA-C,HLA-DOB,HLA-DQA1,HLA-DQA2,HLA-DRA,HLA-DRB1,HLA-DRB5,PSMB8,PSMB9,TAP2 | antigen processing and presentation of peptide antigen:HLA-C,HLA-DOB,HLA-DQA1,HLA-DQA2,HLA-DRA,HLA-DRB1,HLA-DRB5,PSMB8,PSMB…	OHP17_all	22.8338	0.0274251	0.0110256	0.0110256	3549	0.186748	0.0684782	2.19457	0	0.219192	0.0550318	4.16719	0.24657	0.114084	0.125835	0.43817	0.558066	0.610424	0.0610191	22.8338	0.647542	0.519281	0.0671342	13.9853	0	0.750679	0.116459	9.94111	0.261362	0.122824
rs115341494:32089848:A:G	6	32089848	6p21.33	G	A	0.988417	FALSE	rs145827824:32103749:C:G	1	ATF6B (0 kb, intron/Intron/MODIFIER | nc-RNA/Non coding transcript/MODIFIER | near_gene/Upstream gene/MODIFIER | near_gene/Downstream gene/MODIFIER); FKBPL (6.6 kb); TNXB (6.7 kb); PRRT1 (26 kb); PPT2 (31 kb); PPT2-EGFL8 (32 kb); EGFL8 (43 kb); RNA5SP206 (43 kb); AGPAT1 (46 kb)	3.485	0.781 Bioavailable testosterone levels // 0.597 Aspartate aminotransferase levels in low alcohol consumption	- | ABCF1 | ABHD16A | AGER | AIF1 | APOM | ATF6B | ATP6V1G2 | BAG6 | BRD2 | C4A | C4B | C4B_2 | C6orf10 | C6orf25 | C6orf48 | CCHCR1 | CFB | CLIC1 | CSNK2B | CUTA | CYP21A2 | DDAH2 | DDR1 | DDX39B | DOM3Z | DXO | EHMT2 | FLOT1 | GPANK1 | GPSM3 | GTF2H4 | HCG22 | HCG23 | HCG27 | HCP5 | HLA-B | HLA-C | HLA-DOA | HLA-DOB | HLA-DPA1 | HLA-DQA1 | HLA-DQA2 | HLA-DQB1 | HLA-DQB1-AS1 | HLA-DQB2 | HLA-DRA…	ABP1 | CCDC69 | FLOT1 | HLA-E | HLA-F | HLA-H | HLA-V | IER3 | LIMS1 | LINC00243 | MDC1 | NHP2 | PPP1R11 | TRAV12-1 | VARS2 | ZNRD1	Systemic lupus erythematosus:HLA-DOB,HLA-DQA1,HLA-DQA2,HLA-DRA,HLA-DRB1,HLA-DRB5 | Antigen processing and presentation:HLA-C,HLA-DOB,HLA-DQA1,HLA-DQA2,HLA-DRA,HLA-DRB1,HLA-DRB5,HSPA1A,HSPA1B,HSPA1L,TAP2 | Allograft rejection:HLA-C,HLA-DOB,HLA-DQA1,HLA-DQA2,HLA-DRA,HLA-DRB1,HLA-DRB5 | Type I diabetes mellitus:HLA-C,HLA-DOB,HLA-DQA1,HLA-DQA2,HLA-DRA,HLA-DRB1,HLA-DRB5 | Graft-versus-host disease:HLA…	Translocation of ZAP-70 to Immunological synapse:HLA-DQA1,HLA-DQA2,HLA-DRA,HLA-DRB1,HLA-DRB5 | Interferon gamma signaling:HLA-C,HLA-DQA1,HLA-DQA2,HLA-DRA,HLA-DRB1,HLA-DRB5 | Generation of second messenger molecules:HLA-DQA1,HLA-DQA2,HLA-DRA,HLA-DRB1,HLA-DRB5 | Phosphorylation of CD3 and TCR zeta chains:HLA-DQA1,HLA-DQA2,HLA-DRA,HLA-DRB1,HLA-DRB5 | PD-1 signaling:HLA-DQA1,HLA-DQA2,HLA-DRA,HLA-DRB1…	Kawasaki disease:BAG6,HLA-C,HLA-DRB1,PRRC2A | lymphadenitis:BAG6,HLA-C,HLA-DRB1,PRRC2A | lymph node disease:BAG6,HLA-C,HLA-DRB1,PRRC2A | leprosy:HLA-DRB1 | Graves' disease:HLA-C,HLA-DQA1,HLA-DRB1,TAP2 | sarcoidosis:DDR1,HLA-DQA1,HLA-DRB1,HSPA1L | hypersensitivity reaction type IV disease:DDR1,HLA-DQA1,HLA-DRB1,HSPA1L | hepatitis:HLA-C,HLA-DQA1,HLA-DRB1,NCR3,PSMB9 | autoimmune disease of endocrine…	antigen processing and presentation of exogenous peptide antigen:HLA-C,HLA-DOB,HLA-DQA1,HLA-DQA2,HLA-DRA,HLA-DRB1,HLA-DRB5,PSMB8,PSMB9,TAP2 | antigen processing and presentation of exogenous antigen:HLA-C,HLA-DOB,HLA-DQA1,HLA-DQA2,HLA-DRA,HLA-DRB1,HLA-DRB5,PSMB8,PSMB9,TAP2 | antigen processing and presentation of peptide antigen:HLA-C,HLA-DOB,HLA-DQA1,HLA-DQA2,HLA-DRA,HLA-DRB1,HLA-DRB5,PSMB8,PSMB…	OHP17_all	22.833	0.0274243	0.0110278	0.0110278	3549	0.19394	0.0684476	2.33673	0	0.219202	0.0550328	4.16737	0.246419	0.129412	0.125713	0.518159	0.636075	0.610421	0.0610198	22.833	0.647566	0.51944	0.0671346	13.9933	0	0.750466	0.116459	9.93583	0.264019	0.122739
rs8192573:32168996:C:G	6	32168996	6p21.32	G	C	0.988417	FALSE	rs145827824:32103749:C:G	0.907247	NOTCH4 (0 kb, exon/Missense/MODERATE | nc-exon/Non coding transcript exon/MODIFIER | nc-RNA/Non coding transcript/MODIFIER | near_gene/Upstream gene/MODIFIER); GPSM3 (5.7 kb); PBX2 (11 kb); AGER (17 kb); RNF5 (17 kb); AGPAT1 (23 kb); PPT2-EGFL8 (29 kb); EGFL8 (33 kb); PPT2 (35 kb); PRRT1 (47 kb)	24.3	0.708 Bioavailable testosterone levels // 0.531 Aspartate aminotransferase levels in low alcohol consumption	- | ABCF1 | ABHD16A | AGER | AIF1 | APOM | ATF6B | ATP6V1G2 | BAG6 | BRD2 | BTNL2 | C4A | C4B | C4B_2 | C6orf10 | C6orf25 | C6orf48 | CCHCR1 | CFB | CLIC1 | CSNK2B | CUTA | CYP21A2 | DDAH2 | DDR1 | DDX39B | DOM3Z | DXO | EHMT2 | FLOT1 | GPANK1 | GPSM3 | GTF2H4 | HCG22 | HCG23 | HCG27 | HCP5 | HLA-B | HLA-C | HLA-DMB | HLA-DOA | HLA-DOB | HLA-DPA1 | HLA-DQA1 | HLA-DQA2 | HLA-DQB1 | HLA-DQB1-AS1 | …	ABP1 | FLOT1 | HLA-E | HLA-F | HLA-H | HLA-V | IER3 | LIMS1 | LINC00243 | MDC1 | PPP1R11 | VARS2 | ZNRD1	Systemic lupus erythematosus:HLA-DOB,HLA-DQA1,HLA-DQA2,HLA-DRA,HLA-DRB1,HLA-DRB5 | Antigen processing and presentation:HLA-C,HLA-DOB,HLA-DQA1,HLA-DQA2,HLA-DRA,HLA-DRB1,HLA-DRB5,HSPA1A,HSPA1B,HSPA1L,TAP2 | Allograft rejection:HLA-C,HLA-DOB,HLA-DQA1,HLA-DQA2,HLA-DRA,HLA-DRB1,HLA-DRB5 | Type I diabetes mellitus:HLA-C,HLA-DOB,HLA-DQA1,HLA-DQA2,HLA-DRA,HLA-DRB1,HLA-DRB5 | Graft-versus-host disease:HLA…	Translocation of ZAP-70 to Immunological synapse:HLA-DQA1,HLA-DQA2,HLA-DRA,HLA-DRB1,HLA-DRB5 | Interferon gamma signaling:HLA-C,HLA-DQA1,HLA-DQA2,HLA-DRA,HLA-DRB1,HLA-DRB5 | Generation of second messenger molecules:HLA-DQA1,HLA-DQA2,HLA-DRA,HLA-DRB1,HLA-DRB5 | Phosphorylation of CD3 and TCR zeta chains:HLA-DQA1,HLA-DQA2,HLA-DRA,HLA-DRB1,HLA-DRB5 | PD-1 signaling:HLA-DQA1,HLA-DQA2,HLA-DRA,HLA-DRB1…	Kawasaki disease:BAG6,HLA-C,HLA-DRB1,PRRC2A | lymphadenitis:BAG6,HLA-C,HLA-DRB1,PRRC2A | lymph node disease:BAG6,HLA-C,HLA-DRB1,PRRC2A | leprosy:HLA-DRB1 | Graves' disease:HLA-C,HLA-DQA1,HLA-DRB1,TAP2 | sarcoidosis:AGER,DDR1,HLA-DQA1,HLA-DRB1,HSPA1L | hypersensitivity reaction type IV disease:AGER,DDR1,HLA-DQA1,HLA-DRB1,HSPA1L | hepatitis:HLA-C,HLA-DQA1,HLA-DRB1,NCR3,PSMB9 | autoimmune disease of…	antigen processing and presentation of exogenous peptide antigen:HLA-C,HLA-DOB,HLA-DQA1,HLA-DQA2,HLA-DRA,HLA-DRB1,HLA-DRB5,PSMB8,PSMB9,TAP2 | antigen processing and presentation of exogenous antigen:HLA-C,HLA-DOB,HLA-DQA1,HLA-DQA2,HLA-DRA,HLA-DRB1,HLA-DRB5,PSMB8,PSMB9,TAP2 | antigen processing and presentation of peptide antigen:HLA-C,HLA-DOB,HLA-DQA1,HLA-DQA2,HLA-DRA,HLA-DRB1,HLA-DRB5,PSMB8,PSMB…	OHP17_all	22.8012	0.0273856	0.010189	0.010189	3549	0.204624	0.0698848	2.46707	0	0.220298	0.0558505	4.09697	0.351661	0.169197	0.13005	0.713876	0.393509	0.631594	0.0631821	22.8012	0.789041	0.492462	0.0684227	12.2118	0	0.867155	0.124239	11.5308	0.23512	0.131277
rs139738710:32093329:G:T	6	32093329	6p21.33	T	G	0.988417	FALSE	rs145827824:32103749:C:G	1	ATF6B (0 kb, intron/Intron/MODIFIER | nc-RNA/Non coding transcript/MODIFIER | near_gene/Downstream gene/MODIFIER); FKBPL (3.2 kb, near_gene/Downstream gene/MODIFIER); TNXB (10 kb); PRRT1 (23 kb); PPT2 (28 kb); PPT2-EGFL8 (28 kb); EGFL8 (39 kb); AGPAT1 (43 kb); RNA5SP206 (47 kb)	4.046	0.781 Bioavailable testosterone levels // 0.597 Aspartate aminotransferase levels in low alcohol consumption	- | ABCF1 | ABHD16A | AGER | AIF1 | APOM | ATF6B | ATP6V1G2 | BAG6 | BRD2 | C4A | C4B | C4B_2 | C6orf10 | C6orf25 | C6orf48 | CCHCR1 | CFB | CLIC1 | CSNK2B | CUTA | CYP21A2 | DDAH2 | DDR1 | DDX39B | DOM3Z | DXO | EHMT2 | FLOT1 | GPANK1 | GPSM3 | GTF2H4 | HCG22 | HCG23 | HCG27 | HCP5 | HLA-B | HLA-C | HLA-DOA | HLA-DOB | HLA-DPA1 | HLA-DQA1 | HLA-DQA2 | HLA-DQB1 | HLA-DQB1-AS1 | HLA-DQB2 | HLA-DRA…	ABP1 | CCDC69 | FLOT1 | HLA-E | HLA-F | HLA-H | HLA-V | IER3 | LIMS1 | LINC00243 | MDC1 | NHP2 | PPP1R11 | TRAV12-1 | VARS2 | ZNRD1	Systemic lupus erythematosus:HLA-DOB,HLA-DQA1,HLA-DQA2,HLA-DRA,HLA-DRB1,HLA-DRB5 | Antigen processing and presentation:HLA-C,HLA-DOB,HLA-DQA1,HLA-DQA2,HLA-DRA,HLA-DRB1,HLA-DRB5,HSPA1A,HSPA1B,HSPA1L,TAP2 | Allograft rejection:HLA-C,HLA-DOB,HLA-DQA1,HLA-DQA2,HLA-DRA,HLA-DRB1,HLA-DRB5 | Type I diabetes mellitus:HLA-C,HLA-DOB,HLA-DQA1,HLA-DQA2,HLA-DRA,HLA-DRB1,HLA-DRB5 | Graft-versus-host disease:HLA…	Translocation of ZAP-70 to Immunological synapse:HLA-DQA1,HLA-DQA2,HLA-DRA,HLA-DRB1,HLA-DRB5 | Interferon gamma signaling:HLA-C,HLA-DQA1,HLA-DQA2,HLA-DRA,HLA-DRB1,HLA-DRB5 | Generation of second messenger molecules:HLA-DQA1,HLA-DQA2,HLA-DRA,HLA-DRB1,HLA-DRB5 | Phosphorylation of CD3 and TCR zeta chains:HLA-DQA1,HLA-DQA2,HLA-DRA,HLA-DRB1,HLA-DRB5 | PD-1 signaling:HLA-DQA1,HLA-DQA2,HLA-DRA,HLA-DRB1…	Kawasaki disease:BAG6,HLA-C,HLA-DRB1,PRRC2A | lymphadenitis:BAG6,HLA-C,HLA-DRB1,PRRC2A | lymph node disease:BAG6,HLA-C,HLA-DRB1,PRRC2A | leprosy:HLA-DRB1 | Graves' disease:HLA-C,HLA-DQA1,HLA-DRB1,TAP2 | sarcoidosis:DDR1,HLA-DQA1,HLA-DRB1,HSPA1L | hypersensitivity reaction type IV disease:DDR1,HLA-DQA1,HLA-DRB1,HSPA1L | hepatitis:HLA-C,HLA-DQA1,HLA-DRB1,NCR3,PSMB9 | autoimmune disease of endocrine…	antigen processing and presentation of exogenous peptide antigen:HLA-C,HLA-DOB,HLA-DQA1,HLA-DQA2,HLA-DRA,HLA-DRB1,HLA-DRB5,PSMB8,PSMB9,TAP2 | antigen processing and presentation of exogenous antigen:HLA-C,HLA-DOB,HLA-DQA1,HLA-DQA2,HLA-DRA,HLA-DRB1,HLA-DRB5,PSMB8,PSMB9,TAP2 | antigen processing and presentation of peptide antigen:HLA-C,HLA-DOB,HLA-DQA1,HLA-DQA2,HLA-DRA,HLA-DRB1,HLA-DRB5,PSMB8,PSMB…	OHP17_all	22.771	0.0273488	0.0110342	0.0110342	3549	0.193969	0.0684457	2.3374	0	0.219089	0.0550246	4.1647	0.248015	0.129411	0.12572	0.518109	0.635607	0.609558	0.0610199	22.771	0.652774	0.518043	0.0671315	13.9235	0	0.750633	0.116477	9.93705	0.263226	0.122888
rs396763:31686726:T:C	6	31686726	6p21.33	C	T	0.995921	FALSE	rs145827824:32103749:C:G	0.692767	LY6G6C (0 kb, 3'utr/3 prime UTR/MODIFIER); C6orf25 (0 kb, intron/Intron/MODIFIER | nc-RNA/Non coding transcript/MODIFIER | near_gene/Upstream gene/MODIFIER); MEGT1 (1 kb, near_gene/Downstream gene/MODIFIER); LY6G6F (1.1 kb, near_gene/Downstream gene/MODIFIER); LY6G6D (1.1 kb, near_gene/Downstream gene/MODIFIER); XXbac-BPG32J3.20 (4.9 kb, near_gene/Upstream gene/MODIFIER); LY6G6E (4.9 kb, near_gen…	8.411	0.927 Bioavailable testosterone levels // 0.863 Aspartate aminotransferase levels in low alcohol consumption // 0.458 Neurological blood protein biomarker levels // 0.411 Heel bone mineral density // 0.346 Blood protein levels	- | ABCF1 | ABHD16A | AGER | AIF1 | APOM | ATF6B | ATP6V1G2 | ATP6V1G2-DDX39B | BAG6 | BAT4 | BRD2 | BTNL2 | C2 | C4A | C4B | C4B_2 | C6orf10 | C6orf25 | C6orf48 | CCHCR1 | CFB | CLIC1 | CSNK2B | CUTA | DDAH2 | DDR1 | DDX39B | DHX16 | DOM3Z | DXO | EHMT2 | FLOT1 | GPANK1 | GPSM3 | GTF2H4 | HCG22 | HCG23 | HCG27 | HCG4B | HCG4P3 | HCP5 | HLA-A | HLA-B | HLA-C | HLA-DOA | HLA-DOB | HLA-DPA1 | HLA-D…	ABP1 | BTN3A2 | CCDC69 | EXOC1 | FLOT1 | HLA-DRB1 | HLA-DRB4 | HLA-DRB5 | HLA-F | HLA-H | HLA-V | IER3 | LIMS1 | MDC1 | NHP2 | PARP2 | PSMB9 | SSRP1 | TAP2 | TMEM154 | TRAV12-1 | TUBB | ZAP70 | ZNF672 | ZNRD1	Systemic lupus erythematosus:HLA-DOB,HLA-DQA1,HLA-DRA,HLA-DRB1 | Antigen processing and presentation:HLA-C,HLA-DOB,HLA-DQA1,HLA-DRA,HLA-DRB1,HLA-E,HSPA1A,HSPA1B,HSPA1L,TAP2 | Allograft rejection:HLA-C,HLA-DOB,HLA-DQA1,HLA-DRA,HLA-DRB1,HLA-E | Type I diabetes mellitus:HLA-C,HLA-DOB,HLA-DQA1,HLA-DRA,HLA-DRB1,HLA-E,LTA | Graft-versus-host disease:HLA-C,HLA-DOB,HLA-DQA1,HLA-DRA,HLA-DRB1,HLA-E | Autoi…	Translocation of ZAP-70 to Immunological synapse:HLA-DQA1,HLA-DRA,HLA-DRB1 | Interferon gamma signaling:HLA-C,HLA-DQA1,HLA-DRA,HLA-DRB1,HLA-E | Generation of second messenger molecules:HLA-DQA1,HLA-DRA,HLA-DRB1 | Phosphorylation of CD3 and TCR zeta chains:HLA-DQA1,HLA-DRA,HLA-DRB1 | PD-1 signaling:HLA-DQA1,HLA-DRA,HLA-DRB1 | Interferon Signaling:HLA-C,HLA-DQA1,HLA-DRA,HLA-DRB1,HLA-E,PSMB8 | RNA P…	Kawasaki disease:ABHD16A,BAG6,HLA-C,HLA-DRB1,HLA-E,PRRC2A | lymphadenitis:ABHD16A,BAG6,HLA-C,HLA-DRB1,HLA-E,PRRC2A | lymph node disease:ABHD16A,BAG6,HLA-C,HLA-DRB1,HLA-E,PRRC2A | leprosy:HLA-DRB1,LTA | Graves' disease:HLA-C,HLA-DQA1,HLA-DRB1,TAP2 | sarcoidosis:DDR1,HLA-DQA1,HLA-DRB1,HSPA1L,LTA | hypersensitivity reaction type IV disease:DDR1,HLA-DQA1,HLA-DRB1,HSPA1L,LTA | hepatitis:HLA-C,HLA-DQA1…	antigen processing and presentation of exogenous peptide antigen:HLA-C,HLA-DOB,HLA-DQA1,HLA-DRA,HLA-DRB1,HLA-E,PSMB8,TAP2 | antigen processing and presentation of exogenous antigen:HLA-C,HLA-DOB,HLA-DQA1,HLA-DRA,HLA-DRB1,HLA-E,PSMB8,TAP2 | antigen processing and presentation of peptide antigen:HLA-C,HLA-DOB,HLA-DQA1,HLA-DRA,HLA-DRB1,HLA-E,PSMB8,TAP2 | adaptive immune response:HLA-C,HLA-DOB,HLA-DQ…	OHP17_all	22.6621	0.0272165	0.0149039	0.0149039	3549	0.143845	0.0588382	1.83878	0.132733	0.212888	0.0483357	4.97432	0	0.0590348	0.106815	0.236212	0	0.52557	0.0527436	22.6621	0.430036	0.527917	0.0589341	18.4797	0	0.508257	0.0979909	6.6714	0.59724	0.105411
rs186762855:32099287:G:A	6	32099287	6p21.33	A	G	0.989	FALSE	rs145827824:32103749:C:G	1	FKBPL (1.2 kb, near_gene/Upstream gene/MODIFIER); ATF6B (3.3 kb, near_gene/Upstream gene/MODIFIER); TNXB (16 kb); PRRT1 (17 kb); PPT2 (22 kb); PPT2-EGFL8 (22 kb); EGFL8 (33 kb); AGPAT1 (37 kb); RNF5 (47 kb); AGER (49 kb)	0.441	0.781 Bioavailable testosterone levels // 0.597 Aspartate aminotransferase levels in low alcohol consumption	- | ABCF1 | ABHD16A | AGER | AIF1 | APOM | ATF6B | ATP6V1G2 | BAG6 | BRD2 | C4A | C4B | C4B_2 | C6orf10 | C6orf25 | C6orf48 | CCHCR1 | CFB | CLIC1 | CSNK2B | CUTA | CYP21A2 | DDAH2 | DDR1 | DDX39B | DOM3Z | DXO | EHMT2 | FLOT1 | GPANK1 | GPSM3 | GTF2H4 | HCG22 | HCG23 | HCG27 | HCP5 | HLA-B | HLA-C | HLA-DOA | HLA-DOB | HLA-DPA1 | HLA-DQA1 | HLA-DQA2 | HLA-DQB1 | HLA-DQB1-AS1 | HLA-DQB2 | HLA-DRA…	ABP1 | CCDC69 | FLOT1 | HLA-E | HLA-F | HLA-H | HLA-V | IER3 | LIMS1 | LINC00243 | MDC1 | NHP2 | PPP1R11 | TRAV12-1 | VARS2 | ZNRD1	Systemic lupus erythematosus:HLA-DOB,HLA-DQA1,HLA-DQA2,HLA-DRA,HLA-DRB1,HLA-DRB5 | Antigen processing and presentation:HLA-C,HLA-DOB,HLA-DQA1,HLA-DQA2,HLA-DRA,HLA-DRB1,HLA-DRB5,HSPA1A,HSPA1B,HSPA1L,TAP2 | Allograft rejection:HLA-C,HLA-DOB,HLA-DQA1,HLA-DQA2,HLA-DRA,HLA-DRB1,HLA-DRB5 | Type I diabetes mellitus:HLA-C,HLA-DOB,HLA-DQA1,HLA-DQA2,HLA-DRA,HLA-DRB1,HLA-DRB5 | Graft-versus-host disease:HLA…	Translocation of ZAP-70 to Immunological synapse:HLA-DQA1,HLA-DQA2,HLA-DRA,HLA-DRB1,HLA-DRB5 | Interferon gamma signaling:HLA-C,HLA-DQA1,HLA-DQA2,HLA-DRA,HLA-DRB1,HLA-DRB5 | Generation of second messenger molecules:HLA-DQA1,HLA-DQA2,HLA-DRA,HLA-DRB1,HLA-DRB5 | Phosphorylation of CD3 and TCR zeta chains:HLA-DQA1,HLA-DQA2,HLA-DRA,HLA-DRB1,HLA-DRB5 | PD-1 signaling:HLA-DQA1,HLA-DQA2,HLA-DRA,HLA-DRB1…	Kawasaki disease:BAG6,HLA-C,HLA-DRB1,PRRC2A | lymphadenitis:BAG6,HLA-C,HLA-DRB1,PRRC2A | lymph node disease:BAG6,HLA-C,HLA-DRB1,PRRC2A | leprosy:HLA-DRB1 | Graves' disease:HLA-C,HLA-DQA1,HLA-DRB1,TAP2 | sarcoidosis:AGER,DDR1,HLA-DQA1,HLA-DRB1,HSPA1L | hypersensitivity reaction type IV disease:AGER,DDR1,HLA-DQA1,HLA-DRB1,HSPA1L | hepatitis:HLA-C,HLA-DQA1,HLA-DRB1,NCR3,PSMB9 | autoimmune disease of…	antigen processing and presentation of exogenous peptide antigen:HLA-C,HLA-DOB,HLA-DQA1,HLA-DQA2,HLA-DRA,HLA-DRB1,HLA-DRB5,PSMB8,PSMB9,TAP2 | antigen processing and presentation of exogenous antigen:HLA-C,HLA-DOB,HLA-DQA1,HLA-DQA2,HLA-DRA,HLA-DRB1,HLA-DRB5,PSMB8,PSMB9,TAP2 | antigen processing and presentation of peptide antigen:HLA-C,HLA-DOB,HLA-DQA1,HLA-DQA2,HLA-DRA,HLA-DRB1,HLA-DRB5,PSMB8,PSMB…	OHP17_all	22.6617	0.0272158	0.0110426	0.0110426	3549	0.186801	0.0684698	2.19602	0	0.218829	0.0550024	4.159	0.251929	0.114067	0.125854	0.438	0.55605	0.607983	0.0610149	22.6617	0.662003	0.515373	0.0671166	13.7942	0	0.7511	0.11651	9.94332	0.259868	0.123192
rs114564020:32149471:G:A	6	32149471	6p21.32	A	G	0.984331	FALSE	rs145827824:32103749:C:G	1	RNF5 (0 kb, intron/Intron/MODIFIER | near_gene/Downstream gene/MODIFIER); AGER (0 kb, intron/Intron/MODIFIER | nc-RNA/Non coding transcript/MODIFIER | near_gene/Downstream gene/MODIFIER | near_gene/Upstream gene/MODIFIER); PBX2 (3 kb, near_gene/Downstream gene/MODIFIER); XXbac-BPG300A18.13 (3 kb, near_gene/Downstream gene/MODIFIER); AGPAT1 (3.6 kb, near_gene/Upstream gene/MODIFIER); GPSM3 (9.1 kb…	12.07	0.781 Bioavailable testosterone levels // 0.597 Aspartate aminotransferase levels in low alcohol consumption	- | ABCF1 | ABHD16A | AGER | AIF1 | APOM | ATF6B | ATP6V1G2 | BAG6 | BRD2 | C4A | C4B | C4B_2 | C6orf10 | C6orf25 | C6orf48 | CCHCR1 | CFB | CLIC1 | CSNK2B | CUTA | CYP21A2 | DDAH2 | DDR1 | DDX39B | DOM3Z | DXO | EHMT2 | FLOT1 | GPANK1 | GPSM3 | GTF2H4 | HCG22 | HCG23 | HCG27 | HCP5 | HLA-B | HLA-C | HLA-DOA | HLA-DOB | HLA-DPA1 | HLA-DQA1 | HLA-DQA2 | HLA-DQB1 | HLA-DQB1-AS1 | HLA-DQB2 | HLA-DRA…	ABP1 | CCDC69 | FLOT1 | HLA-E | HLA-F | HLA-H | HLA-V | IER3 | LIMS1 | LINC00243 | MDC1 | NHP2 | PPP1R11 | TRAV12-1 | VARS2 | ZNRD1	Systemic lupus erythematosus:HLA-DOB,HLA-DQA1,HLA-DQA2,HLA-DRA,HLA-DRB1,HLA-DRB5 | Antigen processing and presentation:HLA-C,HLA-DOB,HLA-DQA1,HLA-DQA2,HLA-DRA,HLA-DRB1,HLA-DRB5,HSPA1A,HSPA1B,HSPA1L,TAP2 | Allograft rejection:HLA-C,HLA-DOB,HLA-DQA1,HLA-DQA2,HLA-DRA,HLA-DRB1,HLA-DRB5 | Type I diabetes mellitus:HLA-C,HLA-DOB,HLA-DQA1,HLA-DQA2,HLA-DRA,HLA-DRB1,HLA-DRB5 | Graft-versus-host disease:HLA…	Translocation of ZAP-70 to Immunological synapse:HLA-DQA1,HLA-DQA2,HLA-DRA,HLA-DRB1,HLA-DRB5 | Interferon gamma signaling:HLA-C,HLA-DQA1,HLA-DQA2,HLA-DRA,HLA-DRB1,HLA-DRB5 | Generation of second messenger molecules:HLA-DQA1,HLA-DQA2,HLA-DRA,HLA-DRB1,HLA-DRB5 | Phosphorylation of CD3 and TCR zeta chains:HLA-DQA1,HLA-DQA2,HLA-DRA,HLA-DRB1,HLA-DRB5 | PD-1 signaling:HLA-DQA1,HLA-DQA2,HLA-DRA,HLA-DRB1…	Kawasaki disease:BAG6,HLA-C,HLA-DRB1,PRRC2A | lymphadenitis:BAG6,HLA-C,HLA-DRB1,PRRC2A | lymph node disease:BAG6,HLA-C,HLA-DRB1,PRRC2A | leprosy:HLA-DRB1 | Graves' disease:HLA-C,HLA-DQA1,HLA-DRB1,TAP2 | sarcoidosis:AGER,DDR1,HLA-DQA1,HLA-DRB1,HSPA1L | hypersensitivity reaction type IV disease:AGER,DDR1,HLA-DQA1,HLA-DRB1,HSPA1L | hepatitis:HLA-C,HLA-DQA1,HLA-DRB1,NCR3,PSMB9 | autoimmune disease of…	antigen processing and presentation of exogenous peptide antigen:HLA-C,HLA-DOB,HLA-DQA1,HLA-DQA2,HLA-DRA,HLA-DRB1,HLA-DRB5,PSMB8,PSMB9,TAP2 | antigen processing and presentation of exogenous antigen:HLA-C,HLA-DOB,HLA-DQA1,HLA-DQA2,HLA-DRA,HLA-DRB1,HLA-DRB5,PSMB8,PSMB9,TAP2 | antigen processing and presentation of peptide antigen:HLA-C,HLA-DOB,HLA-DQA1,HLA-DQA2,HLA-DRA,HLA-DRB1,HLA-DRB5,PSMB8,PSMB…	OHP17_all	22.3174	0.0267972	0.0102824	0.0102824	3549	0.199407	0.0700112	2.35688	0	0.21644	0.0559328	3.96259	0.253823	0.156509	0.130337	0.638595	0.545372	0.623954	0.0631185	22.3174	0.736382	0.490612	0.0685082	12.0976	0	0.848374	0.123645	11.1675	0	0.125324
6:32009301:A:G	6	32009301	6p21.33	G	A	0.924511	FALSE	rs145827824:32103749:C:G	0.569534	CYP21A2 (0 kb, 3'utr/3 prime UTR/MODIFIER | nc-exon/Non coding transcript exon/MODIFIER | nc-RNA/Non coding transcript/MODIFIER | near_gene/Downstream gene/MODIFIER); TNXB (0 kb, intron/Intron/MODIFIER | nc-RNA/Non coding transcript/MODIFIER | near_gene/Downstream gene/MODIFIER); C4B-AS1 (5.3 kb); C4B (6.1 kb); STK19P (28 kb); TNXA (29 kb); CYP21A1P (33 kb); RNA5SP206 (37 kb); C4A-AS1 (38 kb); C4…	5.501	0.729 Bioavailable testosterone levels // 0.581 Aspartate aminotransferase levels in low alcohol consumption // 0.309 Blood protein levels // 0.302 Neurological blood protein biomarker levels	- | ABCF1 | ABHD16A | AGER | AIF1 | APOM | ATF6B | ATP6V1G2 | ATP6V1G2-DDX39B | BAG6 | C2 | C4A | C4B | C4B_2 | C6orf10 | C6orf25 | C6orf48 | CCHCR1 | CFB | CLIC1 | CSNK2B | DDAH2 | DDR1 | DDX39B | DHX16 | DOM3Z | DPCR1 | DXO | EHMT2 | FLOT1 | GPANK1 | GPSM3 | GTF2H4 | HCG22 | HCG23 | HCG27 | HCP5 | HLA-B | HLA-C | HLA-DOA | HLA-DOB | HLA-DQA1 | HLA-DQA2 | HLA-DQB1 | HLA-DRA | HLA-DRB1 | HLA-DRB2…	ABP1 | BTN3A2 | DPM3 | EXOC1 | FLOT1 | GABBR1 | HCG18 | HLA-A | HLA-DRB1 | HLA-DRB2 | HLA-DRB3 | HLA-DRB4 | HLA-DRB5 | HLA-DRB6 | HLA-DRB7 | HLA-DRB8 | HLA-F | HLA-G | HLA-H | HLA-V | IER3 | LIMS1 | LINC00243 | NHP2 | PPP1R11 | SULT1A2 | TMEM154 | VARS2 | ZNRD1	Systemic lupus erythematosus:C4A,C4B,HLA-DOB,HLA-DQA1,HLA-DRA,HLA-DRB1 | Antigen processing and presentation:HLA-C,HLA-DOB,HLA-DQA1,HLA-DRA,HLA-DRB1,HLA-E,HSPA1A,HSPA1B,HSPA1L,TAP2 | Allograft rejection:HLA-C,HLA-DOB,HLA-DQA1,HLA-DRA,HLA-DRB1,HLA-E | Type I diabetes mellitus:HLA-C,HLA-DOB,HLA-DQA1,HLA-DRA,HLA-DRB1,HLA-E,LTA | Graft-versus-host disease:HLA-C,HLA-DOB,HLA-DQA1,HLA-DRA,HLA-DRB1,HLA-E…	Translocation of ZAP-70 to Immunological synapse:HLA-DQA1,HLA-DRA,HLA-DRB1 | Interferon gamma signaling:HLA-C,HLA-DQA1,HLA-DRA,HLA-DRB1,HLA-E | Generation of second messenger molecules:HLA-DQA1,HLA-DRA,HLA-DRB1 | Phosphorylation of CD3 and TCR zeta chains:HLA-DQA1,HLA-DRA,HLA-DRB1 | PD-1 signaling:HLA-DQA1,HLA-DRA,HLA-DRB1 | Interferon Signaling:HLA-C,HLA-DQA1,HLA-DRA,HLA-DRB1,HLA-E,PSMB8 | RNA P…	Kawasaki disease:BAG6,HLA-C,HLA-DRB1,HLA-E,PRRC2A | lymphadenitis:BAG6,HLA-C,HLA-DRB1,HLA-E,PRRC2A | lymph node disease:BAG6,HLA-C,HLA-DRB1,HLA-E,PRRC2A | leprosy:HLA-DRB1,LTA | Graves' disease:HLA-C,HLA-DQA1,HLA-DRB1,TAP2 | sarcoidosis:DDR1,HLA-DQA1,HLA-DRB1,HSPA1L,LTA | hypersensitivity reaction type IV disease:DDR1,HLA-DQA1,HLA-DRB1,HSPA1L,LTA | hepatitis:HLA-C,HLA-DQA1,HLA-DRB1,HLA-E,LTA,NCR3…	antigen processing and presentation of exogenous peptide antigen:HLA-C,HLA-DOB,HLA-DQA1,HLA-DRA,HLA-DRB1,HLA-E,PSMB8,TAP2 | antigen processing and presentation of exogenous antigen:HLA-C,HLA-DOB,HLA-DQA1,HLA-DRA,HLA-DRB1,HLA-E,PSMB8,TAP2 | antigen processing and presentation of peptide antigen:HLA-C,HLA-DOB,HLA-DQA1,HLA-DRA,HLA-DRB1,HLA-E,PSMB8,TAP2 | adaptive immune response:C4A,C4B,HLA-C,HLA-DO…	OHP17_all	22.2605	0.0267279	0.0155144	0.0155144	3549	0.121342	0.0585795	1.41656	0.255394	0.198735	0.0479263	4.47193	0	0.0497335	0.107882	0.190576	0.0739727	0.525165	0.0531958	22.2605	0	0.460941	0.0587607	14.3614	0	0.627068	0.1008	9.30694	0	0.101727
rs139977264:32146548:C:G	6	32146548	6p21.32	G	C	0.986331	FALSE	rs145827824:32103749:C:G	1	RNF5 (0 kb, intron/Intron/MODIFIER | nc-RNA/Non coding transcript/MODIFIER); AGPAT1 (0.68 kb, near_gene/Upstream gene/MODIFIER); AGER (2.2 kb, near_gene/Downstream gene/MODIFIER); PBX2 (6 kb); PPT2-EGFL8 (6.8 kb); EGFL8 (10 kb); GPSM3 (12 kb); PPT2 (13 kb); NOTCH4 (16 kb); PRRT1 (24 kb); FKBPL (48 kb)	9.504	0.781 Bioavailable testosterone levels // 0.597 Aspartate aminotransferase levels in low alcohol consumption	- | ABCF1 | ABHD16A | AGER | AIF1 | APOM | ATF6B | ATP6V1G2 | BAG6 | BRD2 | C4A | C4B | C4B_2 | C6orf10 | C6orf25 | C6orf48 | CCHCR1 | CFB | CLIC1 | CSNK2B | CUTA | CYP21A2 | DDAH2 | DDR1 | DDX39B | DOM3Z | DXO | EHMT2 | FLOT1 | GPANK1 | GPSM3 | GTF2H4 | HCG22 | HCG23 | HCG27 | HCP5 | HLA-B | HLA-C | HLA-DOA | HLA-DOB | HLA-DPA1 | HLA-DQA1 | HLA-DQA2 | HLA-DQB1 | HLA-DQB1-AS1 | HLA-DQB2 | HLA-DRA…	ABP1 | CCDC69 | FLOT1 | HLA-E | HLA-F | HLA-H | HLA-V | IER3 | LIMS1 | LINC00243 | MDC1 | NHP2 | PPP1R11 | TRAV12-1 | VARS2 | ZNRD1	Systemic lupus erythematosus:HLA-DOB,HLA-DQA1,HLA-DQA2,HLA-DRA,HLA-DRB1,HLA-DRB5 | Antigen processing and presentation:HLA-C,HLA-DOB,HLA-DQA1,HLA-DQA2,HLA-DRA,HLA-DRB1,HLA-DRB5,HSPA1A,HSPA1B,HSPA1L,TAP2 | Allograft rejection:HLA-C,HLA-DOB,HLA-DQA1,HLA-DQA2,HLA-DRA,HLA-DRB1,HLA-DRB5 | Type I diabetes mellitus:HLA-C,HLA-DOB,HLA-DQA1,HLA-DQA2,HLA-DRA,HLA-DRB1,HLA-DRB5 | Graft-versus-host disease:HLA…	Translocation of ZAP-70 to Immunological synapse:HLA-DQA1,HLA-DQA2,HLA-DRA,HLA-DRB1,HLA-DRB5 | Interferon gamma signaling:HLA-C,HLA-DQA1,HLA-DQA2,HLA-DRA,HLA-DRB1,HLA-DRB5 | Generation of second messenger molecules:HLA-DQA1,HLA-DQA2,HLA-DRA,HLA-DRB1,HLA-DRB5 | Phosphorylation of CD3 and TCR zeta chains:HLA-DQA1,HLA-DQA2,HLA-DRA,HLA-DRB1,HLA-DRB5 | PD-1 signaling:HLA-DQA1,HLA-DQA2,HLA-DRA,HLA-DRB1…	Kawasaki disease:BAG6,HLA-C,HLA-DRB1,PRRC2A | lymphadenitis:BAG6,HLA-C,HLA-DRB1,PRRC2A | lymph node disease:BAG6,HLA-C,HLA-DRB1,PRRC2A | leprosy:HLA-DRB1 | Graves' disease:HLA-C,HLA-DQA1,HLA-DRB1,TAP2 | sarcoidosis:AGER,DDR1,HLA-DQA1,HLA-DRB1,HSPA1L | hypersensitivity reaction type IV disease:AGER,DDR1,HLA-DQA1,HLA-DRB1,HSPA1L | hepatitis:HLA-C,HLA-DQA1,HLA-DRB1,NCR3,PSMB9 | autoimmune disease of…	antigen processing and presentation of exogenous peptide antigen:HLA-C,HLA-DOB,HLA-DQA1,HLA-DQA2,HLA-DRA,HLA-DRB1,HLA-DRB5,PSMB8,PSMB9,TAP2 | antigen processing and presentation of exogenous antigen:HLA-C,HLA-DOB,HLA-DQA1,HLA-DQA2,HLA-DRA,HLA-DRB1,HLA-DRB5,PSMB8,PSMB9,TAP2 | antigen processing and presentation of peptide antigen:HLA-C,HLA-DOB,HLA-DQA1,HLA-DQA2,HLA-DRA,HLA-DRB1,HLA-DRB5,PSMB8,PSMB…	OHP17_all	22.2291	0.0266896	0.0102923	0.0102923	3549	0.19826	0.0699222	2.33949	0	0.216091	0.0559334	3.9514	0.244919	0.154183	0.13001	0.627731	0.556194	0.622083	0.0630594	22.2291	0.724897	0.490359	0.0685088	12.0857	0	0.842788	0.123336	11.0821	0	0.124395
rs1050862:32131174:C:T	6	32131174	6p21.32	T	C	0.987165	FALSE	rs145827824:32103749:C:G	1	PPT2 (0 kb, 3'utr/3 prime UTR/MODIFIER | intron/Intron/MODIFIER | near_gene/Downstream gene/MODIFIER); PPT2-EGFL8 (0 kb, intron/NMD transcript/MODIFIER | intron/Intron/MODIFIER | nc-RNA/Non coding transcript/MODIFIER); EGFL8 (1.2 kb, near_gene/Upstream gene/MODIFIER); AGPAT1 (4.8 kb, near_gene/Downstream gene/MODIFIER); PRRT1 (9 kb); RNF5 (15 kb); AGER (18 kb); PBX2 (21 kb); GPSM3 (27 kb); NOTCH4…	0.117	0.781 Bioavailable testosterone levels // 0.597 Aspartate aminotransferase levels in low alcohol consumption	- | ABCF1 | ABHD16A | AGER | AIF1 | APOM | ATF6B | ATP6V1G2 | BAG6 | BRD2 | C4A | C4B | C4B_2 | C6orf10 | C6orf25 | C6orf48 | CCHCR1 | CFB | CLIC1 | CSNK2B | CUTA | CYP21A2 | DDAH2 | DDR1 | DDX39B | DOM3Z | DXO | EHMT2 | FLOT1 | GPANK1 | GPSM3 | GTF2H4 | HCG22 | HCG23 | HCG27 | HCP5 | HLA-B | HLA-C | HLA-DOA | HLA-DOB | HLA-DPA1 | HLA-DQA1 | HLA-DQA2 | HLA-DQB1 | HLA-DQB1-AS1 | HLA-DQB2 | HLA-DRA…	ABP1 | CCDC69 | FLOT1 | HLA-E | HLA-F | HLA-H | HLA-V | IER3 | LIMS1 | LINC00243 | MDC1 | NHP2 | PPP1R11 | TRAV12-1 | VARS2 | ZNRD1	Systemic lupus erythematosus:HLA-DOB,HLA-DQA1,HLA-DQA2,HLA-DRA,HLA-DRB1,HLA-DRB5 | Antigen processing and presentation:HLA-C,HLA-DOB,HLA-DQA1,HLA-DQA2,HLA-DRA,HLA-DRB1,HLA-DRB5,HSPA1A,HSPA1B,HSPA1L,TAP2 | Allograft rejection:HLA-C,HLA-DOB,HLA-DQA1,HLA-DQA2,HLA-DRA,HLA-DRB1,HLA-DRB5 | Type I diabetes mellitus:HLA-C,HLA-DOB,HLA-DQA1,HLA-DQA2,HLA-DRA,HLA-DRB1,HLA-DRB5 | Graft-versus-host disease:HLA…	Translocation of ZAP-70 to Immunological synapse:HLA-DQA1,HLA-DQA2,HLA-DRA,HLA-DRB1,HLA-DRB5 | Interferon gamma signaling:HLA-C,HLA-DQA1,HLA-DQA2,HLA-DRA,HLA-DRB1,HLA-DRB5 | Generation of second messenger molecules:HLA-DQA1,HLA-DQA2,HLA-DRA,HLA-DRB1,HLA-DRB5 | Phosphorylation of CD3 and TCR zeta chains:HLA-DQA1,HLA-DQA2,HLA-DRA,HLA-DRB1,HLA-DRB5 | PD-1 signaling:HLA-DQA1,HLA-DQA2,HLA-DRA,HLA-DRB1…	Kawasaki disease:BAG6,HLA-C,HLA-DRB1,PRRC2A | lymphadenitis:BAG6,HLA-C,HLA-DRB1,PRRC2A | lymph node disease:BAG6,HLA-C,HLA-DRB1,PRRC2A | leprosy:HLA-DRB1 | Graves' disease:HLA-C,HLA-DQA1,HLA-DRB1,TAP2 | sarcoidosis:AGER,DDR1,HLA-DQA1,HLA-DRB1,HSPA1L | hypersensitivity reaction type IV disease:AGER,DDR1,HLA-DQA1,HLA-DRB1,HSPA1L | hepatitis:HLA-C,HLA-DQA1,HLA-DRB1,NCR3,PSMB9 | autoimmune disease of…	antigen processing and presentation of exogenous peptide antigen:HLA-C,HLA-DOB,HLA-DQA1,HLA-DQA2,HLA-DRA,HLA-DRB1,HLA-DRB5,PSMB8,PSMB9,TAP2 | antigen processing and presentation of exogenous antigen:HLA-C,HLA-DOB,HLA-DQA1,HLA-DQA2,HLA-DRA,HLA-DRB1,HLA-DRB5,PSMB8,PSMB9,TAP2 | antigen processing and presentation of peptide antigen:HLA-C,HLA-DOB,HLA-DQA1,HLA-DQA2,HLA-DRA,HLA-DRB1,HLA-DRB5,PSMB8,PSMB…	OHP17_all	22.2276	0.0266879	0.0103922	0.0103922	3549	0.197603	0.0698075	2.33303	0	0.216937	0.0559313	3.97862	0.273239	0.151641	0.129514	0.616792	0.551337	0.620035	0.0628539	22.2276	0.732206	0.491286	0.0685061	12.1295	0	0.830374	0.122217	10.9644	0	0.11952
rs11552114:31660848:G:A	6	31660848	6p21.33	A	G	0.994669	FALSE	rs145827824:32103749:C:G	0.692767	ABHD16A (0 kb, exon/Missense/MODERATE | 5'utr/5 prime UTR/MODIFIER | 3'utr/3 prime UTR/MODIFIER | exon/Synonymous/LOW | intron/NMD transcript/MODIFIER | near_gene/Upstream gene/MODIFIER); XXbac-BPG32J3.20 (0 kb, 3'utr/3 prime UTR/MODIFIER); MIR4646 (8 kb); LY6G5C (9 kb); LY6G6F (14 kb); LY6G6E (19 kb); LY6G5B (19 kb); LY6G6D (22 kb); CSNK2B (23 kb); C6orf25 (26 kb); LY6G6C (26 kb); GPANK1 (27 kb)…	9.716	0.927 Bioavailable testosterone levels // 0.863 Aspartate aminotransferase levels in low alcohol consumption // 0.458 Neurological blood protein biomarker levels // 0.411 Heel bone mineral density // 0.346 Blood protein levels	- | ABCF1 | ABHD16A | AGER | AIF1 | APOM | ATF6B | ATP6V1G2 | ATP6V1G2-DDX39B | BAG6 | BAT4 | BTNL2 | C2 | C4A | C4B | C4B_2 | C6orf10 | C6orf25 | C6orf48 | CCHCR1 | CFB | CLIC1 | CSNK2B | CUTA | DDAH2 | DDR1 | DDX39B | DHX16 | DOM3Z | DXO | EHMT2 | FLOT1 | GPANK1 | GPSM3 | GTF2H4 | HCG22 | HCG23 | HCG27 | HCG4B | HCG4P3 | HCP5 | HLA-A | HLA-B | HLA-C | HLA-DOA | HLA-DOB | HLA-DPA1 | HLA-DQA1 | H…	ABP1 | BTN3A2 | CCDC69 | EXOC1 | FLOT1 | HLA-DRB1 | HLA-DRB4 | HLA-DRB5 | HLA-F | HLA-H | HLA-V | IER3 | LIMS1 | MDC1 | NHP2 | PARP2 | PSMB9 | SSRP1 | TAP2 | TMEM154 | TRAV12-1 | TUBB | ZAP70 | ZNF672 | ZNRD1	Systemic lupus erythematosus:HLA-DOB,HLA-DQA1,HLA-DRA,HLA-DRB1 | Antigen processing and presentation:HLA-C,HLA-DOB,HLA-DQA1,HLA-DRA,HLA-DRB1,HLA-E,HSPA1A,HSPA1B,HSPA1L,TAP2 | Allograft rejection:HLA-C,HLA-DOB,HLA-DQA1,HLA-DRA,HLA-DRB1,HLA-E | Type I diabetes mellitus:HLA-C,HLA-DOB,HLA-DQA1,HLA-DRA,HLA-DRB1,HLA-E,LTA | Graft-versus-host disease:HLA-C,HLA-DOB,HLA-DQA1,HLA-DRA,HLA-DRB1,HLA-E | Autoi…	Translocation of ZAP-70 to Immunological synapse:HLA-DQA1,HLA-DRA,HLA-DRB1 | Interferon gamma signaling:HLA-C,HLA-DQA1,HLA-DRA,HLA-DRB1,HLA-E | Generation of second messenger molecules:HLA-DQA1,HLA-DRA,HLA-DRB1 | Phosphorylation of CD3 and TCR zeta chains:HLA-DQA1,HLA-DRA,HLA-DRB1 | PD-1 signaling:HLA-DQA1,HLA-DRA,HLA-DRB1 | Interferon Signaling:HLA-C,HLA-DQA1,HLA-DRA,HLA-DRB1,HLA-E,PSMB8 | RNA P…	Kawasaki disease:ABHD16A,BAG6,HLA-C,HLA-DRB1,HLA-E,PRRC2A | lymphadenitis:ABHD16A,BAG6,HLA-C,HLA-DRB1,HLA-E,PRRC2A | lymph node disease:ABHD16A,BAG6,HLA-C,HLA-DRB1,HLA-E,PRRC2A | leprosy:HLA-DRB1,LTA | Graves' disease:HLA-C,HLA-DQA1,HLA-DRB1,TAP2 | sarcoidosis:DDR1,HLA-DQA1,HLA-DRB1,HSPA1L,LTA | hypersensitivity reaction type IV disease:DDR1,HLA-DQA1,HLA-DRB1,HSPA1L,LTA | hepatitis:APOM,HLA-C,HLA…	antigen processing and presentation of exogenous peptide antigen:HLA-C,HLA-DOB,HLA-DQA1,HLA-DRA,HLA-DRB1,HLA-E,PSMB8,TAP2 | antigen processing and presentation of exogenous antigen:HLA-C,HLA-DOB,HLA-DQA1,HLA-DRA,HLA-DRB1,HLA-E,PSMB8,TAP2 | antigen processing and presentation of peptide antigen:HLA-C,HLA-DOB,HLA-DQA1,HLA-DRA,HLA-DRB1,HLA-E,PSMB8,TAP2 | adaptive immune response:HLA-C,HLA-DOB,HLA-DQ…	OHP17_all	22.1068	0.0265409	0.0150801	0.0150801	3549	0.1445	0.0585026	1.86926	0.108549	0.213465	0.0483259	5.00006	0	0.0563456	0.105742	0.226118	0	0.516972	0.0525551	22.1068	0.255734	0.527798	0.0589247	18.4774	0	0.488035	0.0971921	6.2913	0.495575	0.103087
rs115820082:31635943:A:G	6	31635943	6p21.33	G	A	0.994252	FALSE	rs145827824:32103749:C:G	0.641701	CSNK2B (0 kb, nc-exon/Non coding transcript exon/MODIFIER | intron/Intron/MODIFIER | nc-RNA/Non coding transcript/MODIFIER | near_gene/Downstream gene/MODIFIER); CSNK2B-LY6G5B-1181 (0 kb, intron/Intron/MODIFIER | near_gene/Upstream gene/MODIFIER); GPANK1 (1.9 kb, near_gene/Upstream gene/MODIFIER); LY6G5B (2 kb, near_gene/Upstream gene/MODIFIER); Y_RNA (4.8 kb, near_gene/Downstream gene/MODIFIER);…	5.657	0.858 Bioavailable testosterone levels // 0.799 Aspartate aminotransferase levels in low alcohol consumption // 0.488 Neurological blood protein biomarker levels // 0.45 Heel bone mineral density // 0.373 Blood protein levels // 0.303 Ocular sarcoidosis	- | ABCF1 | ABHD16A | AGER | AIF1 | APOM | ATF6B | ATP6V1G2 | ATP6V1G2-DDX39B | BAG6 | BAT4 | BTNL2 | C2 | C4A | C4B | C4B_2 | C6orf10 | C6orf25 | C6orf48 | CCHCR1 | CFB | CLIC1 | CSNK2B | CUTA | DDAH2 | DDR1 | DDX39B | DHX16 | DOM3Z | DXO | EHMT2 | FLOT1 | GPANK1 | GPSM3 | GTF2H4 | HCG22 | HCG23 | HCG27 | HCG4B | HCG4P3 | HCP5 | HLA-A | HLA-B | HLA-C | HLA-DOA | HLA-DOB | HLA-DPA1 | HLA-DQA1 | H…	ABP1 | BTN3A2 | CCDC69 | EXOC1 | HLA-DRB1 | HLA-DRB4 | HLA-DRB5 | HLA-F | HLA-G | HLA-H | HLA-V | IER3 | LIMS1 | MDC1 | NHP2 | PARP2 | PSMB9 | SSRP1 | TAP2 | TMEM154 | TRAV12-1 | TUBB | ZAP70 | ZNF672 | ZNRD1	Systemic lupus erythematosus:HLA-DOB,HLA-DQA1,HLA-DRA,HLA-DRB1 | Antigen processing and presentation:HLA-C,HLA-DOB,HLA-DQA1,HLA-DRA,HLA-DRB1,HLA-E,HSPA1A,HSPA1B,HSPA1L,TAP2 | Allograft rejection:HLA-C,HLA-DOB,HLA-DQA1,HLA-DRA,HLA-DRB1,HLA-E | Type I diabetes mellitus:HLA-C,HLA-DOB,HLA-DQA1,HLA-DRA,HLA-DRB1,HLA-E,LTA | Graft-versus-host disease:HLA-C,HLA-DOB,HLA-DQA1,HLA-DRA,HLA-DRB1,HLA-E | Autoi…	Translocation of ZAP-70 to Immunological synapse:HLA-DQA1,HLA-DRA,HLA-DRB1 | Interferon gamma signaling:HLA-C,HLA-DQA1,HLA-DRA,HLA-DRB1,HLA-E | Generation of second messenger molecules:HLA-DQA1,HLA-DRA,HLA-DRB1 | Phosphorylation of CD3 and TCR zeta chains:HLA-DQA1,HLA-DRA,HLA-DRB1 | PD-1 signaling:HLA-DQA1,HLA-DRA,HLA-DRB1 | Interferon Signaling:HLA-C,HLA-DQA1,HLA-DRA,HLA-DRB1,HLA-E,PSMB8 | RNA P…	Kawasaki disease:ABHD16A,BAG6,HLA-C,HLA-DRB1,HLA-E,PRRC2A | lymphadenitis:ABHD16A,BAG6,HLA-C,HLA-DRB1,HLA-E,PRRC2A | lymph node disease:ABHD16A,BAG6,HLA-C,HLA-DRB1,HLA-E,PRRC2A | leprosy:HLA-DRB1,LTA | Graves' disease:HLA-C,HLA-DQA1,HLA-DRB1,TAP2 | sarcoidosis:DDR1,HLA-DQA1,HLA-DRB1,HSPA1L,LTA | hypersensitivity reaction type IV disease:DDR1,HLA-DQA1,HLA-DRB1,HSPA1L,LTA | hepatitis:APOM,HLA-C,HLA…	antigen processing and presentation of exogenous peptide antigen:HLA-C,HLA-DOB,HLA-DQA1,HLA-DRA,HLA-DRB1,HLA-E,PSMB8,TAP2 | antigen processing and presentation of exogenous antigen:HLA-C,HLA-DOB,HLA-DQA1,HLA-DRA,HLA-DRB1,HLA-E,PSMB8,TAP2 | antigen processing and presentation of peptide antigen:HLA-C,HLA-DOB,HLA-DQA1,HLA-DRA,HLA-DRB1,HLA-E,PSMB8,TAP2 | adaptive immune response:HLA-C,HLA-DOB,HLA-DQ…	OHP17_all	22.0674	0.0264928	0.0150881	0.0150881	3549	0.14454	0.0585003	1.87022	0.108805	0.213485	0.048325	5.00104	0	0.0564364	0.105736	0.226568	0	0.516479	0.0525539	22.0674	0.265559	0.527785	0.0589238	18.477	0	0.486896	0.0971834	6.26584	0.504303	0.102948
rs35201773:31603045:A:G	6	31603045	6p21.33	G	A	0.994669	FALSE	rs145827824:32103749:C:G	0.641701	PRRC2A (0 kb, exon/Missense/MODERATE | nc-exon/Non coding transcript exon/MODIFIER | nc-RNA/Non coding transcript/MODIFIER | near_gene/Downstream gene/MODIFIER | near_gene/Upstream gene/MODIFIER); BAG6 (3.8 kb, near_gene/Downstream gene/MODIFIER); SNORA38 (12 kb); APOM (17 kb); AIF1 (18 kb); C6orf47 (23 kb); C6orf47-AS1 (23 kb); UQCRHP1 (24 kb); GPANK1 (26 kb); CSNK2B (30 kb); LY6G5B (35 kb); LY6…	20.7	0.858 Bioavailable testosterone levels // 0.799 Aspartate aminotransferase levels in low alcohol consumption // 0.488 Neurological blood protein biomarker levels // 0.45 Heel bone mineral density // 0.373 Blood protein levels // 0.303 Ocular sarcoidosis	- | ABCF1 | ABHD16A | AGER | AIF1 | APOM | ATF6B | ATP6V1G2 | ATP6V1G2-DDX39B | BAG6 | BAT4 | BTNL2 | C2 | C4A | C4B | C4B_2 | C6orf10 | C6orf25 | C6orf48 | CCHCR1 | CFB | CLIC1 | CSNK2B | CUTA | DDAH2 | DDR1 | DDX39B | DHX16 | DOM3Z | DXO | EHMT2 | FLOT1 | GPANK1 | GPSM3 | GTF2H4 | HCG22 | HCG23 | HCG27 | HCG4B | HCG4P3 | HCP5 | HLA-A | HLA-B | HLA-C | HLA-DOA | HLA-DOB | HLA-DPA1 | HLA-DQA1 | H…	ABP1 | BTN3A2 | CCDC69 | EXOC1 | HLA-DRB1 | HLA-DRB4 | HLA-DRB5 | HLA-F | HLA-G | HLA-H | HLA-V | IER3 | LIMS1 | MDC1 | NHP2 | PARP2 | PSMB9 | SSRP1 | TAP2 | TMEM154 | TRAV12-1 | TUBB | ZAP70 | ZNF672 | ZNRD1	Systemic lupus erythematosus:HLA-DOB,HLA-DQA1,HLA-DRA,HLA-DRB1 | Antigen processing and presentation:HLA-C,HLA-DOB,HLA-DQA1,HLA-DRA,HLA-DRB1,HLA-E,HSPA1A,HSPA1B,HSPA1L,TAP2 | Allograft rejection:HLA-C,HLA-DOB,HLA-DQA1,HLA-DRA,HLA-DRB1,HLA-E | Type I diabetes mellitus:HLA-C,HLA-DOB,HLA-DQA1,HLA-DRA,HLA-DRB1,HLA-E,LTA | Graft-versus-host disease:HLA-C,HLA-DOB,HLA-DQA1,HLA-DRA,HLA-DRB1,HLA-E | Autoi…	Translocation of ZAP-70 to Immunological synapse:HLA-DQA1,HLA-DRA,HLA-DRB1 | Interferon gamma signaling:HLA-C,HLA-DQA1,HLA-DRA,HLA-DRB1,HLA-E | Generation of second messenger molecules:HLA-DQA1,HLA-DRA,HLA-DRB1 | Phosphorylation of CD3 and TCR zeta chains:HLA-DQA1,HLA-DRA,HLA-DRB1 | PD-1 signaling:HLA-DQA1,HLA-DRA,HLA-DRB1 | Interferon Signaling:HLA-C,HLA-DQA1,HLA-DRA,HLA-DRB1,HLA-E,PSMB8 | RNA P…	Kawasaki disease:ABHD16A,BAG6,HLA-C,HLA-DRB1,HLA-E,PRRC2A | lymphadenitis:ABHD16A,BAG6,HLA-C,HLA-DRB1,HLA-E,PRRC2A | lymph node disease:ABHD16A,BAG6,HLA-C,HLA-DRB1,HLA-E,PRRC2A | leprosy:HLA-DRB1,LTA | Graves' disease:HLA-C,HLA-DQA1,HLA-DRB1,TAP2 | sarcoidosis:DDR1,HLA-DQA1,HLA-DRB1,HSPA1L,LTA | hypersensitivity reaction type IV disease:DDR1,HLA-DQA1,HLA-DRB1,HSPA1L,LTA | hepatitis:APOM,HLA-C,HLA…	antigen processing and presentation of exogenous peptide antigen:HLA-C,HLA-DOB,HLA-DQA1,HLA-DRA,HLA-DRB1,HLA-E,PSMB8,TAP2 | antigen processing and presentation of exogenous antigen:HLA-C,HLA-DOB,HLA-DQA1,HLA-DRA,HLA-DRB1,HLA-E,PSMB8,TAP2 | antigen processing and presentation of peptide antigen:HLA-C,HLA-DOB,HLA-DQA1,HLA-DRA,HLA-DRB1,HLA-E,PSMB8,TAP2 | adaptive immune response:HLA-C,HLA-DOB,HLA-DQ…	OHP17_all	22.0674	0.0264928	0.0150881	0.0150881	3549	0.14454	0.0585003	1.87022	0.108805	0.213485	0.048325	5.00104	0	0.0564364	0.105736	0.226568	0	0.516479	0.0525539	22.0674	0.265559	0.527785	0.0589238	18.477	0	0.486896	0.0971834	6.26584	0.504303	0.102948
rs180766241:31663932:C:G	6	31663932	6p21.33	G	C	0.994252	FALSE	rs145827824:32103749:C:G	0.641701	ABHD16A (0 kb, intron/NMD transcript/MODIFIER | intron/Intron/MODIFIER | near_gene/Upstream gene/MODIFIER); XXbac-BPG32J3.20 (0 kb, intron/Intron/MODIFIER); MIR4646 (4.9 kb, near_gene/Downstream gene/MODIFIER); LY6G6F (11 kb); LY6G5C (12 kb); LY6G6E (16 kb); LY6G6D (19 kb); LY6G5B (22 kb); C6orf25 (22 kb); LY6G6C (22 kb); CSNK2B (26 kb); GPANK1 (30 kb); DDAH2 (31 kb); CLIC1 (34 kb); C6orf47 (35 k…	8.572	0.858 Bioavailable testosterone levels // 0.799 Aspartate aminotransferase levels in low alcohol consumption // 0.488 Neurological blood protein biomarker levels // 0.45 Heel bone mineral density // 0.373 Blood protein levels // 0.303 Ocular sarcoidosis	- | ABCF1 | ABHD16A | AGER | AIF1 | APOM | ATF6B | ATP6V1G2 | ATP6V1G2-DDX39B | BAG6 | BAT4 | BTNL2 | C2 | C4A | C4B | C4B_2 | C6orf10 | C6orf25 | C6orf48 | CCHCR1 | CFB | CLIC1 | CSNK2B | CUTA | DDAH2 | DDR1 | DDX39B | DHX16 | DOM3Z | DXO | EHMT2 | FLOT1 | GPANK1 | GPSM3 | GTF2H4 | HCG22 | HCG23 | HCG27 | HCG4B | HCG4P3 | HCP5 | HLA-A | HLA-B | HLA-C | HLA-DOA | HLA-DOB | HLA-DPA1 | HLA-DQA1 | H…	ABP1 | BTN3A2 | CCDC69 | EXOC1 | HLA-DRB1 | HLA-DRB4 | HLA-DRB5 | HLA-F | HLA-G | HLA-H | HLA-V | IER3 | LIMS1 | MDC1 | NHP2 | PARP2 | PSMB9 | SSRP1 | TAP2 | TMEM154 | TRAV12-1 | TUBB | ZAP70 | ZNF672 | ZNRD1	Systemic lupus erythematosus:HLA-DOB,HLA-DQA1,HLA-DRA,HLA-DRB1 | Antigen processing and presentation:HLA-C,HLA-DOB,HLA-DQA1,HLA-DRA,HLA-DRB1,HLA-E,HSPA1A,HSPA1B,HSPA1L,TAP2 | Allograft rejection:HLA-C,HLA-DOB,HLA-DQA1,HLA-DRA,HLA-DRB1,HLA-E | Type I diabetes mellitus:HLA-C,HLA-DOB,HLA-DQA1,HLA-DRA,HLA-DRB1,HLA-E,LTA | Graft-versus-host disease:HLA-C,HLA-DOB,HLA-DQA1,HLA-DRA,HLA-DRB1,HLA-E | Autoi…	Translocation of ZAP-70 to Immunological synapse:HLA-DQA1,HLA-DRA,HLA-DRB1 | Interferon gamma signaling:HLA-C,HLA-DQA1,HLA-DRA,HLA-DRB1,HLA-E | Generation of second messenger molecules:HLA-DQA1,HLA-DRA,HLA-DRB1 | Phosphorylation of CD3 and TCR zeta chains:HLA-DQA1,HLA-DRA,HLA-DRB1 | PD-1 signaling:HLA-DQA1,HLA-DRA,HLA-DRB1 | Interferon Signaling:HLA-C,HLA-DQA1,HLA-DRA,HLA-DRB1,HLA-E,PSMB8 | RNA P…	Kawasaki disease:ABHD16A,BAG6,HLA-C,HLA-DRB1,HLA-E,PRRC2A | lymphadenitis:ABHD16A,BAG6,HLA-C,HLA-DRB1,HLA-E,PRRC2A | lymph node disease:ABHD16A,BAG6,HLA-C,HLA-DRB1,HLA-E,PRRC2A | leprosy:HLA-DRB1,LTA | Graves' disease:HLA-C,HLA-DQA1,HLA-DRB1,TAP2 | sarcoidosis:DDR1,HLA-DQA1,HLA-DRB1,HSPA1L,LTA | hypersensitivity reaction type IV disease:DDR1,HLA-DQA1,HLA-DRB1,HSPA1L,LTA | hepatitis:APOM,HLA-C,HLA…	antigen processing and presentation of exogenous peptide antigen:HLA-C,HLA-DOB,HLA-DQA1,HLA-DRA,HLA-DRB1,HLA-E,PSMB8,TAP2 | antigen processing and presentation of exogenous antigen:HLA-C,HLA-DOB,HLA-DQA1,HLA-DRA,HLA-DRB1,HLA-E,PSMB8,TAP2 | antigen processing and presentation of peptide antigen:HLA-C,HLA-DOB,HLA-DQA1,HLA-DRA,HLA-DRB1,HLA-E,PSMB8,TAP2 | adaptive immune response:HLA-C,HLA-DOB,HLA-DQ…	OHP17_all	22.0637	0.0264884	0.0150902	0.0150902	3549	0.144316	0.0585019	1.8655	0.110316	0.213263	0.0483264	4.99155	0	0.0563043	0.105737	0.225932	0	0.516445	0.052555	22.0637	0.261277	0.527606	0.0589255	18.4641	0	0.487059	0.097185	6.26943	0.503075	0.103076
rs149784468:32107859:G:A	6	32107859	6p21.32	A	G	0.987165	FALSE	rs145827824:32103749:C:G	1	PRRT1 (8.3 kb); FKBPL (9.8 kb); ATF6B (12 kb); PPT2 (13 kb); PPT2-EGFL8 (14 kb); EGFL8 (24 kb); TNXB (25 kb); AGPAT1 (28 kb); RNF5 (38 kb); AGER (41 kb); PBX2 (45 kb)	2.854	0.781 Bioavailable testosterone levels // 0.597 Aspartate aminotransferase levels in low alcohol consumption	- | ABCF1 | ABHD16A | AGER | AIF1 | APOM | ATF6B | ATP6V1G2 | BAG6 | BRD2 | C4A | C4B | C4B_2 | C6orf10 | C6orf25 | C6orf48 | CCHCR1 | CFB | CLIC1 | CSNK2B | CUTA | CYP21A2 | DDAH2 | DDR1 | DDX39B | DOM3Z | DXO | EHMT2 | FLOT1 | GPANK1 | GPSM3 | GTF2H4 | HCG22 | HCG23 | HCG27 | HCP5 | HLA-B | HLA-C | HLA-DOA | HLA-DOB | HLA-DPA1 | HLA-DQA1 | HLA-DQA2 | HLA-DQB1 | HLA-DQB1-AS1 | HLA-DQB2 | HLA-DRA…	ABP1 | CCDC69 | FLOT1 | HLA-E | HLA-F | HLA-H | HLA-V | IER3 | LIMS1 | LINC00243 | MDC1 | NHP2 | PPP1R11 | TRAV12-1 | VARS2 | ZNRD1	Systemic lupus erythematosus:HLA-DOB,HLA-DQA1,HLA-DQA2,HLA-DRA,HLA-DRB1,HLA-DRB5 | Antigen processing and presentation:HLA-C,HLA-DOB,HLA-DQA1,HLA-DQA2,HLA-DRA,HLA-DRB1,HLA-DRB5,HSPA1A,HSPA1B,HSPA1L,TAP2 | Allograft rejection:HLA-C,HLA-DOB,HLA-DQA1,HLA-DQA2,HLA-DRA,HLA-DRB1,HLA-DRB5 | Type I diabetes mellitus:HLA-C,HLA-DOB,HLA-DQA1,HLA-DQA2,HLA-DRA,HLA-DRB1,HLA-DRB5 | Graft-versus-host disease:HLA…	Translocation of ZAP-70 to Immunological synapse:HLA-DQA1,HLA-DQA2,HLA-DRA,HLA-DRB1,HLA-DRB5 | Interferon gamma signaling:HLA-C,HLA-DQA1,HLA-DQA2,HLA-DRA,HLA-DRB1,HLA-DRB5 | Generation of second messenger molecules:HLA-DQA1,HLA-DQA2,HLA-DRA,HLA-DRB1,HLA-DRB5 | Phosphorylation of CD3 and TCR zeta chains:HLA-DQA1,HLA-DQA2,HLA-DRA,HLA-DRB1,HLA-DRB5 | PD-1 signaling:HLA-DQA1,HLA-DQA2,HLA-DRA,HLA-DRB1…	Kawasaki disease:BAG6,HLA-C,HLA-DRB1,PRRC2A | lymphadenitis:BAG6,HLA-C,HLA-DRB1,PRRC2A | lymph node disease:BAG6,HLA-C,HLA-DRB1,PRRC2A | leprosy:HLA-DRB1 | Graves' disease:HLA-C,HLA-DQA1,HLA-DRB1,TAP2 | sarcoidosis:AGER,DDR1,HLA-DQA1,HLA-DRB1,HSPA1L | hypersensitivity reaction type IV disease:AGER,DDR1,HLA-DQA1,HLA-DRB1,HSPA1L | hepatitis:HLA-C,HLA-DQA1,HLA-DRB1,NCR3,PSMB9 | autoimmune disease of…	antigen processing and presentation of exogenous peptide antigen:HLA-C,HLA-DOB,HLA-DQA1,HLA-DQA2,HLA-DRA,HLA-DRB1,HLA-DRB5,PSMB8,PSMB9,TAP2 | antigen processing and presentation of exogenous antigen:HLA-C,HLA-DOB,HLA-DQA1,HLA-DQA2,HLA-DRA,HLA-DRB1,HLA-DRB5,PSMB8,PSMB9,TAP2 | antigen processing and presentation of peptide antigen:HLA-C,HLA-DOB,HLA-DQA1,HLA-DQA2,HLA-DRA,HLA-DRB1,HLA-DRB5,PSMB8,PSMB…	OHP17_all	21.9677	0.0263715	0.0111056	0.0111056	3549	0.193708	0.0683185	2.33938	0	0.216222	0.0547271	4.10873	0.290398	0.129247	0.125731	0.517175	0.628307	0.596807	0.0608709	21.9677	0.716283	0.498424	0.0668343	13.055	0	0.752087	0.116668	9.94254	0.258743	0.1239
rs148388130:32110571:C:T	6	32110571	6p21.32	T	C	0.983835	FALSE	rs145827824:32103749:C:G	1	PRRT1 (5.6 kb); PPT2 (11 kb); PPT2-EGFL8 (11 kb); FKBPL (13 kb); ATF6B (15 kb); EGFL8 (22 kb); AGPAT1 (25 kb); TNXB (27 kb); RNF5 (36 kb); AGER (38 kb); PBX2 (42 kb); GPSM3 (48 kb)	0.234	0.781 Bioavailable testosterone levels // 0.597 Aspartate aminotransferase levels in low alcohol consumption	- | ABCF1 | ABHD16A | AGER | AIF1 | APOM | ATF6B | ATP6V1G2 | BAG6 | BRD2 | C4A | C4B | C4B_2 | C6orf10 | C6orf25 | C6orf48 | CCHCR1 | CFB | CLIC1 | CSNK2B | CUTA | CYP21A2 | DDAH2 | DDR1 | DDX39B | DOM3Z | DXO | EHMT2 | FLOT1 | GPANK1 | GPSM3 | GTF2H4 | HCG22 | HCG23 | HCG27 | HCP5 | HLA-B | HLA-C | HLA-DOA | HLA-DOB | HLA-DPA1 | HLA-DQA1 | HLA-DQA2 | HLA-DQB1 | HLA-DQB1-AS1 | HLA-DQB2 | HLA-DRA…	ABP1 | CCDC69 | FLOT1 | HLA-E | HLA-F | HLA-H | HLA-V | IER3 | LIMS1 | LINC00243 | MDC1 | NHP2 | PPP1R11 | TRAV12-1 | VARS2 | ZNRD1	Systemic lupus erythematosus:HLA-DOB,HLA-DQA1,HLA-DQA2,HLA-DRA,HLA-DRB1,HLA-DRB5 | Antigen processing and presentation:HLA-C,HLA-DOB,HLA-DQA1,HLA-DQA2,HLA-DRA,HLA-DRB1,HLA-DRB5,HSPA1A,HSPA1B,HSPA1L,TAP2 | Allograft rejection:HLA-C,HLA-DOB,HLA-DQA1,HLA-DQA2,HLA-DRA,HLA-DRB1,HLA-DRB5 | Type I diabetes mellitus:HLA-C,HLA-DOB,HLA-DQA1,HLA-DQA2,HLA-DRA,HLA-DRB1,HLA-DRB5 | Graft-versus-host disease:HLA…	Translocation of ZAP-70 to Immunological synapse:HLA-DQA1,HLA-DQA2,HLA-DRA,HLA-DRB1,HLA-DRB5 | Interferon gamma signaling:HLA-C,HLA-DQA1,HLA-DQA2,HLA-DRA,HLA-DRB1,HLA-DRB5 | Generation of second messenger molecules:HLA-DQA1,HLA-DQA2,HLA-DRA,HLA-DRB1,HLA-DRB5 | Phosphorylation of CD3 and TCR zeta chains:HLA-DQA1,HLA-DQA2,HLA-DRA,HLA-DRB1,HLA-DRB5 | PD-1 signaling:HLA-DQA1,HLA-DQA2,HLA-DRA,HLA-DRB1…	Kawasaki disease:BAG6,HLA-C,HLA-DRB1,PRRC2A | lymphadenitis:BAG6,HLA-C,HLA-DRB1,PRRC2A | lymph node disease:BAG6,HLA-C,HLA-DRB1,PRRC2A | leprosy:HLA-DRB1 | Graves' disease:HLA-C,HLA-DQA1,HLA-DRB1,TAP2 | sarcoidosis:AGER,DDR1,HLA-DQA1,HLA-DRB1,HSPA1L | hypersensitivity reaction type IV disease:AGER,DDR1,HLA-DQA1,HLA-DRB1,HSPA1L | hepatitis:HLA-C,HLA-DQA1,HLA-DRB1,NCR3,PSMB9 | autoimmune disease of…	antigen processing and presentation of exogenous peptide antigen:HLA-C,HLA-DOB,HLA-DQA1,HLA-DQA2,HLA-DRA,HLA-DRB1,HLA-DRB5,PSMB8,PSMB9,TAP2 | antigen processing and presentation of exogenous antigen:HLA-C,HLA-DOB,HLA-DQA1,HLA-DQA2,HLA-DRA,HLA-DRB1,HLA-DRB5,PSMB8,PSMB9,TAP2 | antigen processing and presentation of peptide antigen:HLA-C,HLA-DOB,HLA-DQA1,HLA-DQA2,HLA-DRA,HLA-DRB1,HLA-DRB5,PSMB8,PSMB…	OHP17_all	21.8898	0.0262766	0.0110248	0.0110248	3549	0.188578	0.0686321	2.22169	0	0.216935	0.0549447	4.10388	0.283984	0.118884	0.126554	0.459006	0.549079	0.599403	0.061249	21.8898	0.726481	0.494517	0.0671513	12.7491	0	0.766618	0.117735	10.1296	0.203477	0.123712
rs28381349:31709045:C:T	6	31709045	6p21.33	T	C	0.998252	FALSE	rs145827824:32103749:C:G	0.524549	MSH5 (0 kb, exon/Missense/MODERATE | nc-exon/Non coding transcript exon/MODIFIER | intron/NMD transcript/MODIFIER | nc-RNA/Non coding transcript/MODIFIER | near_gene/Upstream gene/MODIFIER); MSH5-SAPCD1 (0 kb, exon/Missense/MODERATE | intron/NMD transcript/MODIFIER); CLIC1 (1.5 kb, near_gene/Upstream gene/MODIFIER); DDAH2 (11 kb); C6orf25 (15 kb); RNU6-850P (16 kb); LY6G6C (19 kb); SAPCD1 (22 kb)…	17.78	0.702 Bioavailable testosterone levels // 0.653 Aspartate aminotransferase levels in low alcohol consumption // 0.342 Neurological blood protein biomarker levels // 0.307 Heel bone mineral density	- | ABCF1 | ABHD16A | AGER | AIF1 | ATF6B | ATP6V1G2 | ATP6V1G2-DDX39B | BAG6 | C2 | C4A | C4B | C4B_2 | C6orf10 | C6orf25 | C6orf48 | CCHCR1 | CFB | CLIC1 | CSNK2B | DDAH2 | DDR1 | DDX39B | DHX16 | DOM3Z | DXO | EHMT2 | FLOT1 | GPANK1 | GPSM3 | GTF2H4 | HCG22 | HCG23 | HCG27 | HCG4B | HCG4P3 | HCP5 | HLA-A | HLA-B | HLA-C | HLA-DMB | HLA-DOA | HLA-DOB | HLA-DQA1 | HLA-DQA2 | HLA-DQB1 | HLA-DRA |…	ABP1 | BTN3A2 | GABBR1 | HLA-DQA1 | HLA-DRB1 | HLA-DRB4 | HLA-DRB5 | HLA-F | HLA-H | HLA-V | IER3 | LIMS1 | NHP2 | TAP2 | TMEM154 | ZNRD1	Systemic lupus erythematosus:HLA-DOB,HLA-DQA1,HLA-DRA,HLA-DRB1 | Antigen processing and presentation:HLA-C,HLA-DOB,HLA-DQA1,HLA-DRA,HLA-DRB1,HLA-E,HSPA1A,HSPA1B,HSPA1L,TAP2 | Allograft rejection:HLA-C,HLA-DOB,HLA-DQA1,HLA-DRA,HLA-DRB1,HLA-E | Type I diabetes mellitus:HLA-C,HLA-DOB,HLA-DQA1,HLA-DRA,HLA-DRB1,HLA-E,LTA | Graft-versus-host disease:HLA-C,HLA-DOB,HLA-DQA1,HLA-DRA,HLA-DRB1,HLA-E | Autoi…	Translocation of ZAP-70 to Immunological synapse:HLA-DQA1,HLA-DRA,HLA-DRB1 | Interferon gamma signaling:HLA-C,HLA-DQA1,HLA-DRA,HLA-DRB1,HLA-E | Generation of second messenger molecules:HLA-DQA1,HLA-DRA,HLA-DRB1 | Phosphorylation of CD3 and TCR zeta chains:HLA-DQA1,HLA-DRA,HLA-DRB1 | PD-1 signaling:HLA-DQA1,HLA-DRA,HLA-DRB1 | Interferon Signaling:HLA-C,HLA-DQA1,HLA-DRA,HLA-DRB1,HLA-E,PSMB8 | RNA P…	Kawasaki disease:ABHD16A,BAG6,HLA-C,HLA-DRB1,HLA-E,PRRC2A | lymphadenitis:ABHD16A,BAG6,HLA-C,HLA-DRB1,HLA-E,PRRC2A | lymph node disease:ABHD16A,BAG6,HLA-C,HLA-DRB1,HLA-E,PRRC2A | leprosy:HLA-DRB1,LTA | Graves' disease:HLA-C,HLA-DQA1,HLA-DRB1,TAP2 | sarcoidosis:DDR1,HLA-DQA1,HLA-DRB1,HSPA1L,LTA | hypersensitivity reaction type IV disease:DDR1,HLA-DQA1,HLA-DRB1,HSPA1L,LTA | hepatitis:HLA-C,HLA-DQA1…	antigen processing and presentation of exogenous peptide antigen:HLA-C,HLA-DOB,HLA-DQA1,HLA-DRA,HLA-DRB1,HLA-E,PSMB8,TAP2 | antigen processing and presentation of exogenous antigen:HLA-C,HLA-DOB,HLA-DQA1,HLA-DRA,HLA-DRB1,HLA-E,PSMB8,TAP2 | antigen processing and presentation of peptide antigen:HLA-C,HLA-DOB,HLA-DQA1,HLA-DRA,HLA-DRB1,HLA-E,PSMB8,TAP2 | adaptive immune response:HLA-C,HLA-DOB,HLA-DQ…	OHP17_all	21.8657	0.0262472	0.0179473	0.0179473	3549	0.11215	0.0537297	1.43343	0.427273	0.153268	0.0444394	3.24961	0.510642	0.0772567	0.0982796	0.364703	0	0.474649	0.0485291	21.8657	0	0.432569	0.0545434	14.6618	0	0.525679	0.0896402	8.34707	0	0.107105
6:32009354:T:C	6	32009354	6p21.33	C	T	0.834913	FALSE	rs145827824:32103749:C:G	0.354112	CYP21A2 (0 kb, 3'utr/3 prime UTR/MODIFIER | nc-exon/Non coding transcript exon/MODIFIER | nc-RNA/Non coding transcript/MODIFIER | near_gene/Downstream gene/MODIFIER); TNXB (0 kb, intron/Intron/MODIFIER | nc-RNA/Non coding transcript/MODIFIER | near_gene/Downstream gene/MODIFIER); C4B-AS1 (5.3 kb); C4B (6.2 kb); STK19P (28 kb); TNXA (29 kb); CYP21A1P (33 kb); RNA5SP206 (37 kb); C4A-AS1 (38 kb); C4…		0.499 Bioavailable testosterone levels // 0.352 Aspartate aminotransferase levels in low alcohol consumption	- | ABCF1 | ABHD16A | AIF1 | ATF6B | ATP6V1G2 | ATP6V1G2-DDX39B | BAG6 | C2 | C4A | C4B | C4B_2 | C6orf10 | C6orf48 | CLIC1 | CSNK2B | DDAH2 | DDR1 | DDX39B | DXO | FLOT1 | GPANK1 | GPSM3 | GTF2H4 | HCG22 | HCG23 | HCG27 | HCP5 | HLA-B | HLA-C | HLA-DOB | HLA-DQA1 | HLA-DQA2 | HLA-DQB1 | HLA-DRA | HLA-DRB1 | HLA-DRB2 | HLA-DRB3 | HLA-DRB4 | HLA-DRB5 | HLA-DRB6 | HLA-DRB7 | HLA-DRB8 | HLA-E | HSPA…	BTN3A2 | FLOT1 | HLA-DQA1 | HLA-DRB1 | HLA-DRB4 | HLA-DRB5 | HLA-F | HLA-H | IER3 | LINC00243 | VARS2 | ZNRD1	Systemic lupus erythematosus:C4A,C4B | Staphylococcus aureus infection:C4A,C4B | Steroid hormone biosynthesis:CYP21A2 | Cortisol synthesis and secretion:CYP21A2 | Cushing syndrome:CYP21A2 | Pertussis:C4A,C4B | Human papillomavirus infection:TNXB | Complement and coagulation cascades:C4A,C4B | Coronavirus disease - COVID-19:C4A,C4B | Aldosterone synthesis and secretion:CYP21A2	Glucocorticoid biosynthesis:CYP21A2 | Metabolism of steroid hormones:CYP21A2 | Initial triggering of complement:C4A,C4B,C4B_2 | Regulation of Complement cascade:C4A,C4B,C4B_2 | Endogenous sterols:CYP21A2 | Metabolism of steroids:CYP21A2 | Complement cascade:C4A,C4B,C4B_2 | Metabolic disorders of biological oxidation enzymes:CYP21A2 | Cytochrome P450 - arranged by substrate type:CYP21A2	multiple sclerosis:C4A | demyelinating disease:C4A | endocrine system disease:CYP21A2 | purpura:C4B | periodontitis:C4A,C4B | kidney disease:C4A,C4B | urinary system disease:C4A,C4B | hemorrhagic disease:C4B | proteinuria:C4A,C4B | blood coagulation disease:C4B | periodontal disease:C4A,C4B | collagen disease:TNXB | nephritis:C4A,C4B | integumentary system disease:C4A,CYP21A2 | adrenal cortex dis…	adaptive immune response:C4A,C4B | lymphocyte mediated immunity:C4A,C4B | adaptive immune response based on somatic recombination of immune receptors built from immunoglobulin superfamily domains:C4A,C4B | hormone biosynthetic process:CYP21A2 | glucocorticoid biosynthetic process:CYP21A2 | regulation of immune effector process:C4A,C4B | mineralocorticoid biosynthetic process:CYP21A2 | mineralocor…	OHP17_all	21.8347	0.0262096	0.0112902	0.0112902	3549	0.192432	0.0736019	2.04886	0.708731	0.274954	0.0638637	4.77794	0	0.136714	0.131877	0.523045	0.684125	0.664204	0.0679596	21.8347	0	0.659489	0.078768	16.2488	0	0.664206	0.120391	7.46411	0.387435	0.129295
rs148964320:32108909:C:G	6	32108909	6p21.32	G	C	0.987165	FALSE	rs145827824:32103749:C:G	1	PRRT1 (7.2 kb); FKBPL (11 kb); PPT2 (12 kb); PPT2-EGFL8 (13 kb); ATF6B (13 kb); EGFL8 (23 kb); TNXB (26 kb); AGPAT1 (27 kb); RNF5 (37 kb); AGER (40 kb); PBX2 (44 kb); GPSM3 (50 kb)	12.96	0.781 Bioavailable testosterone levels // 0.597 Aspartate aminotransferase levels in low alcohol consumption	- | ABCF1 | ABHD16A | AGER | AIF1 | APOM | ATF6B | ATP6V1G2 | BAG6 | BRD2 | C4A | C4B | C4B_2 | C6orf10 | C6orf25 | C6orf48 | CCHCR1 | CFB | CLIC1 | CSNK2B | CUTA | CYP21A2 | DDAH2 | DDR1 | DDX39B | DOM3Z | DXO | EHMT2 | FLOT1 | GPANK1 | GPSM3 | GTF2H4 | HCG22 | HCG23 | HCG27 | HCP5 | HLA-B | HLA-C | HLA-DOA | HLA-DOB | HLA-DPA1 | HLA-DQA1 | HLA-DQA2 | HLA-DQB1 | HLA-DQB1-AS1 | HLA-DQB2 | HLA-DRA…	ABP1 | CCDC69 | FLOT1 | HLA-E | HLA-F | HLA-H | HLA-V | IER3 | LIMS1 | LINC00243 | MDC1 | NHP2 | PPP1R11 | TRAV12-1 | VARS2 | ZNRD1	Systemic lupus erythematosus:HLA-DOB,HLA-DQA1,HLA-DQA2,HLA-DRA,HLA-DRB1,HLA-DRB5 | Antigen processing and presentation:HLA-C,HLA-DOB,HLA-DQA1,HLA-DQA2,HLA-DRA,HLA-DRB1,HLA-DRB5,HSPA1A,HSPA1B,HSPA1L,TAP2 | Allograft rejection:HLA-C,HLA-DOB,HLA-DQA1,HLA-DQA2,HLA-DRA,HLA-DRB1,HLA-DRB5 | Type I diabetes mellitus:HLA-C,HLA-DOB,HLA-DQA1,HLA-DQA2,HLA-DRA,HLA-DRB1,HLA-DRB5 | Graft-versus-host disease:HLA…	Translocation of ZAP-70 to Immunological synapse:HLA-DQA1,HLA-DQA2,HLA-DRA,HLA-DRB1,HLA-DRB5 | Interferon gamma signaling:HLA-C,HLA-DQA1,HLA-DQA2,HLA-DRA,HLA-DRB1,HLA-DRB5 | Generation of second messenger molecules:HLA-DQA1,HLA-DQA2,HLA-DRA,HLA-DRB1,HLA-DRB5 | Phosphorylation of CD3 and TCR zeta chains:HLA-DQA1,HLA-DQA2,HLA-DRA,HLA-DRB1,HLA-DRB5 | PD-1 signaling:HLA-DQA1,HLA-DQA2,HLA-DRA,HLA-DRB1…	Kawasaki disease:BAG6,HLA-C,HLA-DRB1,PRRC2A | lymphadenitis:BAG6,HLA-C,HLA-DRB1,PRRC2A | lymph node disease:BAG6,HLA-C,HLA-DRB1,PRRC2A | leprosy:HLA-DRB1 | Graves' disease:HLA-C,HLA-DQA1,HLA-DRB1,TAP2 | sarcoidosis:AGER,DDR1,HLA-DQA1,HLA-DRB1,HSPA1L | hypersensitivity reaction type IV disease:AGER,DDR1,HLA-DQA1,HLA-DRB1,HSPA1L | hepatitis:HLA-C,HLA-DQA1,HLA-DRB1,NCR3,PSMB9 | autoimmune disease of…	antigen processing and presentation of exogenous peptide antigen:HLA-C,HLA-DOB,HLA-DQA1,HLA-DQA2,HLA-DRA,HLA-DRB1,HLA-DRB5,PSMB8,PSMB9,TAP2 | antigen processing and presentation of exogenous antigen:HLA-C,HLA-DOB,HLA-DQA1,HLA-DQA2,HLA-DRA,HLA-DRB1,HLA-DRB5,PSMB8,PSMB9,TAP2 | antigen processing and presentation of peptide antigen:HLA-C,HLA-DOB,HLA-DQA1,HLA-DQA2,HLA-DRA,HLA-DRB1,HLA-DRB5,PSMB8,PSMB…	OHP17_all	21.8093	0.0261787	0.0111183	0.0111183	3549	0.19355	0.0682751	2.33869	0	0.215416	0.0546359	4.09392	0.30163	0.129193	0.125716	0.516968	0.626712	0.594018	0.0608152	21.8093	0.727579	0.494271	0.066732	12.8881	0	0.752308	0.116697	9.94346	0.258206	0.123967
rs114117962:31577845:G:C	6	31577845	6p21.33	C	G	0.862354	FALSE	rs145827824:32103749:C:G	0.641701	UQCRHP1 (1 kb, near_gene/Downstream gene/MODIFIER); AIF1 (5.1 kb); PRRC2A (11 kb); SNORA38 (13 kb); NCR3 (17 kb); LST1 (21 kb); LTB (28 kb); BAG6 (29 kb); TNF (32 kb); LTA (36 kb); APOM (42 kb); C6orf47 (48 kb); C6orf47-AS1 (48 kb)	4.008	0.858 Bioavailable testosterone levels // 0.799 Aspartate aminotransferase levels in low alcohol consumption // 0.488 Neurological blood protein biomarker levels // 0.45 Heel bone mineral density // 0.373 Blood protein levels // 0.303 Ocular sarcoidosis	- | ABCF1 | ABHD16A | AGER | AIF1 | APOM | ATF6B | ATP6V1G2 | ATP6V1G2-DDX39B | BAG6 | BAT4 | BTNL2 | C2 | C4A | C4B | C4B_2 | C6orf10 | C6orf25 | C6orf48 | CCHCR1 | CFB | CLIC1 | CSNK2B | CUTA | DDAH2 | DDR1 | DDX39B | DHX16 | DOM3Z | DXO | EHMT2 | FLOT1 | GPANK1 | GPSM3 | GTF2H4 | HCG22 | HCG23 | HCG27 | HCG4B | HCG4P3 | HCP5 | HLA-A | HLA-B | HLA-C | HLA-DOA | HLA-DOB | HLA-DPA1 | HLA-DQA1 | H…	ABP1 | BTN3A2 | CCDC69 | EXOC1 | HLA-DRB1 | HLA-DRB4 | HLA-DRB5 | HLA-F | HLA-G | HLA-H | HLA-V | IER3 | LIMS1 | MDC1 | NHP2 | PARP2 | PSMB9 | SSRP1 | TAP2 | TMEM154 | TRAV12-1 | TUBB | ZAP70 | ZNF672 | ZNRD1	Systemic lupus erythematosus:HLA-DOB,HLA-DQA1,HLA-DRA,HLA-DRB1,TNF | Antigen processing and presentation:HLA-C,HLA-DOB,HLA-DQA1,HLA-DRA,HLA-DRB1,HLA-E,HSPA1A,HSPA1B,HSPA1L,TAP2,TNF | Allograft rejection:HLA-C,HLA-DOB,HLA-DQA1,HLA-DRA,HLA-DRB1,HLA-E,TNF | Type I diabetes mellitus:HLA-C,HLA-DOB,HLA-DQA1,HLA-DRA,HLA-DRB1,HLA-E,LTA,TNF | Graft-versus-host disease:HLA-C,HLA-DOB,HLA-DQA1,HLA-DRA,HLA-DR…	Translocation of ZAP-70 to Immunological synapse:HLA-DQA1,HLA-DRA,HLA-DRB1 | Interferon gamma signaling:HLA-C,HLA-DQA1,HLA-DRA,HLA-DRB1,HLA-E | Generation of second messenger molecules:HLA-DQA1,HLA-DRA,HLA-DRB1 | Phosphorylation of CD3 and TCR zeta chains:HLA-DQA1,HLA-DRA,HLA-DRB1 | PD-1 signaling:HLA-DQA1,HLA-DRA,HLA-DRB1 | Interferon Signaling:HLA-C,HLA-DQA1,HLA-DRA,HLA-DRB1,HLA-E,PSMB8 | RNA P…	Kawasaki disease:ABHD16A,BAG6,HLA-C,HLA-DRB1,HLA-E,PRRC2A,TNF | lymphadenitis:ABHD16A,BAG6,HLA-C,HLA-DRB1,HLA-E,PRRC2A,TNF | lymph node disease:ABHD16A,BAG6,HLA-C,HLA-DRB1,HLA-E,PRRC2A,TNF | leprosy:HLA-DRB1,LTA,TNF | Graves' disease:HLA-C,HLA-DQA1,HLA-DRB1,TAP2,TNF | sarcoidosis:DDR1,HLA-DQA1,HLA-DRB1,HSPA1L,LTA,TNF | hypersensitivity reaction type IV disease:DDR1,HLA-DQA1,HLA-DRB1,HSPA1L,LTA,TN…	antigen processing and presentation of exogenous peptide antigen:HLA-C,HLA-DOB,HLA-DQA1,HLA-DRA,HLA-DRB1,HLA-E,PSMB8,TAP2 | antigen processing and presentation of exogenous antigen:HLA-C,HLA-DOB,HLA-DQA1,HLA-DRA,HLA-DRB1,HLA-E,PSMB8,TAP2 | antigen processing and presentation of peptide antigen:HLA-C,HLA-DOB,HLA-DQA1,HLA-DRA,HLA-DRB1,HLA-E,PSMB8,TAP2 | adaptive immune response:HLA-C,HLA-DOB,HLA-DQ…	OHP17_all	21.3734	0.0256474	0.017226	0.017226	3549	0.141752	0.0583912	1.81822	0.185738	0.220767	0.0482442	5.32434	0	0.0476534	0.105533	0.186022	0	0.507556	0.0525131	21.3734	0.108181	0.519799	0.0588953	17.9639	0	0.477711	0.0970853	6.06539	0.490151	0.100542
rs113310853:31405598:C:T	6	31405598	6p21.33	T	C	0.999	FALSE	rs145827824:32103749:C:G	0.422257	HCP5 (0 kb, intron/Intron/MODIFIER | nc-RNA/Non coding transcript/MODIFIER); LINC01149 (3.8 kb, near_gene/Upstream gene/MODIFIER); MICA (23 kb); HLA-S (56 kb)	16.25	0.645 Heel bone mineral density // 0.595 Bioavailable testosterone levels // 0.585 Neurological blood protein biomarker levels // 0.554 Aspartate aminotransferase levels in low alcohol consumption // 0.517 Blood protein levels	- | ABCF1 | ABHD16A | AGER | AIF1 | APOM | ATF6B | ATP6V1G2 | ATP6V1G2-DDX39B | BAG6 | C2 | C4A | C4B | C4B_2 | C6orf10 | C6orf48 | CCHCR1 | CLIC1 | CSNK2B | DDAH2 | DDR1 | DDX39B | DHX16 | DOM3Z | DXO | EHMT2 | FLOT1 | GPANK1 | GPSM3 | GTF2H4 | HCG22 | HCG23 | HCG27 | HCG4B | HCG4P3 | HCP5 | HLA-A | HLA-B | HLA-C | HLA-DOB | HLA-DQA1 | HLA-DQA2 | HLA-DQB1 | HLA-DQB2 | HLA-DRA | HLA-DRB1 | HLA-DR…	BTN3A2 | C6orf10 | CDC42EP4 | HLA-A | HLA-DQA1 | HLA-DQA2 | HLA-DRB1 | HLA-DRB4 | HLA-DRB5 | HLA-F | HLA-H | HLA-V | IER3 | NHP2 | PARP2 | TAP2 | TMEM154 | XRCC6 | ZNRD1	Systemic lupus erythematosus:HLA-DOB,HLA-DQA1,HLA-DRA,HLA-DRB1 | Antigen processing and presentation:HLA-C,HLA-DOB,HLA-DQA1,HLA-DRA,HLA-DRB1,HLA-E,HSPA1A,HSPA1B,HSPA1L,TAP2 | Allograft rejection:HLA-C,HLA-DOB,HLA-DQA1,HLA-DRA,HLA-DRB1,HLA-E | Type I diabetes mellitus:HLA-C,HLA-DOB,HLA-DQA1,HLA-DRA,HLA-DRB1,HLA-E,LTA | Graft-versus-host disease:HLA-C,HLA-DOB,HLA-DQA1,HLA-DRA,HLA-DRB1,HLA-E | Autoi…	Translocation of ZAP-70 to Immunological synapse:HLA-DQA1,HLA-DRA,HLA-DRB1 | Interferon gamma signaling:HLA-C,HLA-DQA1,HLA-DRA,HLA-DRB1,HLA-E | Generation of second messenger molecules:HLA-DQA1,HLA-DRA,HLA-DRB1 | Phosphorylation of CD3 and TCR zeta chains:HLA-DQA1,HLA-DRA,HLA-DRB1 | PD-1 signaling:HLA-DQA1,HLA-DRA,HLA-DRB1 | Interferon Signaling:HLA-C,HLA-DQA1,HLA-DRA,HLA-DRB1,HLA-E | RNA Polymer…	Kawasaki disease:BAG6,HLA-C,HLA-DRB1,HLA-E,PRRC2A | lymphadenitis:BAG6,HLA-C,HLA-DRB1,HLA-E,PRRC2A | lymph node disease:BAG6,HLA-C,HLA-DRB1,HLA-E,PRRC2A | leprosy:HLA-DRB1,LTA,MICA | Graves' disease:HLA-C,HLA-DQA1,HLA-DRB1,TAP2 | sarcoidosis:DDR1,HLA-DQA1,HLA-DRB1,HSPA1L,LTA | hypersensitivity reaction type IV disease:DDR1,HLA-DQA1,HLA-DRB1,HSPA1L,LTA | hepatitis:HLA-C,HLA-DQA1,HLA-DRB1,HLA-E,LTA…	antigen processing and presentation of exogenous peptide antigen:HLA-C,HLA-DOB,HLA-DQA1,HLA-DRA,HLA-DRB1,HLA-E,TAP2 | antigen processing and presentation of exogenous antigen:HLA-C,HLA-DOB,HLA-DQA1,HLA-DRA,HLA-DRB1,HLA-E,TAP2 | antigen processing and presentation of peptide antigen:HLA-C,HLA-DOB,HLA-DQA1,HLA-DRA,HLA-DRB1,HLA-E,TAP2 | adaptive immune response:HLA-C,HLA-DOB,HLA-DQA1,HLA-DRA,HLA-DRB…	OHP17_all	21.3253	0.0255888	0.0153425	0.0153425	3549	0.164353	0.0567557	2.42229	0	0.214576	0.0485362	5.00759	0	0.0782149	0.0992883	0.365685	0	0.504285	0.0522359	21.3253	0.056796	0.51466	0.0592148	17.4461	0	0.476397	0.0953724	6.23193	0.329651	0.0906938
rs73404209:31405671:T:C	6	31405671	6p21.33	C	T	0.999	FALSE	rs145827824:32103749:C:G	0.422257	HCP5 (0 kb, intron/Intron/MODIFIER | nc-RNA/Non coding transcript/MODIFIER); LINC01149 (3.8 kb, near_gene/Upstream gene/MODIFIER); MICA (23 kb); HLA-S (56 kb)	0.849	0.645 Heel bone mineral density // 0.595 Bioavailable testosterone levels // 0.585 Neurological blood protein biomarker levels // 0.554 Aspartate aminotransferase levels in low alcohol consumption // 0.517 Blood protein levels	- | ABCF1 | ABHD16A | AGER | AIF1 | APOM | ATF6B | ATP6V1G2 | ATP6V1G2-DDX39B | BAG6 | C2 | C4A | C4B | C4B_2 | C6orf10 | C6orf48 | CCHCR1 | CLIC1 | CSNK2B | DDAH2 | DDR1 | DDX39B | DHX16 | DOM3Z | DXO | EHMT2 | FLOT1 | GPANK1 | GPSM3 | GTF2H4 | HCG22 | HCG23 | HCG27 | HCG4B | HCG4P3 | HCP5 | HLA-A | HLA-B | HLA-C | HLA-DOB | HLA-DQA1 | HLA-DQA2 | HLA-DQB1 | HLA-DQB2 | HLA-DRA | HLA-DRB1 | HLA-DR…	BTN3A2 | C6orf10 | CDC42EP4 | HLA-A | HLA-DQA1 | HLA-DQA2 | HLA-DRB1 | HLA-DRB4 | HLA-DRB5 | HLA-F | HLA-H | HLA-V | IER3 | NHP2 | PARP2 | TAP2 | TMEM154 | XRCC6 | ZNRD1	Systemic lupus erythematosus:HLA-DOB,HLA-DQA1,HLA-DRA,HLA-DRB1 | Antigen processing and presentation:HLA-C,HLA-DOB,HLA-DQA1,HLA-DRA,HLA-DRB1,HLA-E,HSPA1A,HSPA1B,HSPA1L,TAP2 | Allograft rejection:HLA-C,HLA-DOB,HLA-DQA1,HLA-DRA,HLA-DRB1,HLA-E | Type I diabetes mellitus:HLA-C,HLA-DOB,HLA-DQA1,HLA-DRA,HLA-DRB1,HLA-E,LTA | Graft-versus-host disease:HLA-C,HLA-DOB,HLA-DQA1,HLA-DRA,HLA-DRB1,HLA-E | Autoi…	Translocation of ZAP-70 to Immunological synapse:HLA-DQA1,HLA-DRA,HLA-DRB1 | Interferon gamma signaling:HLA-C,HLA-DQA1,HLA-DRA,HLA-DRB1,HLA-E | Generation of second messenger molecules:HLA-DQA1,HLA-DRA,HLA-DRB1 | Phosphorylation of CD3 and TCR zeta chains:HLA-DQA1,HLA-DRA,HLA-DRB1 | PD-1 signaling:HLA-DQA1,HLA-DRA,HLA-DRB1 | Interferon Signaling:HLA-C,HLA-DQA1,HLA-DRA,HLA-DRB1,HLA-E | RNA Polymer…	Kawasaki disease:BAG6,HLA-C,HLA-DRB1,HLA-E,PRRC2A | lymphadenitis:BAG6,HLA-C,HLA-DRB1,HLA-E,PRRC2A | lymph node disease:BAG6,HLA-C,HLA-DRB1,HLA-E,PRRC2A | leprosy:HLA-DRB1,LTA,MICA | Graves' disease:HLA-C,HLA-DQA1,HLA-DRB1,TAP2 | sarcoidosis:DDR1,HLA-DQA1,HLA-DRB1,HSPA1L,LTA | hypersensitivity reaction type IV disease:DDR1,HLA-DQA1,HLA-DRB1,HSPA1L,LTA | hepatitis:HLA-C,HLA-DQA1,HLA-DRB1,HLA-E,LTA…	antigen processing and presentation of exogenous peptide antigen:HLA-C,HLA-DOB,HLA-DQA1,HLA-DRA,HLA-DRB1,HLA-E,TAP2 | antigen processing and presentation of exogenous antigen:HLA-C,HLA-DOB,HLA-DQA1,HLA-DRA,HLA-DRB1,HLA-E,TAP2 | antigen processing and presentation of peptide antigen:HLA-C,HLA-DOB,HLA-DQA1,HLA-DRA,HLA-DRB1,HLA-E,TAP2 | adaptive immune response:HLA-C,HLA-DOB,HLA-DQA1,HLA-DRA,HLA-DRB…	OHP17_all	21.3253	0.0255888	0.0153425	0.0153425	3549	0.164353	0.0567557	2.42229	0	0.214576	0.0485362	5.00759	0	0.0782149	0.0992883	0.365685	0	0.504285	0.0522359	21.3253	0.056796	0.51466	0.0592148	17.4461	0	0.476397	0.0953724	6.23193	0.329651	0.0906938
rs73404205:31404793:G:A	6	31404793	6p21.33	A	G	0.999	FALSE	rs145827824:32103749:C:G	0.422257	HCP5 (0 kb, intron/Intron/MODIFIER | nc-RNA/Non coding transcript/MODIFIER); LINC01149 (4.7 kb, near_gene/Upstream gene/MODIFIER); MICA (22 kb); HLA-S (55 kb)	9.533	0.645 Heel bone mineral density // 0.595 Bioavailable testosterone levels // 0.585 Neurological blood protein biomarker levels // 0.554 Aspartate aminotransferase levels in low alcohol consumption // 0.517 Blood protein levels	- | ABCF1 | ABHD16A | AGER | AIF1 | APOM | ATF6B | ATP6V1G2 | ATP6V1G2-DDX39B | BAG6 | C2 | C4A | C4B | C4B_2 | C6orf10 | C6orf48 | CCHCR1 | CLIC1 | CSNK2B | DDAH2 | DDR1 | DDX39B | DHX16 | DOM3Z | DXO | EHMT2 | FLOT1 | GPANK1 | GPSM3 | GTF2H4 | HCG22 | HCG23 | HCG27 | HCG4B | HCG4P3 | HCP5 | HLA-A | HLA-B | HLA-C | HLA-DOB | HLA-DQA1 | HLA-DQA2 | HLA-DQB1 | HLA-DQB2 | HLA-DRA | HLA-DRB1 | HLA-DR…	BTN3A2 | C6orf10 | CDC42EP4 | HLA-A | HLA-DQA1 | HLA-DQA2 | HLA-DRB1 | HLA-DRB4 | HLA-DRB5 | HLA-F | HLA-H | HLA-V | IER3 | NHP2 | PARP2 | TAP2 | TMEM154 | XRCC6 | ZNRD1	Systemic lupus erythematosus:HLA-DOB,HLA-DQA1,HLA-DRA,HLA-DRB1 | Antigen processing and presentation:HLA-C,HLA-DOB,HLA-DQA1,HLA-DRA,HLA-DRB1,HLA-E,HSPA1A,HSPA1B,HSPA1L,TAP2 | Allograft rejection:HLA-C,HLA-DOB,HLA-DQA1,HLA-DRA,HLA-DRB1,HLA-E | Type I diabetes mellitus:HLA-C,HLA-DOB,HLA-DQA1,HLA-DRA,HLA-DRB1,HLA-E,LTA | Graft-versus-host disease:HLA-C,HLA-DOB,HLA-DQA1,HLA-DRA,HLA-DRB1,HLA-E | Autoi…	Translocation of ZAP-70 to Immunological synapse:HLA-DQA1,HLA-DRA,HLA-DRB1 | Interferon gamma signaling:HLA-C,HLA-DQA1,HLA-DRA,HLA-DRB1,HLA-E | Generation of second messenger molecules:HLA-DQA1,HLA-DRA,HLA-DRB1 | Phosphorylation of CD3 and TCR zeta chains:HLA-DQA1,HLA-DRA,HLA-DRB1 | PD-1 signaling:HLA-DQA1,HLA-DRA,HLA-DRB1 | Interferon Signaling:HLA-C,HLA-DQA1,HLA-DRA,HLA-DRB1,HLA-E | RNA Polymer…	Kawasaki disease:BAG6,HLA-C,HLA-DRB1,HLA-E,PRRC2A | lymphadenitis:BAG6,HLA-C,HLA-DRB1,HLA-E,PRRC2A | lymph node disease:BAG6,HLA-C,HLA-DRB1,HLA-E,PRRC2A | leprosy:HLA-DRB1,LTA,MICA | Graves' disease:HLA-C,HLA-DQA1,HLA-DRB1,TAP2 | sarcoidosis:DDR1,HLA-DQA1,HLA-DRB1,HSPA1L,LTA | hypersensitivity reaction type IV disease:DDR1,HLA-DQA1,HLA-DRB1,HSPA1L,LTA | hepatitis:HLA-C,HLA-DQA1,HLA-DRB1,HLA-E,LTA…	antigen processing and presentation of exogenous peptide antigen:HLA-C,HLA-DOB,HLA-DQA1,HLA-DRA,HLA-DRB1,HLA-E,TAP2 | antigen processing and presentation of exogenous antigen:HLA-C,HLA-DOB,HLA-DQA1,HLA-DRA,HLA-DRB1,HLA-E,TAP2 | antigen processing and presentation of peptide antigen:HLA-C,HLA-DOB,HLA-DQA1,HLA-DRA,HLA-DRB1,HLA-E,TAP2 | adaptive immune response:HLA-C,HLA-DOB,HLA-DQA1,HLA-DRA,HLA-DRB…	OHP17_all	21.3237	0.0255869	0.0153432	0.0153432	3549	0.164338	0.0567544	2.422	0	0.214576	0.0485362	5.00759	0	0.0781845	0.0992834	0.365527	0	0.504242	0.0522335	21.3237	0.0580652	0.51466	0.0592148	17.4461	0	0.476304	0.095362	6.23096	0.330705	0.0906645
rs57495198:31403594:A:G	6	31403594	6p21.33	G	A	0.999	FALSE	rs145827824:32103749:C:G	0.422257	HCP5 (0 kb, intron/Intron/MODIFIER | nc-RNA/Non coding transcript/MODIFIER); LINC01149 (5.8 kb); MICA (21 kb); HLA-S (54 kb)	11.31	0.645 Heel bone mineral density // 0.595 Bioavailable testosterone levels // 0.585 Neurological blood protein biomarker levels // 0.554 Aspartate aminotransferase levels in low alcohol consumption // 0.517 Blood protein levels	- | ABCF1 | ABHD16A | AGER | AIF1 | APOM | ATF6B | ATP6V1G2 | ATP6V1G2-DDX39B | BAG6 | C2 | C4A | C4B | C4B_2 | C6orf10 | C6orf48 | CCHCR1 | CLIC1 | CSNK2B | DDAH2 | DDR1 | DDX39B | DHX16 | DOM3Z | DXO | EHMT2 | FLOT1 | GPANK1 | GPSM3 | GTF2H4 | HCG22 | HCG23 | HCG27 | HCG4B | HCG4P3 | HCP5 | HLA-A | HLA-B | HLA-C | HLA-DOB | HLA-DQA1 | HLA-DQA2 | HLA-DQB1 | HLA-DQB2 | HLA-DRA | HLA-DRB1 | HLA-DR…	BTN3A2 | C6orf10 | CDC42EP4 | HLA-A | HLA-DQA1 | HLA-DQA2 | HLA-DRB1 | HLA-DRB4 | HLA-DRB5 | HLA-F | HLA-H | HLA-V | IER3 | NHP2 | PARP2 | TAP2 | TMEM154 | XRCC6 | ZNRD1	Systemic lupus erythematosus:HLA-DOB,HLA-DQA1,HLA-DRA,HLA-DRB1 | Antigen processing and presentation:HLA-C,HLA-DOB,HLA-DQA1,HLA-DRA,HLA-DRB1,HLA-E,HSPA1A,HSPA1B,HSPA1L,TAP2 | Allograft rejection:HLA-C,HLA-DOB,HLA-DQA1,HLA-DRA,HLA-DRB1,HLA-E | Type I diabetes mellitus:HLA-C,HLA-DOB,HLA-DQA1,HLA-DRA,HLA-DRB1,HLA-E,LTA | Graft-versus-host disease:HLA-C,HLA-DOB,HLA-DQA1,HLA-DRA,HLA-DRB1,HLA-E | Autoi…	Translocation of ZAP-70 to Immunological synapse:HLA-DQA1,HLA-DRA,HLA-DRB1 | Interferon gamma signaling:HLA-C,HLA-DQA1,HLA-DRA,HLA-DRB1,HLA-E | Generation of second messenger molecules:HLA-DQA1,HLA-DRA,HLA-DRB1 | Phosphorylation of CD3 and TCR zeta chains:HLA-DQA1,HLA-DRA,HLA-DRB1 | PD-1 signaling:HLA-DQA1,HLA-DRA,HLA-DRB1 | Interferon Signaling:HLA-C,HLA-DQA1,HLA-DRA,HLA-DRB1,HLA-E | RNA Polymer…	Kawasaki disease:BAG6,HLA-C,HLA-DRB1,HLA-E,PRRC2A | lymphadenitis:BAG6,HLA-C,HLA-DRB1,HLA-E,PRRC2A | lymph node disease:BAG6,HLA-C,HLA-DRB1,HLA-E,PRRC2A | leprosy:HLA-DRB1,LTA,MICA | Graves' disease:HLA-C,HLA-DQA1,HLA-DRB1,TAP2 | sarcoidosis:DDR1,HLA-DQA1,HLA-DRB1,HSPA1L,LTA | hypersensitivity reaction type IV disease:DDR1,HLA-DQA1,HLA-DRB1,HSPA1L,LTA | hepatitis:HLA-C,HLA-DQA1,HLA-DRB1,HLA-E,LTA…	antigen processing and presentation of exogenous peptide antigen:HLA-C,HLA-DOB,HLA-DQA1,HLA-DRA,HLA-DRB1,HLA-E,TAP2 | antigen processing and presentation of exogenous antigen:HLA-C,HLA-DOB,HLA-DQA1,HLA-DRA,HLA-DRB1,HLA-E,TAP2 | antigen processing and presentation of peptide antigen:HLA-C,HLA-DOB,HLA-DQA1,HLA-DRA,HLA-DRB1,HLA-E,TAP2 | adaptive immune response:HLA-C,HLA-DOB,HLA-DQA1,HLA-DRA,HLA-DRB…	OHP17_all	21.3211	0.0255837	0.0153444	0.0153444	3549	0.164313	0.0567523	2.42155	0	0.214576	0.0485362	5.00759	0	0.0781361	0.099276	0.365274	0	0.504173	0.0522297	21.3211	0.0601021	0.51466	0.0592148	17.4461	0	0.476153	0.095345	6.22941	0.332405	0.0906185
rs1634777:31302880:A:G	6	31302880	6p21.33	G	A	0.994669	FALSE	rs145827824:32103749:C:G	0.356794	HLA-B (19 kb); DHFRP2 (31 kb); RNU6-283P (35 kb); FGFR3P1 (42 kb); ZDHHC20P2 (45 kb); WASF5P (46 kb); HLA-S (47 kb)	1.533	0.615 Neurological blood protein biomarker levels // 0.613 Heel bone mineral density // 0.594 Bioavailable testosterone levels // 0.553 Aspartate aminotransferase levels in low alcohol consumption // 0.544 Blood protein levels	- | ABCF1 | ABHD16A | AGER | AIF1 | APOM | ATF6B | ATP6V1G2 | ATP6V1G2-DDX39B | BAG6 | C2 | C4A | C4B | C4B_2 | C6orf10 | C6orf48 | CCHCR1 | CLIC1 | CSNK2B | DDAH2 | DDR1 | DDX39B | DHX16 | DOM3Z | DXO | FLOT1 | GPANK1 | GPSM3 | GTF2H4 | HCG22 | HCG23 | HCG27 | HCG4B | HCG4P3 | HCP5 | HLA-A | HLA-B | HLA-C | HLA-DOB | HLA-DQA1 | HLA-DQA2 | HLA-DQB1 | HLA-DRA | HLA-DRB1 | HLA-DRB2 | HLA-DRB3 | HLA…	BTN3A2 | C6orf10 | CDC42EP4 | HLA-A | HLA-DQA1 | HLA-DQA2 | HLA-DRB1 | HLA-DRB4 | HLA-DRB5 | HLA-F | HLA-H | HLA-V | IER3 | NHP2 | PARP2 | TAP2 | TMEM154 | XRCC6 | ZNRD1	Systemic lupus erythematosus:HLA-DOB,HLA-DQA1,HLA-DRA,HLA-DRB1 | Antigen processing and presentation:HLA-B,HLA-C,HLA-DOB,HLA-DQA1,HLA-DRA,HLA-DRB1,HLA-E,HSPA1A,HSPA1B,HSPA1L,TAP2 | Allograft rejection:HLA-B,HLA-C,HLA-DOB,HLA-DQA1,HLA-DRA,HLA-DRB1,HLA-E | Type I diabetes mellitus:HLA-B,HLA-C,HLA-DOB,HLA-DQA1,HLA-DRA,HLA-DRB1,HLA-E,LTA | Graft-versus-host disease:HLA-B,HLA-C,HLA-DOB,HLA-DQA1,HLA-DR…	Translocation of ZAP-70 to Immunological synapse:HLA-DQA1,HLA-DRA,HLA-DRB1 | Interferon gamma signaling:HLA-B,HLA-C,HLA-DQA1,HLA-DRA,HLA-DRB1,HLA-E | Generation of second messenger molecules:HLA-DQA1,HLA-DRA,HLA-DRB1 | Phosphorylation of CD3 and TCR zeta chains:HLA-DQA1,HLA-DRA,HLA-DRB1 | PD-1 signaling:HLA-DQA1,HLA-DRA,HLA-DRB1 | Interferon Signaling:HLA-B,HLA-C,HLA-DQA1,HLA-DRA,HLA-DRB1,HLA-E |…	Kawasaki disease:BAG6,HLA-B,HLA-C,HLA-DRB1,HLA-E,PRRC2A | lymphadenitis:BAG6,HLA-B,HLA-C,HLA-DRB1,HLA-E,PRRC2A | lymph node disease:BAG6,HLA-B,HLA-C,HLA-DRB1,HLA-E,PRRC2A | leprosy:HLA-DRB1,LTA | Graves' disease:HLA-B,HLA-C,HLA-DQA1,HLA-DRB1,TAP2 | sarcoidosis:DDR1,HLA-B,HLA-DQA1,HLA-DRB1,HSPA1L,LTA | hypersensitivity reaction type IV disease:DDR1,HLA-B,HLA-DQA1,HLA-DRB1,HSPA1L,LTA | hepatitis:HL…	antigen processing and presentation of exogenous peptide antigen:HLA-B,HLA-C,HLA-DOB,HLA-DQA1,HLA-DRA,HLA-DRB1,HLA-E,TAP2 | antigen processing and presentation of exogenous antigen:HLA-B,HLA-C,HLA-DOB,HLA-DQA1,HLA-DRA,HLA-DRB1,HLA-E,TAP2 | antigen processing and presentation of peptide antigen:HLA-B,HLA-C,HLA-DOB,HLA-DQA1,HLA-DRA,HLA-DRB1,HLA-E,TAP2 | adaptive immune response:HLA-B,HLA-C,HLA-DOB,…	OHP17_all	21.3208	0.0255834	0.0149079	0.0149079	3549	0.165398	0.0581756	2.3499	0	0.212906	0.0493934	4.78793	0	0.0898679	0.101721	0.423679	0	0.511746	0.0530145	21.3208	0.134156	0.526808	0.0601012	17.73	0	0.477623	0.0967508	6.10088	0.178603	0.104342
rs61103100:31403460:C:T	6	31403460	6p21.33	T	C	0.999	FALSE	rs145827824:32103749:C:G	0.422257	HCP5 (0 kb, intron/Intron/MODIFIER | nc-RNA/Non coding transcript/MODIFIER); LINC01149 (6 kb); MICA (20 kb); HLA-S (53 kb)	1.903	0.645 Heel bone mineral density // 0.595 Bioavailable testosterone levels // 0.585 Neurological blood protein biomarker levels // 0.554 Aspartate aminotransferase levels in low alcohol consumption // 0.517 Blood protein levels	- | ABCF1 | ABHD16A | AGER | AIF1 | APOM | ATF6B | ATP6V1G2 | ATP6V1G2-DDX39B | BAG6 | C2 | C4A | C4B | C4B_2 | C6orf10 | C6orf48 | CCHCR1 | CLIC1 | CSNK2B | DDAH2 | DDR1 | DDX39B | DHX16 | DOM3Z | DXO | EHMT2 | FLOT1 | GPANK1 | GPSM3 | GTF2H4 | HCG22 | HCG23 | HCG27 | HCG4B | HCG4P3 | HCP5 | HLA-A | HLA-B | HLA-C | HLA-DOB | HLA-DQA1 | HLA-DQA2 | HLA-DQB1 | HLA-DQB2 | HLA-DRA | HLA-DRB1 | HLA-DR…	BTN3A2 | C6orf10 | CDC42EP4 | HLA-A | HLA-DQA1 | HLA-DQA2 | HLA-DRB1 | HLA-DRB4 | HLA-DRB5 | HLA-F | HLA-H | HLA-V | IER3 | NHP2 | PARP2 | TAP2 | TMEM154 | XRCC6 | ZNRD1	Systemic lupus erythematosus:HLA-DOB,HLA-DQA1,HLA-DRA,HLA-DRB1 | Antigen processing and presentation:HLA-C,HLA-DOB,HLA-DQA1,HLA-DRA,HLA-DRB1,HLA-E,HSPA1A,HSPA1B,HSPA1L,TAP2 | Allograft rejection:HLA-C,HLA-DOB,HLA-DQA1,HLA-DRA,HLA-DRB1,HLA-E | Type I diabetes mellitus:HLA-C,HLA-DOB,HLA-DQA1,HLA-DRA,HLA-DRB1,HLA-E,LTA | Graft-versus-host disease:HLA-C,HLA-DOB,HLA-DQA1,HLA-DRA,HLA-DRB1,HLA-E | Autoi…	Translocation of ZAP-70 to Immunological synapse:HLA-DQA1,HLA-DRA,HLA-DRB1 | Interferon gamma signaling:HLA-C,HLA-DQA1,HLA-DRA,HLA-DRB1,HLA-E | Generation of second messenger molecules:HLA-DQA1,HLA-DRA,HLA-DRB1 | Phosphorylation of CD3 and TCR zeta chains:HLA-DQA1,HLA-DRA,HLA-DRB1 | PD-1 signaling:HLA-DQA1,HLA-DRA,HLA-DRB1 | Interferon Signaling:HLA-C,HLA-DQA1,HLA-DRA,HLA-DRB1,HLA-E | RNA Polymer…	Kawasaki disease:BAG6,HLA-C,HLA-DRB1,HLA-E,PRRC2A | lymphadenitis:BAG6,HLA-C,HLA-DRB1,HLA-E,PRRC2A | lymph node disease:BAG6,HLA-C,HLA-DRB1,HLA-E,PRRC2A | leprosy:HLA-DRB1,LTA,MICA | Graves' disease:HLA-C,HLA-DQA1,HLA-DRB1,TAP2 | sarcoidosis:DDR1,HLA-DQA1,HLA-DRB1,HSPA1L,LTA | hypersensitivity reaction type IV disease:DDR1,HLA-DQA1,HLA-DRB1,HSPA1L,LTA | hepatitis:HLA-C,HLA-DQA1,HLA-DRB1,HLA-E,LTA…	antigen processing and presentation of exogenous peptide antigen:HLA-C,HLA-DOB,HLA-DQA1,HLA-DRA,HLA-DRB1,HLA-E,TAP2 | antigen processing and presentation of exogenous antigen:HLA-C,HLA-DOB,HLA-DQA1,HLA-DRA,HLA-DRB1,HLA-E,TAP2 | antigen processing and presentation of peptide antigen:HLA-C,HLA-DOB,HLA-DQA1,HLA-DRA,HLA-DRB1,HLA-E,TAP2 | adaptive immune response:HLA-C,HLA-DOB,HLA-DQA1,HLA-DRA,HLA-DRB…	OHP17_all	21.3208	0.0255833	0.0153445	0.0153445	3549	0.16431	0.0567521	2.42149	0	0.214576	0.0485362	5.00759	0	0.0781298	0.099275	0.365241	0	0.504165	0.0522292	21.3208	0.060359	0.51466	0.0592148	17.4461	0	0.476133	0.0953425	6.22922	0.332633	0.0906126
rs59674561:31403023:G:T	6	31403023	6p21.33	T	G	0.999	FALSE	rs145827824:32103749:C:G	0.422257	HCP5 (0 kb, intron/Intron/MODIFIER | nc-RNA/Non coding transcript/MODIFIER); LINC01149 (6.4 kb); MICA (20 kb); HLA-S (53 kb)	0.555	0.645 Heel bone mineral density // 0.595 Bioavailable testosterone levels // 0.585 Neurological blood protein biomarker levels // 0.554 Aspartate aminotransferase levels in low alcohol consumption // 0.517 Blood protein levels	- | ABCF1 | ABHD16A | AGER | AIF1 | APOM | ATF6B | ATP6V1G2 | ATP6V1G2-DDX39B | BAG6 | C2 | C4A | C4B | C4B_2 | C6orf10 | C6orf48 | CCHCR1 | CLIC1 | CSNK2B | DDAH2 | DDR1 | DDX39B | DHX16 | DOM3Z | DXO | EHMT2 | FLOT1 | GPANK1 | GPSM3 | GTF2H4 | HCG22 | HCG23 | HCG27 | HCG4B | HCG4P3 | HCP5 | HLA-A | HLA-B | HLA-C | HLA-DOB | HLA-DQA1 | HLA-DQA2 | HLA-DQB1 | HLA-DQB2 | HLA-DRA | HLA-DRB1 | HLA-DR…	BTN3A2 | C6orf10 | CDC42EP4 | HLA-A | HLA-DQA1 | HLA-DQA2 | HLA-DRB1 | HLA-DRB4 | HLA-DRB5 | HLA-F | HLA-H | HLA-V | IER3 | NHP2 | PARP2 | TAP2 | TMEM154 | XRCC6 | ZNRD1	Systemic lupus erythematosus:HLA-DOB,HLA-DQA1,HLA-DRA,HLA-DRB1 | Antigen processing and presentation:HLA-C,HLA-DOB,HLA-DQA1,HLA-DRA,HLA-DRB1,HLA-E,HSPA1A,HSPA1B,HSPA1L,TAP2 | Allograft rejection:HLA-C,HLA-DOB,HLA-DQA1,HLA-DRA,HLA-DRB1,HLA-E | Type I diabetes mellitus:HLA-C,HLA-DOB,HLA-DQA1,HLA-DRA,HLA-DRB1,HLA-E,LTA | Graft-versus-host disease:HLA-C,HLA-DOB,HLA-DQA1,HLA-DRA,HLA-DRB1,HLA-E | Autoi…	Translocation of ZAP-70 to Immunological synapse:HLA-DQA1,HLA-DRA,HLA-DRB1 | Interferon gamma signaling:HLA-C,HLA-DQA1,HLA-DRA,HLA-DRB1,HLA-E | Generation of second messenger molecules:HLA-DQA1,HLA-DRA,HLA-DRB1 | Phosphorylation of CD3 and TCR zeta chains:HLA-DQA1,HLA-DRA,HLA-DRB1 | PD-1 signaling:HLA-DQA1,HLA-DRA,HLA-DRB1 | Interferon Signaling:HLA-C,HLA-DQA1,HLA-DRA,HLA-DRB1,HLA-E | RNA Polymer…	Kawasaki disease:BAG6,HLA-C,HLA-DRB1,HLA-E,PRRC2A | lymphadenitis:BAG6,HLA-C,HLA-DRB1,HLA-E,PRRC2A | lymph node disease:BAG6,HLA-C,HLA-DRB1,HLA-E,PRRC2A | leprosy:HLA-DRB1,LTA,MICA | Graves' disease:HLA-C,HLA-DQA1,HLA-DRB1,TAP2 | sarcoidosis:DDR1,HLA-DQA1,HLA-DRB1,HSPA1L,LTA | hypersensitivity reaction type IV disease:DDR1,HLA-DQA1,HLA-DRB1,HSPA1L,LTA | hepatitis:HLA-C,HLA-DQA1,HLA-DRB1,HLA-E,LTA…	antigen processing and presentation of exogenous peptide antigen:HLA-C,HLA-DOB,HLA-DQA1,HLA-DRA,HLA-DRB1,HLA-E,TAP2 | antigen processing and presentation of exogenous antigen:HLA-C,HLA-DOB,HLA-DQA1,HLA-DRA,HLA-DRB1,HLA-E,TAP2 | antigen processing and presentation of peptide antigen:HLA-C,HLA-DOB,HLA-DQA1,HLA-DRA,HLA-DRB1,HLA-E,TAP2 | adaptive immune response:HLA-C,HLA-DOB,HLA-DQA1,HLA-DRA,HLA-DRB…	OHP17_all	21.3198	0.0255821	0.0153449	0.0153449	3549	0.164301	0.0567513	2.42133	0	0.214576	0.0485362	5.00759	0	0.078112	0.0992722	0.365148	0	0.504139	0.0522278	21.3198	0.0611095	0.51466	0.0592148	17.4461	0	0.476078	0.0953365	6.22864	0.333252	0.0905957
rs111331141:31400947:G:A	6	31400947	6p21.33	A	G	0.999	FALSE	rs145827824:32103749:C:G	0.422257	HCP5 (0 kb, intron/Intron/MODIFIER | nc-RNA/Non coding transcript/MODIFIER); LINC01149 (8.5 kb); MICA (18 kb); HLA-S (51 kb)	3.492	0.645 Heel bone mineral density // 0.595 Bioavailable testosterone levels // 0.585 Neurological blood protein biomarker levels // 0.554 Aspartate aminotransferase levels in low alcohol consumption // 0.517 Blood protein levels	- | ABCF1 | ABHD16A | AGER | AIF1 | APOM | ATF6B | ATP6V1G2 | ATP6V1G2-DDX39B | BAG6 | C2 | C4A | C4B | C4B_2 | C6orf10 | C6orf48 | CCHCR1 | CLIC1 | CSNK2B | DDAH2 | DDR1 | DDX39B | DHX16 | DOM3Z | DXO | EHMT2 | FLOT1 | GPANK1 | GPSM3 | GTF2H4 | HCG22 | HCG23 | HCG27 | HCG4B | HCG4P3 | HCP5 | HLA-A | HLA-B | HLA-C | HLA-DOB | HLA-DQA1 | HLA-DQA2 | HLA-DQB1 | HLA-DQB2 | HLA-DRA | HLA-DRB1 | HLA-DR…	BTN3A2 | C6orf10 | CDC42EP4 | HLA-A | HLA-DQA1 | HLA-DQA2 | HLA-DRB1 | HLA-DRB4 | HLA-DRB5 | HLA-F | HLA-H | HLA-V | IER3 | NHP2 | PARP2 | TAP2 | TMEM154 | XRCC6 | ZNRD1	Systemic lupus erythematosus:HLA-DOB,HLA-DQA1,HLA-DRA,HLA-DRB1 | Antigen processing and presentation:HLA-C,HLA-DOB,HLA-DQA1,HLA-DRA,HLA-DRB1,HLA-E,HSPA1A,HSPA1B,HSPA1L,TAP2 | Allograft rejection:HLA-C,HLA-DOB,HLA-DQA1,HLA-DRA,HLA-DRB1,HLA-E | Type I diabetes mellitus:HLA-C,HLA-DOB,HLA-DQA1,HLA-DRA,HLA-DRB1,HLA-E,LTA | Graft-versus-host disease:HLA-C,HLA-DOB,HLA-DQA1,HLA-DRA,HLA-DRB1,HLA-E | Autoi…	Translocation of ZAP-70 to Immunological synapse:HLA-DQA1,HLA-DRA,HLA-DRB1 | Interferon gamma signaling:HLA-C,HLA-DQA1,HLA-DRA,HLA-DRB1,HLA-E | Generation of second messenger molecules:HLA-DQA1,HLA-DRA,HLA-DRB1 | Phosphorylation of CD3 and TCR zeta chains:HLA-DQA1,HLA-DRA,HLA-DRB1 | PD-1 signaling:HLA-DQA1,HLA-DRA,HLA-DRB1 | Interferon Signaling:HLA-C,HLA-DQA1,HLA-DRA,HLA-DRB1,HLA-E | RNA Polymer…	Kawasaki disease:BAG6,HLA-C,HLA-DRB1,HLA-E,PRRC2A | lymphadenitis:BAG6,HLA-C,HLA-DRB1,HLA-E,PRRC2A | lymph node disease:BAG6,HLA-C,HLA-DRB1,HLA-E,PRRC2A | leprosy:HLA-DRB1,LTA,MICA | Graves' disease:HLA-C,HLA-DQA1,HLA-DRB1,TAP2 | sarcoidosis:DDR1,HLA-DQA1,HLA-DRB1,HSPA1L,LTA | hypersensitivity reaction type IV disease:DDR1,HLA-DQA1,HLA-DRB1,HSPA1L,LTA | hepatitis:HLA-C,HLA-DQA1,HLA-DRB1,HLA-E,LTA…	antigen processing and presentation of exogenous peptide antigen:HLA-C,HLA-DOB,HLA-DQA1,HLA-DRA,HLA-DRB1,HLA-E,TAP2 | antigen processing and presentation of exogenous antigen:HLA-C,HLA-DOB,HLA-DQA1,HLA-DRA,HLA-DRB1,HLA-E,TAP2 | antigen processing and presentation of peptide antigen:HLA-C,HLA-DOB,HLA-DQA1,HLA-DRA,HLA-DRB1,HLA-E,TAP2 | adaptive immune response:HLA-C,HLA-DOB,HLA-DQA1,HLA-DRA,HLA-DRB…	OHP17_all	21.3152	0.0255764	0.0153469	0.0153469	3549	0.164258	0.0567476	2.42053	0	0.214576	0.0485362	5.00759	0	0.0780266	0.0992589	0.364703	0	0.504016	0.052221	21.3152	0.0647387	0.51466	0.0592148	17.4461	0	0.475808	0.095306	6.22587	0.336269	0.0905141
rs61534604:31399450:G:A	6	31399450	6p21.33	A	G	0.999	FALSE	rs145827824:32103749:C:G	0.422257	HCP5 (0 kb, intron/Intron/MODIFIER | nc-RNA/Non coding transcript/MODIFIER); LINC01149 (10 kb); MICA (16 kb); HLA-S (49 kb)	2.845	0.645 Heel bone mineral density // 0.595 Bioavailable testosterone levels // 0.585 Neurological blood protein biomarker levels // 0.554 Aspartate aminotransferase levels in low alcohol consumption // 0.517 Blood protein levels	- | ABCF1 | ABHD16A | AGER | AIF1 | APOM | ATF6B | ATP6V1G2 | ATP6V1G2-DDX39B | BAG6 | C2 | C4A | C4B | C4B_2 | C6orf10 | C6orf48 | CCHCR1 | CLIC1 | CSNK2B | DDAH2 | DDR1 | DDX39B | DHX16 | DOM3Z | DXO | EHMT2 | FLOT1 | GPANK1 | GPSM3 | GTF2H4 | HCG22 | HCG23 | HCG27 | HCG4B | HCG4P3 | HCP5 | HLA-A | HLA-B | HLA-C | HLA-DOB | HLA-DQA1 | HLA-DQA2 | HLA-DQB1 | HLA-DQB2 | HLA-DRA | HLA-DRB1 | HLA-DR…	BTN3A2 | C6orf10 | CDC42EP4 | HLA-A | HLA-DQA1 | HLA-DQA2 | HLA-DRB1 | HLA-DRB4 | HLA-DRB5 | HLA-F | HLA-H | HLA-V | IER3 | NHP2 | PARP2 | TAP2 | TMEM154 | XRCC6 | ZNRD1	Systemic lupus erythematosus:HLA-DOB,HLA-DQA1,HLA-DRA,HLA-DRB1 | Antigen processing and presentation:HLA-C,HLA-DOB,HLA-DQA1,HLA-DRA,HLA-DRB1,HLA-E,HSPA1A,HSPA1B,HSPA1L,TAP2 | Allograft rejection:HLA-C,HLA-DOB,HLA-DQA1,HLA-DRA,HLA-DRB1,HLA-E | Type I diabetes mellitus:HLA-C,HLA-DOB,HLA-DQA1,HLA-DRA,HLA-DRB1,HLA-E,LTA | Graft-versus-host disease:HLA-C,HLA-DOB,HLA-DQA1,HLA-DRA,HLA-DRB1,HLA-E | Autoi…	Translocation of ZAP-70 to Immunological synapse:HLA-DQA1,HLA-DRA,HLA-DRB1 | Interferon gamma signaling:HLA-C,HLA-DQA1,HLA-DRA,HLA-DRB1,HLA-E | Generation of second messenger molecules:HLA-DQA1,HLA-DRA,HLA-DRB1 | Phosphorylation of CD3 and TCR zeta chains:HLA-DQA1,HLA-DRA,HLA-DRB1 | PD-1 signaling:HLA-DQA1,HLA-DRA,HLA-DRB1 | Interferon Signaling:HLA-C,HLA-DQA1,HLA-DRA,HLA-DRB1,HLA-E | RNA Polymer…	Kawasaki disease:BAG6,HLA-C,HLA-DRB1,HLA-E,PRRC2A | lymphadenitis:BAG6,HLA-C,HLA-DRB1,HLA-E,PRRC2A | lymph node disease:BAG6,HLA-C,HLA-DRB1,HLA-E,PRRC2A | leprosy:HLA-DRB1,LTA,MICA | Graves' disease:HLA-C,HLA-DQA1,HLA-DRB1,TAP2 | sarcoidosis:DDR1,HLA-DQA1,HLA-DRB1,HSPA1L,LTA | hypersensitivity reaction type IV disease:DDR1,HLA-DQA1,HLA-DRB1,HSPA1L,LTA | hepatitis:HLA-C,HLA-DQA1,HLA-DRB1,HLA-E,LTA…	antigen processing and presentation of exogenous peptide antigen:HLA-C,HLA-DOB,HLA-DQA1,HLA-DRA,HLA-DRB1,HLA-E,TAP2 | antigen processing and presentation of exogenous antigen:HLA-C,HLA-DOB,HLA-DQA1,HLA-DRA,HLA-DRB1,HLA-E,TAP2 | antigen processing and presentation of peptide antigen:HLA-C,HLA-DOB,HLA-DQA1,HLA-DRA,HLA-DRB1,HLA-E,TAP2 | adaptive immune response:HLA-C,HLA-DOB,HLA-DQA1,HLA-DRA,HLA-DRB…	OHP17_all	21.3121	0.0255727	0.0153482	0.0153482	3549	0.164229	0.0567453	2.42001	0	0.214576	0.0485362	5.00759	0	0.0779715	0.0992502	0.364417	0	0.503936	0.0522166	21.3121	0.06708	0.51466	0.0592148	17.4461	0	0.475632	0.0952862	6.22405	0.338226	0.0904617
rs1619716:31275707:G:A	6	31275707	6p21.33	A	G	0.995669	FALSE	rs145827824:32103749:C:G	0.422257	XXbac-BPG248L24.10 (0 kb, nc-exon/Non coding transcript exon/MODIFIER | nc-RNA/Non coding transcript/MODIFIER); WASF5P (19 kb); RPL3P2 (26 kb); USP8P1 (29 kb); HLA-C (36 kb); HLA-B (46 kb)	6.529	0.645 Heel bone mineral density // 0.595 Bioavailable testosterone levels // 0.585 Neurological blood protein biomarker levels // 0.554 Aspartate aminotransferase levels in low alcohol consumption // 0.517 Blood protein levels	- | ABCF1 | ABHD16A | AGER | AIF1 | APOM | ATF6B | ATP6V1G2 | ATP6V1G2-DDX39B | BAG6 | C2 | C4A | C4B | C4B_2 | C6orf10 | C6orf48 | CCHCR1 | CLIC1 | CSNK2B | DDAH2 | DDR1 | DDX39B | DHX16 | DOM3Z | DXO | EHMT2 | FLOT1 | GPANK1 | GPSM3 | GTF2H4 | HCG22 | HCG27 | HCG4B | HCG4P3 | HCP5 | HLA-A | HLA-B | HLA-C | HLA-DOB | HLA-DQA1 | HLA-DQA2 | HLA-DQB1 | HLA-DQB2 | HLA-DRA | HLA-DRB1 | HLA-DRB2 | HLA…	BTN3A2 | C6orf10 | CDC42EP4 | HLA-A | HLA-DQA1 | HLA-DQA2 | HLA-DRB1 | HLA-DRB4 | HLA-DRB5 | HLA-F | HLA-H | HLA-V | IER3 | NHP2 | PARP2 | TAP2 | TMEM154 | XRCC6 | ZNRD1	Systemic lupus erythematosus:HLA-DOB,HLA-DQA1,HLA-DRA,HLA-DRB1 | Antigen processing and presentation:HLA-B,HLA-C,HLA-DOB,HLA-DQA1,HLA-DRA,HLA-DRB1,HLA-E,HSPA1A,HSPA1B,HSPA1L,TAP2 | Allograft rejection:HLA-B,HLA-C,HLA-DOB,HLA-DQA1,HLA-DRA,HLA-DRB1,HLA-E | Type I diabetes mellitus:HLA-B,HLA-C,HLA-DOB,HLA-DQA1,HLA-DRA,HLA-DRB1,HLA-E,LTA | Graft-versus-host disease:HLA-B,HLA-C,HLA-DOB,HLA-DQA1,HLA-DR…	Translocation of ZAP-70 to Immunological synapse:HLA-DQA1,HLA-DRA,HLA-DRB1 | Interferon gamma signaling:HLA-B,HLA-C,HLA-DQA1,HLA-DRA,HLA-DRB1,HLA-E | Generation of second messenger molecules:HLA-DQA1,HLA-DRA,HLA-DRB1 | Phosphorylation of CD3 and TCR zeta chains:HLA-DQA1,HLA-DRA,HLA-DRB1 | PD-1 signaling:HLA-DQA1,HLA-DRA,HLA-DRB1 | Interferon Signaling:HLA-B,HLA-C,HLA-DQA1,HLA-DRA,HLA-DRB1,HLA-E |…	Kawasaki disease:BAG6,HLA-B,HLA-C,HLA-DRB1,HLA-E,PRRC2A | lymphadenitis:BAG6,HLA-B,HLA-C,HLA-DRB1,HLA-E,PRRC2A | lymph node disease:BAG6,HLA-B,HLA-C,HLA-DRB1,HLA-E,PRRC2A | leprosy:HLA-DRB1,LTA | Graves' disease:HLA-B,HLA-C,HLA-DQA1,HLA-DRB1,TAP2 | sarcoidosis:DDR1,HLA-B,HLA-DQA1,HLA-DRB1,HSPA1L,LTA | hypersensitivity reaction type IV disease:DDR1,HLA-B,HLA-DQA1,HLA-DRB1,HSPA1L,LTA | hepatitis:HL…	antigen processing and presentation of exogenous peptide antigen:HLA-B,HLA-C,HLA-DOB,HLA-DQA1,HLA-DRA,HLA-DRB1,HLA-E,TAP2 | antigen processing and presentation of exogenous antigen:HLA-B,HLA-C,HLA-DOB,HLA-DQA1,HLA-DRA,HLA-DRB1,HLA-E,TAP2 | antigen processing and presentation of peptide antigen:HLA-B,HLA-C,HLA-DOB,HLA-DQA1,HLA-DRA,HLA-DRB1,HLA-E,TAP2 | adaptive immune response:HLA-B,HLA-C,HLA-DOB,…	OHP17_all	21.3021	0.0255604	0.0149032	0.0149032	3549	0.167375	0.058336	2.38556	0	0.212778	0.0494042	4.781	0	0.0931652	0.102278	0.440875	0	0.511595	0.0530233	21.3021	0.129291	0.526611	0.0601129	17.7108	0	0.477545	0.0967616	6.09786	0.177721	0.104305
rs73404226:31407484:T:A	6	31407484	6p21.33	A	T	0.997583	FALSE	rs145827824:32103749:C:G	0.422257	HCP5 (0 kb, intron/Intron/MODIFIER | nc-RNA/Non coding transcript/MODIFIER); LINC01149 (2 kb, near_gene/Upstream gene/MODIFIER); MICA (24 kb); MICB (55 kb)	2.625	0.645 Heel bone mineral density // 0.595 Bioavailable testosterone levels // 0.585 Neurological blood protein biomarker levels // 0.554 Aspartate aminotransferase levels in low alcohol consumption // 0.517 Blood protein levels	- | ABCF1 | ABHD16A | AGER | AIF1 | APOM | ATF6B | ATP6V1G2 | ATP6V1G2-DDX39B | BAG6 | C2 | C4A | C4B | C4B_2 | C6orf10 | C6orf48 | CCHCR1 | CLIC1 | CSNK2B | DDAH2 | DDR1 | DDX39B | DHX16 | DOM3Z | DXO | EHMT2 | FLOT1 | GPANK1 | GPSM3 | GTF2H4 | HCG22 | HCG23 | HCG27 | HCG4B | HCG4P3 | HCP5 | HLA-A | HLA-B | HLA-C | HLA-DOB | HLA-DQA1 | HLA-DQA2 | HLA-DQB1 | HLA-DQB2 | HLA-DRA | HLA-DRB1 | HLA-DR…	BTN3A2 | C6orf10 | CDC42EP4 | HLA-A | HLA-DQA1 | HLA-DQA2 | HLA-DRB1 | HLA-DRB4 | HLA-DRB5 | HLA-F | HLA-H | HLA-V | IER3 | NHP2 | PARP2 | TAP2 | TMEM154 | XRCC6 | ZNRD1	Systemic lupus erythematosus:HLA-DOB,HLA-DQA1,HLA-DRA,HLA-DRB1 | Antigen processing and presentation:HLA-C,HLA-DOB,HLA-DQA1,HLA-DRA,HLA-DRB1,HLA-E,HSPA1A,HSPA1B,HSPA1L,TAP2 | Allograft rejection:HLA-C,HLA-DOB,HLA-DQA1,HLA-DRA,HLA-DRB1,HLA-E | Type I diabetes mellitus:HLA-C,HLA-DOB,HLA-DQA1,HLA-DRA,HLA-DRB1,HLA-E,LTA | Graft-versus-host disease:HLA-C,HLA-DOB,HLA-DQA1,HLA-DRA,HLA-DRB1,HLA-E | Autoi…	Translocation of ZAP-70 to Immunological synapse:HLA-DQA1,HLA-DRA,HLA-DRB1 | Interferon gamma signaling:HLA-C,HLA-DQA1,HLA-DRA,HLA-DRB1,HLA-E | Generation of second messenger molecules:HLA-DQA1,HLA-DRA,HLA-DRB1 | Phosphorylation of CD3 and TCR zeta chains:HLA-DQA1,HLA-DRA,HLA-DRB1 | PD-1 signaling:HLA-DQA1,HLA-DRA,HLA-DRB1 | Interferon Signaling:HLA-C,HLA-DQA1,HLA-DRA,HLA-DRB1,HLA-E | RNA Polymer…	Kawasaki disease:BAG6,HLA-C,HLA-DRB1,HLA-E,PRRC2A | lymphadenitis:BAG6,HLA-C,HLA-DRB1,HLA-E,PRRC2A | lymph node disease:BAG6,HLA-C,HLA-DRB1,HLA-E,PRRC2A | leprosy:HLA-DRB1,LTA,MICA | Graves' disease:HLA-C,HLA-DQA1,HLA-DRB1,TAP2 | sarcoidosis:DDR1,HLA-DQA1,HLA-DRB1,HSPA1L,LTA | hypersensitivity reaction type IV disease:DDR1,HLA-DQA1,HLA-DRB1,HSPA1L,LTA | hepatitis:HLA-C,HLA-DQA1,HLA-DRB1,HLA-E,LTA…	antigen processing and presentation of exogenous peptide antigen:HLA-C,HLA-DOB,HLA-DQA1,HLA-DRA,HLA-DRB1,HLA-E,TAP2 | antigen processing and presentation of exogenous antigen:HLA-C,HLA-DOB,HLA-DQA1,HLA-DRA,HLA-DRB1,HLA-E,TAP2 | antigen processing and presentation of peptide antigen:HLA-C,HLA-DOB,HLA-DQA1,HLA-DRA,HLA-DRB1,HLA-E,TAP2 | adaptive immune response:HLA-C,HLA-DOB,HLA-DQA1,HLA-DRA,HLA-DRB…	OHP17_all	21.1734	0.0254036	0.0152563	0.0152563	3549	0.164158	0.0568744	2.4092	0	0.217497	0.0488538	5.0702	0	0.0783173	0.0993038	0.36622	0	0.504624	0.0524662	21.1734	0.0528146	0.515502	0.0596593	17.253	0	0.476711	0.0954081	6.23513	0.326087	0.0883336
rs2524229:31275231:T:G	6	31275231	6p21.33	G	T	0.992669	FALSE	rs145827824:32103749:C:G	0.422257	XXbac-BPG248L24.10 (0.36 kb, near_gene/Downstream gene/MODIFIER); WASF5P (18 kb); RPL3P2 (26 kb); USP8P1 (29 kb); HLA-C (35 kb); HLA-B (46 kb)	1.432	0.645 Heel bone mineral density // 0.595 Bioavailable testosterone levels // 0.585 Neurological blood protein biomarker levels // 0.554 Aspartate aminotransferase levels in low alcohol consumption // 0.517 Blood protein levels	- | ABCF1 | ABHD16A | AGER | AIF1 | APOM | ATF6B | ATP6V1G2 | ATP6V1G2-DDX39B | BAG6 | C2 | C4A | C4B | C4B_2 | C6orf10 | C6orf48 | CCHCR1 | CLIC1 | CSNK2B | DDAH2 | DDR1 | DDX39B | DHX16 | DOM3Z | DXO | EHMT2 | FLOT1 | GPANK1 | GPSM3 | GTF2H4 | HCG22 | HCG27 | HCG4B | HCG4P3 | HCP5 | HLA-A | HLA-B | HLA-C | HLA-DOB | HLA-DQA1 | HLA-DQA2 | HLA-DQB1 | HLA-DQB2 | HLA-DRA | HLA-DRB1 | HLA-DRB2 | HLA…	BTN3A2 | C6orf10 | CDC42EP4 | HLA-A | HLA-DQA1 | HLA-DQA2 | HLA-DRB1 | HLA-DRB4 | HLA-DRB5 | HLA-F | HLA-H | HLA-V | IER3 | NHP2 | PARP2 | TAP2 | TMEM154 | XRCC6 | ZNRD1	Systemic lupus erythematosus:HLA-DOB,HLA-DQA1,HLA-DRA,HLA-DRB1 | Antigen processing and presentation:HLA-B,HLA-C,HLA-DOB,HLA-DQA1,HLA-DRA,HLA-DRB1,HLA-E,HSPA1A,HSPA1B,HSPA1L,TAP2 | Allograft rejection:HLA-B,HLA-C,HLA-DOB,HLA-DQA1,HLA-DRA,HLA-DRB1,HLA-E | Type I diabetes mellitus:HLA-B,HLA-C,HLA-DOB,HLA-DQA1,HLA-DRA,HLA-DRB1,HLA-E,LTA | Graft-versus-host disease:HLA-B,HLA-C,HLA-DOB,HLA-DQA1,HLA-DR…	Translocation of ZAP-70 to Immunological synapse:HLA-DQA1,HLA-DRA,HLA-DRB1 | Interferon gamma signaling:HLA-B,HLA-C,HLA-DQA1,HLA-DRA,HLA-DRB1,HLA-E | Generation of second messenger molecules:HLA-DQA1,HLA-DRA,HLA-DRB1 | Phosphorylation of CD3 and TCR zeta chains:HLA-DQA1,HLA-DRA,HLA-DRB1 | PD-1 signaling:HLA-DQA1,HLA-DRA,HLA-DRB1 | Interferon Signaling:HLA-B,HLA-C,HLA-DQA1,HLA-DRA,HLA-DRB1,HLA-E |…	Kawasaki disease:BAG6,HLA-B,HLA-C,HLA-DRB1,HLA-E,PRRC2A | lymphadenitis:BAG6,HLA-B,HLA-C,HLA-DRB1,HLA-E,PRRC2A | lymph node disease:BAG6,HLA-B,HLA-C,HLA-DRB1,HLA-E,PRRC2A | leprosy:HLA-DRB1,LTA | Graves' disease:HLA-B,HLA-C,HLA-DQA1,HLA-DRB1,TAP2 | sarcoidosis:DDR1,HLA-B,HLA-DQA1,HLA-DRB1,HSPA1L,LTA | hypersensitivity reaction type IV disease:DDR1,HLA-B,HLA-DQA1,HLA-DRB1,HSPA1L,LTA | hepatitis:HL…	antigen processing and presentation of exogenous peptide antigen:HLA-B,HLA-C,HLA-DOB,HLA-DQA1,HLA-DRA,HLA-DRB1,HLA-E,TAP2 | antigen processing and presentation of exogenous antigen:HLA-B,HLA-C,HLA-DOB,HLA-DQA1,HLA-DRA,HLA-DRB1,HLA-E,TAP2 | antigen processing and presentation of peptide antigen:HLA-B,HLA-C,HLA-DOB,HLA-DQA1,HLA-DRA,HLA-DRB1,HLA-E,TAP2 | adaptive immune response:HLA-B,HLA-C,HLA-DOB,…	OHP17_all	21.1409	0.025364	0.0149481	0.0149481	3549	0.164706	0.0583174	2.32437	0	0.209961	0.0493681	4.67582	0	0.0925297	0.102317	0.436737	0	0.509493	0.0530149	21.1409	0.0505537	0.523109	0.0600788	17.506	0	0.477602	0.0967966	6.09519	0.17888	0.103782
rs181785842:31395214:T:C	6	31395214	6p21.33	C	T	0.969252	FALSE	rs145827824:32103749:C:G	0.377319	HCP5 (0 kb, intron/Intron/MODIFIER | nc-RNA/Non coding transcript/MODIFIER); MICA (12 kb); LINC01149 (14 kb); HLA-S (45 kb); ZDHHC20P2 (47 kb); FGFR3P1 (49 kb)	1.65	0.567 Heel bone mineral density // 0.465 Bioavailable testosterone levels // 0.457 Neurological blood protein biomarker levels // 0.433 Aspartate aminotransferase levels in low alcohol consumption // 0.404 Blood protein levels	- | ABCF1 | ABHD16A | AIF1 | ATF6B | ATP6V1G2 | ATP6V1G2-DDX39B | BAG6 | C2 | C4A | C4B | C4B_2 | C6orf10 | C6orf48 | CCHCR1 | CLIC1 | CSNK2B | DDAH2 | DDR1 | DDX39B | DXO | FLOT1 | GPANK1 | GPSM3 | GTF2H4 | HCG22 | HCG23 | HCG27 | HCG4B | HCG4P3 | HCP5 | HLA-A | HLA-B | HLA-C | HLA-DOB | HLA-DQA1 | HLA-DQA2 | HLA-DQB1 | HLA-DRA | HLA-DRB1 | HLA-DRB2 | HLA-DRB3 | HLA-DRB6 | HLA-DRB7 | HLA-DRB8 | …	BTN3A2 | C6orf10 | HLA-DQA1 | HLA-DRB1 | HLA-DRB4 | HLA-DRB5 | HLA-F | HLA-H | HLA-V | IER3 | NHP2 | PARP2 | TAP2 | TMEM154 | ZNRD1	Systemic lupus erythematosus:HLA-DQA1,HLA-DRA,HLA-DRB1 | Antigen processing and presentation:HLA-C,HLA-DQA1,HLA-DRA,HLA-DRB1,HLA-E,HSPA1A,HSPA1B,HSPA1L,TAP2 | Allograft rejection:HLA-C,HLA-DQA1,HLA-DRA,HLA-DRB1,HLA-E | Type I diabetes mellitus:HLA-C,HLA-DQA1,HLA-DRA,HLA-DRB1,HLA-E,LTA | Graft-versus-host disease:HLA-C,HLA-DQA1,HLA-DRA,HLA-DRB1,HLA-E | Autoimmune thyroid disease:HLA-C,HLA-DQA1,HLA…	Translocation of ZAP-70 to Immunological synapse:HLA-DQA1,HLA-DRA,HLA-DRB1 | Interferon gamma signaling:HLA-C,HLA-DQA1,HLA-DRA,HLA-DRB1,HLA-E | Generation of second messenger molecules:HLA-DQA1,HLA-DRA,HLA-DRB1 | Phosphorylation of CD3 and TCR zeta chains:HLA-DQA1,HLA-DRA,HLA-DRB1 | PD-1 signaling:HLA-DQA1,HLA-DRA,HLA-DRB1 | Interferon Signaling:HLA-C,HLA-DQA1,HLA-DRA,HLA-DRB1,HLA-E | RNA Polymer…	Kawasaki disease:BAG6,HLA-C,HLA-DRB1,HLA-E,PRRC2A | lymphadenitis:BAG6,HLA-C,HLA-DRB1,HLA-E,PRRC2A | lymph node disease:BAG6,HLA-C,HLA-DRB1,HLA-E,PRRC2A | leprosy:HLA-DRB1,LTA,MICA | Graves' disease:HLA-C,HLA-DQA1,HLA-DRB1,TAP2 | sarcoidosis:DDR1,HLA-DQA1,HLA-DRB1,HSPA1L,LTA | hypersensitivity reaction type IV disease:DDR1,HLA-DQA1,HLA-DRB1,HSPA1L,LTA | hepatitis:HLA-C,HLA-DQA1,HLA-DRB1,HLA-E,LTA…	antigen processing and presentation of exogenous peptide antigen:HLA-C,HLA-DQA1,HLA-DRA,HLA-DRB1,HLA-E,TAP2 | antigen processing and presentation of exogenous antigen:HLA-C,HLA-DQA1,HLA-DRA,HLA-DRB1,HLA-E,TAP2 | antigen processing and presentation of peptide antigen:HLA-C,HLA-DQA1,HLA-DRA,HLA-DRB1,HLA-E,TAP2 | adaptive immune response:HLA-C,HLA-DQA1,HLA-DRA,HLA-DRB1,HLA-E,LTA,MICA,TAP2 | antigen …	OHP17_all	21.126	0.0253457	0.0146792	0.0146792	3549	0.174005	0.0589051	2.50348	0	0.224301	0.0505849	5.03413	0	0.0849112	0.102418	0.390334	0	0.521162	0.0542491	21.126	0	0.534151	0.0616455	17.3449	0	0.489418	0.0987198	6.14776	0.182698	0.0868373
rs116226697:31470455:T:C	6	31470455	6p21.33	C	T	0.996	FALSE	rs145827824:32103749:C:G	0.494832	MICB (0 kb, intron/Intron/MODIFIER | near_gene/Downstream gene/MODIFIER | near_gene/Upstream gene/MODIFIER); PPIAP9 (17 kb); HCP5 (25 kb); RPL15P4 (25 kb); MCCD1 (26 kb); ATP6V1G2-DDX39B (28 kb); DDX39B (28 kb); SNORD117 (34 kb); SNORD84 (38 kb); DDX39B-AS1 (40 kb); ATP6V1G2 (42 kb); NFKBIL1 (44 kb)	0.549	0.662 Bioavailable testosterone levels // 0.616 Aspartate aminotransferase levels in low alcohol consumption // 0.616 Neurological blood protein biomarker levels // 0.606 Heel bone mineral density // 0.486 Blood protein levels	- | ABCF1 | ABHD16A | AGER | AIF1 | APOM | ATF6B | ATP6V1G2 | ATP6V1G2-DDX39B | BAG6 | C2 | C4A | C4B | C4B_2 | C6orf10 | C6orf48 | CCHCR1 | CLIC1 | CSNK2B | DDAH2 | DDR1 | DDX39B | DHX16 | DOM3Z | DXO | EHMT2 | FLOT1 | GPANK1 | GPSM3 | GTF2H4 | HCG22 | HCG23 | HCG27 | HCG4B | HCG4P3 | HCP5 | HLA-A | HLA-B | HLA-C | HLA-DOB | HLA-DQA1 | HLA-DQA2 | HLA-DQB1 | HLA-DQB2 | HLA-DRA | HLA-DRB1 | HLA-DR…	BTN3A2 | CDC42EP4 | HLA-A | HLA-DQA1 | HLA-DQA2 | HLA-DRB1 | HLA-DRB4 | HLA-DRB5 | HLA-F | HLA-H | HLA-V | IER3 | NHP2 | PARP2 | PDIA6 | PSMB9 | TAP2 | TMEM154 | XRCC6 | ZNRD1	Systemic lupus erythematosus:HLA-DOB,HLA-DQA1,HLA-DRA,HLA-DRB1 | Antigen processing and presentation:HLA-C,HLA-DOB,HLA-DQA1,HLA-DRA,HLA-DRB1,HLA-E,HSPA1A,HSPA1B,HSPA1L,TAP2 | Allograft rejection:HLA-C,HLA-DOB,HLA-DQA1,HLA-DRA,HLA-DRB1,HLA-E | Type I diabetes mellitus:HLA-C,HLA-DOB,HLA-DQA1,HLA-DRA,HLA-DRB1,HLA-E,LTA | Graft-versus-host disease:HLA-C,HLA-DOB,HLA-DQA1,HLA-DRA,HLA-DRB1,HLA-E | Autoi…	Translocation of ZAP-70 to Immunological synapse:HLA-DQA1,HLA-DRA,HLA-DRB1 | Interferon gamma signaling:HLA-C,HLA-DQA1,HLA-DRA,HLA-DRB1,HLA-E | Generation of second messenger molecules:HLA-DQA1,HLA-DRA,HLA-DRB1 | Phosphorylation of CD3 and TCR zeta chains:HLA-DQA1,HLA-DRA,HLA-DRB1 | PD-1 signaling:HLA-DQA1,HLA-DRA,HLA-DRB1 | Interferon Signaling:HLA-C,HLA-DQA1,HLA-DRA,HLA-DRB1,HLA-E | RNA Polymer…	Kawasaki disease:BAG6,HLA-C,HLA-DRB1,HLA-E,PRRC2A | lymphadenitis:BAG6,HLA-C,HLA-DRB1,HLA-E,PRRC2A | lymph node disease:BAG6,HLA-C,HLA-DRB1,HLA-E,PRRC2A | leprosy:HLA-DRB1,LTA | Graves' disease:HLA-C,HLA-DQA1,HLA-DRB1,TAP2 | sarcoidosis:DDR1,HLA-DQA1,HLA-DRB1,HSPA1L,LTA | hypersensitivity reaction type IV disease:DDR1,HLA-DQA1,HLA-DRB1,HSPA1L,LTA | hepatitis:HLA-C,HLA-DQA1,HLA-DRB1,HLA-E,LTA,MICB…	antigen processing and presentation of exogenous peptide antigen:HLA-C,HLA-DOB,HLA-DQA1,HLA-DRA,HLA-DRB1,HLA-E,TAP2 | antigen processing and presentation of exogenous antigen:HLA-C,HLA-DOB,HLA-DQA1,HLA-DRA,HLA-DRB1,HLA-E,TAP2 | antigen processing and presentation of peptide antigen:HLA-C,HLA-DOB,HLA-DQA1,HLA-DRA,HLA-DRB1,HLA-E,TAP2 | adaptive immune response:HLA-C,HLA-DOB,HLA-DQA1,HLA-DRA,HLA-DRB…	OHP17_all	21.1073	0.0253229	0.0150734	0.0150734	3549	0.129324	0.0576989	1.60201	0	0.21617	0.0485593	5.06954	0	0.0264005	0.102216	0.0989838	0	0.505421	0.0526349	21.1073	0.233687	0.525313	0.0592245	18.1353	0	0.466843	0.0969622	5.83268	0.353978	0.105321
rs113424809:31391262:T:C	6	31391262	6p21.33	C	T	0.989087	FALSE	rs145827824:32103749:C:G	0.422257	HCP5 (0 kb, intron/Intron/MODIFIER | nc-RNA/Non coding transcript/MODIFIER); MICA (8.2 kb); LINC01149 (18 kb); HLA-S (41 kb); ZDHHC20P2 (43 kb); FGFR3P1 (45 kb)	2.478	0.645 Heel bone mineral density // 0.595 Bioavailable testosterone levels // 0.585 Neurological blood protein biomarker levels // 0.554 Aspartate aminotransferase levels in low alcohol consumption // 0.517 Blood protein levels	- | ABCF1 | ABHD16A | AGER | AIF1 | APOM | ATF6B | ATP6V1G2 | ATP6V1G2-DDX39B | BAG6 | C2 | C4A | C4B | C4B_2 | C6orf10 | C6orf48 | CCHCR1 | CLIC1 | CSNK2B | DDAH2 | DDR1 | DDX39B | DHX16 | DOM3Z | DXO | EHMT2 | FLOT1 | GPANK1 | GPSM3 | GTF2H4 | HCG22 | HCG23 | HCG27 | HCG4B | HCG4P3 | HCP5 | HLA-A | HLA-B | HLA-C | HLA-DOB | HLA-DQA1 | HLA-DQA2 | HLA-DQB1 | HLA-DQB2 | HLA-DRA | HLA-DRB1 | HLA-DR…	BTN3A2 | C6orf10 | CDC42EP4 | HLA-A | HLA-DQA1 | HLA-DQA2 | HLA-DRB1 | HLA-DRB4 | HLA-DRB5 | HLA-F | HLA-H | HLA-V | IER3 | NHP2 | PARP2 | TAP2 | TMEM154 | XRCC6 | ZNRD1	Systemic lupus erythematosus:HLA-DOB,HLA-DQA1,HLA-DRA,HLA-DRB1 | Antigen processing and presentation:HLA-C,HLA-DOB,HLA-DQA1,HLA-DRA,HLA-DRB1,HLA-E,HSPA1A,HSPA1B,HSPA1L,TAP2 | Allograft rejection:HLA-C,HLA-DOB,HLA-DQA1,HLA-DRA,HLA-DRB1,HLA-E | Type I diabetes mellitus:HLA-C,HLA-DOB,HLA-DQA1,HLA-DRA,HLA-DRB1,HLA-E,LTA | Graft-versus-host disease:HLA-C,HLA-DOB,HLA-DQA1,HLA-DRA,HLA-DRB1,HLA-E | Autoi…	Translocation of ZAP-70 to Immunological synapse:HLA-DQA1,HLA-DRA,HLA-DRB1 | Interferon gamma signaling:HLA-C,HLA-DQA1,HLA-DRA,HLA-DRB1,HLA-E | Generation of second messenger molecules:HLA-DQA1,HLA-DRA,HLA-DRB1 | Phosphorylation of CD3 and TCR zeta chains:HLA-DQA1,HLA-DRA,HLA-DRB1 | PD-1 signaling:HLA-DQA1,HLA-DRA,HLA-DRB1 | Interferon Signaling:HLA-C,HLA-DQA1,HLA-DRA,HLA-DRB1,HLA-E | RNA Polymer…	Kawasaki disease:BAG6,HLA-C,HLA-DRB1,HLA-E,PRRC2A | lymphadenitis:BAG6,HLA-C,HLA-DRB1,HLA-E,PRRC2A | lymph node disease:BAG6,HLA-C,HLA-DRB1,HLA-E,PRRC2A | leprosy:HLA-DRB1,LTA,MICA | Graves' disease:HLA-C,HLA-DQA1,HLA-DRB1,TAP2 | sarcoidosis:DDR1,HLA-DQA1,HLA-DRB1,HSPA1L,LTA | hypersensitivity reaction type IV disease:DDR1,HLA-DQA1,HLA-DRB1,HSPA1L,LTA | hepatitis:HLA-C,HLA-DQA1,HLA-DRB1,HLA-E,LTA…	antigen processing and presentation of exogenous peptide antigen:HLA-C,HLA-DOB,HLA-DQA1,HLA-DRA,HLA-DRB1,HLA-E,TAP2 | antigen processing and presentation of exogenous antigen:HLA-C,HLA-DOB,HLA-DQA1,HLA-DRA,HLA-DRB1,HLA-E,TAP2 | antigen processing and presentation of peptide antigen:HLA-C,HLA-DOB,HLA-DQA1,HLA-DRA,HLA-DRB1,HLA-E,TAP2 | adaptive immune response:HLA-C,HLA-DOB,HLA-DQA1,HLA-DRA,HLA-DRB…	OHP17_all	21.0999	0.0253139	0.0155971	0.0155971	3549	0.161076	0.0564436	2.36445	0	0.211512	0.0481927	4.94336	0	0.0776399	0.0991962	0.362701	0	0.49928	0.0520049	21.0999	0	0.508329	0.0588561	17.238	0	0.474544	0.0951639	6.21277	0.350122	0.0877226
rs11575837:31560670:C:T	6	31560670	6p21.33	T	C	0.988	FALSE	rs145827824:32103749:C:G	0.494832	NCR3 (0 kb, 5'utr/5 prime UTR/MODIFIER | nc-exon/Non coding transcript exon/MODIFIER | nc-RNA/Non coding transcript/MODIFIER | near_gene/Upstream gene/MODIFIER); LST1 (4 kb, near_gene/Downstream gene/MODIFIER); LTB (10 kb); TNF (15 kb); UQCRHP1 (18 kb); LTA (19 kb); AIF1 (22 kb); PRRC2A (28 kb); SNORA38 (30 kb); NFKBIL1 (34 kb); ATP6V1G2 (44 kb); BAG6 (46 kb); ATP6V1G2-DDX39B (46 kb); DDX39B-AS1 …	7.239	0.662 Bioavailable testosterone levels // 0.616 Aspartate aminotransferase levels in low alcohol consumption // 0.616 Neurological blood protein biomarker levels // 0.606 Heel bone mineral density // 0.486 Blood protein levels	- | ABCF1 | ABHD16A | AGER | AIF1 | APOM | ATF6B | ATP6V1G2 | ATP6V1G2-DDX39B | BAG6 | C2 | C4A | C4B | C4B_2 | C6orf10 | C6orf48 | CCHCR1 | CLIC1 | CSNK2B | DDAH2 | DDR1 | DDX39B | DHX16 | DOM3Z | DXO | EHMT2 | FLOT1 | GPANK1 | GPSM3 | GTF2H4 | HCG22 | HCG23 | HCG27 | HCG4B | HCG4P3 | HCP5 | HLA-A | HLA-B | HLA-C | HLA-DOB | HLA-DQA1 | HLA-DQA2 | HLA-DQB1 | HLA-DQB2 | HLA-DRA | HLA-DRB1 | HLA-DR…	BTN3A2 | CDC42EP4 | HLA-A | HLA-DQA1 | HLA-DQA2 | HLA-DRB1 | HLA-DRB4 | HLA-DRB5 | HLA-F | HLA-H | HLA-V | IER3 | NHP2 | PARP2 | PDIA6 | PSMB9 | TAP2 | TMEM154 | XRCC6 | ZNRD1	Systemic lupus erythematosus:HLA-DOB,HLA-DQA1,HLA-DRA,HLA-DRB1,TNF | Antigen processing and presentation:HLA-C,HLA-DOB,HLA-DQA1,HLA-DRA,HLA-DRB1,HLA-E,HSPA1A,HSPA1B,HSPA1L,TAP2,TNF | Allograft rejection:HLA-C,HLA-DOB,HLA-DQA1,HLA-DRA,HLA-DRB1,HLA-E,TNF | Type I diabetes mellitus:HLA-C,HLA-DOB,HLA-DQA1,HLA-DRA,HLA-DRB1,HLA-E,LTA,TNF | Graft-versus-host disease:HLA-C,HLA-DOB,HLA-DQA1,HLA-DRA,HLA-DR…	Translocation of ZAP-70 to Immunological synapse:HLA-DQA1,HLA-DRA,HLA-DRB1 | Interferon gamma signaling:HLA-C,HLA-DQA1,HLA-DRA,HLA-DRB1,HLA-E | Generation of second messenger molecules:HLA-DQA1,HLA-DRA,HLA-DRB1 | Phosphorylation of CD3 and TCR zeta chains:HLA-DQA1,HLA-DRA,HLA-DRB1 | PD-1 signaling:HLA-DQA1,HLA-DRA,HLA-DRB1 | Interferon Signaling:HLA-C,HLA-DQA1,HLA-DRA,HLA-DRB1,HLA-E | RNA Polymer…	Kawasaki disease:BAG6,HLA-C,HLA-DRB1,HLA-E,PRRC2A,TNF | lymphadenitis:BAG6,HLA-C,HLA-DRB1,HLA-E,PRRC2A,TNF | lymph node disease:BAG6,HLA-C,HLA-DRB1,HLA-E,PRRC2A,TNF | leprosy:HLA-DRB1,LTA,TNF | Graves' disease:HLA-C,HLA-DQA1,HLA-DRB1,TAP2,TNF | sarcoidosis:DDR1,HLA-DQA1,HLA-DRB1,HSPA1L,LTA,TNF | hypersensitivity reaction type IV disease:DDR1,HLA-DQA1,HLA-DRB1,HSPA1L,LTA,TNF | hepatitis:HLA-C,HLA-…	antigen processing and presentation of exogenous peptide antigen:HLA-C,HLA-DOB,HLA-DQA1,HLA-DRA,HLA-DRB1,HLA-E,TAP2 | antigen processing and presentation of exogenous antigen:HLA-C,HLA-DOB,HLA-DQA1,HLA-DRA,HLA-DRB1,HLA-E,TAP2 | antigen processing and presentation of peptide antigen:HLA-C,HLA-DOB,HLA-DQA1,HLA-DRA,HLA-DRB1,HLA-E,TAP2 | adaptive immune response:HLA-C,HLA-DOB,HLA-DQA1,HLA-DRA,HLA-DRB…	OHP17_all	21.0716	0.0252793	0.0151208	0.0151208	3549	0.132553	0.0580946	1.64766	0	0.224765	0.0488438	5.37777	0	0.022741	0.102607	0.0837567	0	0.50669	0.0528137	21.0716	0.338852	0.529825	0.0595278	18.2548	0	0.465045	0.0970357	5.78455	0.333183	0.102881
rs35377600:31632899:C:T	6	31632899	6p21.33	T	C	0.985417	FALSE	rs145827824:32103749:C:G	0.641701	GPANK1 (0 kb, 5'utr/5 prime UTR/MODIFIER | intron/Intron/MODIFIER); CSNK2B (0.11 kb, near_gene/Upstream gene/MODIFIER); CSNK2B-LY6G5B-1181 (0.98 kb, near_gene/Upstream gene/MODIFIER); Y_RNA (1.7 kb, near_gene/Downstream gene/MODIFIER); C6orf47 (4.4 kb, near_gene/Upstream gene/MODIFIER); C6orf47-AS1 (4.4 kb, near_gene/Downstream gene/MODIFIER); LY6G5B (5 kb); APOM (6.9 kb); LY6G5C (12 kb); BAG6 (1…	9.948	0.858 Bioavailable testosterone levels // 0.799 Aspartate aminotransferase levels in low alcohol consumption // 0.488 Neurological blood protein biomarker levels // 0.45 Heel bone mineral density // 0.373 Blood protein levels // 0.303 Ocular sarcoidosis	- | ABCF1 | ABHD16A | AGER | AIF1 | APOM | ATF6B | ATP6V1G2 | ATP6V1G2-DDX39B | BAG6 | BTNL2 | C2 | C4A | C4B | C4B_2 | C6orf10 | C6orf25 | C6orf48 | CCHCR1 | CFB | CLIC1 | CSNK2B | CUTA | DDAH2 | DDR1 | DDX39B | DHX16 | DOM3Z | DXO | EHMT2 | FLOT1 | GPANK1 | GPSM3 | GTF2H4 | HCG22 | HCG23 | HCG27 | HCG4B | HCG4P3 | HCP5 | HLA-A | HLA-B | HLA-C | HLA-DOA | HLA-DOB | HLA-DPA1 | HLA-DQA1 | HLA-DQA2…	ABP1 | BTN3A2 | CCDC69 | EXOC1 | FLOT1 | HLA-DRB1 | HLA-DRB4 | HLA-DRB5 | HLA-F | HLA-G | HLA-H | HLA-V | IER3 | LIMS1 | MDC1 | NHP2 | PARP2 | PSMB9 | SSRP1 | TAP2 | TMEM154 | TRAV12-1 | ZAP70 | ZNF672 | ZNRD1	Systemic lupus erythematosus:HLA-DOB,HLA-DQA1,HLA-DRA,HLA-DRB1 | Antigen processing and presentation:HLA-C,HLA-DOB,HLA-DQA1,HLA-DRA,HLA-DRB1,HLA-E,HSPA1A,HSPA1B,HSPA1L,TAP2 | Allograft rejection:HLA-C,HLA-DOB,HLA-DQA1,HLA-DRA,HLA-DRB1,HLA-E | Type I diabetes mellitus:HLA-C,HLA-DOB,HLA-DQA1,HLA-DRA,HLA-DRB1,HLA-E,LTA | Graft-versus-host disease:HLA-C,HLA-DOB,HLA-DQA1,HLA-DRA,HLA-DRB1,HLA-E | Autoi…	Translocation of ZAP-70 to Immunological synapse:HLA-DQA1,HLA-DRA,HLA-DRB1 | Interferon gamma signaling:HLA-C,HLA-DQA1,HLA-DRA,HLA-DRB1,HLA-E | Generation of second messenger molecules:HLA-DQA1,HLA-DRA,HLA-DRB1 | Phosphorylation of CD3 and TCR zeta chains:HLA-DQA1,HLA-DRA,HLA-DRB1 | PD-1 signaling:HLA-DQA1,HLA-DRA,HLA-DRB1 | Interferon Signaling:HLA-C,HLA-DQA1,HLA-DRA,HLA-DRB1,HLA-E,PSMB8 | RNA P…	Kawasaki disease:ABHD16A,BAG6,HLA-C,HLA-DRB1,HLA-E,PRRC2A | lymphadenitis:ABHD16A,BAG6,HLA-C,HLA-DRB1,HLA-E,PRRC2A | lymph node disease:ABHD16A,BAG6,HLA-C,HLA-DRB1,HLA-E,PRRC2A | leprosy:HLA-DRB1,LTA | Graves' disease:HLA-C,HLA-DQA1,HLA-DRB1,TAP2 | sarcoidosis:DDR1,HLA-DQA1,HLA-DRB1,HSPA1L,LTA | hypersensitivity reaction type IV disease:DDR1,HLA-DQA1,HLA-DRB1,HSPA1L,LTA | hepatitis:APOM,HLA-C,HLA…	antigen processing and presentation of exogenous peptide antigen:HLA-C,HLA-DOB,HLA-DQA1,HLA-DRA,HLA-DRB1,HLA-E,PSMB8,TAP2 | antigen processing and presentation of exogenous antigen:HLA-C,HLA-DOB,HLA-DQA1,HLA-DRA,HLA-DRB1,HLA-E,PSMB8,TAP2 | antigen processing and presentation of peptide antigen:HLA-C,HLA-DOB,HLA-DQA1,HLA-DRA,HLA-DRB1,HLA-E,PSMB8,TAP2 | adaptive immune response:HLA-C,HLA-DOB,HLA-DQ…	OHP17_all	21.0387	0.0252392	0.0173897	0.0173897	3549	0.137225	0.055141	1.89199	0.517751	0.194328	0.0455099	4.70895	0	0.0879601	0.100993	0.415915	0.180906	0.474894	0.0495399	21.0387	0	0.471318	0.0558119	16.5162	0	0.469952	0.0909824	6.62107	0.341324	0.115769
rs147305559:31676659:C:T	6	31676659	6p21.33	T	C	0.982087	FALSE	rs145827824:32103749:C:G	0.692767	XXbac-BPG32J3.20 (0 kb, intron/Intron/MODIFIER); LY6G6F (0 kb, intron/Intron/MODIFIER); MEGT1 (0 kb, intron/Intron/MODIFIER); LY6G6E (2.9 kb, near_gene/Downstream gene/MODIFIER); ABHD16A (5.4 kb); LY6G6D (6.5 kb); MIR4646 (7.8 kb); C6orf25 (9.7 kb); LY6G6C (9.8 kb); DDAH2 (18 kb); CLIC1 (22 kb); LY6G5C (25 kb); MSH5 (31 kb); MSH5-SAPCD1 (31 kb); LY6G5B (35 kb); CSNK2B (39 kb); GPANK1 (43 kb); RNU…	2.389	0.927 Bioavailable testosterone levels // 0.863 Aspartate aminotransferase levels in low alcohol consumption // 0.458 Neurological blood protein biomarker levels // 0.411 Heel bone mineral density // 0.346 Blood protein levels	- | ABCF1 | ABHD16A | AGER | AIF1 | APOM | ATF6B | ATP6V1G2 | ATP6V1G2-DDX39B | BAG6 | BTNL2 | C2 | C4A | C4B | C4B_2 | C6orf10 | C6orf25 | C6orf48 | CCHCR1 | CFB | CLIC1 | CSNK2B | CUTA | DDAH2 | DDR1 | DDX39B | DHX16 | DOM3Z | DXO | EHMT2 | FLOT1 | GPANK1 | GPSM3 | GTF2H4 | HCG22 | HCG23 | HCG27 | HCG4B | HCG4P3 | HCP5 | HLA-A | HLA-B | HLA-C | HLA-DOA | HLA-DOB | HLA-DPA1 | HLA-DQA1 | HLA-DQA2…	ABP1 | BTN3A2 | CCDC69 | EXOC1 | FLOT1 | HLA-DRB1 | HLA-DRB4 | HLA-DRB5 | HLA-F | HLA-H | HLA-V | IER3 | LIMS1 | MDC1 | NHP2 | PARP2 | PSMB9 | SSRP1 | TAP2 | TMEM154 | TRAV12-1 | ZAP70 | ZNF672 | ZNRD1	Systemic lupus erythematosus:HLA-DOB,HLA-DQA1,HLA-DRA,HLA-DRB1 | Antigen processing and presentation:HLA-C,HLA-DOB,HLA-DQA1,HLA-DRA,HLA-DRB1,HLA-E,HSPA1A,HSPA1B,HSPA1L,TAP2 | Allograft rejection:HLA-C,HLA-DOB,HLA-DQA1,HLA-DRA,HLA-DRB1,HLA-E | Type I diabetes mellitus:HLA-C,HLA-DOB,HLA-DQA1,HLA-DRA,HLA-DRB1,HLA-E,LTA | Graft-versus-host disease:HLA-C,HLA-DOB,HLA-DQA1,HLA-DRA,HLA-DRB1,HLA-E | Autoi…	Translocation of ZAP-70 to Immunological synapse:HLA-DQA1,HLA-DRA,HLA-DRB1 | Interferon gamma signaling:HLA-C,HLA-DQA1,HLA-DRA,HLA-DRB1,HLA-E | Generation of second messenger molecules:HLA-DQA1,HLA-DRA,HLA-DRB1 | Phosphorylation of CD3 and TCR zeta chains:HLA-DQA1,HLA-DRA,HLA-DRB1 | PD-1 signaling:HLA-DQA1,HLA-DRA,HLA-DRB1 | Interferon Signaling:HLA-C,HLA-DQA1,HLA-DRA,HLA-DRB1,HLA-E,PSMB8 | RNA P…	Kawasaki disease:ABHD16A,BAG6,HLA-C,HLA-DRB1,HLA-E,PRRC2A | lymphadenitis:ABHD16A,BAG6,HLA-C,HLA-DRB1,HLA-E,PRRC2A | lymph node disease:ABHD16A,BAG6,HLA-C,HLA-DRB1,HLA-E,PRRC2A | leprosy:HLA-DRB1,LTA | Graves' disease:HLA-C,HLA-DQA1,HLA-DRB1,TAP2 | sarcoidosis:DDR1,HLA-DQA1,HLA-DRB1,HSPA1L,LTA | hypersensitivity reaction type IV disease:DDR1,HLA-DQA1,HLA-DRB1,HSPA1L,LTA | hepatitis:HLA-C,HLA-DQA1…	antigen processing and presentation of exogenous peptide antigen:HLA-C,HLA-DOB,HLA-DQA1,HLA-DRA,HLA-DRB1,HLA-E,PSMB8,TAP2 | antigen processing and presentation of exogenous antigen:HLA-C,HLA-DOB,HLA-DQA1,HLA-DRA,HLA-DRB1,HLA-E,PSMB8,TAP2 | antigen processing and presentation of peptide antigen:HLA-C,HLA-DOB,HLA-DQA1,HLA-DRA,HLA-DRB1,HLA-E,PSMB8,TAP2 | adaptive immune response:HLA-C,HLA-DOB,HLA-DQ…	OHP17_all	21.0338	0.0252333	0.0175468	0.0175468	3549	0.130731	0.0548933	1.76346	0.567366	0.18314	0.0450502	4.31891	0.321788	0.0901286	0.101644	0.425698	0.138856	0.473473	0.0493976	21.0338	0	0.458703	0.0553218	15.9516	0	0.484993	0.0915133	6.93703	0.413806	0.115799
rs111242499:31409313:C:T	6	31409313	6p21.33	T	C	0.998583	FALSE	rs145827824:32103749:C:G	0.422257	HCP5 (0 kb, intron/Intron/MODIFIER | nc-RNA/Non coding transcript/MODIFIER); LINC01149 (0.13 kb, near_gene/Upstream gene/MODIFIER); MICA (26 kb); MICB (53 kb)	5.244	0.645 Heel bone mineral density // 0.595 Bioavailable testosterone levels // 0.585 Neurological blood protein biomarker levels // 0.554 Aspartate aminotransferase levels in low alcohol consumption // 0.517 Blood protein levels	- | ABCF1 | ABHD16A | AGER | AIF1 | APOM | ATF6B | ATP6V1G2 | ATP6V1G2-DDX39B | BAG6 | C2 | C4A | C4B | C4B_2 | C6orf10 | C6orf48 | CCHCR1 | CLIC1 | CSNK2B | DDAH2 | DDR1 | DDX39B | DHX16 | DOM3Z | DXO | EHMT2 | FLOT1 | GPANK1 | GPSM3 | GTF2H4 | HCG22 | HCG23 | HCG27 | HCG4B | HCG4P3 | HCP5 | HLA-A | HLA-B | HLA-C | HLA-DOB | HLA-DQA1 | HLA-DQA2 | HLA-DQB1 | HLA-DQB2 | HLA-DRA | HLA-DRB1 | HLA-DR…	BTN3A2 | C6orf10 | CDC42EP4 | HLA-A | HLA-DQA1 | HLA-DQA2 | HLA-DRB1 | HLA-DRB4 | HLA-DRB5 | HLA-F | HLA-H | HLA-V | IER3 | NHP2 | PARP2 | TAP2 | TMEM154 | XRCC6 | ZNRD1	Systemic lupus erythematosus:HLA-DOB,HLA-DQA1,HLA-DRA,HLA-DRB1 | Antigen processing and presentation:HLA-C,HLA-DOB,HLA-DQA1,HLA-DRA,HLA-DRB1,HLA-E,HSPA1A,HSPA1B,HSPA1L,TAP2 | Allograft rejection:HLA-C,HLA-DOB,HLA-DQA1,HLA-DRA,HLA-DRB1,HLA-E | Type I diabetes mellitus:HLA-C,HLA-DOB,HLA-DQA1,HLA-DRA,HLA-DRB1,HLA-E,LTA | Graft-versus-host disease:HLA-C,HLA-DOB,HLA-DQA1,HLA-DRA,HLA-DRB1,HLA-E | Autoi…	Translocation of ZAP-70 to Immunological synapse:HLA-DQA1,HLA-DRA,HLA-DRB1 | Interferon gamma signaling:HLA-C,HLA-DQA1,HLA-DRA,HLA-DRB1,HLA-E | Generation of second messenger molecules:HLA-DQA1,HLA-DRA,HLA-DRB1 | Phosphorylation of CD3 and TCR zeta chains:HLA-DQA1,HLA-DRA,HLA-DRB1 | PD-1 signaling:HLA-DQA1,HLA-DRA,HLA-DRB1 | Interferon Signaling:HLA-C,HLA-DQA1,HLA-DRA,HLA-DRB1,HLA-E | RNA Polymer…	Kawasaki disease:BAG6,HLA-C,HLA-DRB1,HLA-E,PRRC2A | lymphadenitis:BAG6,HLA-C,HLA-DRB1,HLA-E,PRRC2A | lymph node disease:BAG6,HLA-C,HLA-DRB1,HLA-E,PRRC2A | leprosy:HLA-DRB1,LTA,MICA | Graves' disease:HLA-C,HLA-DQA1,HLA-DRB1,TAP2 | sarcoidosis:DDR1,HLA-DQA1,HLA-DRB1,HSPA1L,LTA | hypersensitivity reaction type IV disease:DDR1,HLA-DQA1,HLA-DRB1,HSPA1L,LTA | hepatitis:HLA-C,HLA-DQA1,HLA-DRB1,HLA-E,LTA…	antigen processing and presentation of exogenous peptide antigen:HLA-C,HLA-DOB,HLA-DQA1,HLA-DRA,HLA-DRB1,HLA-E,TAP2 | antigen processing and presentation of exogenous antigen:HLA-C,HLA-DOB,HLA-DQA1,HLA-DRA,HLA-DRB1,HLA-E,TAP2 | antigen processing and presentation of peptide antigen:HLA-C,HLA-DOB,HLA-DQA1,HLA-DRA,HLA-DRB1,HLA-E,TAP2 | adaptive immune response:HLA-C,HLA-DOB,HLA-DQA1,HLA-DRA,HLA-DRB…	OHP17_all	21.0185	0.0252147	0.0151889	0.0151889	3549	0.164113	0.0569167	2.40513	0	0.217964	0.048904	5.0803	0	0.0791661	0.0993881	0.370875	0	0.503523	0.0525526	21.0185	0.0930502	0.512342	0.0597511	17.0025	0	0.478516	0.0955999	6.25507	0.307743	0.0869156
rs79040733:32473007:T:TG	6	32473007	6p21.32	TG	T	0.90085	FALSE	rs145827824:32103749:C:G	0.238005	HLA-DRB5 (12 kb); HLA-DRB9 (32 kb); RNU1-61P (45 kb); HLA-DRB6 (47 kb)		NA	- | AGER | AIF1 | APOM | ATP6V1G2 | B3GALT4 | BAG6 | BRD2 | C4A | C4B | C4B_2 | C6orf10 | CFB | CLIC1 | CSNK2B | CUTA | CYP21A2 | DDAH2 | DOM3Z | DXO | GPSM3 | HCG23 | HCP5 | HLA-DMA | HLA-DMB | HLA-DOA | HLA-DOB | HLA-DPB1 | HLA-DQA1 | HLA-DQA2 | HLA-DQB1 | HLA-DQB1-AS1 | HLA-DQB2 | HLA-DRA | HLA-DRB1 | HLA-DRB4 | HLA-DRB5 | HLA-DRB6 | HLA-DRB9 | HSPA1A | HSPA1B | HSPA1L | LSM2 | LST1 | LTB | LY…	ARHGAP24 | BTN3A2 | CLK3 | DEF8 | EEF1G | EXOC1 | FLOT1 | GOLGA2 | HCP5 | HLA-C | HLA-G | HLA-H | KPNA2 | LIMS1 | LINC00243 | ME2 | NCR3 | RPL34 | SSRP1 | TINF2 | TMEM154 | TOMM22 | TRIM56 | unnamed | VARS2 | XRCC6 | ZNF672	Systemic lupus erythematosus:HLA-DMA,HLA-DOB,HLA-DPB1,HLA-DQA1,HLA-DRA,HLA-DRB1,HLA-DRB5 | Antigen processing and presentation:HLA-DMA,HLA-DOB,HLA-DPB1,HLA-DQA1,HLA-DRA,HLA-DRB1,HLA-DRB5,HSPA1L,TAP2 | Allograft rejection:HLA-DMA,HLA-DOB,HLA-DPB1,HLA-DQA1,HLA-DRA,HLA-DRB1,HLA-DRB5 | Type I diabetes mellitus:HLA-DMA,HLA-DOB,HLA-DPB1,HLA-DQA1,HLA-DRA,HLA-DRB1,HLA-DRB5 | Graft-versus-host disease:HLA…	Translocation of ZAP-70 to Immunological synapse:HLA-DPB1,HLA-DQA1,HLA-DRA,HLA-DRB1,HLA-DRB5 | Interferon gamma signaling:HLA-DPB1,HLA-DQA1,HLA-DRA,HLA-DRB1,HLA-DRB5 | Generation of second messenger molecules:HLA-DPB1,HLA-DQA1,HLA-DRA,HLA-DRB1,HLA-DRB5 | Nonhomologous End-Joining (NHEJ):XRCC6 | Phosphorylation of CD3 and TCR zeta chains:HLA-DPB1,HLA-DQA1,HLA-DRA,HLA-DRB1,HLA-DRB5 | PD-1 signaling…	Kawasaki disease:HLA-DRB1 | lymphadenitis:HLA-DRB1 | lymph node disease:HLA-DRB1 | leprosy:HLA-DRB1 | Graves' disease:HLA-DPB1,HLA-DQA1,HLA-DRB1,TAP2 | sarcoidosis:HLA-DQA1,HLA-DRB1,HSPA1L | hypersensitivity reaction type IV disease:HLA-DQA1,HLA-DRB1,HSPA1L | hepatitis:APOM,HLA-DPB1,HLA-DQA1,HLA-DRB1,PSMB9 | autoimmune disease of endocrine system:HLA-DPB1,HLA-DQA1,HLA-DRB1,TAP2 | hypersensitivity…	antigen processing and presentation of exogenous peptide antigen:HLA-DMA,HLA-DOB,HLA-DPB1,HLA-DQA1,HLA-DRA,HLA-DRB1,HLA-DRB5,PSMB9,TAP2 | antigen processing and presentation of exogenous antigen:HLA-DMA,HLA-DOB,HLA-DPB1,HLA-DQA1,HLA-DRA,HLA-DRB1,HLA-DRB5,PSMB9,TAP2 | antigen processing and presentation of peptide antigen:HLA-DMA,HLA-DOB,HLA-DPB1,HLA-DQA1,HLA-DRA,HLA-DRB1,HLA-DRB5,PSMB9,TAP2 | ada…	OHP17_all	21.0012	0.0251935	0.0120034	0.0120034	3549	0.225992	0.0673871	3.09823	0	0.230994	0.054979	4.5765	0.382885	0.204268	0.12555	0.98405	0	0.584175	0.0609965	21.0012	0.659887	0.481407	0.0678237	11.8974	0	0.740447	0.114738	9.96318	0.59419	0.127262
rs41545814:31382893:A:G	6	31382893	6p21.33	G	A	1	FALSE	rs145827824:32103749:C:G	0.422257	MICA (0 kb, 3'utr/3 prime UTR/MODIFIER); HCP5 (0 kb, intron/Intron/MODIFIER | nc-RNA/Non coding transcript/MODIFIER); LINC01149 (27 kb); HLA-S (33 kb); ZDHHC20P2 (34 kb); FGFR3P1 (37 kb); RNU6-283P (45 kb); DHFRP2 (48 kb)	6.216	0.645 Heel bone mineral density // 0.595 Bioavailable testosterone levels // 0.585 Neurological blood protein biomarker levels // 0.554 Aspartate aminotransferase levels in low alcohol consumption // 0.517 Blood protein levels	- | ABCF1 | ABHD16A | AGER | AIF1 | APOM | ATF6B | ATP6V1G2 | ATP6V1G2-DDX39B | BAG6 | C2 | C4A | C4B | C4B_2 | C6orf10 | C6orf48 | CCHCR1 | CLIC1 | CSNK2B | DDAH2 | DDR1 | DDX39B | DHX16 | DOM3Z | DXO | EHMT2 | FLOT1 | GPANK1 | GPSM3 | GTF2H4 | HCG22 | HCG23 | HCG27 | HCG4B | HCG4P3 | HCP5 | HLA-A | HLA-B | HLA-C | HLA-DOB | HLA-DQA1 | HLA-DQA2 | HLA-DQB1 | HLA-DQB2 | HLA-DRA | HLA-DRB1 | HLA-DR…	BTN3A2 | C6orf10 | CDC42EP4 | HLA-A | HLA-DQA1 | HLA-DQA2 | HLA-DRB1 | HLA-DRB4 | HLA-DRB5 | HLA-F | HLA-H | HLA-V | IER3 | NHP2 | PARP2 | TAP2 | TMEM154 | XRCC6 | ZNRD1	Systemic lupus erythematosus:HLA-DOB,HLA-DQA1,HLA-DRA,HLA-DRB1 | Antigen processing and presentation:HLA-C,HLA-DOB,HLA-DQA1,HLA-DRA,HLA-DRB1,HLA-E,HSPA1A,HSPA1B,HSPA1L,TAP2 | Allograft rejection:HLA-C,HLA-DOB,HLA-DQA1,HLA-DRA,HLA-DRB1,HLA-E | Type I diabetes mellitus:HLA-C,HLA-DOB,HLA-DQA1,HLA-DRA,HLA-DRB1,HLA-E,LTA | Graft-versus-host disease:HLA-C,HLA-DOB,HLA-DQA1,HLA-DRA,HLA-DRB1,HLA-E | Autoi…	Translocation of ZAP-70 to Immunological synapse:HLA-DQA1,HLA-DRA,HLA-DRB1 | Interferon gamma signaling:HLA-C,HLA-DQA1,HLA-DRA,HLA-DRB1,HLA-E | Generation of second messenger molecules:HLA-DQA1,HLA-DRA,HLA-DRB1 | Phosphorylation of CD3 and TCR zeta chains:HLA-DQA1,HLA-DRA,HLA-DRB1 | PD-1 signaling:HLA-DQA1,HLA-DRA,HLA-DRB1 | Interferon Signaling:HLA-C,HLA-DQA1,HLA-DRA,HLA-DRB1,HLA-E | RNA Polymer…	Kawasaki disease:BAG6,HLA-C,HLA-DRB1,HLA-E,PRRC2A | lymphadenitis:BAG6,HLA-C,HLA-DRB1,HLA-E,PRRC2A | lymph node disease:BAG6,HLA-C,HLA-DRB1,HLA-E,PRRC2A | leprosy:HLA-DRB1,LTA,MICA | Graves' disease:HLA-C,HLA-DQA1,HLA-DRB1,TAP2 | sarcoidosis:DDR1,HLA-DQA1,HLA-DRB1,HSPA1L,LTA | hypersensitivity reaction type IV disease:DDR1,HLA-DQA1,HLA-DRB1,HSPA1L,LTA | hepatitis:HLA-C,HLA-DQA1,HLA-DRB1,HLA-E,LTA…	antigen processing and presentation of exogenous peptide antigen:HLA-C,HLA-DOB,HLA-DQA1,HLA-DRA,HLA-DRB1,HLA-E,TAP2 | antigen processing and presentation of exogenous antigen:HLA-C,HLA-DOB,HLA-DQA1,HLA-DRA,HLA-DRB1,HLA-E,TAP2 | antigen processing and presentation of peptide antigen:HLA-C,HLA-DOB,HLA-DQA1,HLA-DRA,HLA-DRB1,HLA-E,TAP2 | adaptive immune response:HLA-C,HLA-DOB,HLA-DQA1,HLA-DRA,HLA-DRB…	OHP17_all	20.9619	0.0251456	0.01592	0.01592	3549	0.155318	0.0555885	2.28358	0	0.20532	0.0474874	4.81404	0	0.0773847	0.0982173	0.365766	0	0.491398	0.0513593	20.9619	0	0.495399	0.0581162	16.8131	0	0.476314	0.0939946	6.39582	0.304433	0.0778313
rs114820425:31524511:G:A	6	31524511	6p21.33	A	G	0.990583	FALSE	rs145827824:32103749:C:G	0.494832	NFKBIL1 (0 kb, exon/Synonymous/LOW | intron/NMD transcript/MODIFIER | intron/Intron/MODIFIER | nc-RNA/Non coding transcript/MODIFIER); ATP6V1G2 (8.3 kb); ATP6V1G2-DDX39B (10 kb); DDX39B-AS1 (14 kb); DDX39B (14 kb); LTA (15 kb); SNORD84 (16 kb); TNF (19 kb); SNORD117 (20 kb); LTB (24 kb); MCCD1 (27 kb); RPL15P4 (28 kb); LST1 (29 kb); NCR3 (32 kb); PPIAP9 (36 kb); MICB (46 kb)	3.42	0.662 Bioavailable testosterone levels // 0.616 Aspartate aminotransferase levels in low alcohol consumption // 0.616 Neurological blood protein biomarker levels // 0.606 Heel bone mineral density // 0.486 Blood protein levels	- | ABCF1 | ABHD16A | AGER | AIF1 | APOM | ATF6B | ATP6V1G2 | ATP6V1G2-DDX39B | BAG6 | C2 | C4A | C4B | C4B_2 | C6orf10 | C6orf48 | CCHCR1 | CLIC1 | CSNK2B | DDAH2 | DDR1 | DDX39B | DHX16 | DOM3Z | DXO | EHMT2 | FLOT1 | GPANK1 | GPSM3 | GTF2H4 | HCG22 | HCG23 | HCG27 | HCG4B | HCG4P3 | HCP5 | HLA-A | HLA-B | HLA-C | HLA-DOB | HLA-DQA1 | HLA-DQA2 | HLA-DQB1 | HLA-DQB2 | HLA-DRA | HLA-DRB1 | HLA-DR…	BTN3A2 | CDC42EP4 | HLA-A | HLA-DQA1 | HLA-DQA2 | HLA-DRB1 | HLA-DRB4 | HLA-DRB5 | HLA-F | HLA-H | HLA-V | IER3 | NHP2 | PARP2 | PDIA6 | PSMB9 | TAP2 | TMEM154 | XRCC6 | ZNRD1	Systemic lupus erythematosus:HLA-DOB,HLA-DQA1,HLA-DRA,HLA-DRB1,TNF | Antigen processing and presentation:HLA-C,HLA-DOB,HLA-DQA1,HLA-DRA,HLA-DRB1,HLA-E,HSPA1A,HSPA1B,HSPA1L,TAP2,TNF | Allograft rejection:HLA-C,HLA-DOB,HLA-DQA1,HLA-DRA,HLA-DRB1,HLA-E,TNF | Type I diabetes mellitus:HLA-C,HLA-DOB,HLA-DQA1,HLA-DRA,HLA-DRB1,HLA-E,LTA,TNF | Graft-versus-host disease:HLA-C,HLA-DOB,HLA-DQA1,HLA-DRA,HLA-DR…	Translocation of ZAP-70 to Immunological synapse:HLA-DQA1,HLA-DRA,HLA-DRB1 | Interferon gamma signaling:HLA-C,HLA-DQA1,HLA-DRA,HLA-DRB1,HLA-E | Generation of second messenger molecules:HLA-DQA1,HLA-DRA,HLA-DRB1 | Phosphorylation of CD3 and TCR zeta chains:HLA-DQA1,HLA-DRA,HLA-DRB1 | PD-1 signaling:HLA-DQA1,HLA-DRA,HLA-DRB1 | Interferon Signaling:HLA-C,HLA-DQA1,HLA-DRA,HLA-DRB1,HLA-E | RNA Polymer…	Kawasaki disease:BAG6,HLA-C,HLA-DRB1,HLA-E,PRRC2A,TNF | lymphadenitis:BAG6,HLA-C,HLA-DRB1,HLA-E,PRRC2A,TNF | lymph node disease:BAG6,HLA-C,HLA-DRB1,HLA-E,PRRC2A,TNF | leprosy:HLA-DRB1,LTA,TNF | Graves' disease:HLA-C,HLA-DQA1,HLA-DRB1,TAP2,TNF | sarcoidosis:DDR1,HLA-DQA1,HLA-DRB1,HSPA1L,LTA,TNF | hypersensitivity reaction type IV disease:DDR1,HLA-DQA1,HLA-DRB1,HSPA1L,LTA,TNF | hepatitis:HLA-C,HLA-…	antigen processing and presentation of exogenous peptide antigen:HLA-C,HLA-DOB,HLA-DQA1,HLA-DRA,HLA-DRB1,HLA-E,TAP2 | antigen processing and presentation of exogenous antigen:HLA-C,HLA-DOB,HLA-DQA1,HLA-DRA,HLA-DRB1,HLA-E,TAP2 | antigen processing and presentation of peptide antigen:HLA-C,HLA-DOB,HLA-DQA1,HLA-DRA,HLA-DRB1,HLA-E,TAP2 | adaptive immune response:HLA-C,HLA-DOB,HLA-DQA1,HLA-DRA,HLA-DRB…	OHP17_all	20.9487	0.0251294	0.0151525	0.0151525	3549	0.129885	0.0578786	1.60509	0	0.218891	0.0486814	5.16044	0	0.0259627	0.102381	0.0970121	0	0.504158	0.0527104	20.9487	0.26274	0.525824	0.0593549	18.0929	0	0.464171	0.0969896	5.76994	0.311408	0.102203
rs143088059:31521457:T:C	6	31521457	6p21.33	C	T	0.991165	FALSE	rs145827824:32103749:C:G	0.494832	NFKBIL1 (0 kb, intron/NMD transcript/MODIFIER | intron/Intron/MODIFIER | nc-RNA/Non coding transcript/MODIFIER); ATP6V1G2 (5.3 kb); ATP6V1G2-DDX39B (7.1 kb); DDX39B-AS1 (11 kb); DDX39B (11 kb); SNORD84 (13 kb); SNORD117 (17 kb); LTA (18 kb); TNF (22 kb); MCCD1 (23 kb); RPL15P4 (25 kb); LTB (27 kb); LST1 (32 kb); PPIAP9 (33 kb); NCR3 (35 kb); MICB (43 kb)	4.647	0.662 Bioavailable testosterone levels // 0.616 Aspartate aminotransferase levels in low alcohol consumption // 0.616 Neurological blood protein biomarker levels // 0.606 Heel bone mineral density // 0.486 Blood protein levels	- | ABCF1 | ABHD16A | AGER | AIF1 | APOM | ATF6B | ATP6V1G2 | ATP6V1G2-DDX39B | BAG6 | C2 | C4A | C4B | C4B_2 | C6orf10 | C6orf48 | CCHCR1 | CLIC1 | CSNK2B | DDAH2 | DDR1 | DDX39B | DHX16 | DOM3Z | DXO | EHMT2 | FLOT1 | GPANK1 | GPSM3 | GTF2H4 | HCG22 | HCG23 | HCG27 | HCG4B | HCG4P3 | HCP5 | HLA-A | HLA-B | HLA-C | HLA-DOB | HLA-DQA1 | HLA-DQA2 | HLA-DQB1 | HLA-DQB2 | HLA-DRA | HLA-DRB1 | HLA-DR…	BTN3A2 | CDC42EP4 | HLA-A | HLA-DQA1 | HLA-DQA2 | HLA-DRB1 | HLA-DRB4 | HLA-DRB5 | HLA-F | HLA-H | HLA-V | IER3 | NHP2 | PARP2 | PDIA6 | PSMB9 | TAP2 | TMEM154 | XRCC6 | ZNRD1	Systemic lupus erythematosus:HLA-DOB,HLA-DQA1,HLA-DRA,HLA-DRB1,TNF | Antigen processing and presentation:HLA-C,HLA-DOB,HLA-DQA1,HLA-DRA,HLA-DRB1,HLA-E,HSPA1A,HSPA1B,HSPA1L,TAP2,TNF | Allograft rejection:HLA-C,HLA-DOB,HLA-DQA1,HLA-DRA,HLA-DRB1,HLA-E,TNF | Type I diabetes mellitus:HLA-C,HLA-DOB,HLA-DQA1,HLA-DRA,HLA-DRB1,HLA-E,LTA,TNF | Graft-versus-host disease:HLA-C,HLA-DOB,HLA-DQA1,HLA-DRA,HLA-DR…	Translocation of ZAP-70 to Immunological synapse:HLA-DQA1,HLA-DRA,HLA-DRB1 | Interferon gamma signaling:HLA-C,HLA-DQA1,HLA-DRA,HLA-DRB1,HLA-E | Generation of second messenger molecules:HLA-DQA1,HLA-DRA,HLA-DRB1 | Phosphorylation of CD3 and TCR zeta chains:HLA-DQA1,HLA-DRA,HLA-DRB1 | PD-1 signaling:HLA-DQA1,HLA-DRA,HLA-DRB1 | Interferon Signaling:HLA-C,HLA-DQA1,HLA-DRA,HLA-DRB1,HLA-E | RNA Polymer…	Kawasaki disease:BAG6,HLA-C,HLA-DRB1,HLA-E,PRRC2A,TNF | lymphadenitis:BAG6,HLA-C,HLA-DRB1,HLA-E,PRRC2A,TNF | lymph node disease:BAG6,HLA-C,HLA-DRB1,HLA-E,PRRC2A,TNF | leprosy:HLA-DRB1,LTA,TNF | Graves' disease:HLA-C,HLA-DQA1,HLA-DRB1,TAP2,TNF | sarcoidosis:DDR1,HLA-DQA1,HLA-DRB1,HSPA1L,LTA,TNF | hypersensitivity reaction type IV disease:DDR1,HLA-DQA1,HLA-DRB1,HSPA1L,LTA,TNF | hepatitis:HLA-C,HLA-…	antigen processing and presentation of exogenous peptide antigen:HLA-C,HLA-DOB,HLA-DQA1,HLA-DRA,HLA-DRB1,HLA-E,TAP2 | antigen processing and presentation of exogenous antigen:HLA-C,HLA-DOB,HLA-DQA1,HLA-DRA,HLA-DRB1,HLA-E,TAP2 | antigen processing and presentation of peptide antigen:HLA-C,HLA-DOB,HLA-DQA1,HLA-DRA,HLA-DRB1,HLA-E,TAP2 | adaptive immune response:HLA-C,HLA-DOB,HLA-DQA1,HLA-DRA,HLA-DRB…	OHP17_all	20.9081	0.02508	0.0151709	0.0151709	3549	0.128818	0.0578075	1.58748	0	0.217336	0.0486024	5.11018	0	0.0260252	0.102378	0.0972706	0	0.503227	0.0526662	20.9081	0.234737	0.524195	0.0592717	18.0343	0	0.464151	0.0969889	5.76959	0.311218	0.101645
rs142985952:31519902:G:A	6	31519902	6p21.33	A	G	0.992165	FALSE	rs145827824:32103749:C:G	0.494832	NFKBIL1 (0 kb, intron/NMD transcript/MODIFIER | intron/Intron/MODIFIER | nc-RNA/Non coding transcript/MODIFIER); ATP6V1G2 (3.7 kb, near_gene/Upstream gene/MODIFIER); ATP6V1G2-DDX39B (5.5 kb); DDX39B-AS1 (9 kb); DDX39B (9.7 kb); SNORD84 (11 kb); SNORD117 (16 kb); LTA (20 kb); MCCD1 (22 kb); RPL15P4 (23 kb); TNF (23 kb); LTB (28 kb); PPIAP9 (32 kb); LST1 (34 kb); NCR3 (37 kb); MICB (41 kb)	0.54	0.662 Bioavailable testosterone levels // 0.616 Aspartate aminotransferase levels in low alcohol consumption // 0.616 Neurological blood protein biomarker levels // 0.606 Heel bone mineral density // 0.486 Blood protein levels	- | ABCF1 | ABHD16A | AGER | AIF1 | APOM | ATF6B | ATP6V1G2 | ATP6V1G2-DDX39B | BAG6 | C2 | C4A | C4B | C4B_2 | C6orf10 | C6orf48 | CCHCR1 | CLIC1 | CSNK2B | DDAH2 | DDR1 | DDX39B | DHX16 | DOM3Z | DXO | EHMT2 | FLOT1 | GPANK1 | GPSM3 | GTF2H4 | HCG22 | HCG23 | HCG27 | HCG4B | HCG4P3 | HCP5 | HLA-A | HLA-B | HLA-C | HLA-DOB | HLA-DQA1 | HLA-DQA2 | HLA-DQB1 | HLA-DQB2 | HLA-DRA | HLA-DRB1 | HLA-DR…	BTN3A2 | CDC42EP4 | HLA-A | HLA-DQA1 | HLA-DQA2 | HLA-DRB1 | HLA-DRB4 | HLA-DRB5 | HLA-F | HLA-H | HLA-V | IER3 | NHP2 | PARP2 | PDIA6 | PSMB9 | TAP2 | TMEM154 | XRCC6 | ZNRD1	Systemic lupus erythematosus:HLA-DOB,HLA-DQA1,HLA-DRA,HLA-DRB1,TNF | Antigen processing and presentation:HLA-C,HLA-DOB,HLA-DQA1,HLA-DRA,HLA-DRB1,HLA-E,HSPA1A,HSPA1B,HSPA1L,TAP2,TNF | Allograft rejection:HLA-C,HLA-DOB,HLA-DQA1,HLA-DRA,HLA-DRB1,HLA-E,TNF | Type I diabetes mellitus:HLA-C,HLA-DOB,HLA-DQA1,HLA-DRA,HLA-DRB1,HLA-E,LTA,TNF | Graft-versus-host disease:HLA-C,HLA-DOB,HLA-DQA1,HLA-DRA,HLA-DR…	Translocation of ZAP-70 to Immunological synapse:HLA-DQA1,HLA-DRA,HLA-DRB1 | Interferon gamma signaling:HLA-C,HLA-DQA1,HLA-DRA,HLA-DRB1,HLA-E | Generation of second messenger molecules:HLA-DQA1,HLA-DRA,HLA-DRB1 | Phosphorylation of CD3 and TCR zeta chains:HLA-DQA1,HLA-DRA,HLA-DRB1 | PD-1 signaling:HLA-DQA1,HLA-DRA,HLA-DRB1 | Interferon Signaling:HLA-C,HLA-DQA1,HLA-DRA,HLA-DRB1,HLA-E | RNA Polymer…	Kawasaki disease:BAG6,HLA-C,HLA-DRB1,HLA-E,PRRC2A,TNF | lymphadenitis:BAG6,HLA-C,HLA-DRB1,HLA-E,PRRC2A,TNF | lymph node disease:BAG6,HLA-C,HLA-DRB1,HLA-E,PRRC2A,TNF | leprosy:HLA-DRB1,LTA,TNF | Graves' disease:HLA-C,HLA-DQA1,HLA-DRB1,TAP2,TNF | sarcoidosis:DDR1,HLA-DQA1,HLA-DRB1,HSPA1L,LTA,TNF | hypersensitivity reaction type IV disease:DDR1,HLA-DQA1,HLA-DRB1,HSPA1L,LTA,TNF | hepatitis:HLA-C,HLA-…	antigen processing and presentation of exogenous peptide antigen:HLA-C,HLA-DOB,HLA-DQA1,HLA-DRA,HLA-DRB1,HLA-E,TAP2 | antigen processing and presentation of exogenous antigen:HLA-C,HLA-DOB,HLA-DQA1,HLA-DRA,HLA-DRB1,HLA-E,TAP2 | antigen processing and presentation of peptide antigen:HLA-C,HLA-DOB,HLA-DQA1,HLA-DRA,HLA-DRB1,HLA-E,TAP2 | adaptive immune response:HLA-C,HLA-DOB,HLA-DQA1,HLA-DRA,HLA-DRB…	OHP17_all	20.885	0.0250518	0.0151805	0.0151805	3549	0.128261	0.0577667	1.57845	0	0.216527	0.0485581	5.08462	0	0.0260439	0.102374	0.0973516	0	0.502696	0.052641	20.885	0.218066	0.523294	0.0592253	18.0021	0	0.464113	0.0969863	5.76901	0.3108	0.101353
rs149245335:31507937:C:T	6	31507937	6p21.33	T	C	0.994165	FALSE	rs145827824:32103749:C:G	0.494832	ATP6V1G2-DDX39B (0 kb, intron/NMD transcript/MODIFIER | intron/Intron/MODIFIER | near_gene/Downstream gene/MODIFIER); DDX39B (0 kb, intron/Intron/MODIFIER | nc-RNA/Non coding transcript/MODIFIER | near_gene/Upstream gene/MODIFIER); SNORD84 (0.94 kb, near_gene/Downstream gene/MODIFIER); DDX39B-AS1 (2.1 kb, near_gene/Upstream gene/MODIFIER); SNORD117 (3.7 kb, near_gene/Upstream gene/MODIFIER); ATP6…	2.757	0.662 Bioavailable testosterone levels // 0.616 Aspartate aminotransferase levels in low alcohol consumption // 0.616 Neurological blood protein biomarker levels // 0.606 Heel bone mineral density // 0.486 Blood protein levels	- | ABCF1 | ABHD16A | AGER | AIF1 | APOM | ATF6B | ATP6V1G2 | ATP6V1G2-DDX39B | BAG6 | C2 | C4A | C4B | C4B_2 | C6orf10 | C6orf48 | CCHCR1 | CLIC1 | CSNK2B | DDAH2 | DDR1 | DDX39B | DHX16 | DOM3Z | DXO | EHMT2 | FLOT1 | GPANK1 | GPSM3 | GTF2H4 | HCG22 | HCG23 | HCG27 | HCG4B | HCG4P3 | HCP5 | HLA-A | HLA-B | HLA-C | HLA-DOB | HLA-DQA1 | HLA-DQA2 | HLA-DQB1 | HLA-DQB2 | HLA-DRA | HLA-DRB1 | HLA-DR…	BTN3A2 | CDC42EP4 | HLA-A | HLA-DQA1 | HLA-DQA2 | HLA-DRB1 | HLA-DRB4 | HLA-DRB5 | HLA-F | HLA-H | HLA-V | IER3 | NHP2 | PARP2 | PDIA6 | PSMB9 | TAP2 | TMEM154 | XRCC6 | ZNRD1	Systemic lupus erythematosus:HLA-DOB,HLA-DQA1,HLA-DRA,HLA-DRB1,TNF | Antigen processing and presentation:HLA-C,HLA-DOB,HLA-DQA1,HLA-DRA,HLA-DRB1,HLA-E,HSPA1A,HSPA1B,HSPA1L,TAP2,TNF | Allograft rejection:HLA-C,HLA-DOB,HLA-DQA1,HLA-DRA,HLA-DRB1,HLA-E,TNF | Type I diabetes mellitus:HLA-C,HLA-DOB,HLA-DQA1,HLA-DRA,HLA-DRB1,HLA-E,LTA,TNF | Graft-versus-host disease:HLA-C,HLA-DOB,HLA-DQA1,HLA-DRA,HLA-DR…	Translocation of ZAP-70 to Immunological synapse:HLA-DQA1,HLA-DRA,HLA-DRB1 | Interferon gamma signaling:HLA-C,HLA-DQA1,HLA-DRA,HLA-DRB1,HLA-E | Generation of second messenger molecules:HLA-DQA1,HLA-DRA,HLA-DRB1 | Phosphorylation of CD3 and TCR zeta chains:HLA-DQA1,HLA-DRA,HLA-DRB1 | PD-1 signaling:HLA-DQA1,HLA-DRA,HLA-DRB1 | Interferon Signaling:HLA-C,HLA-DQA1,HLA-DRA,HLA-DRB1,HLA-E | RNA Polymer…	Kawasaki disease:BAG6,HLA-C,HLA-DRB1,HLA-E,PRRC2A,TNF | lymphadenitis:BAG6,HLA-C,HLA-DRB1,HLA-E,PRRC2A,TNF | lymph node disease:BAG6,HLA-C,HLA-DRB1,HLA-E,PRRC2A,TNF | leprosy:HLA-DRB1,LTA,TNF | Graves' disease:HLA-C,HLA-DQA1,HLA-DRB1,TAP2,TNF | sarcoidosis:DDR1,HLA-DQA1,HLA-DRB1,HSPA1L,LTA,TNF | hypersensitivity reaction type IV disease:DDR1,HLA-DQA1,HLA-DRB1,HSPA1L,LTA,TNF | hepatitis:HLA-C,HLA-…	antigen processing and presentation of exogenous peptide antigen:HLA-C,HLA-DOB,HLA-DQA1,HLA-DRA,HLA-DRB1,HLA-E,TAP2 | antigen processing and presentation of exogenous antigen:HLA-C,HLA-DOB,HLA-DQA1,HLA-DRA,HLA-DRB1,HLA-E,TAP2 | antigen processing and presentation of peptide antigen:HLA-C,HLA-DOB,HLA-DQA1,HLA-DRA,HLA-DRB1,HLA-E,TAP2 | adaptive immune response:HLA-C,HLA-DOB,HLA-DQA1,HLA-DRA,HLA-DRB…	OHP17_all	20.8769	0.0250418	0.0151715	0.0151715	3549	0.128334	0.057707	1.58243	0	0.216037	0.0485125	5.07269	0	0.0266627	0.102311	0.0999624	0	0.502287	0.0526089	20.8769	0.205313	0.522815	0.0591767	17.9988	0	0.463743	0.0969602	5.76354	0.306638	0.101654
rs78957773:31496949:C:T	6	31496949	6p21.33	T	C	0.995165	FALSE	rs145827824:32103749:C:G	0.494832	MCCD1 (0 kb, exon/Missense/MODERATE); RPL15P4 (0.48 kb, near_gene/Downstream gene/MODIFIER); DDX39B (1 kb, near_gene/Downstream gene/MODIFIER); ATP6V1G2-DDX39B (1 kb, near_gene/Downstream gene/MODIFIER); SNORD117 (7.2 kb); PPIAP9 (8.9 kb); SNORD84 (12 kb); DDX39B-AS1 (13 kb); ATP6V1G2 (15 kb); NFKBIL1 (18 kb); MICB (18 kb); LTA (43 kb); TNF (46 kb)	0.604	0.662 Bioavailable testosterone levels // 0.616 Aspartate aminotransferase levels in low alcohol consumption // 0.616 Neurological blood protein biomarker levels // 0.606 Heel bone mineral density // 0.486 Blood protein levels	- | ABCF1 | ABHD16A | AGER | AIF1 | APOM | ATF6B | ATP6V1G2 | ATP6V1G2-DDX39B | BAG6 | C2 | C4A | C4B | C4B_2 | C6orf10 | C6orf48 | CCHCR1 | CLIC1 | CSNK2B | DDAH2 | DDR1 | DDX39B | DHX16 | DOM3Z | DXO | EHMT2 | FLOT1 | GPANK1 | GPSM3 | GTF2H4 | HCG22 | HCG23 | HCG27 | HCG4B | HCG4P3 | HCP5 | HLA-A | HLA-B | HLA-C | HLA-DOB | HLA-DQA1 | HLA-DQA2 | HLA-DQB1 | HLA-DQB2 | HLA-DRA | HLA-DRB1 | HLA-DR…	BTN3A2 | CDC42EP4 | HLA-A | HLA-DQA1 | HLA-DQA2 | HLA-DRB1 | HLA-DRB4 | HLA-DRB5 | HLA-F | HLA-H | HLA-V | IER3 | NHP2 | PARP2 | PDIA6 | PSMB9 | TAP2 | TMEM154 | XRCC6 | ZNRD1	Systemic lupus erythematosus:HLA-DOB,HLA-DQA1,HLA-DRA,HLA-DRB1,TNF | Antigen processing and presentation:HLA-C,HLA-DOB,HLA-DQA1,HLA-DRA,HLA-DRB1,HLA-E,HSPA1A,HSPA1B,HSPA1L,TAP2,TNF | Allograft rejection:HLA-C,HLA-DOB,HLA-DQA1,HLA-DRA,HLA-DRB1,HLA-E,TNF | Type I diabetes mellitus:HLA-C,HLA-DOB,HLA-DQA1,HLA-DRA,HLA-DRB1,HLA-E,LTA,TNF | Graft-versus-host disease:HLA-C,HLA-DOB,HLA-DQA1,HLA-DRA,HLA-DR…	Translocation of ZAP-70 to Immunological synapse:HLA-DQA1,HLA-DRA,HLA-DRB1 | Interferon gamma signaling:HLA-C,HLA-DQA1,HLA-DRA,HLA-DRB1,HLA-E | Generation of second messenger molecules:HLA-DQA1,HLA-DRA,HLA-DRB1 | Phosphorylation of CD3 and TCR zeta chains:HLA-DQA1,HLA-DRA,HLA-DRB1 | PD-1 signaling:HLA-DQA1,HLA-DRA,HLA-DRB1 | Interferon Signaling:HLA-C,HLA-DQA1,HLA-DRA,HLA-DRB1,HLA-E | RNA Polymer…	Kawasaki disease:BAG6,HLA-C,HLA-DRB1,HLA-E,PRRC2A,TNF | lymphadenitis:BAG6,HLA-C,HLA-DRB1,HLA-E,PRRC2A,TNF | lymph node disease:BAG6,HLA-C,HLA-DRB1,HLA-E,PRRC2A,TNF | leprosy:HLA-DRB1,LTA,TNF | Graves' disease:HLA-C,HLA-DQA1,HLA-DRB1,TAP2,TNF | sarcoidosis:DDR1,HLA-DQA1,HLA-DRB1,HSPA1L,LTA,TNF | hypersensitivity reaction type IV disease:DDR1,HLA-DQA1,HLA-DRB1,HSPA1L,LTA,TNF | hepatitis:HLA-C,HLA-…	antigen processing and presentation of exogenous peptide antigen:HLA-C,HLA-DOB,HLA-DQA1,HLA-DRA,HLA-DRB1,HLA-E,TAP2 | antigen processing and presentation of exogenous antigen:HLA-C,HLA-DOB,HLA-DQA1,HLA-DRA,HLA-DRB1,HLA-E,TAP2 | antigen processing and presentation of peptide antigen:HLA-C,HLA-DOB,HLA-DQA1,HLA-DRA,HLA-DRB1,HLA-E,TAP2 | adaptive immune response:HLA-C,HLA-DOB,HLA-DQA1,HLA-DRA,HLA-DRB…	OHP17_all	20.8724	0.0250363	0.0151529	0.0151529	3549	0.128995	0.0576818	1.59635	0	0.216176	0.0485146	5.07808	0	0.0275104	0.102221	0.103566	0	0.50215	0.0526005	20.8724	0.203571	0.522969	0.0591788	18.0077	0	0.463139	0.0969197	5.75439	0.301822	0.102131
rs116527642:32432289:G:A	6	32432289	6p21.32	A	G	0.996	FALSE	rs145827824:32103749:C:G	0.520094	HLA-DRB9 (0 kb, intron/Intron/MODIFIER | nc-RNA/Non coding transcript/MODIFIER); HLA-DRA (19 kb); HLA-DRB5 (53 kb); BTNL2 (57 kb)	0.957	0.404 Bioavailable testosterone levels	- | ABHD16A | AGER | AIF1 | APOM | ATF6B | ATP6V1G2 | B3GALT4 | BAG6 | BRD2 | C4A | C4B | C4B_2 | C6orf10 | C6orf25 | C6orf48 | CFB | CLIC1 | CSNK2B | CUTA | CYP21A2 | DDAH2 | DDR1 | DXO | FLOT1 | GPANK1 | GPSM3 | HCG23 | HCG27 | HCP5 | HLA-C | HLA-DMA | HLA-DOA | HLA-DOB | HLA-DPA1 | HLA-DPB1 | HLA-DQA1 | HLA-DQA2 | HLA-DQB1 | HLA-DQB1-AS1 | HLA-DQB2 | HLA-DRA | HLA-DRB1 | HLA-DRB4 | HLA-DRB5 | …	ABP1 | ARHGAP24 | BTN3A2 | CLK3 | DEF8 | EEF1G | EXOC1 | FLOT1 | GOLGA2 | HLA-C | HLA-G | HLA-H | IER3 | KPNA2 | LIMS1 | LINC00243 | MDC1 | ME2 | NCR3 | RPL34 | SSRP1 | TINF2 | TMEM154 | unnamed | VARS2 | XRCC6 | ZNF672 | ZNRD1	Systemic lupus erythematosus:C4A,C4B,HLA-DOB,HLA-DQA1,HLA-DQA2,HLA-DQB1,HLA-DRA,HLA-DRB1,HLA-DRB5 | Antigen processing and presentation:HLA-C,HLA-DOB,HLA-DQA1,HLA-DQA2,HLA-DQB1,HLA-DRA,HLA-DRB1,HLA-DRB5,HSPA1A,HSPA1B,HSPA1L,TAP2 | Allograft rejection:HLA-C,HLA-DOB,HLA-DQA1,HLA-DQA2,HLA-DQB1,HLA-DRA,HLA-DRB1,HLA-DRB5 | Type I diabetes mellitus:HLA-C,HLA-DOB,HLA-DQA1,HLA-DQA2,HLA-DQB1,HLA-DRA,HLA-D…	Translocation of ZAP-70 to Immunological synapse:HLA-DQA1,HLA-DQA2,HLA-DQB1,HLA-DQB2,HLA-DRA,HLA-DRB1,HLA-DRB5 | Interferon gamma signaling:HLA-C,HLA-DQA1,HLA-DQA2,HLA-DQB1,HLA-DQB2,HLA-DRA,HLA-DRB1,HLA-DRB5 | Generation of second messenger molecules:HLA-DQA1,HLA-DQA2,HLA-DQB1,HLA-DQB2,HLA-DRA,HLA-DRB1,HLA-DRB5 | Phosphorylation of CD3 and TCR zeta chains:HLA-DQA1,HLA-DQA2,HLA-DQB1,HLA-DQB2,HLA-D…	Kawasaki disease:BTNL2,HLA-C,HLA-DRB1,PRRC2A | lymphadenitis:BTNL2,HLA-C,HLA-DRB1,PRRC2A | lymph node disease:BTNL2,HLA-C,HLA-DRB1,PRRC2A | leprosy:BTNL2,HLA-DQB1,HLA-DRB1 | Graves' disease:HLA-C,HLA-DQA1,HLA-DQB1,HLA-DRB1,TAP2 | sarcoidosis:AGER,BTNL2,HLA-DQA1,HLA-DQB1,HLA-DRB1,HSPA1L | hypersensitivity reaction type IV disease:AGER,BTNL2,HLA-DQA1,HLA-DQB1,HLA-DRB1,HSPA1L | hepatitis:HLA-C,HLA-D…	antigen processing and presentation of exogenous peptide antigen:HLA-C,HLA-DOB,HLA-DQA1,HLA-DQA2,HLA-DQB1,HLA-DQB2,HLA-DRA,HLA-DRB1,HLA-DRB5,PSMB9,TAP2 | antigen processing and presentation of exogenous antigen:HLA-C,HLA-DOB,HLA-DQA1,HLA-DQA2,HLA-DQB1,HLA-DQB2,HLA-DRA,HLA-DRB1,HLA-DRB5,PSMB9,TAP2 | antigen processing and presentation of peptide antigen:HLA-C,HLA-DOB,HLA-DQA1,HLA-DQA2,HLA-DQB1,HLA…	OHP17_all	20.8219	0.0249747	0.0100165	0.0100165	3549	0.231418	0.0702292	3.0072	0	0.213342	0.0566243	3.78312	0.257236	0.23552	0.13174	1.13186	0.0235337	0.605013	0.0634556	20.8219	0.73427	0.471788	0.069811	10.8544	0	0.817345	0.12133	10.7925	0.679404	0.101606
6:32437622:T:G	6	32437622	6p21.32	G	T	0.995	FALSE	rs145827824:32103749:C:G	0.520094	HLA-DRB9 (0 kb, intron/Intron/MODIFIER | nc-RNA/Non coding transcript/MODIFIER); HLA-DRA (25 kb); HLA-DRB5 (47 kb); BTNL2 (63 kb)		0.404 Bioavailable testosterone levels	- | ABHD16A | AGER | AIF1 | APOM | ATF6B | ATP6V1G2 | B3GALT4 | BAG6 | BRD2 | C4A | C4B | C4B_2 | C6orf10 | C6orf25 | C6orf48 | CFB | CLIC1 | CSNK2B | CYP21A2 | DDAH2 | DDR1 | DXO | FLOT1 | GPANK1 | GPSM3 | HCG23 | HCG27 | HCP5 | HLA-C | HLA-DMA | HLA-DOA | HLA-DOB | HLA-DPA1 | HLA-DPB1 | HLA-DQA1 | HLA-DQA2 | HLA-DQB1 | HLA-DQB1-AS1 | HLA-DQB2 | HLA-DRA | HLA-DRB1 | HLA-DRB4 | HLA-DRB5 | HLA-DRB…	ABP1 | ARHGAP24 | BTN3A2 | CLK3 | DEF8 | EEF1G | EXOC1 | FLOT1 | GOLGA2 | HLA-C | HLA-G | HLA-H | IER3 | KPNA2 | LIMS1 | LINC00243 | MDC1 | ME2 | NCR3 | RPL34 | SSRP1 | TINF2 | TMEM154 | unnamed | VARS2 | XRCC6 | ZNF672 | ZNRD1	Systemic lupus erythematosus:C4A,C4B,HLA-DOB,HLA-DQA1,HLA-DQA2,HLA-DQB1,HLA-DRA,HLA-DRB1,HLA-DRB5 | Antigen processing and presentation:HLA-C,HLA-DOB,HLA-DQA1,HLA-DQA2,HLA-DQB1,HLA-DRA,HLA-DRB1,HLA-DRB5,HSPA1A,HSPA1B,HSPA1L,TAP2 | Allograft rejection:HLA-C,HLA-DOB,HLA-DQA1,HLA-DQA2,HLA-DQB1,HLA-DRA,HLA-DRB1,HLA-DRB5 | Type I diabetes mellitus:HLA-C,HLA-DOB,HLA-DQA1,HLA-DQA2,HLA-DQB1,HLA-DRA,HLA-D…	Translocation of ZAP-70 to Immunological synapse:HLA-DQA1,HLA-DQA2,HLA-DQB1,HLA-DQB2,HLA-DRA,HLA-DRB1,HLA-DRB5 | Interferon gamma signaling:HLA-C,HLA-DQA1,HLA-DQA2,HLA-DQB1,HLA-DQB2,HLA-DRA,HLA-DRB1,HLA-DRB5 | Generation of second messenger molecules:HLA-DQA1,HLA-DQA2,HLA-DQB1,HLA-DQB2,HLA-DRA,HLA-DRB1,HLA-DRB5 | Phosphorylation of CD3 and TCR zeta chains:HLA-DQA1,HLA-DQA2,HLA-DQB1,HLA-DQB2,HLA-D…	Kawasaki disease:BTNL2,HLA-C,HLA-DRB1,PRRC2A | lymphadenitis:BTNL2,HLA-C,HLA-DRB1,PRRC2A | lymph node disease:BTNL2,HLA-C,HLA-DRB1,PRRC2A | leprosy:BTNL2,HLA-DQB1,HLA-DRB1 | Graves' disease:HLA-C,HLA-DQA1,HLA-DQB1,HLA-DRB1,TAP2 | sarcoidosis:AGER,BTNL2,HLA-DQA1,HLA-DQB1,HLA-DRB1,HSPA1L | hypersensitivity reaction type IV disease:AGER,BTNL2,HLA-DQA1,HLA-DQB1,HLA-DRB1,HSPA1L | hepatitis:HLA-C,HLA-D…	antigen processing and presentation of exogenous peptide antigen:HLA-C,HLA-DOB,HLA-DQA1,HLA-DQA2,HLA-DQB1,HLA-DQB2,HLA-DRA,HLA-DRB1,HLA-DRB5,PSMB9,TAP2 | antigen processing and presentation of exogenous antigen:HLA-C,HLA-DOB,HLA-DQA1,HLA-DQA2,HLA-DQB1,HLA-DQB2,HLA-DRA,HLA-DRB1,HLA-DRB5,PSMB9,TAP2 | antigen processing and presentation of peptide antigen:HLA-C,HLA-DOB,HLA-DQA1,HLA-DQA2,HLA-DQB1,HLA…	OHP17_all	20.8194	0.0249715	0.0100148	0.0100148	3549	0.231354	0.0702296	3.00575	0	0.213206	0.0566255	3.7788	0.259835	0.23552	0.13174	1.13186	0.0235337	0.604983	0.0634565	20.8194	0.734386	0.471723	0.0698127	10.8511	0	0.817345	0.12133	10.7925	0.679404	0.101653
6:32438752:ACT:A	6	32438752	6p21.32	A	ACT	0.995	FALSE	rs145827824:32103749:C:G	0.520094	HLA-DRB9 (0 kb); HLA-DRA (26 kb); HLA-DRB5 (46 kb); BTNL2 (64 kb)		0.404 Bioavailable testosterone levels	- | ABHD16A | AGER | AIF1 | APOM | ATF6B | ATP6V1G2 | B3GALT4 | BAG6 | BRD2 | C4A | C4B | C4B_2 | C6orf10 | C6orf25 | C6orf48 | CFB | CLIC1 | CSNK2B | CYP21A2 | DDAH2 | DDR1 | DXO | FLOT1 | GPANK1 | GPSM3 | HCG23 | HCG27 | HCP5 | HLA-C | HLA-DMA | HLA-DOA | HLA-DOB | HLA-DPA1 | HLA-DPB1 | HLA-DQA1 | HLA-DQA2 | HLA-DQB1 | HLA-DQB1-AS1 | HLA-DQB2 | HLA-DRA | HLA-DRB1 | HLA-DRB4 | HLA-DRB5 | HLA-DRB…	ABP1 | ARHGAP24 | BTN3A2 | CLK3 | DEF8 | EEF1G | EXOC1 | FLOT1 | GOLGA2 | HLA-C | HLA-G | HLA-H | IER3 | KPNA2 | LIMS1 | LINC00243 | MDC1 | ME2 | NCR3 | RPL34 | SSRP1 | TINF2 | TMEM154 | unnamed | VARS2 | XRCC6 | ZNF672 | ZNRD1	Systemic lupus erythematosus:C4A,C4B,HLA-DOB,HLA-DQA1,HLA-DQA2,HLA-DQB1,HLA-DRA,HLA-DRB1,HLA-DRB5 | Antigen processing and presentation:HLA-C,HLA-DOB,HLA-DQA1,HLA-DQA2,HLA-DQB1,HLA-DRA,HLA-DRB1,HLA-DRB5,HSPA1A,HSPA1B,HSPA1L,TAP2 | Allograft rejection:HLA-C,HLA-DOB,HLA-DQA1,HLA-DQA2,HLA-DQB1,HLA-DRA,HLA-DRB1,HLA-DRB5 | Type I diabetes mellitus:HLA-C,HLA-DOB,HLA-DQA1,HLA-DQA2,HLA-DQB1,HLA-DRA,HLA-D…	Translocation of ZAP-70 to Immunological synapse:HLA-DQA1,HLA-DQA2,HLA-DQB1,HLA-DQB2,HLA-DRA,HLA-DRB1,HLA-DRB5 | Interferon gamma signaling:HLA-C,HLA-DQA1,HLA-DQA2,HLA-DQB1,HLA-DQB2,HLA-DRA,HLA-DRB1,HLA-DRB5 | Generation of second messenger molecules:HLA-DQA1,HLA-DQA2,HLA-DQB1,HLA-DQB2,HLA-DRA,HLA-DRB1,HLA-DRB5 | Phosphorylation of CD3 and TCR zeta chains:HLA-DQA1,HLA-DQA2,HLA-DQB1,HLA-DQB2,HLA-D…	Kawasaki disease:BTNL2,HLA-C,HLA-DRB1,PRRC2A | lymphadenitis:BTNL2,HLA-C,HLA-DRB1,PRRC2A | lymph node disease:BTNL2,HLA-C,HLA-DRB1,PRRC2A | leprosy:BTNL2,HLA-DQB1,HLA-DRB1 | Graves' disease:HLA-C,HLA-DQA1,HLA-DQB1,HLA-DRB1,TAP2 | sarcoidosis:AGER,BTNL2,HLA-DQA1,HLA-DQB1,HLA-DRB1,HSPA1L | hypersensitivity reaction type IV disease:AGER,BTNL2,HLA-DQA1,HLA-DQB1,HLA-DRB1,HSPA1L | hepatitis:HLA-C,HLA-D…	antigen processing and presentation of exogenous peptide antigen:HLA-C,HLA-DOB,HLA-DQA1,HLA-DQA2,HLA-DQB1,HLA-DQB2,HLA-DRA,HLA-DRB1,HLA-DRB5,PSMB9,TAP2 | antigen processing and presentation of exogenous antigen:HLA-C,HLA-DOB,HLA-DQA1,HLA-DQA2,HLA-DQB1,HLA-DQB2,HLA-DRA,HLA-DRB1,HLA-DRB5,PSMB9,TAP2 | antigen processing and presentation of peptide antigen:HLA-C,HLA-DOB,HLA-DQA1,HLA-DQA2,HLA-DQB1,HLA…	OHP17_all	20.8187	0.0249708	0.0100144	0.0100144	3549	0.231338	0.0702299	3.00538	0	0.213173	0.0566258	3.77776	0.260461	0.23552	0.13174	1.13186	0.0235337	0.604975	0.0634566	20.8187	0.734417	0.471706	0.069813	10.8503	0	0.817345	0.12133	10.7925	0.679404	0.101665
rs144698006:32438744:C:T	6	32438744	6p21.32	T	C	0.995	FALSE	rs145827824:32103749:C:G	0.520094	HLA-DRB9 (0 kb, intron/Intron/MODIFIER | nc-RNA/Non coding transcript/MODIFIER); HLA-DRA (26 kb); HLA-DRB5 (46 kb); BTNL2 (64 kb)	2.078	0.404 Bioavailable testosterone levels	- | ABHD16A | AGER | AIF1 | APOM | ATF6B | ATP6V1G2 | B3GALT4 | BAG6 | BRD2 | C4A | C4B | C4B_2 | C6orf10 | C6orf25 | C6orf48 | CFB | CLIC1 | CSNK2B | CUTA | CYP21A2 | DDAH2 | DDR1 | DXO | FLOT1 | GPANK1 | GPSM3 | HCG23 | HCG27 | HCP5 | HLA-C | HLA-DMA | HLA-DOA | HLA-DOB | HLA-DPA1 | HLA-DPB1 | HLA-DQA1 | HLA-DQA2 | HLA-DQB1 | HLA-DQB1-AS1 | HLA-DQB2 | HLA-DRA | HLA-DRB1 | HLA-DRB4 | HLA-DRB5 | …	ABP1 | ARHGAP24 | BTN3A2 | CLK3 | DEF8 | EEF1G | EXOC1 | FLOT1 | GOLGA2 | HLA-C | HLA-G | HLA-H | IER3 | KPNA2 | LIMS1 | LINC00243 | MDC1 | ME2 | NCR3 | RPL34 | SSRP1 | TINF2 | TMEM154 | unnamed | VARS2 | XRCC6 | ZNF672 | ZNRD1	Systemic lupus erythematosus:C4A,C4B,HLA-DOB,HLA-DQA1,HLA-DQA2,HLA-DQB1,HLA-DRA,HLA-DRB1,HLA-DRB5 | Antigen processing and presentation:HLA-C,HLA-DOB,HLA-DQA1,HLA-DQA2,HLA-DQB1,HLA-DRA,HLA-DRB1,HLA-DRB5,HSPA1A,HSPA1B,HSPA1L,TAP2 | Allograft rejection:HLA-C,HLA-DOB,HLA-DQA1,HLA-DQA2,HLA-DQB1,HLA-DRA,HLA-DRB1,HLA-DRB5 | Type I diabetes mellitus:HLA-C,HLA-DOB,HLA-DQA1,HLA-DQA2,HLA-DQB1,HLA-DRA,HLA-D…	Translocation of ZAP-70 to Immunological synapse:HLA-DQA1,HLA-DQA2,HLA-DQB1,HLA-DQB2,HLA-DRA,HLA-DRB1,HLA-DRB5 | Interferon gamma signaling:HLA-C,HLA-DQA1,HLA-DQA2,HLA-DQB1,HLA-DQB2,HLA-DRA,HLA-DRB1,HLA-DRB5 | Generation of second messenger molecules:HLA-DQA1,HLA-DQA2,HLA-DQB1,HLA-DQB2,HLA-DRA,HLA-DRB1,HLA-DRB5 | Phosphorylation of CD3 and TCR zeta chains:HLA-DQA1,HLA-DQA2,HLA-DQB1,HLA-DQB2,HLA-D…	Kawasaki disease:BTNL2,HLA-C,HLA-DRB1,PRRC2A | lymphadenitis:BTNL2,HLA-C,HLA-DRB1,PRRC2A | lymph node disease:BTNL2,HLA-C,HLA-DRB1,PRRC2A | leprosy:BTNL2,HLA-DQB1,HLA-DRB1 | Graves' disease:HLA-C,HLA-DQA1,HLA-DQB1,HLA-DRB1,TAP2 | sarcoidosis:AGER,BTNL2,HLA-DQA1,HLA-DQB1,HLA-DRB1,HSPA1L | hypersensitivity reaction type IV disease:AGER,BTNL2,HLA-DQA1,HLA-DQB1,HLA-DRB1,HSPA1L | hepatitis:HLA-C,HLA-D…	antigen processing and presentation of exogenous peptide antigen:HLA-C,HLA-DOB,HLA-DQA1,HLA-DQA2,HLA-DQB1,HLA-DQB2,HLA-DRA,HLA-DRB1,HLA-DRB5,PSMB9,TAP2 | antigen processing and presentation of exogenous antigen:HLA-C,HLA-DOB,HLA-DQA1,HLA-DQA2,HLA-DQB1,HLA-DQB2,HLA-DRA,HLA-DRB1,HLA-DRB5,PSMB9,TAP2 | antigen processing and presentation of peptide antigen:HLA-C,HLA-DOB,HLA-DQA1,HLA-DQA2,HLA-DQB1,HLA…	OHP17_all	20.8187	0.0249708	0.0100144	0.0100144	3549	0.231338	0.0702299	3.00538	0	0.213173	0.0566258	3.77776	0.260461	0.23552	0.13174	1.13186	0.0235337	0.604975	0.0634566	20.8187	0.734417	0.471706	0.069813	10.8503	0	0.817345	0.12133	10.7925	0.679404	0.101665
rs180843960:32438751:T:A	6	32438751	6p21.32	A	T	0.995	FALSE	rs145827824:32103749:C:G	0.520094	HLA-DRB9 (0 kb, intron/Intron/MODIFIER | nc-RNA/Non coding transcript/MODIFIER); HLA-DRA (26 kb); HLA-DRB5 (46 kb); BTNL2 (64 kb)	4.071	0.404 Bioavailable testosterone levels	- | ABHD16A | AGER | AIF1 | APOM | ATF6B | ATP6V1G2 | B3GALT4 | BAG6 | BRD2 | C4A | C4B | C4B_2 | C6orf10 | C6orf25 | C6orf48 | CFB | CLIC1 | CSNK2B | CUTA | CYP21A2 | DDAH2 | DDR1 | DXO | FLOT1 | GPANK1 | GPSM3 | HCG23 | HCG27 | HCP5 | HLA-C | HLA-DMA | HLA-DOA | HLA-DOB | HLA-DPA1 | HLA-DPB1 | HLA-DQA1 | HLA-DQA2 | HLA-DQB1 | HLA-DQB1-AS1 | HLA-DQB2 | HLA-DRA | HLA-DRB1 | HLA-DRB4 | HLA-DRB5 | …	ABP1 | ARHGAP24 | BTN3A2 | CLK3 | DEF8 | EEF1G | EXOC1 | FLOT1 | GOLGA2 | HLA-C | HLA-G | HLA-H | IER3 | KPNA2 | LIMS1 | LINC00243 | MDC1 | ME2 | NCR3 | RPL34 | SSRP1 | TINF2 | TMEM154 | unnamed | VARS2 | XRCC6 | ZNF672 | ZNRD1	Systemic lupus erythematosus:C4A,C4B,HLA-DOB,HLA-DQA1,HLA-DQA2,HLA-DQB1,HLA-DRA,HLA-DRB1,HLA-DRB5 | Antigen processing and presentation:HLA-C,HLA-DOB,HLA-DQA1,HLA-DQA2,HLA-DQB1,HLA-DRA,HLA-DRB1,HLA-DRB5,HSPA1A,HSPA1B,HSPA1L,TAP2 | Allograft rejection:HLA-C,HLA-DOB,HLA-DQA1,HLA-DQA2,HLA-DQB1,HLA-DRA,HLA-DRB1,HLA-DRB5 | Type I diabetes mellitus:HLA-C,HLA-DOB,HLA-DQA1,HLA-DQA2,HLA-DQB1,HLA-DRA,HLA-D…	Translocation of ZAP-70 to Immunological synapse:HLA-DQA1,HLA-DQA2,HLA-DQB1,HLA-DQB2,HLA-DRA,HLA-DRB1,HLA-DRB5 | Interferon gamma signaling:HLA-C,HLA-DQA1,HLA-DQA2,HLA-DQB1,HLA-DQB2,HLA-DRA,HLA-DRB1,HLA-DRB5 | Generation of second messenger molecules:HLA-DQA1,HLA-DQA2,HLA-DQB1,HLA-DQB2,HLA-DRA,HLA-DRB1,HLA-DRB5 | Phosphorylation of CD3 and TCR zeta chains:HLA-DQA1,HLA-DQA2,HLA-DQB1,HLA-DQB2,HLA-D…	Kawasaki disease:BTNL2,HLA-C,HLA-DRB1,PRRC2A | lymphadenitis:BTNL2,HLA-C,HLA-DRB1,PRRC2A | lymph node disease:BTNL2,HLA-C,HLA-DRB1,PRRC2A | leprosy:BTNL2,HLA-DQB1,HLA-DRB1 | Graves' disease:HLA-C,HLA-DQA1,HLA-DQB1,HLA-DRB1,TAP2 | sarcoidosis:AGER,BTNL2,HLA-DQA1,HLA-DQB1,HLA-DRB1,HSPA1L | hypersensitivity reaction type IV disease:AGER,BTNL2,HLA-DQA1,HLA-DQB1,HLA-DRB1,HSPA1L | hepatitis:HLA-C,HLA-D…	antigen processing and presentation of exogenous peptide antigen:HLA-C,HLA-DOB,HLA-DQA1,HLA-DQA2,HLA-DQB1,HLA-DQB2,HLA-DRA,HLA-DRB1,HLA-DRB5,PSMB9,TAP2 | antigen processing and presentation of exogenous antigen:HLA-C,HLA-DOB,HLA-DQA1,HLA-DQA2,HLA-DQB1,HLA-DQB2,HLA-DRA,HLA-DRB1,HLA-DRB5,PSMB9,TAP2 | antigen processing and presentation of peptide antigen:HLA-C,HLA-DOB,HLA-DQA1,HLA-DQA2,HLA-DQB1,HLA…	OHP17_all	20.8187	0.0249708	0.0100144	0.0100144	3549	0.231338	0.0702299	3.00538	0	0.213173	0.0566258	3.77776	0.260461	0.23552	0.13174	1.13186	0.0235337	0.604975	0.0634566	20.8187	0.734417	0.471706	0.069813	10.8503	0	0.817345	0.12133	10.7925	0.679404	0.101665
6:32448614:T:A	6	32448614	6p21.32	A	T	0.993	FALSE	rs145827824:32103749:C:G	0.520094	HLA-DRB9 (7.3 kb); HLA-DRA (36 kb); HLA-DRB5 (37 kb); RNU1-61P (69 kb)		0.404 Bioavailable testosterone levels	- | ABHD16A | AGER | AIF1 | APOM | ATF6B | ATP6V1G2 | B3GALT4 | BAG6 | BRD2 | C4A | C4B | C4B_2 | C6orf10 | C6orf25 | C6orf48 | CFB | CLIC1 | CSNK2B | CYP21A2 | DDAH2 | DDR1 | DXO | FLOT1 | GPANK1 | GPSM3 | HCG23 | HCG27 | HCP5 | HLA-C | HLA-DMA | HLA-DOA | HLA-DOB | HLA-DPA1 | HLA-DPB1 | HLA-DQA1 | HLA-DQA2 | HLA-DQB1 | HLA-DQB1-AS1 | HLA-DQB2 | HLA-DRA | HLA-DRB1 | HLA-DRB4 | HLA-DRB5 | HLA-DRB…	ABP1 | ARHGAP24 | BTN3A2 | CLK3 | DEF8 | EEF1G | EXOC1 | FLOT1 | GOLGA2 | HLA-C | HLA-G | HLA-H | IER3 | KPNA2 | LIMS1 | LINC00243 | MDC1 | ME2 | NCR3 | RPL34 | SSRP1 | TINF2 | TMEM154 | unnamed | VARS2 | XRCC6 | ZNF672 | ZNRD1	Systemic lupus erythematosus:C4A,C4B,HLA-DOB,HLA-DQA1,HLA-DQA2,HLA-DQB1,HLA-DRA,HLA-DRB1,HLA-DRB5 | Antigen processing and presentation:HLA-C,HLA-DOB,HLA-DQA1,HLA-DQA2,HLA-DQB1,HLA-DRA,HLA-DRB1,HLA-DRB5,HSPA1A,HSPA1B,HSPA1L,TAP2 | Allograft rejection:HLA-C,HLA-DOB,HLA-DQA1,HLA-DQA2,HLA-DQB1,HLA-DRA,HLA-DRB1,HLA-DRB5 | Type I diabetes mellitus:HLA-C,HLA-DOB,HLA-DQA1,HLA-DQA2,HLA-DQB1,HLA-DRA,HLA-D…	Translocation of ZAP-70 to Immunological synapse:HLA-DQA1,HLA-DQA2,HLA-DQB1,HLA-DQB2,HLA-DRA,HLA-DRB1,HLA-DRB5 | Interferon gamma signaling:HLA-C,HLA-DQA1,HLA-DQA2,HLA-DQB1,HLA-DQB2,HLA-DRA,HLA-DRB1,HLA-DRB5 | Generation of second messenger molecules:HLA-DQA1,HLA-DQA2,HLA-DQB1,HLA-DQB2,HLA-DRA,HLA-DRB1,HLA-DRB5 | Phosphorylation of CD3 and TCR zeta chains:HLA-DQA1,HLA-DQA2,HLA-DQB1,HLA-DQB2,HLA-D…	Kawasaki disease:BTNL2,HLA-C,HLA-DRB1,PRRC2A | lymphadenitis:BTNL2,HLA-C,HLA-DRB1,PRRC2A | lymph node disease:BTNL2,HLA-C,HLA-DRB1,PRRC2A | leprosy:BTNL2,HLA-DQB1,HLA-DRB1 | Graves' disease:HLA-C,HLA-DQA1,HLA-DQB1,HLA-DRB1,TAP2 | sarcoidosis:AGER,BTNL2,HLA-DQA1,HLA-DQB1,HLA-DRB1,HSPA1L | hypersensitivity reaction type IV disease:AGER,BTNL2,HLA-DQA1,HLA-DQB1,HLA-DRB1,HSPA1L | hepatitis:HLA-C,HLA-D…	antigen processing and presentation of exogenous peptide antigen:HLA-C,HLA-DOB,HLA-DQA1,HLA-DQA2,HLA-DQB1,HLA-DQB2,HLA-DRA,HLA-DRB1,HLA-DRB5,PSMB9,TAP2 | antigen processing and presentation of exogenous antigen:HLA-C,HLA-DOB,HLA-DQA1,HLA-DQA2,HLA-DQB1,HLA-DQB2,HLA-DRA,HLA-DRB1,HLA-DRB5,PSMB9,TAP2 | antigen processing and presentation of peptide antigen:HLA-C,HLA-DOB,HLA-DQA1,HLA-DQA2,HLA-DQB1,HLA…	OHP17_all	20.8151	0.0249664	0.0100104	0.0100104	3549	0.231284	0.0702376	3.00362	0	0.212877	0.0566301	3.76817	0.266802	0.235694	0.131761	1.13284	0.0260277	0.604953	0.0634601	20.8151	0.734647	0.471546	0.0698183	10.8419	0	0.817479	0.121333	10.7953	0.679152	0.101798
rs114999659:32443357:C:T	6	32443357	6p21.32	T	C	0.993417	FALSE	rs145827824:32103749:C:G	0.520094	HLA-DRB9 (2.1 kb, near_gene/Upstream gene/MODIFIER); HLA-DRA (31 kb); HLA-DRB5 (42 kb); BTNL2 (68 kb)	1.276	0.404 Bioavailable testosterone levels	- | ABHD16A | AGER | AIF1 | APOM | ATF6B | ATP6V1G2 | B3GALT4 | BAG6 | BRD2 | C4A | C4B | C4B_2 | C6orf10 | C6orf25 | C6orf48 | CFB | CLIC1 | CSNK2B | CUTA | CYP21A2 | DDAH2 | DDR1 | DXO | FLOT1 | GPANK1 | GPSM3 | HCG23 | HCG27 | HCP5 | HLA-C | HLA-DMA | HLA-DOA | HLA-DOB | HLA-DPA1 | HLA-DPB1 | HLA-DQA1 | HLA-DQA2 | HLA-DQB1 | HLA-DQB1-AS1 | HLA-DQB2 | HLA-DRA | HLA-DRB1 | HLA-DRB4 | HLA-DRB5 | …	ABP1 | ARHGAP24 | BTN3A2 | CLK3 | DEF8 | EEF1G | EXOC1 | FLOT1 | GOLGA2 | HLA-C | HLA-G | HLA-H | IER3 | KPNA2 | LIMS1 | LINC00243 | MDC1 | ME2 | NCR3 | RPL34 | SSRP1 | TINF2 | TMEM154 | unnamed | VARS2 | XRCC6 | ZNF672 | ZNRD1	Systemic lupus erythematosus:C4A,C4B,HLA-DOB,HLA-DQA1,HLA-DQA2,HLA-DQB1,HLA-DRA,HLA-DRB1,HLA-DRB5 | Antigen processing and presentation:HLA-C,HLA-DOB,HLA-DQA1,HLA-DQA2,HLA-DQB1,HLA-DRA,HLA-DRB1,HLA-DRB5,HSPA1A,HSPA1B,HSPA1L,TAP2 | Allograft rejection:HLA-C,HLA-DOB,HLA-DQA1,HLA-DQA2,HLA-DQB1,HLA-DRA,HLA-DRB1,HLA-DRB5 | Type I diabetes mellitus:HLA-C,HLA-DOB,HLA-DQA1,HLA-DQA2,HLA-DQB1,HLA-DRA,HLA-D…	Translocation of ZAP-70 to Immunological synapse:HLA-DQA1,HLA-DQA2,HLA-DQB1,HLA-DQB2,HLA-DRA,HLA-DRB1,HLA-DRB5 | Interferon gamma signaling:HLA-C,HLA-DQA1,HLA-DQA2,HLA-DQB1,HLA-DQB2,HLA-DRA,HLA-DRB1,HLA-DRB5 | Generation of second messenger molecules:HLA-DQA1,HLA-DQA2,HLA-DQB1,HLA-DQB2,HLA-DRA,HLA-DRB1,HLA-DRB5 | Phosphorylation of CD3 and TCR zeta chains:HLA-DQA1,HLA-DQA2,HLA-DQB1,HLA-DQB2,HLA-D…	Kawasaki disease:BTNL2,HLA-C,HLA-DRB1,PRRC2A | lymphadenitis:BTNL2,HLA-C,HLA-DRB1,PRRC2A | lymph node disease:BTNL2,HLA-C,HLA-DRB1,PRRC2A | leprosy:BTNL2,HLA-DQB1,HLA-DRB1 | Graves' disease:HLA-C,HLA-DQA1,HLA-DQB1,HLA-DRB1,TAP2 | sarcoidosis:AGER,BTNL2,HLA-DQA1,HLA-DQB1,HLA-DRB1,HSPA1L | hypersensitivity reaction type IV disease:AGER,BTNL2,HLA-DQA1,HLA-DQB1,HLA-DRB1,HSPA1L | hepatitis:HLA-C,HLA-D…	antigen processing and presentation of exogenous peptide antigen:HLA-C,HLA-DOB,HLA-DQA1,HLA-DQA2,HLA-DQB1,HLA-DQB2,HLA-DRA,HLA-DRB1,HLA-DRB5,PSMB9,TAP2 | antigen processing and presentation of exogenous antigen:HLA-C,HLA-DOB,HLA-DQA1,HLA-DQA2,HLA-DQB1,HLA-DQB2,HLA-DRA,HLA-DRB1,HLA-DRB5,PSMB9,TAP2 | antigen processing and presentation of peptide antigen:HLA-C,HLA-DOB,HLA-DQA1,HLA-DQA2,HLA-DQB1,HLA…	OHP17_all	20.8149	0.0249662	0.0100111	0.0100111	3549	0.23124	0.0702327	3.00302	0	0.212935	0.0566298	3.76999	0.265713	0.235538	0.13174	1.13198	0.0238175	0.604942	0.0634592	20.8149	0.734636	0.471577	0.0698179	10.8433	0	0.8174	0.12133	10.7939	0.679239	0.101759
rs111511435:31381371:G:A	6	31381371	6p21.33	A	G	0.988504	FALSE	rs145827824:32103749:C:G	0.397591	HCP5 (0 kb, intron/Intron/MODIFIER | nc-RNA/Non coding transcript/MODIFIER); MICA (0 kb, intron/Intron/MODIFIER); LINC01149 (28 kb); HLA-S (31 kb); ZDHHC20P2 (33 kb); FGFR3P1 (36 kb); RNU6-283P (43 kb); DHFRP2 (47 kb)	2.04	0.606 Heel bone mineral density // 0.561 Bioavailable testosterone levels // 0.55 Neurological blood protein biomarker levels // 0.522 Aspartate aminotransferase levels in low alcohol consumption // 0.486 Blood protein levels	- | ABCF1 | ABHD16A | AGER | AIF1 | APOM | ATF6B | ATP6V1G2 | ATP6V1G2-DDX39B | BAG6 | C2 | C4A | C4B | C4B_2 | C6orf10 | C6orf48 | CCHCR1 | CLIC1 | CSNK2B | DDAH2 | DDR1 | DDX39B | DHX16 | DOM3Z | DXO | FLOT1 | GPANK1 | GPSM3 | GTF2H4 | HCG22 | HCG23 | HCG27 | HCG4B | HCG4P3 | HCP5 | HLA-A | HLA-B | HLA-C | HLA-DOB | HLA-DQA1 | HLA-DQA2 | HLA-DQB1 | HLA-DRA | HLA-DRB1 | HLA-DRB2 | HLA-DRB3 | HLA…	BTN3A2 | C6orf10 | CDC42EP4 | HLA-A | HLA-DQA1 | HLA-DQA2 | HLA-DRB1 | HLA-DRB4 | HLA-DRB5 | HLA-F | HLA-H | HLA-V | IER3 | NHP2 | PARP2 | TAP2 | TMEM154 | XRCC6 | ZNRD1	Systemic lupus erythematosus:HLA-DOB,HLA-DQA1,HLA-DRA,HLA-DRB1 | Antigen processing and presentation:HLA-C,HLA-DOB,HLA-DQA1,HLA-DRA,HLA-DRB1,HLA-E,HSPA1A,HSPA1B,HSPA1L,TAP2 | Allograft rejection:HLA-C,HLA-DOB,HLA-DQA1,HLA-DRA,HLA-DRB1,HLA-E | Type I diabetes mellitus:HLA-C,HLA-DOB,HLA-DQA1,HLA-DRA,HLA-DRB1,HLA-E,LTA | Graft-versus-host disease:HLA-C,HLA-DOB,HLA-DQA1,HLA-DRA,HLA-DRB1,HLA-E | Autoi…	Translocation of ZAP-70 to Immunological synapse:HLA-DQA1,HLA-DRA,HLA-DRB1 | Interferon gamma signaling:HLA-C,HLA-DQA1,HLA-DRA,HLA-DRB1,HLA-E | Generation of second messenger molecules:HLA-DQA1,HLA-DRA,HLA-DRB1 | Phosphorylation of CD3 and TCR zeta chains:HLA-DQA1,HLA-DRA,HLA-DRB1 | PD-1 signaling:HLA-DQA1,HLA-DRA,HLA-DRB1 | Interferon Signaling:HLA-C,HLA-DQA1,HLA-DRA,HLA-DRB1,HLA-E | RNA Polymer…	Kawasaki disease:BAG6,HLA-C,HLA-DRB1,HLA-E,PRRC2A | lymphadenitis:BAG6,HLA-C,HLA-DRB1,HLA-E,PRRC2A | lymph node disease:BAG6,HLA-C,HLA-DRB1,HLA-E,PRRC2A | leprosy:HLA-DRB1,LTA,MICA | Graves' disease:HLA-C,HLA-DQA1,HLA-DRB1,TAP2 | sarcoidosis:DDR1,HLA-DQA1,HLA-DRB1,HSPA1L,LTA | hypersensitivity reaction type IV disease:DDR1,HLA-DQA1,HLA-DRB1,HSPA1L,LTA | hepatitis:HLA-C,HLA-DQA1,HLA-DRB1,HLA-E,LTA…	antigen processing and presentation of exogenous peptide antigen:HLA-C,HLA-DOB,HLA-DQA1,HLA-DRA,HLA-DRB1,HLA-E,TAP2 | antigen processing and presentation of exogenous antigen:HLA-C,HLA-DOB,HLA-DQA1,HLA-DRA,HLA-DRB1,HLA-E,TAP2 | antigen processing and presentation of peptide antigen:HLA-C,HLA-DOB,HLA-DQA1,HLA-DRA,HLA-DRB1,HLA-E,TAP2 | adaptive immune response:HLA-C,HLA-DOB,HLA-DQA1,HLA-DRA,HLA-DRB…	OHP17_all	20.7925	0.0249389	0.0159864	0.0159864	3549	0.158366	0.0556779	2.35157	0	0.206075	0.0474738	4.84783	0	0.0807025	0.0986356	0.383788	0	0.491444	0.051582	20.7925	0	0.496283	0.0581005	16.8789	0	0.472931	0.0950629	6.18653	0.290014	0.0836912
rs79589473:31573382:G:A	6	31573382	6p21.33	A	G	0.979252	FALSE	rs145827824:32103749:C:G	0.641701	UQCRHP1 (5.5 kb); AIF1 (9.6 kb); NCR3 (13 kb); PRRC2A (15 kb); LST1 (17 kb); SNORA38 (17 kb); LTB (23 kb); TNF (27 kb); LTA (31 kb); BAG6 (33 kb); NFKBIL1 (47 kb); APOM (47 kb)	3.227	0.858 Bioavailable testosterone levels // 0.799 Aspartate aminotransferase levels in low alcohol consumption // 0.488 Neurological blood protein biomarker levels // 0.45 Heel bone mineral density // 0.373 Blood protein levels // 0.303 Ocular sarcoidosis	- | ABCF1 | ABHD16A | AGER | AIF1 | APOM | ATF6B | ATP6V1G2 | ATP6V1G2-DDX39B | BAG6 | BAT4 | BTNL2 | C2 | C4A | C4B | C4B_2 | C6orf10 | C6orf25 | C6orf48 | CCHCR1 | CFB | CLIC1 | CSNK2B | CUTA | DDAH2 | DDR1 | DDX39B | DHX16 | DOM3Z | DXO | EHMT2 | FLOT1 | GPANK1 | GPSM3 | GTF2H4 | HCG22 | HCG23 | HCG27 | HCG4B | HCG4P3 | HCP5 | HLA-A | HLA-B | HLA-C | HLA-DOA | HLA-DOB | HLA-DPA1 | HLA-DQA1 | H…	ABP1 | BTN3A2 | CCDC69 | EXOC1 | HLA-DRB1 | HLA-DRB4 | HLA-DRB5 | HLA-F | HLA-G | HLA-H | HLA-V | IER3 | LIMS1 | MDC1 | NHP2 | PARP2 | PSMB9 | SSRP1 | TAP2 | TMEM154 | TRAV12-1 | TUBB | ZAP70 | ZNF672 | ZNRD1	Systemic lupus erythematosus:HLA-DOB,HLA-DQA1,HLA-DRA,HLA-DRB1,TNF | Antigen processing and presentation:HLA-C,HLA-DOB,HLA-DQA1,HLA-DRA,HLA-DRB1,HLA-E,HSPA1A,HSPA1B,HSPA1L,TAP2,TNF | Allograft rejection:HLA-C,HLA-DOB,HLA-DQA1,HLA-DRA,HLA-DRB1,HLA-E,TNF | Type I diabetes mellitus:HLA-C,HLA-DOB,HLA-DQA1,HLA-DRA,HLA-DRB1,HLA-E,LTA,TNF | Graft-versus-host disease:HLA-C,HLA-DOB,HLA-DQA1,HLA-DRA,HLA-DR…	Translocation of ZAP-70 to Immunological synapse:HLA-DQA1,HLA-DRA,HLA-DRB1 | Interferon gamma signaling:HLA-C,HLA-DQA1,HLA-DRA,HLA-DRB1,HLA-E | Generation of second messenger molecules:HLA-DQA1,HLA-DRA,HLA-DRB1 | Phosphorylation of CD3 and TCR zeta chains:HLA-DQA1,HLA-DRA,HLA-DRB1 | PD-1 signaling:HLA-DQA1,HLA-DRA,HLA-DRB1 | Interferon Signaling:HLA-C,HLA-DQA1,HLA-DRA,HLA-DRB1,HLA-E,PSMB8 | RNA P…	Kawasaki disease:ABHD16A,BAG6,HLA-C,HLA-DRB1,HLA-E,PRRC2A,TNF | lymphadenitis:ABHD16A,BAG6,HLA-C,HLA-DRB1,HLA-E,PRRC2A,TNF | lymph node disease:ABHD16A,BAG6,HLA-C,HLA-DRB1,HLA-E,PRRC2A,TNF | leprosy:HLA-DRB1,LTA,TNF | Graves' disease:HLA-C,HLA-DQA1,HLA-DRB1,TAP2,TNF | sarcoidosis:DDR1,HLA-DQA1,HLA-DRB1,HSPA1L,LTA,TNF | hypersensitivity reaction type IV disease:DDR1,HLA-DQA1,HLA-DRB1,HSPA1L,LTA,TN…	antigen processing and presentation of exogenous peptide antigen:HLA-C,HLA-DOB,HLA-DQA1,HLA-DRA,HLA-DRB1,HLA-E,PSMB8,TAP2 | antigen processing and presentation of exogenous antigen:HLA-C,HLA-DOB,HLA-DQA1,HLA-DRA,HLA-DRB1,HLA-E,PSMB8,TAP2 | antigen processing and presentation of peptide antigen:HLA-C,HLA-DOB,HLA-DQA1,HLA-DRA,HLA-DRB1,HLA-E,PSMB8,TAP2 | adaptive immune response:HLA-C,HLA-DOB,HLA-DQ…	OHP17_all	20.7799	0.0249235	0.017422	0.017422	3549	0.140151	0.0551842	1.95488	0.471401	0.198146	0.0456969	4.83853	0	0.0877539	0.100786	0.41576	0.16206	0.472099	0.0495673	20.7799	0	0.477386	0.0560415	16.7913	0	0.455325	0.0905185	6.31132	0.485114	0.113004
rs200442243:31389066:C:CA	6	31389066	6p21.33	CA	C	0.987835	FALSE	rs145827824:32103749:C:G	0.422257	HCP5 (0 kb, intron/Intron/MODIFIER | nc-RNA/Non coding transcript/MODIFIER); MICA (6 kb); LINC01149 (20 kb); HLA-S (39 kb); ZDHHC20P2 (40 kb); FGFR3P1 (43 kb)	2.021	0.645 Heel bone mineral density // 0.595 Bioavailable testosterone levels // 0.585 Neurological blood protein biomarker levels // 0.554 Aspartate aminotransferase levels in low alcohol consumption // 0.517 Blood protein levels	- | ABCF1 | ABHD16A | AGER | AIF1 | APOM | ATF6B | ATP6V1G2 | ATP6V1G2-DDX39B | BAG6 | C2 | C4A | C4B | C4B_2 | C6orf10 | C6orf48 | CCHCR1 | CLIC1 | CSNK2B | DDAH2 | DDR1 | DDX39B | DHX16 | DOM3Z | DXO | EHMT2 | FLOT1 | GPANK1 | GPSM3 | GTF2H4 | HCG22 | HCG23 | HCG27 | HCG4B | HCG4P3 | HCP5 | HLA-A | HLA-B | HLA-C | HLA-DOB | HLA-DQA1 | HLA-DQA2 | HLA-DQB1 | HLA-DQB2 | HLA-DRA | HLA-DRB1 | HLA-DR…	BTN3A2 | C6orf10 | CDC42EP4 | HLA-A | HLA-DQA1 | HLA-DQA2 | HLA-DRB1 | HLA-DRB4 | HLA-DRB5 | HLA-F | HLA-H | HLA-V | IER3 | NHP2 | PARP2 | TAP2 | TMEM154 | XRCC6 | ZNRD1	Systemic lupus erythematosus:HLA-DOB,HLA-DQA1,HLA-DRA,HLA-DRB1 | Antigen processing and presentation:HLA-C,HLA-DOB,HLA-DQA1,HLA-DRA,HLA-DRB1,HLA-E,HSPA1A,HSPA1B,HSPA1L,TAP2 | Allograft rejection:HLA-C,HLA-DOB,HLA-DQA1,HLA-DRA,HLA-DRB1,HLA-E | Type I diabetes mellitus:HLA-C,HLA-DOB,HLA-DQA1,HLA-DRA,HLA-DRB1,HLA-E,LTA | Graft-versus-host disease:HLA-C,HLA-DOB,HLA-DQA1,HLA-DRA,HLA-DRB1,HLA-E | Autoi…	Translocation of ZAP-70 to Immunological synapse:HLA-DQA1,HLA-DRA,HLA-DRB1 | Interferon gamma signaling:HLA-C,HLA-DQA1,HLA-DRA,HLA-DRB1,HLA-E | Generation of second messenger molecules:HLA-DQA1,HLA-DRA,HLA-DRB1 | Phosphorylation of CD3 and TCR zeta chains:HLA-DQA1,HLA-DRA,HLA-DRB1 | PD-1 signaling:HLA-DQA1,HLA-DRA,HLA-DRB1 | Interferon Signaling:HLA-C,HLA-DQA1,HLA-DRA,HLA-DRB1,HLA-E | RNA Polymer…	Kawasaki disease:BAG6,HLA-C,HLA-DRB1,HLA-E,PRRC2A | lymphadenitis:BAG6,HLA-C,HLA-DRB1,HLA-E,PRRC2A | lymph node disease:BAG6,HLA-C,HLA-DRB1,HLA-E,PRRC2A | leprosy:HLA-DRB1,LTA,MICA | Graves' disease:HLA-C,HLA-DQA1,HLA-DRB1,TAP2 | sarcoidosis:DDR1,HLA-DQA1,HLA-DRB1,HSPA1L,LTA | hypersensitivity reaction type IV disease:DDR1,HLA-DQA1,HLA-DRB1,HSPA1L,LTA | hepatitis:HLA-C,HLA-DQA1,HLA-DRB1,HLA-E,LTA…	antigen processing and presentation of exogenous peptide antigen:HLA-C,HLA-DOB,HLA-DQA1,HLA-DRA,HLA-DRB1,HLA-E,TAP2 | antigen processing and presentation of exogenous antigen:HLA-C,HLA-DOB,HLA-DQA1,HLA-DRA,HLA-DRB1,HLA-E,TAP2 | antigen processing and presentation of peptide antigen:HLA-C,HLA-DOB,HLA-DQA1,HLA-DRA,HLA-DRB1,HLA-E,TAP2 | adaptive immune response:HLA-C,HLA-DOB,HLA-DQA1,HLA-DRA,HLA-DRB…	OHP17_all	20.7688	0.0249099	0.0159242	0.0159242	3549	0.155431	0.0557817	2.27332	0	0.202982	0.0474242	4.72865	0	0.077289	0.0991458	0.360855	0	0.491116	0.0515783	20.7688	0	0.493534	0.0580485	16.7301	0	0.47698	0.0951506	6.27202	0.370409	0.0848791
rs41560718:31324271:A:C	6	31324271	6p21.33	C	A	0.962165	FALSE	rs145827824:32103749:C:G	0.404229	HLA-B (0 kb, nc-exon/Non coding transcript exon/MODIFIER | intron/Intron/MODIFIER | nc-RNA/Non coding transcript/MODIFIER | near_gene/Upstream gene/MODIFIER); XXbac-BPG248L24.12 (0.15 kb, near_gene/Upstream gene/MODIFIER); DHFRP2 (9.9 kb); RNU6-283P (14 kb); FGFR3P1 (21 kb); ZDHHC20P2 (24 kb); HLA-S (26 kb); HCP5 (44 kb); MICA (47 kb)	7.503	0.608 Bioavailable testosterone levels // 0.607 Heel bone mineral density // 0.565 Aspartate aminotransferase levels in low alcohol consumption // 0.559 Neurological blood protein biomarker levels // 0.494 Blood protein levels // 0.303 Ocular sarcoidosis	- | ABCF1 | ABHD16A | AGER | AIF1 | APOM | ATF6B | ATP6V1G2 | ATP6V1G2-DDX39B | BAG6 | C2 | C4A | C4B | C4B_2 | C6orf10 | C6orf48 | CCHCR1 | CLIC1 | CSNK2B | DDAH2 | DDR1 | DDX39B | DXO | FLOT1 | GPANK1 | GPSM3 | GTF2H4 | HCG22 | HCG23 | HCG27 | HCG4B | HCG4P3 | HCP5 | HLA-A | HLA-B | HLA-C | HLA-DOB | HLA-DQA1 | HLA-DQA2 | HLA-DQB1 | HLA-DRA | HLA-DRB1 | HLA-DRB2 | HLA-DRB3 | HLA-DRB6 | HLA-DRB7…	BTN3A2 | C6orf10 | HLA-DQA1 | HLA-DRB1 | HLA-DRB4 | HLA-DRB5 | HLA-F | HLA-G | HLA-H | HLA-V | IER3 | NHP2 | PARP2 | TAP2 | TMEM154 | ZNRD1	Systemic lupus erythematosus:HLA-DOB,HLA-DQA1,HLA-DRA,HLA-DRB1 | Antigen processing and presentation:HLA-B,HLA-C,HLA-DOB,HLA-DQA1,HLA-DRA,HLA-DRB1,HLA-E,HSPA1A,HSPA1B,HSPA1L,TAP2 | Allograft rejection:HLA-B,HLA-C,HLA-DOB,HLA-DQA1,HLA-DRA,HLA-DRB1,HLA-E | Type I diabetes mellitus:HLA-B,HLA-C,HLA-DOB,HLA-DQA1,HLA-DRA,HLA-DRB1,HLA-E,LTA | Graft-versus-host disease:HLA-B,HLA-C,HLA-DOB,HLA-DQA1,HLA-DR…	Translocation of ZAP-70 to Immunological synapse:HLA-DQA1,HLA-DRA,HLA-DRB1 | Interferon gamma signaling:HLA-B,HLA-C,HLA-DQA1,HLA-DRA,HLA-DRB1,HLA-E | Generation of second messenger molecules:HLA-DQA1,HLA-DRA,HLA-DRB1 | Phosphorylation of CD3 and TCR zeta chains:HLA-DQA1,HLA-DRA,HLA-DRB1 | PD-1 signaling:HLA-DQA1,HLA-DRA,HLA-DRB1 | Interferon Signaling:HLA-B,HLA-C,HLA-DQA1,HLA-DRA,HLA-DRB1,HLA-E |…	Kawasaki disease:BAG6,HLA-B,HLA-C,HLA-DRB1,HLA-E,PRRC2A | lymphadenitis:BAG6,HLA-B,HLA-C,HLA-DRB1,HLA-E,PRRC2A | lymph node disease:BAG6,HLA-B,HLA-C,HLA-DRB1,HLA-E,PRRC2A | leprosy:HLA-DRB1,LTA,MICA | Graves' disease:HLA-B,HLA-C,HLA-DQA1,HLA-DRB1,TAP2 | sarcoidosis:DDR1,HLA-B,HLA-DQA1,HLA-DRB1,HSPA1L,LTA | hypersensitivity reaction type IV disease:DDR1,HLA-B,HLA-DQA1,HLA-DRB1,HSPA1L,LTA | hepatit…	antigen processing and presentation of exogenous peptide antigen:HLA-B,HLA-C,HLA-DOB,HLA-DQA1,HLA-DRA,HLA-DRB1,HLA-E,TAP2 | antigen processing and presentation of exogenous antigen:HLA-B,HLA-C,HLA-DOB,HLA-DQA1,HLA-DRA,HLA-DRB1,HLA-E,TAP2 | antigen processing and presentation of peptide antigen:HLA-B,HLA-C,HLA-DOB,HLA-DQA1,HLA-DRA,HLA-DRB1,HLA-E,TAP2 | adaptive immune response:HLA-B,HLA-C,HLA-DOB,…	OHP17_all	20.7632	0.0249031	0.0147762	0.0147762	3549	0.179537	0.0590103	2.62959	0	0.216764	0.0498974	4.85452	0	0.108959	0.105036	0.523496	0	0.516088	0.0542086	20.7632	0	0.517076	0.0610085	16.6305	0	0.502413	0.100077	6.28849	0.183657	0.0870743
rs73402206:31383960:A:G	6	31383960	6p21.33	G	A	0.999	FALSE	rs145827824:32103749:C:G	0.422257	HCP5 (0 kb, intron/Intron/MODIFIER | nc-RNA/Non coding transcript/MODIFIER); MICA (0.87 kb, near_gene/Downstream gene/MODIFIER); LINC01149 (25 kb); HLA-S (34 kb); ZDHHC20P2 (35 kb); FGFR3P1 (38 kb); RNU6-283P (46 kb); DHFRP2 (49 kb)	3.241	0.645 Heel bone mineral density // 0.595 Bioavailable testosterone levels // 0.585 Neurological blood protein biomarker levels // 0.554 Aspartate aminotransferase levels in low alcohol consumption // 0.517 Blood protein levels	- | ABCF1 | ABHD16A | AGER | AIF1 | APOM | ATF6B | ATP6V1G2 | ATP6V1G2-DDX39B | BAG6 | C2 | C4A | C4B | C4B_2 | C6orf10 | C6orf48 | CCHCR1 | CLIC1 | CSNK2B | DDAH2 | DDR1 | DDX39B | DHX16 | DOM3Z | DXO | EHMT2 | FLOT1 | GPANK1 | GPSM3 | GTF2H4 | HCG22 | HCG23 | HCG27 | HCG4B | HCG4P3 | HCP5 | HLA-A | HLA-B | HLA-C | HLA-DOB | HLA-DQA1 | HLA-DQA2 | HLA-DQB1 | HLA-DQB2 | HLA-DRA | HLA-DRB1 | HLA-DR…	BTN3A2 | C6orf10 | CDC42EP4 | HLA-A | HLA-DQA1 | HLA-DQA2 | HLA-DRB1 | HLA-DRB4 | HLA-DRB5 | HLA-F | HLA-H | HLA-V | IER3 | NHP2 | PARP2 | TAP2 | TMEM154 | XRCC6 | ZNRD1	Systemic lupus erythematosus:HLA-DOB,HLA-DQA1,HLA-DRA,HLA-DRB1 | Antigen processing and presentation:HLA-C,HLA-DOB,HLA-DQA1,HLA-DRA,HLA-DRB1,HLA-E,HSPA1A,HSPA1B,HSPA1L,TAP2 | Allograft rejection:HLA-C,HLA-DOB,HLA-DQA1,HLA-DRA,HLA-DRB1,HLA-E | Type I diabetes mellitus:HLA-C,HLA-DOB,HLA-DQA1,HLA-DRA,HLA-DRB1,HLA-E,LTA | Graft-versus-host disease:HLA-C,HLA-DOB,HLA-DQA1,HLA-DRA,HLA-DRB1,HLA-E | Autoi…	Translocation of ZAP-70 to Immunological synapse:HLA-DQA1,HLA-DRA,HLA-DRB1 | Interferon gamma signaling:HLA-C,HLA-DQA1,HLA-DRA,HLA-DRB1,HLA-E | Generation of second messenger molecules:HLA-DQA1,HLA-DRA,HLA-DRB1 | Phosphorylation of CD3 and TCR zeta chains:HLA-DQA1,HLA-DRA,HLA-DRB1 | PD-1 signaling:HLA-DQA1,HLA-DRA,HLA-DRB1 | Interferon Signaling:HLA-C,HLA-DQA1,HLA-DRA,HLA-DRB1,HLA-E | RNA Polymer…	Kawasaki disease:BAG6,HLA-C,HLA-DRB1,HLA-E,PRRC2A | lymphadenitis:BAG6,HLA-C,HLA-DRB1,HLA-E,PRRC2A | lymph node disease:BAG6,HLA-C,HLA-DRB1,HLA-E,PRRC2A | leprosy:HLA-DRB1,LTA,MICA | Graves' disease:HLA-C,HLA-DQA1,HLA-DRB1,TAP2 | sarcoidosis:DDR1,HLA-DQA1,HLA-DRB1,HSPA1L,LTA | hypersensitivity reaction type IV disease:DDR1,HLA-DQA1,HLA-DRB1,HSPA1L,LTA | hepatitis:HLA-C,HLA-DQA1,HLA-DRB1,HLA-E,LTA…	antigen processing and presentation of exogenous peptide antigen:HLA-C,HLA-DOB,HLA-DQA1,HLA-DRA,HLA-DRB1,HLA-E,TAP2 | antigen processing and presentation of exogenous antigen:HLA-C,HLA-DOB,HLA-DQA1,HLA-DRA,HLA-DRB1,HLA-E,TAP2 | antigen processing and presentation of peptide antigen:HLA-C,HLA-DOB,HLA-DQA1,HLA-DRA,HLA-DRB1,HLA-E,TAP2 | adaptive immune response:HLA-C,HLA-DOB,HLA-DQA1,HLA-DRA,HLA-DRB…	OHP17_all	20.751	0.0248882	0.0157788	0.0157788	3549	0.156691	0.0558447	2.29943	0	0.20532	0.0474874	4.81404	0	0.0776194	0.0991948	0.362586	0	0.491247	0.0516152	20.751	0	0.495399	0.0581162	16.8131	0	0.474463	0.0951553	6.21186	0.351488	0.084994
rs111288692:31382383:C:T	6	31382383	6p21.33	T	C	0.999	FALSE	rs145827824:32103749:C:G	0.422257	HCP5 (0 kb, intron/Intron/MODIFIER | nc-RNA/Non coding transcript/MODIFIER); MICA (0 kb, intron/Intron/MODIFIER); LINC01149 (27 kb); HLA-S (32 kb); ZDHHC20P2 (34 kb); FGFR3P1 (37 kb); RNU6-283P (44 kb); DHFRP2 (48 kb)	9.807	0.645 Heel bone mineral density // 0.595 Bioavailable testosterone levels // 0.585 Neurological blood protein biomarker levels // 0.554 Aspartate aminotransferase levels in low alcohol consumption // 0.517 Blood protein levels	- | ABCF1 | ABHD16A | AGER | AIF1 | APOM | ATF6B | ATP6V1G2 | ATP6V1G2-DDX39B | BAG6 | C2 | C4A | C4B | C4B_2 | C6orf10 | C6orf48 | CCHCR1 | CLIC1 | CSNK2B | DDAH2 | DDR1 | DDX39B | DHX16 | DOM3Z | DXO | EHMT2 | FLOT1 | GPANK1 | GPSM3 | GTF2H4 | HCG22 | HCG23 | HCG27 | HCG4B | HCG4P3 | HCP5 | HLA-A | HLA-B | HLA-C | HLA-DOB | HLA-DQA1 | HLA-DQA2 | HLA-DQB1 | HLA-DQB2 | HLA-DRA | HLA-DRB1 | HLA-DR…	BTN3A2 | C6orf10 | CDC42EP4 | HLA-A | HLA-DQA1 | HLA-DQA2 | HLA-DRB1 | HLA-DRB4 | HLA-DRB5 | HLA-F | HLA-H | HLA-V | IER3 | NHP2 | PARP2 | TAP2 | TMEM154 | XRCC6 | ZNRD1	Systemic lupus erythematosus:HLA-DOB,HLA-DQA1,HLA-DRA,HLA-DRB1 | Antigen processing and presentation:HLA-C,HLA-DOB,HLA-DQA1,HLA-DRA,HLA-DRB1,HLA-E,HSPA1A,HSPA1B,HSPA1L,TAP2 | Allograft rejection:HLA-C,HLA-DOB,HLA-DQA1,HLA-DRA,HLA-DRB1,HLA-E | Type I diabetes mellitus:HLA-C,HLA-DOB,HLA-DQA1,HLA-DRA,HLA-DRB1,HLA-E,LTA | Graft-versus-host disease:HLA-C,HLA-DOB,HLA-DQA1,HLA-DRA,HLA-DRB1,HLA-E | Autoi…	Translocation of ZAP-70 to Immunological synapse:HLA-DQA1,HLA-DRA,HLA-DRB1 | Interferon gamma signaling:HLA-C,HLA-DQA1,HLA-DRA,HLA-DRB1,HLA-E | Generation of second messenger molecules:HLA-DQA1,HLA-DRA,HLA-DRB1 | Phosphorylation of CD3 and TCR zeta chains:HLA-DQA1,HLA-DRA,HLA-DRB1 | PD-1 signaling:HLA-DQA1,HLA-DRA,HLA-DRB1 | Interferon Signaling:HLA-C,HLA-DQA1,HLA-DRA,HLA-DRB1,HLA-E | RNA Polymer…	Kawasaki disease:BAG6,HLA-C,HLA-DRB1,HLA-E,PRRC2A | lymphadenitis:BAG6,HLA-C,HLA-DRB1,HLA-E,PRRC2A | lymph node disease:BAG6,HLA-C,HLA-DRB1,HLA-E,PRRC2A | leprosy:HLA-DRB1,LTA,MICA | Graves' disease:HLA-C,HLA-DQA1,HLA-DRB1,TAP2 | sarcoidosis:DDR1,HLA-DQA1,HLA-DRB1,HSPA1L,LTA | hypersensitivity reaction type IV disease:DDR1,HLA-DQA1,HLA-DRB1,HSPA1L,LTA | hepatitis:HLA-C,HLA-DQA1,HLA-DRB1,HLA-E,LTA…	antigen processing and presentation of exogenous peptide antigen:HLA-C,HLA-DOB,HLA-DQA1,HLA-DRA,HLA-DRB1,HLA-E,TAP2 | antigen processing and presentation of exogenous antigen:HLA-C,HLA-DOB,HLA-DQA1,HLA-DRA,HLA-DRB1,HLA-E,TAP2 | antigen processing and presentation of peptide antigen:HLA-C,HLA-DOB,HLA-DQA1,HLA-DRA,HLA-DRB1,HLA-E,TAP2 | adaptive immune response:HLA-C,HLA-DOB,HLA-DQA1,HLA-DRA,HLA-DRB…	OHP17_all	20.7509	0.024888	0.0157791	0.0157791	3549	0.156682	0.0558435	2.29926	0	0.20532	0.0474874	4.81404	0	0.077609	0.0991911	0.362542	0	0.491238	0.0516144	20.7509	0	0.495399	0.0581162	16.8131	0	0.47444	0.0951523	6.21168	0.351241	0.0850042
rs111832266:31385963:G:A	6	31385963	6p21.33	A	G	0.999	FALSE	rs145827824:32103749:C:G	0.422257	HCP5 (0 kb, intron/Intron/MODIFIER | nc-RNA/Non coding transcript/MODIFIER); MICA (2.9 kb, near_gene/Downstream gene/MODIFIER); LINC01149 (23 kb); HLA-S (36 kb); ZDHHC20P2 (37 kb); FGFR3P1 (40 kb); RNU6-283P (48 kb)	0.644	0.645 Heel bone mineral density // 0.595 Bioavailable testosterone levels // 0.585 Neurological blood protein biomarker levels // 0.554 Aspartate aminotransferase levels in low alcohol consumption // 0.517 Blood protein levels	- | ABCF1 | ABHD16A | AGER | AIF1 | APOM | ATF6B | ATP6V1G2 | ATP6V1G2-DDX39B | BAG6 | C2 | C4A | C4B | C4B_2 | C6orf10 | C6orf48 | CCHCR1 | CLIC1 | CSNK2B | DDAH2 | DDR1 | DDX39B | DHX16 | DOM3Z | DXO | EHMT2 | FLOT1 | GPANK1 | GPSM3 | GTF2H4 | HCG22 | HCG23 | HCG27 | HCG4B | HCG4P3 | HCP5 | HLA-A | HLA-B | HLA-C | HLA-DOB | HLA-DQA1 | HLA-DQA2 | HLA-DQB1 | HLA-DQB2 | HLA-DRA | HLA-DRB1 | HLA-DR…	BTN3A2 | C6orf10 | CDC42EP4 | HLA-A | HLA-DQA1 | HLA-DQA2 | HLA-DRB1 | HLA-DRB4 | HLA-DRB5 | HLA-F | HLA-H | HLA-V | IER3 | NHP2 | PARP2 | TAP2 | TMEM154 | XRCC6 | ZNRD1	Systemic lupus erythematosus:HLA-DOB,HLA-DQA1,HLA-DRA,HLA-DRB1 | Antigen processing and presentation:HLA-C,HLA-DOB,HLA-DQA1,HLA-DRA,HLA-DRB1,HLA-E,HSPA1A,HSPA1B,HSPA1L,TAP2 | Allograft rejection:HLA-C,HLA-DOB,HLA-DQA1,HLA-DRA,HLA-DRB1,HLA-E | Type I diabetes mellitus:HLA-C,HLA-DOB,HLA-DQA1,HLA-DRA,HLA-DRB1,HLA-E,LTA | Graft-versus-host disease:HLA-C,HLA-DOB,HLA-DQA1,HLA-DRA,HLA-DRB1,HLA-E | Autoi…	Translocation of ZAP-70 to Immunological synapse:HLA-DQA1,HLA-DRA,HLA-DRB1 | Interferon gamma signaling:HLA-C,HLA-DQA1,HLA-DRA,HLA-DRB1,HLA-E | Generation of second messenger molecules:HLA-DQA1,HLA-DRA,HLA-DRB1 | Phosphorylation of CD3 and TCR zeta chains:HLA-DQA1,HLA-DRA,HLA-DRB1 | PD-1 signaling:HLA-DQA1,HLA-DRA,HLA-DRB1 | Interferon Signaling:HLA-C,HLA-DQA1,HLA-DRA,HLA-DRB1,HLA-E | RNA Polymer…	Kawasaki disease:BAG6,HLA-C,HLA-DRB1,HLA-E,PRRC2A | lymphadenitis:BAG6,HLA-C,HLA-DRB1,HLA-E,PRRC2A | lymph node disease:BAG6,HLA-C,HLA-DRB1,HLA-E,PRRC2A | leprosy:HLA-DRB1,LTA,MICA | Graves' disease:HLA-C,HLA-DQA1,HLA-DRB1,TAP2 | sarcoidosis:DDR1,HLA-DQA1,HLA-DRB1,HSPA1L,LTA | hypersensitivity reaction type IV disease:DDR1,HLA-DQA1,HLA-DRB1,HSPA1L,LTA | hepatitis:HLA-C,HLA-DQA1,HLA-DRB1,HLA-E,LTA…	antigen processing and presentation of exogenous peptide antigen:HLA-C,HLA-DOB,HLA-DQA1,HLA-DRA,HLA-DRB1,HLA-E,TAP2 | antigen processing and presentation of exogenous antigen:HLA-C,HLA-DOB,HLA-DQA1,HLA-DRA,HLA-DRB1,HLA-E,TAP2 | antigen processing and presentation of peptide antigen:HLA-C,HLA-DOB,HLA-DQA1,HLA-DRA,HLA-DRB1,HLA-E,TAP2 | adaptive immune response:HLA-C,HLA-DOB,HLA-DQA1,HLA-DRA,HLA-DRB…	OHP17_all	20.7509	0.024888	0.0157791	0.0157791	3549	0.156682	0.0558435	2.29926	0	0.20532	0.0474874	4.81404	0	0.077609	0.0991911	0.362542	0	0.491238	0.0516144	20.7509	0	0.495399	0.0581162	16.8131	0	0.47444	0.0951523	6.21168	0.351241	0.0850042
rs112083412:31381409:C:T	6	31381409	6p21.33	T	C	0.998417	FALSE	rs145827824:32103749:C:G	0.422257	HCP5 (0 kb, intron/Intron/MODIFIER | nc-RNA/Non coding transcript/MODIFIER); MICA (0 kb, intron/Intron/MODIFIER); LINC01149 (28 kb); HLA-S (31 kb); ZDHHC20P2 (33 kb); FGFR3P1 (36 kb); RNU6-283P (43 kb); DHFRP2 (47 kb)	2.448	0.645 Heel bone mineral density // 0.595 Bioavailable testosterone levels // 0.585 Neurological blood protein biomarker levels // 0.554 Aspartate aminotransferase levels in low alcohol consumption // 0.517 Blood protein levels	- | ABCF1 | ABHD16A | AGER | AIF1 | APOM | ATF6B | ATP6V1G2 | ATP6V1G2-DDX39B | BAG6 | C2 | C4A | C4B | C4B_2 | C6orf10 | C6orf48 | CCHCR1 | CLIC1 | CSNK2B | DDAH2 | DDR1 | DDX39B | DHX16 | DOM3Z | DXO | EHMT2 | FLOT1 | GPANK1 | GPSM3 | GTF2H4 | HCG22 | HCG23 | HCG27 | HCG4B | HCG4P3 | HCP5 | HLA-A | HLA-B | HLA-C | HLA-DOB | HLA-DQA1 | HLA-DQA2 | HLA-DQB1 | HLA-DQB2 | HLA-DRA | HLA-DRB1 | HLA-DR…	BTN3A2 | C6orf10 | CDC42EP4 | HLA-A | HLA-DQA1 | HLA-DQA2 | HLA-DRB1 | HLA-DRB4 | HLA-DRB5 | HLA-F | HLA-H | HLA-V | IER3 | NHP2 | PARP2 | TAP2 | TMEM154 | XRCC6 | ZNRD1	Systemic lupus erythematosus:HLA-DOB,HLA-DQA1,HLA-DRA,HLA-DRB1 | Antigen processing and presentation:HLA-C,HLA-DOB,HLA-DQA1,HLA-DRA,HLA-DRB1,HLA-E,HSPA1A,HSPA1B,HSPA1L,TAP2 | Allograft rejection:HLA-C,HLA-DOB,HLA-DQA1,HLA-DRA,HLA-DRB1,HLA-E | Type I diabetes mellitus:HLA-C,HLA-DOB,HLA-DQA1,HLA-DRA,HLA-DRB1,HLA-E,LTA | Graft-versus-host disease:HLA-C,HLA-DOB,HLA-DQA1,HLA-DRA,HLA-DRB1,HLA-E | Autoi…	Translocation of ZAP-70 to Immunological synapse:HLA-DQA1,HLA-DRA,HLA-DRB1 | Interferon gamma signaling:HLA-C,HLA-DQA1,HLA-DRA,HLA-DRB1,HLA-E | Generation of second messenger molecules:HLA-DQA1,HLA-DRA,HLA-DRB1 | Phosphorylation of CD3 and TCR zeta chains:HLA-DQA1,HLA-DRA,HLA-DRB1 | PD-1 signaling:HLA-DQA1,HLA-DRA,HLA-DRB1 | Interferon Signaling:HLA-C,HLA-DQA1,HLA-DRA,HLA-DRB1,HLA-E | RNA Polymer…	Kawasaki disease:BAG6,HLA-C,HLA-DRB1,HLA-E,PRRC2A | lymphadenitis:BAG6,HLA-C,HLA-DRB1,HLA-E,PRRC2A | lymph node disease:BAG6,HLA-C,HLA-DRB1,HLA-E,PRRC2A | leprosy:HLA-DRB1,LTA,MICA | Graves' disease:HLA-C,HLA-DQA1,HLA-DRB1,TAP2 | sarcoidosis:DDR1,HLA-DQA1,HLA-DRB1,HSPA1L,LTA | hypersensitivity reaction type IV disease:DDR1,HLA-DQA1,HLA-DRB1,HSPA1L,LTA | hepatitis:HLA-C,HLA-DQA1,HLA-DRB1,HLA-E,LTA…	antigen processing and presentation of exogenous peptide antigen:HLA-C,HLA-DOB,HLA-DQA1,HLA-DRA,HLA-DRB1,HLA-E,TAP2 | antigen processing and presentation of exogenous antigen:HLA-C,HLA-DOB,HLA-DQA1,HLA-DRA,HLA-DRB1,HLA-E,TAP2 | antigen processing and presentation of peptide antigen:HLA-C,HLA-DOB,HLA-DQA1,HLA-DRA,HLA-DRB1,HLA-E,TAP2 | adaptive immune response:HLA-C,HLA-DOB,HLA-DQA1,HLA-DRA,HLA-DRB…	OHP17_all	20.7509	0.024888	0.0157791	0.0157791	3549	0.156682	0.0558435	2.29926	0	0.20532	0.0474874	4.81404	0	0.077609	0.0991911	0.362542	0	0.491238	0.0516144	20.7509	0	0.495399	0.0581162	16.8131	0	0.47444	0.0951523	6.21168	0.351241	0.0850042
rs112111750:31389968:C:T	6	31389968	6p21.33	T	C	0.999	FALSE	rs145827824:32103749:C:G	0.422257	HCP5 (0 kb, intron/Intron/MODIFIER | nc-RNA/Non coding transcript/MODIFIER); MICA (6.9 kb); LINC01149 (19 kb); HLA-S (40 kb); ZDHHC20P2 (41 kb); FGFR3P1 (44 kb)	0.997	0.645 Heel bone mineral density // 0.595 Bioavailable testosterone levels // 0.585 Neurological blood protein biomarker levels // 0.554 Aspartate aminotransferase levels in low alcohol consumption // 0.517 Blood protein levels	- | ABCF1 | ABHD16A | AGER | AIF1 | APOM | ATF6B | ATP6V1G2 | ATP6V1G2-DDX39B | BAG6 | C2 | C4A | C4B | C4B_2 | C6orf10 | C6orf48 | CCHCR1 | CLIC1 | CSNK2B | DDAH2 | DDR1 | DDX39B | DHX16 | DOM3Z | DXO | EHMT2 | FLOT1 | GPANK1 | GPSM3 | GTF2H4 | HCG22 | HCG23 | HCG27 | HCG4B | HCG4P3 | HCP5 | HLA-A | HLA-B | HLA-C | HLA-DOB | HLA-DQA1 | HLA-DQA2 | HLA-DQB1 | HLA-DQB2 | HLA-DRA | HLA-DRB1 | HLA-DR…	BTN3A2 | C6orf10 | CDC42EP4 | HLA-A | HLA-DQA1 | HLA-DQA2 | HLA-DRB1 | HLA-DRB4 | HLA-DRB5 | HLA-F | HLA-H | HLA-V | IER3 | NHP2 | PARP2 | TAP2 | TMEM154 | XRCC6 | ZNRD1	Systemic lupus erythematosus:HLA-DOB,HLA-DQA1,HLA-DRA,HLA-DRB1 | Antigen processing and presentation:HLA-C,HLA-DOB,HLA-DQA1,HLA-DRA,HLA-DRB1,HLA-E,HSPA1A,HSPA1B,HSPA1L,TAP2 | Allograft rejection:HLA-C,HLA-DOB,HLA-DQA1,HLA-DRA,HLA-DRB1,HLA-E | Type I diabetes mellitus:HLA-C,HLA-DOB,HLA-DQA1,HLA-DRA,HLA-DRB1,HLA-E,LTA | Graft-versus-host disease:HLA-C,HLA-DOB,HLA-DQA1,HLA-DRA,HLA-DRB1,HLA-E | Autoi…	Translocation of ZAP-70 to Immunological synapse:HLA-DQA1,HLA-DRA,HLA-DRB1 | Interferon gamma signaling:HLA-C,HLA-DQA1,HLA-DRA,HLA-DRB1,HLA-E | Generation of second messenger molecules:HLA-DQA1,HLA-DRA,HLA-DRB1 | Phosphorylation of CD3 and TCR zeta chains:HLA-DQA1,HLA-DRA,HLA-DRB1 | PD-1 signaling:HLA-DQA1,HLA-DRA,HLA-DRB1 | Interferon Signaling:HLA-C,HLA-DQA1,HLA-DRA,HLA-DRB1,HLA-E | RNA Polymer…	Kawasaki disease:BAG6,HLA-C,HLA-DRB1,HLA-E,PRRC2A | lymphadenitis:BAG6,HLA-C,HLA-DRB1,HLA-E,PRRC2A | lymph node disease:BAG6,HLA-C,HLA-DRB1,HLA-E,PRRC2A | leprosy:HLA-DRB1,LTA,MICA | Graves' disease:HLA-C,HLA-DQA1,HLA-DRB1,TAP2 | sarcoidosis:DDR1,HLA-DQA1,HLA-DRB1,HSPA1L,LTA | hypersensitivity reaction type IV disease:DDR1,HLA-DQA1,HLA-DRB1,HSPA1L,LTA | hepatitis:HLA-C,HLA-DQA1,HLA-DRB1,HLA-E,LTA…	antigen processing and presentation of exogenous peptide antigen:HLA-C,HLA-DOB,HLA-DQA1,HLA-DRA,HLA-DRB1,HLA-E,TAP2 | antigen processing and presentation of exogenous antigen:HLA-C,HLA-DOB,HLA-DQA1,HLA-DRA,HLA-DRB1,HLA-E,TAP2 | antigen processing and presentation of peptide antigen:HLA-C,HLA-DOB,HLA-DQA1,HLA-DRA,HLA-DRB1,HLA-E,TAP2 | adaptive immune response:HLA-C,HLA-DOB,HLA-DQA1,HLA-DRA,HLA-DRB…	OHP17_all	20.7509	0.024888	0.0157791	0.0157791	3549	0.156682	0.0558435	2.29926	0	0.20532	0.0474874	4.81404	0	0.077609	0.0991911	0.362542	0	0.491238	0.0516144	20.7509	0	0.495399	0.0581162	16.8131	0	0.47444	0.0951523	6.21168	0.351241	0.0850042
rs112729487:31390610:G:A	6	31390610	6p21.33	A	G	0.999	FALSE	rs145827824:32103749:C:G	0.422257	HCP5 (0 kb, intron/Intron/MODIFIER | nc-RNA/Non coding transcript/MODIFIER); MICA (7.5 kb); LINC01149 (19 kb); HLA-S (41 kb); ZDHHC20P2 (42 kb); FGFR3P1 (45 kb)	1.572	0.645 Heel bone mineral density // 0.595 Bioavailable testosterone levels // 0.585 Neurological blood protein biomarker levels // 0.554 Aspartate aminotransferase levels in low alcohol consumption // 0.517 Blood protein levels	- | ABCF1 | ABHD16A | AGER | AIF1 | APOM | ATF6B | ATP6V1G2 | ATP6V1G2-DDX39B | BAG6 | C2 | C4A | C4B | C4B_2 | C6orf10 | C6orf48 | CCHCR1 | CLIC1 | CSNK2B | DDAH2 | DDR1 | DDX39B | DHX16 | DOM3Z | DXO | EHMT2 | FLOT1 | GPANK1 | GPSM3 | GTF2H4 | HCG22 | HCG23 | HCG27 | HCG4B | HCG4P3 | HCP5 | HLA-A | HLA-B | HLA-C | HLA-DOB | HLA-DQA1 | HLA-DQA2 | HLA-DQB1 | HLA-DQB2 | HLA-DRA | HLA-DRB1 | HLA-DR…	BTN3A2 | C6orf10 | CDC42EP4 | HLA-A | HLA-DQA1 | HLA-DQA2 | HLA-DRB1 | HLA-DRB4 | HLA-DRB5 | HLA-F | HLA-H | HLA-V | IER3 | NHP2 | PARP2 | TAP2 | TMEM154 | XRCC6 | ZNRD1	Systemic lupus erythematosus:HLA-DOB,HLA-DQA1,HLA-DRA,HLA-DRB1 | Antigen processing and presentation:HLA-C,HLA-DOB,HLA-DQA1,HLA-DRA,HLA-DRB1,HLA-E,HSPA1A,HSPA1B,HSPA1L,TAP2 | Allograft rejection:HLA-C,HLA-DOB,HLA-DQA1,HLA-DRA,HLA-DRB1,HLA-E | Type I diabetes mellitus:HLA-C,HLA-DOB,HLA-DQA1,HLA-DRA,HLA-DRB1,HLA-E,LTA | Graft-versus-host disease:HLA-C,HLA-DOB,HLA-DQA1,HLA-DRA,HLA-DRB1,HLA-E | Autoi…	Translocation of ZAP-70 to Immunological synapse:HLA-DQA1,HLA-DRA,HLA-DRB1 | Interferon gamma signaling:HLA-C,HLA-DQA1,HLA-DRA,HLA-DRB1,HLA-E | Generation of second messenger molecules:HLA-DQA1,HLA-DRA,HLA-DRB1 | Phosphorylation of CD3 and TCR zeta chains:HLA-DQA1,HLA-DRA,HLA-DRB1 | PD-1 signaling:HLA-DQA1,HLA-DRA,HLA-DRB1 | Interferon Signaling:HLA-C,HLA-DQA1,HLA-DRA,HLA-DRB1,HLA-E | RNA Polymer…	Kawasaki disease:BAG6,HLA-C,HLA-DRB1,HLA-E,PRRC2A | lymphadenitis:BAG6,HLA-C,HLA-DRB1,HLA-E,PRRC2A | lymph node disease:BAG6,HLA-C,HLA-DRB1,HLA-E,PRRC2A | leprosy:HLA-DRB1,LTA,MICA | Graves' disease:HLA-C,HLA-DQA1,HLA-DRB1,TAP2 | sarcoidosis:DDR1,HLA-DQA1,HLA-DRB1,HSPA1L,LTA | hypersensitivity reaction type IV disease:DDR1,HLA-DQA1,HLA-DRB1,HSPA1L,LTA | hepatitis:HLA-C,HLA-DQA1,HLA-DRB1,HLA-E,LTA…	antigen processing and presentation of exogenous peptide antigen:HLA-C,HLA-DOB,HLA-DQA1,HLA-DRA,HLA-DRB1,HLA-E,TAP2 | antigen processing and presentation of exogenous antigen:HLA-C,HLA-DOB,HLA-DQA1,HLA-DRA,HLA-DRB1,HLA-E,TAP2 | antigen processing and presentation of peptide antigen:HLA-C,HLA-DOB,HLA-DQA1,HLA-DRA,HLA-DRB1,HLA-E,TAP2 | adaptive immune response:HLA-C,HLA-DOB,HLA-DQA1,HLA-DRA,HLA-DRB…	OHP17_all	20.7509	0.024888	0.0157791	0.0157791	3549	0.156682	0.0558435	2.29926	0	0.20532	0.0474874	4.81404	0	0.077609	0.0991911	0.362542	0	0.491238	0.0516144	20.7509	0	0.495399	0.0581162	16.8131	0	0.47444	0.0951523	6.21168	0.351241	0.0850042
rs113901367:31382015:A:T	6	31382015	6p21.33	T	A	0.999	FALSE	rs145827824:32103749:C:G	0.422257	HCP5 (0 kb, intron/Intron/MODIFIER | nc-RNA/Non coding transcript/MODIFIER); MICA (0 kb, intron/Intron/MODIFIER); LINC01149 (27 kb); HLA-S (32 kb); ZDHHC20P2 (33 kb); FGFR3P1 (36 kb); RNU6-283P (44 kb); DHFRP2 (47 kb)	6.808	0.645 Heel bone mineral density // 0.595 Bioavailable testosterone levels // 0.585 Neurological blood protein biomarker levels // 0.554 Aspartate aminotransferase levels in low alcohol consumption // 0.517 Blood protein levels	- | ABCF1 | ABHD16A | AGER | AIF1 | APOM | ATF6B | ATP6V1G2 | ATP6V1G2-DDX39B | BAG6 | C2 | C4A | C4B | C4B_2 | C6orf10 | C6orf48 | CCHCR1 | CLIC1 | CSNK2B | DDAH2 | DDR1 | DDX39B | DHX16 | DOM3Z | DXO | EHMT2 | FLOT1 | GPANK1 | GPSM3 | GTF2H4 | HCG22 | HCG23 | HCG27 | HCG4B | HCG4P3 | HCP5 | HLA-A | HLA-B | HLA-C | HLA-DOB | HLA-DQA1 | HLA-DQA2 | HLA-DQB1 | HLA-DQB2 | HLA-DRA | HLA-DRB1 | HLA-DR…	BTN3A2 | C6orf10 | CDC42EP4 | HLA-A | HLA-DQA1 | HLA-DQA2 | HLA-DRB1 | HLA-DRB4 | HLA-DRB5 | HLA-F | HLA-H | HLA-V | IER3 | NHP2 | PARP2 | TAP2 | TMEM154 | XRCC6 | ZNRD1	Systemic lupus erythematosus:HLA-DOB,HLA-DQA1,HLA-DRA,HLA-DRB1 | Antigen processing and presentation:HLA-C,HLA-DOB,HLA-DQA1,HLA-DRA,HLA-DRB1,HLA-E,HSPA1A,HSPA1B,HSPA1L,TAP2 | Allograft rejection:HLA-C,HLA-DOB,HLA-DQA1,HLA-DRA,HLA-DRB1,HLA-E | Type I diabetes mellitus:HLA-C,HLA-DOB,HLA-DQA1,HLA-DRA,HLA-DRB1,HLA-E,LTA | Graft-versus-host disease:HLA-C,HLA-DOB,HLA-DQA1,HLA-DRA,HLA-DRB1,HLA-E | Autoi…	Translocation of ZAP-70 to Immunological synapse:HLA-DQA1,HLA-DRA,HLA-DRB1 | Interferon gamma signaling:HLA-C,HLA-DQA1,HLA-DRA,HLA-DRB1,HLA-E | Generation of second messenger molecules:HLA-DQA1,HLA-DRA,HLA-DRB1 | Phosphorylation of CD3 and TCR zeta chains:HLA-DQA1,HLA-DRA,HLA-DRB1 | PD-1 signaling:HLA-DQA1,HLA-DRA,HLA-DRB1 | Interferon Signaling:HLA-C,HLA-DQA1,HLA-DRA,HLA-DRB1,HLA-E | RNA Polymer…	Kawasaki disease:BAG6,HLA-C,HLA-DRB1,HLA-E,PRRC2A | lymphadenitis:BAG6,HLA-C,HLA-DRB1,HLA-E,PRRC2A | lymph node disease:BAG6,HLA-C,HLA-DRB1,HLA-E,PRRC2A | leprosy:HLA-DRB1,LTA,MICA | Graves' disease:HLA-C,HLA-DQA1,HLA-DRB1,TAP2 | sarcoidosis:DDR1,HLA-DQA1,HLA-DRB1,HSPA1L,LTA | hypersensitivity reaction type IV disease:DDR1,HLA-DQA1,HLA-DRB1,HSPA1L,LTA | hepatitis:HLA-C,HLA-DQA1,HLA-DRB1,HLA-E,LTA…	antigen processing and presentation of exogenous peptide antigen:HLA-C,HLA-DOB,HLA-DQA1,HLA-DRA,HLA-DRB1,HLA-E,TAP2 | antigen processing and presentation of exogenous antigen:HLA-C,HLA-DOB,HLA-DQA1,HLA-DRA,HLA-DRB1,HLA-E,TAP2 | antigen processing and presentation of peptide antigen:HLA-C,HLA-DOB,HLA-DQA1,HLA-DRA,HLA-DRB1,HLA-E,TAP2 | adaptive immune response:HLA-C,HLA-DOB,HLA-DQA1,HLA-DRA,HLA-DRB…	OHP17_all	20.7509	0.024888	0.0157791	0.0157791	3549	0.156682	0.0558435	2.29926	0	0.20532	0.0474874	4.81404	0	0.077609	0.0991911	0.362542	0	0.491238	0.0516144	20.7509	0	0.495399	0.0581162	16.8131	0	0.47444	0.0951523	6.21168	0.351241	0.0850042
rs114107975:31382689:C:T	6	31382689	6p21.33	T	C	0.999	FALSE	rs145827824:32103749:C:G	0.422257	HCP5 (0 kb, intron/Intron/MODIFIER | nc-RNA/Non coding transcript/MODIFIER); MICA (0 kb, intron/Intron/MODIFIER); LINC01149 (27 kb); HLA-S (33 kb); ZDHHC20P2 (34 kb); FGFR3P1 (37 kb); RNU6-283P (45 kb); DHFRP2 (48 kb)	5.401	0.645 Heel bone mineral density // 0.595 Bioavailable testosterone levels // 0.585 Neurological blood protein biomarker levels // 0.554 Aspartate aminotransferase levels in low alcohol consumption // 0.517 Blood protein levels	- | ABCF1 | ABHD16A | AGER | AIF1 | APOM | ATF6B | ATP6V1G2 | ATP6V1G2-DDX39B | BAG6 | C2 | C4A | C4B | C4B_2 | C6orf10 | C6orf48 | CCHCR1 | CLIC1 | CSNK2B | DDAH2 | DDR1 | DDX39B | DHX16 | DXO | FLOT1 | GPANK1 | GPSM3 | GTF2H4 | HCG22 | HCG23 | HCG27 | HCG4B | HCG4P3 | HCP5 | HLA-A | HLA-B | HLA-C | HLA-DOB | HLA-DQA1 | HLA-DQA2 | HLA-DQB1 | HLA-DRA | HLA-DRB1 | HLA-DRB2 | HLA-DRB3 | HLA-DRB6 | …	BTN3A2 | C6orf10 | HLA-DQA1 | HLA-DRB1 | HLA-DRB4 | HLA-DRB5 | HLA-F | HLA-H | HLA-V | IER3 | NHP2 | PARP2 | TAP2 | TMEM154 | ZNRD1	Systemic lupus erythematosus:HLA-DOB,HLA-DQA1,HLA-DRA,HLA-DRB1 | Antigen processing and presentation:HLA-C,HLA-DOB,HLA-DQA1,HLA-DRA,HLA-DRB1,HLA-E,HSPA1A,HSPA1B,HSPA1L,TAP2 | Allograft rejection:HLA-C,HLA-DOB,HLA-DQA1,HLA-DRA,HLA-DRB1,HLA-E | Type I diabetes mellitus:HLA-C,HLA-DOB,HLA-DQA1,HLA-DRA,HLA-DRB1,HLA-E,LTA | Graft-versus-host disease:HLA-C,HLA-DOB,HLA-DQA1,HLA-DRA,HLA-DRB1,HLA-E | Autoi…	Translocation of ZAP-70 to Immunological synapse:HLA-DQA1,HLA-DRA,HLA-DRB1 | Interferon gamma signaling:HLA-C,HLA-DQA1,HLA-DRA,HLA-DRB1,HLA-E | Generation of second messenger molecules:HLA-DQA1,HLA-DRA,HLA-DRB1 | Phosphorylation of CD3 and TCR zeta chains:HLA-DQA1,HLA-DRA,HLA-DRB1 | PD-1 signaling:HLA-DQA1,HLA-DRA,HLA-DRB1 | Interferon Signaling:HLA-C,HLA-DQA1,HLA-DRA,HLA-DRB1,HLA-E | RNA Polymer…	Kawasaki disease:BAG6,HLA-C,HLA-DRB1,HLA-E,PRRC2A | lymphadenitis:BAG6,HLA-C,HLA-DRB1,HLA-E,PRRC2A | lymph node disease:BAG6,HLA-C,HLA-DRB1,HLA-E,PRRC2A | leprosy:HLA-DRB1,LTA,MICA | Graves' disease:HLA-C,HLA-DQA1,HLA-DRB1,TAP2 | sarcoidosis:DDR1,HLA-DQA1,HLA-DRB1,HSPA1L,LTA | hypersensitivity reaction type IV disease:DDR1,HLA-DQA1,HLA-DRB1,HSPA1L,LTA | hepatitis:HLA-C,HLA-DQA1,HLA-DRB1,HLA-E,LTA…	antigen processing and presentation of exogenous peptide antigen:HLA-C,HLA-DOB,HLA-DQA1,HLA-DRA,HLA-DRB1,HLA-E,TAP2 | antigen processing and presentation of exogenous antigen:HLA-C,HLA-DOB,HLA-DQA1,HLA-DRA,HLA-DRB1,HLA-E,TAP2 | antigen processing and presentation of peptide antigen:HLA-C,HLA-DOB,HLA-DQA1,HLA-DRA,HLA-DRB1,HLA-E,TAP2 | adaptive immune response:HLA-C,HLA-DOB,HLA-DQA1,HLA-DRA,HLA-DRB…	OHP17_all	20.7509	0.024888	0.0157791	0.0157791	3549	0.156682	0.0558435	2.29926	0	0.20532	0.0474874	4.81404	0	0.077609	0.0991911	0.362542	0	0.491238	0.0516144	20.7509	0	0.495399	0.0581162	16.8131	0	0.47444	0.0951523	6.21168	0.351241	0.0850042
rs116381822:31380019:C:G	6	31380019	6p21.33	G	C	0.997835	FALSE	rs145827824:32103749:C:G	0.422257	HCP5 (0 kb, intron/Intron/MODIFIER | nc-RNA/Non coding transcript/MODIFIER); MICA (0 kb, intron/Intron/MODIFIER); LINC01149 (29 kb); HLA-S (30 kb); ZDHHC20P2 (31 kb); FGFR3P1 (34 kb); RNU6-283P (42 kb); DHFRP2 (45 kb)	3.534	0.645 Heel bone mineral density // 0.595 Bioavailable testosterone levels // 0.585 Neurological blood protein biomarker levels // 0.554 Aspartate aminotransferase levels in low alcohol consumption // 0.517 Blood protein levels	- | ABCF1 | ABHD16A | AGER | AIF1 | APOM | ATF6B | ATP6V1G2 | ATP6V1G2-DDX39B | BAG6 | C2 | C4A | C4B | C4B_2 | C6orf10 | C6orf48 | CCHCR1 | CLIC1 | CSNK2B | DDAH2 | DDR1 | DDX39B | DHX16 | DOM3Z | DXO | EHMT2 | FLOT1 | GPANK1 | GPSM3 | GTF2H4 | HCG22 | HCG23 | HCG27 | HCG4B | HCG4P3 | HCP5 | HLA-A | HLA-B | HLA-C | HLA-DOB | HLA-DQA1 | HLA-DQA2 | HLA-DQB1 | HLA-DQB2 | HLA-DRA | HLA-DRB1 | HLA-DR…	BTN3A2 | C6orf10 | CDC42EP4 | HLA-A | HLA-DQA1 | HLA-DQA2 | HLA-DRB1 | HLA-DRB4 | HLA-DRB5 | HLA-F | HLA-H | HLA-V | IER3 | NHP2 | PARP2 | TAP2 | TMEM154 | XRCC6 | ZNRD1	Systemic lupus erythematosus:HLA-DOB,HLA-DQA1,HLA-DRA,HLA-DRB1 | Antigen processing and presentation:HLA-C,HLA-DOB,HLA-DQA1,HLA-DRA,HLA-DRB1,HLA-E,HSPA1A,HSPA1B,HSPA1L,TAP2 | Allograft rejection:HLA-C,HLA-DOB,HLA-DQA1,HLA-DRA,HLA-DRB1,HLA-E | Type I diabetes mellitus:HLA-C,HLA-DOB,HLA-DQA1,HLA-DRA,HLA-DRB1,HLA-E,LTA | Graft-versus-host disease:HLA-C,HLA-DOB,HLA-DQA1,HLA-DRA,HLA-DRB1,HLA-E | Autoi…	Translocation of ZAP-70 to Immunological synapse:HLA-DQA1,HLA-DRA,HLA-DRB1 | Interferon gamma signaling:HLA-C,HLA-DQA1,HLA-DRA,HLA-DRB1,HLA-E | Generation of second messenger molecules:HLA-DQA1,HLA-DRA,HLA-DRB1 | Phosphorylation of CD3 and TCR zeta chains:HLA-DQA1,HLA-DRA,HLA-DRB1 | PD-1 signaling:HLA-DQA1,HLA-DRA,HLA-DRB1 | Interferon Signaling:HLA-C,HLA-DQA1,HLA-DRA,HLA-DRB1,HLA-E | RNA Polymer…	Kawasaki disease:BAG6,HLA-C,HLA-DRB1,HLA-E,PRRC2A | lymphadenitis:BAG6,HLA-C,HLA-DRB1,HLA-E,PRRC2A | lymph node disease:BAG6,HLA-C,HLA-DRB1,HLA-E,PRRC2A | leprosy:HLA-DRB1,LTA,MICA | Graves' disease:HLA-C,HLA-DQA1,HLA-DRB1,TAP2 | sarcoidosis:DDR1,HLA-DQA1,HLA-DRB1,HSPA1L,LTA | hypersensitivity reaction type IV disease:DDR1,HLA-DQA1,HLA-DRB1,HSPA1L,LTA | hepatitis:HLA-C,HLA-DQA1,HLA-DRB1,HLA-E,LTA…	antigen processing and presentation of exogenous peptide antigen:HLA-C,HLA-DOB,HLA-DQA1,HLA-DRA,HLA-DRB1,HLA-E,TAP2 | antigen processing and presentation of exogenous antigen:HLA-C,HLA-DOB,HLA-DQA1,HLA-DRA,HLA-DRB1,HLA-E,TAP2 | antigen processing and presentation of peptide antigen:HLA-C,HLA-DOB,HLA-DQA1,HLA-DRA,HLA-DRB1,HLA-E,TAP2 | adaptive immune response:HLA-C,HLA-DOB,HLA-DQA1,HLA-DRA,HLA-DRB…	OHP17_all	20.7509	0.024888	0.0157791	0.0157791	3549	0.156682	0.0558435	2.29926	0	0.20532	0.0474874	4.81404	0	0.077609	0.0991911	0.362542	0	0.491238	0.0516144	20.7509	0	0.495399	0.0581162	16.8131	0	0.47444	0.0951523	6.21168	0.351241	0.0850042
rs116464382:31382406:C:T	6	31382406	6p21.33	T	C	0.999	FALSE	rs145827824:32103749:C:G	0.422257	HCP5 (0 kb, intron/Intron/MODIFIER | nc-RNA/Non coding transcript/MODIFIER); MICA (0 kb, intron/Intron/MODIFIER); LINC01149 (27 kb); HLA-S (32 kb); ZDHHC20P2 (34 kb); FGFR3P1 (37 kb); RNU6-283P (44 kb); DHFRP2 (48 kb)	9.144	0.645 Heel bone mineral density // 0.595 Bioavailable testosterone levels // 0.585 Neurological blood protein biomarker levels // 0.554 Aspartate aminotransferase levels in low alcohol consumption // 0.517 Blood protein levels	- | ABCF1 | ABHD16A | AGER | AIF1 | APOM | ATF6B | ATP6V1G2 | ATP6V1G2-DDX39B | BAG6 | C2 | C4A | C4B | C4B_2 | C6orf10 | C6orf48 | CCHCR1 | CLIC1 | CSNK2B | DDAH2 | DDR1 | DDX39B | DHX16 | DOM3Z | DXO | EHMT2 | FLOT1 | GPANK1 | GPSM3 | GTF2H4 | HCG22 | HCG23 | HCG27 | HCG4B | HCG4P3 | HCP5 | HLA-A | HLA-B | HLA-C | HLA-DOB | HLA-DQA1 | HLA-DQA2 | HLA-DQB1 | HLA-DQB2 | HLA-DRA | HLA-DRB1 | HLA-DR…	BTN3A2 | C6orf10 | CDC42EP4 | HLA-A | HLA-DQA1 | HLA-DQA2 | HLA-DRB1 | HLA-DRB4 | HLA-DRB5 | HLA-F | HLA-H | HLA-V | IER3 | NHP2 | PARP2 | TAP2 | TMEM154 | XRCC6 | ZNRD1	Systemic lupus erythematosus:HLA-DOB,HLA-DQA1,HLA-DRA,HLA-DRB1 | Antigen processing and presentation:HLA-C,HLA-DOB,HLA-DQA1,HLA-DRA,HLA-DRB1,HLA-E,HSPA1A,HSPA1B,HSPA1L,TAP2 | Allograft rejection:HLA-C,HLA-DOB,HLA-DQA1,HLA-DRA,HLA-DRB1,HLA-E | Type I diabetes mellitus:HLA-C,HLA-DOB,HLA-DQA1,HLA-DRA,HLA-DRB1,HLA-E,LTA | Graft-versus-host disease:HLA-C,HLA-DOB,HLA-DQA1,HLA-DRA,HLA-DRB1,HLA-E | Autoi…	Translocation of ZAP-70 to Immunological synapse:HLA-DQA1,HLA-DRA,HLA-DRB1 | Interferon gamma signaling:HLA-C,HLA-DQA1,HLA-DRA,HLA-DRB1,HLA-E | Generation of second messenger molecules:HLA-DQA1,HLA-DRA,HLA-DRB1 | Phosphorylation of CD3 and TCR zeta chains:HLA-DQA1,HLA-DRA,HLA-DRB1 | PD-1 signaling:HLA-DQA1,HLA-DRA,HLA-DRB1 | Interferon Signaling:HLA-C,HLA-DQA1,HLA-DRA,HLA-DRB1,HLA-E | RNA Polymer…	Kawasaki disease:BAG6,HLA-C,HLA-DRB1,HLA-E,PRRC2A | lymphadenitis:BAG6,HLA-C,HLA-DRB1,HLA-E,PRRC2A | lymph node disease:BAG6,HLA-C,HLA-DRB1,HLA-E,PRRC2A | leprosy:HLA-DRB1,LTA,MICA | Graves' disease:HLA-C,HLA-DQA1,HLA-DRB1,TAP2 | sarcoidosis:DDR1,HLA-DQA1,HLA-DRB1,HSPA1L,LTA | hypersensitivity reaction type IV disease:DDR1,HLA-DQA1,HLA-DRB1,HSPA1L,LTA | hepatitis:HLA-C,HLA-DQA1,HLA-DRB1,HLA-E,LTA…	antigen processing and presentation of exogenous peptide antigen:HLA-C,HLA-DOB,HLA-DQA1,HLA-DRA,HLA-DRB1,HLA-E,TAP2 | antigen processing and presentation of exogenous antigen:HLA-C,HLA-DOB,HLA-DQA1,HLA-DRA,HLA-DRB1,HLA-E,TAP2 | antigen processing and presentation of peptide antigen:HLA-C,HLA-DOB,HLA-DQA1,HLA-DRA,HLA-DRB1,HLA-E,TAP2 | adaptive immune response:HLA-C,HLA-DOB,HLA-DQA1,HLA-DRA,HLA-DRB…	OHP17_all	20.7509	0.024888	0.0157791	0.0157791	3549	0.156682	0.0558435	2.29926	0	0.20532	0.0474874	4.81404	0	0.077609	0.0991911	0.362542	0	0.491238	0.0516144	20.7509	0	0.495399	0.0581162	16.8131	0	0.47444	0.0951523	6.21168	0.351241	0.0850042
rs148892062:31386887:A:AT	6	31386887	6p21.33	AT	A	0.999	FALSE	rs145827824:32103749:C:G	0.422257	HCP5 (0 kb, intron/Intron/MODIFIER | nc-RNA/Non coding transcript/MODIFIER); MICA (3.8 kb, near_gene/Downstream gene/MODIFIER); LINC01149 (23 kb); HLA-S (37 kb); ZDHHC20P2 (38 kb); FGFR3P1 (41 kb); RNU6-283P (49 kb)	0.093	0.645 Heel bone mineral density // 0.595 Bioavailable testosterone levels // 0.585 Neurological blood protein biomarker levels // 0.554 Aspartate aminotransferase levels in low alcohol consumption // 0.517 Blood protein levels	- | ABCF1 | ABHD16A | AGER | AIF1 | APOM | ATF6B | ATP6V1G2 | ATP6V1G2-DDX39B | BAG6 | C2 | C4A | C4B | C4B_2 | C6orf10 | C6orf48 | CCHCR1 | CLIC1 | CSNK2B | DDAH2 | DDR1 | DDX39B | DHX16 | DOM3Z | DXO | EHMT2 | FLOT1 | GPANK1 | GPSM3 | GTF2H4 | HCG22 | HCG23 | HCG27 | HCG4B | HCG4P3 | HCP5 | HLA-A | HLA-B | HLA-C | HLA-DOB | HLA-DQA1 | HLA-DQA2 | HLA-DQB1 | HLA-DQB2 | HLA-DRA | HLA-DRB1 | HLA-DR…	BTN3A2 | C6orf10 | CDC42EP4 | HLA-A | HLA-DQA1 | HLA-DQA2 | HLA-DRB1 | HLA-DRB4 | HLA-DRB5 | HLA-F | HLA-H | HLA-V | IER3 | NHP2 | PARP2 | TAP2 | TMEM154 | XRCC6 | ZNRD1	Systemic lupus erythematosus:HLA-DOB,HLA-DQA1,HLA-DRA,HLA-DRB1 | Antigen processing and presentation:HLA-C,HLA-DOB,HLA-DQA1,HLA-DRA,HLA-DRB1,HLA-E,HSPA1A,HSPA1B,HSPA1L,TAP2 | Allograft rejection:HLA-C,HLA-DOB,HLA-DQA1,HLA-DRA,HLA-DRB1,HLA-E | Type I diabetes mellitus:HLA-C,HLA-DOB,HLA-DQA1,HLA-DRA,HLA-DRB1,HLA-E,LTA | Graft-versus-host disease:HLA-C,HLA-DOB,HLA-DQA1,HLA-DRA,HLA-DRB1,HLA-E | Autoi…	Translocation of ZAP-70 to Immunological synapse:HLA-DQA1,HLA-DRA,HLA-DRB1 | Interferon gamma signaling:HLA-C,HLA-DQA1,HLA-DRA,HLA-DRB1,HLA-E | Generation of second messenger molecules:HLA-DQA1,HLA-DRA,HLA-DRB1 | Phosphorylation of CD3 and TCR zeta chains:HLA-DQA1,HLA-DRA,HLA-DRB1 | PD-1 signaling:HLA-DQA1,HLA-DRA,HLA-DRB1 | Interferon Signaling:HLA-C,HLA-DQA1,HLA-DRA,HLA-DRB1,HLA-E | RNA Polymer…	Kawasaki disease:BAG6,HLA-C,HLA-DRB1,HLA-E,PRRC2A | lymphadenitis:BAG6,HLA-C,HLA-DRB1,HLA-E,PRRC2A | lymph node disease:BAG6,HLA-C,HLA-DRB1,HLA-E,PRRC2A | leprosy:HLA-DRB1,LTA,MICA | Graves' disease:HLA-C,HLA-DQA1,HLA-DRB1,TAP2 | sarcoidosis:DDR1,HLA-DQA1,HLA-DRB1,HSPA1L,LTA | hypersensitivity reaction type IV disease:DDR1,HLA-DQA1,HLA-DRB1,HSPA1L,LTA | hepatitis:HLA-C,HLA-DQA1,HLA-DRB1,HLA-E,LTA…	antigen processing and presentation of exogenous peptide antigen:HLA-C,HLA-DOB,HLA-DQA1,HLA-DRA,HLA-DRB1,HLA-E,TAP2 | antigen processing and presentation of exogenous antigen:HLA-C,HLA-DOB,HLA-DQA1,HLA-DRA,HLA-DRB1,HLA-E,TAP2 | antigen processing and presentation of peptide antigen:HLA-C,HLA-DOB,HLA-DQA1,HLA-DRA,HLA-DRB1,HLA-E,TAP2 | adaptive immune response:HLA-C,HLA-DOB,HLA-DQA1,HLA-DRA,HLA-DRB…	OHP17_all	20.7509	0.024888	0.0157791	0.0157791	3549	0.156682	0.0558435	2.29926	0	0.20532	0.0474874	4.81404	0	0.077609	0.0991911	0.362542	0	0.491238	0.0516144	20.7509	0	0.495399	0.0581162	16.8131	0	0.47444	0.0951523	6.21168	0.351241	0.0850042
rs41545213:31382910:C:T	6	31382910	6p21.33	T	C	0.999	FALSE	rs145827824:32103749:C:G	0.422257	MICA (0 kb, 3'utr/3 prime UTR/MODIFIER); HCP5 (0 kb, intron/Intron/MODIFIER | nc-RNA/Non coding transcript/MODIFIER); LINC01149 (27 kb); HLA-S (33 kb); ZDHHC20P2 (34 kb); FGFR3P1 (37 kb); RNU6-283P (45 kb); DHFRP2 (48 kb)	1.91	0.645 Heel bone mineral density // 0.595 Bioavailable testosterone levels // 0.585 Neurological blood protein biomarker levels // 0.554 Aspartate aminotransferase levels in low alcohol consumption // 0.517 Blood protein levels	- | ABCF1 | ABHD16A | AGER | AIF1 | APOM | ATF6B | ATP6V1G2 | ATP6V1G2-DDX39B | BAG6 | C2 | C4A | C4B | C4B_2 | C6orf10 | C6orf48 | CCHCR1 | CLIC1 | CSNK2B | DDAH2 | DDR1 | DDX39B | DXO | FLOT1 | GPANK1 | GPSM3 | GTF2H4 | HCG22 | HCG23 | HCG27 | HCG4B | HCG4P3 | HCP5 | HLA-A | HLA-B | HLA-C | HLA-DOB | HLA-DQA1 | HLA-DQA2 | HLA-DQB1 | HLA-DRA | HLA-DRB1 | HLA-DRB2 | HLA-DRB3 | HLA-DRB6 | HLA-DRB7…	BTN3A2 | C6orf10 | HLA-DQA1 | HLA-DRB1 | HLA-DRB4 | HLA-DRB5 | HLA-F | HLA-H | HLA-V | IER3 | NHP2 | PARP2 | TAP2 | TMEM154 | ZNRD1	Systemic lupus erythematosus:HLA-DOB,HLA-DQA1,HLA-DRA,HLA-DRB1 | Antigen processing and presentation:HLA-C,HLA-DOB,HLA-DQA1,HLA-DRA,HLA-DRB1,HLA-E,HSPA1A,HSPA1B,HSPA1L,TAP2 | Allograft rejection:HLA-C,HLA-DOB,HLA-DQA1,HLA-DRA,HLA-DRB1,HLA-E | Type I diabetes mellitus:HLA-C,HLA-DOB,HLA-DQA1,HLA-DRA,HLA-DRB1,HLA-E,LTA | Graft-versus-host disease:HLA-C,HLA-DOB,HLA-DQA1,HLA-DRA,HLA-DRB1,HLA-E | Autoi…	Translocation of ZAP-70 to Immunological synapse:HLA-DQA1,HLA-DRA,HLA-DRB1 | Interferon gamma signaling:HLA-C,HLA-DQA1,HLA-DRA,HLA-DRB1,HLA-E | Generation of second messenger molecules:HLA-DQA1,HLA-DRA,HLA-DRB1 | Phosphorylation of CD3 and TCR zeta chains:HLA-DQA1,HLA-DRA,HLA-DRB1 | PD-1 signaling:HLA-DQA1,HLA-DRA,HLA-DRB1 | Interferon Signaling:HLA-C,HLA-DQA1,HLA-DRA,HLA-DRB1,HLA-E | RNA Polymer…	Kawasaki disease:BAG6,HLA-C,HLA-DRB1,HLA-E,PRRC2A | lymphadenitis:BAG6,HLA-C,HLA-DRB1,HLA-E,PRRC2A | lymph node disease:BAG6,HLA-C,HLA-DRB1,HLA-E,PRRC2A | leprosy:HLA-DRB1,LTA,MICA | Graves' disease:HLA-C,HLA-DQA1,HLA-DRB1,TAP2 | sarcoidosis:DDR1,HLA-DQA1,HLA-DRB1,HSPA1L,LTA | hypersensitivity reaction type IV disease:DDR1,HLA-DQA1,HLA-DRB1,HSPA1L,LTA | hepatitis:HLA-C,HLA-DQA1,HLA-DRB1,HLA-E,LTA…	antigen processing and presentation of exogenous peptide antigen:HLA-C,HLA-DOB,HLA-DQA1,HLA-DRA,HLA-DRB1,HLA-E,TAP2 | antigen processing and presentation of exogenous antigen:HLA-C,HLA-DOB,HLA-DQA1,HLA-DRA,HLA-DRB1,HLA-E,TAP2 | antigen processing and presentation of peptide antigen:HLA-C,HLA-DOB,HLA-DQA1,HLA-DRA,HLA-DRB1,HLA-E,TAP2 | adaptive immune response:HLA-C,HLA-DOB,HLA-DQA1,HLA-DRA,HLA-DRB…	OHP17_all	20.7509	0.024888	0.0157791	0.0157791	3549	0.156682	0.0558435	2.29926	0	0.20532	0.0474874	4.81404	0	0.077609	0.0991911	0.362542	0	0.491238	0.0516144	20.7509	0	0.495399	0.0581162	16.8131	0	0.47444	0.0951523	6.21168	0.351241	0.0850042
rs41553616:31379990:C:G	6	31379990	6p21.33	G	C	0.997835	FALSE	rs145827824:32103749:C:G	0.422257	MICA (0 kb, exon/Missense/MODERATE); HCP5 (0 kb, intron/Intron/MODIFIER | nc-RNA/Non coding transcript/MODIFIER); LINC01149 (29 kb); HLA-S (30 kb); ZDHHC20P2 (31 kb); FGFR3P1 (34 kb); RNU6-283P (42 kb); DHFRP2 (45 kb)	5.787	0.645 Heel bone mineral density // 0.595 Bioavailable testosterone levels // 0.585 Neurological blood protein biomarker levels // 0.554 Aspartate aminotransferase levels in low alcohol consumption // 0.517 Blood protein levels	- | ABCF1 | ABHD16A | AGER | AIF1 | APOM | ATF6B | ATP6V1G2 | ATP6V1G2-DDX39B | BAG6 | C2 | C4A | C4B | C4B_2 | C6orf10 | C6orf48 | CCHCR1 | CLIC1 | CSNK2B | DDAH2 | DDR1 | DDX39B | DHX16 | DOM3Z | DXO | EHMT2 | FLOT1 | GPANK1 | GPSM3 | GTF2H4 | HCG22 | HCG23 | HCG27 | HCG4B | HCG4P3 | HCP5 | HLA-A | HLA-B | HLA-C | HLA-DOB | HLA-DQA1 | HLA-DQA2 | HLA-DQB1 | HLA-DQB2 | HLA-DRA | HLA-DRB1 | HLA-DR…	BTN3A2 | C6orf10 | CDC42EP4 | HLA-A | HLA-DQA1 | HLA-DQA2 | HLA-DRB1 | HLA-DRB4 | HLA-DRB5 | HLA-F | HLA-H | HLA-V | IER3 | NHP2 | PARP2 | TAP2 | TMEM154 | XRCC6 | ZNRD1	Systemic lupus erythematosus:HLA-DOB,HLA-DQA1,HLA-DRA,HLA-DRB1 | Antigen processing and presentation:HLA-C,HLA-DOB,HLA-DQA1,HLA-DRA,HLA-DRB1,HLA-E,HSPA1A,HSPA1B,HSPA1L,TAP2 | Allograft rejection:HLA-C,HLA-DOB,HLA-DQA1,HLA-DRA,HLA-DRB1,HLA-E | Type I diabetes mellitus:HLA-C,HLA-DOB,HLA-DQA1,HLA-DRA,HLA-DRB1,HLA-E,LTA | Graft-versus-host disease:HLA-C,HLA-DOB,HLA-DQA1,HLA-DRA,HLA-DRB1,HLA-E | Autoi…	Translocation of ZAP-70 to Immunological synapse:HLA-DQA1,HLA-DRA,HLA-DRB1 | Interferon gamma signaling:HLA-C,HLA-DQA1,HLA-DRA,HLA-DRB1,HLA-E | Generation of second messenger molecules:HLA-DQA1,HLA-DRA,HLA-DRB1 | Phosphorylation of CD3 and TCR zeta chains:HLA-DQA1,HLA-DRA,HLA-DRB1 | PD-1 signaling:HLA-DQA1,HLA-DRA,HLA-DRB1 | Interferon Signaling:HLA-C,HLA-DQA1,HLA-DRA,HLA-DRB1,HLA-E | RNA Polymer…	Kawasaki disease:BAG6,HLA-C,HLA-DRB1,HLA-E,PRRC2A | lymphadenitis:BAG6,HLA-C,HLA-DRB1,HLA-E,PRRC2A | lymph node disease:BAG6,HLA-C,HLA-DRB1,HLA-E,PRRC2A | leprosy:HLA-DRB1,LTA,MICA | Graves' disease:HLA-C,HLA-DQA1,HLA-DRB1,TAP2 | sarcoidosis:DDR1,HLA-DQA1,HLA-DRB1,HSPA1L,LTA | hypersensitivity reaction type IV disease:DDR1,HLA-DQA1,HLA-DRB1,HSPA1L,LTA | hepatitis:HLA-C,HLA-DQA1,HLA-DRB1,HLA-E,LTA…	antigen processing and presentation of exogenous peptide antigen:HLA-C,HLA-DOB,HLA-DQA1,HLA-DRA,HLA-DRB1,HLA-E,TAP2 | antigen processing and presentation of exogenous antigen:HLA-C,HLA-DOB,HLA-DQA1,HLA-DRA,HLA-DRB1,HLA-E,TAP2 | antigen processing and presentation of peptide antigen:HLA-C,HLA-DOB,HLA-DQA1,HLA-DRA,HLA-DRB1,HLA-E,TAP2 | adaptive immune response:HLA-C,HLA-DOB,HLA-DQA1,HLA-DRA,HLA-DRB…	OHP17_all	20.7509	0.024888	0.0157791	0.0157791	3549	0.156682	0.0558435	2.29926	0	0.20532	0.0474874	4.81404	0	0.077609	0.0991911	0.362542	0	0.491238	0.0516144	20.7509	0	0.495399	0.0581162	16.8131	0	0.47444	0.0951523	6.21168	0.351241	0.0850042
rs60543763:31387515:C:T	6	31387515	6p21.33	T	C	0.999	FALSE	rs145827824:32103749:C:G	0.422257	HCP5 (0 kb, intron/Intron/MODIFIER | nc-RNA/Non coding transcript/MODIFIER); MICA (4.4 kb, near_gene/Downstream gene/MODIFIER); LINC01149 (22 kb); HLA-S (37 kb); ZDHHC20P2 (39 kb); FGFR3P1 (42 kb); RNU6-283P (49 kb)	4.645	0.645 Heel bone mineral density // 0.595 Bioavailable testosterone levels // 0.585 Neurological blood protein biomarker levels // 0.554 Aspartate aminotransferase levels in low alcohol consumption // 0.517 Blood protein levels	- | ABCF1 | ABHD16A | AGER | AIF1 | APOM | ATF6B | ATP6V1G2 | ATP6V1G2-DDX39B | BAG6 | C2 | C4A | C4B | C4B_2 | C6orf10 | C6orf48 | CCHCR1 | CLIC1 | CSNK2B | DDAH2 | DDR1 | DDX39B | DHX16 | DOM3Z | DXO | EHMT2 | FLOT1 | GPANK1 | GPSM3 | GTF2H4 | HCG22 | HCG23 | HCG27 | HCG4B | HCG4P3 | HCP5 | HLA-A | HLA-B | HLA-C | HLA-DOB | HLA-DQA1 | HLA-DQA2 | HLA-DQB1 | HLA-DQB2 | HLA-DRA | HLA-DRB1 | HLA-DR…	BTN3A2 | C6orf10 | CDC42EP4 | HLA-A | HLA-DQA1 | HLA-DQA2 | HLA-DRB1 | HLA-DRB4 | HLA-DRB5 | HLA-F | HLA-H | HLA-V | IER3 | NHP2 | PARP2 | TAP2 | TMEM154 | XRCC6 | ZNRD1	Systemic lupus erythematosus:HLA-DOB,HLA-DQA1,HLA-DRA,HLA-DRB1 | Antigen processing and presentation:HLA-C,HLA-DOB,HLA-DQA1,HLA-DRA,HLA-DRB1,HLA-E,HSPA1A,HSPA1B,HSPA1L,TAP2 | Allograft rejection:HLA-C,HLA-DOB,HLA-DQA1,HLA-DRA,HLA-DRB1,HLA-E | Type I diabetes mellitus:HLA-C,HLA-DOB,HLA-DQA1,HLA-DRA,HLA-DRB1,HLA-E,LTA | Graft-versus-host disease:HLA-C,HLA-DOB,HLA-DQA1,HLA-DRA,HLA-DRB1,HLA-E | Autoi…	Translocation of ZAP-70 to Immunological synapse:HLA-DQA1,HLA-DRA,HLA-DRB1 | Interferon gamma signaling:HLA-C,HLA-DQA1,HLA-DRA,HLA-DRB1,HLA-E | Generation of second messenger molecules:HLA-DQA1,HLA-DRA,HLA-DRB1 | Phosphorylation of CD3 and TCR zeta chains:HLA-DQA1,HLA-DRA,HLA-DRB1 | PD-1 signaling:HLA-DQA1,HLA-DRA,HLA-DRB1 | Interferon Signaling:HLA-C,HLA-DQA1,HLA-DRA,HLA-DRB1,HLA-E | RNA Polymer…	Kawasaki disease:BAG6,HLA-C,HLA-DRB1,HLA-E,PRRC2A | lymphadenitis:BAG6,HLA-C,HLA-DRB1,HLA-E,PRRC2A | lymph node disease:BAG6,HLA-C,HLA-DRB1,HLA-E,PRRC2A | leprosy:HLA-DRB1,LTA,MICA | Graves' disease:HLA-C,HLA-DQA1,HLA-DRB1,TAP2 | sarcoidosis:DDR1,HLA-DQA1,HLA-DRB1,HSPA1L,LTA | hypersensitivity reaction type IV disease:DDR1,HLA-DQA1,HLA-DRB1,HSPA1L,LTA | hepatitis:HLA-C,HLA-DQA1,HLA-DRB1,HLA-E,LTA…	antigen processing and presentation of exogenous peptide antigen:HLA-C,HLA-DOB,HLA-DQA1,HLA-DRA,HLA-DRB1,HLA-E,TAP2 | antigen processing and presentation of exogenous antigen:HLA-C,HLA-DOB,HLA-DQA1,HLA-DRA,HLA-DRB1,HLA-E,TAP2 | antigen processing and presentation of peptide antigen:HLA-C,HLA-DOB,HLA-DQA1,HLA-DRA,HLA-DRB1,HLA-E,TAP2 | adaptive immune response:HLA-C,HLA-DOB,HLA-DQA1,HLA-DRA,HLA-DRB…	OHP17_all	20.7509	0.024888	0.0157791	0.0157791	3549	0.156682	0.0558435	2.29926	0	0.20532	0.0474874	4.81404	0	0.077609	0.0991911	0.362542	0	0.491238	0.0516144	20.7509	0	0.495399	0.0581162	16.8131	0	0.47444	0.0951523	6.21168	0.351241	0.0850042
rs61079385:31384551:C:T	6	31384551	6p21.33	T	C	0.999	FALSE	rs145827824:32103749:C:G	0.422257	HCP5 (0 kb, intron/Intron/MODIFIER | nc-RNA/Non coding transcript/MODIFIER); MICA (1.5 kb, near_gene/Downstream gene/MODIFIER); LINC01149 (25 kb); HLA-S (34 kb); ZDHHC20P2 (36 kb); FGFR3P1 (39 kb); RNU6-283P (47 kb); DHFRP2 (50 kb)	9.598	0.645 Heel bone mineral density // 0.595 Bioavailable testosterone levels // 0.585 Neurological blood protein biomarker levels // 0.554 Aspartate aminotransferase levels in low alcohol consumption // 0.517 Blood protein levels	- | ABCF1 | ABHD16A | AGER | AIF1 | APOM | ATF6B | ATP6V1G2 | ATP6V1G2-DDX39B | BAG6 | C2 | C4A | C4B | C4B_2 | C6orf10 | C6orf48 | CCHCR1 | CLIC1 | CSNK2B | DDAH2 | DDR1 | DDX39B | DHX16 | DOM3Z | DXO | EHMT2 | FLOT1 | GPANK1 | GPSM3 | GTF2H4 | HCG22 | HCG23 | HCG27 | HCG4B | HCG4P3 | HCP5 | HLA-A | HLA-B | HLA-C | HLA-DOB | HLA-DQA1 | HLA-DQA2 | HLA-DQB1 | HLA-DQB2 | HLA-DRA | HLA-DRB1 | HLA-DR…	BTN3A2 | C6orf10 | CDC42EP4 | HLA-A | HLA-DQA1 | HLA-DQA2 | HLA-DRB1 | HLA-DRB4 | HLA-DRB5 | HLA-F | HLA-H | HLA-V | IER3 | NHP2 | PARP2 | TAP2 | TMEM154 | XRCC6 | ZNRD1	Systemic lupus erythematosus:HLA-DOB,HLA-DQA1,HLA-DRA,HLA-DRB1 | Antigen processing and presentation:HLA-C,HLA-DOB,HLA-DQA1,HLA-DRA,HLA-DRB1,HLA-E,HSPA1A,HSPA1B,HSPA1L,TAP2 | Allograft rejection:HLA-C,HLA-DOB,HLA-DQA1,HLA-DRA,HLA-DRB1,HLA-E | Type I diabetes mellitus:HLA-C,HLA-DOB,HLA-DQA1,HLA-DRA,HLA-DRB1,HLA-E,LTA | Graft-versus-host disease:HLA-C,HLA-DOB,HLA-DQA1,HLA-DRA,HLA-DRB1,HLA-E | Autoi…	Translocation of ZAP-70 to Immunological synapse:HLA-DQA1,HLA-DRA,HLA-DRB1 | Interferon gamma signaling:HLA-C,HLA-DQA1,HLA-DRA,HLA-DRB1,HLA-E | Generation of second messenger molecules:HLA-DQA1,HLA-DRA,HLA-DRB1 | Phosphorylation of CD3 and TCR zeta chains:HLA-DQA1,HLA-DRA,HLA-DRB1 | PD-1 signaling:HLA-DQA1,HLA-DRA,HLA-DRB1 | Interferon Signaling:HLA-C,HLA-DQA1,HLA-DRA,HLA-DRB1,HLA-E | RNA Polymer…	Kawasaki disease:BAG6,HLA-C,HLA-DRB1,HLA-E,PRRC2A | lymphadenitis:BAG6,HLA-C,HLA-DRB1,HLA-E,PRRC2A | lymph node disease:BAG6,HLA-C,HLA-DRB1,HLA-E,PRRC2A | leprosy:HLA-DRB1,LTA,MICA | Graves' disease:HLA-C,HLA-DQA1,HLA-DRB1,TAP2 | sarcoidosis:DDR1,HLA-DQA1,HLA-DRB1,HSPA1L,LTA | hypersensitivity reaction type IV disease:DDR1,HLA-DQA1,HLA-DRB1,HSPA1L,LTA | hepatitis:HLA-C,HLA-DQA1,HLA-DRB1,HLA-E,LTA…	antigen processing and presentation of exogenous peptide antigen:HLA-C,HLA-DOB,HLA-DQA1,HLA-DRA,HLA-DRB1,HLA-E,TAP2 | antigen processing and presentation of exogenous antigen:HLA-C,HLA-DOB,HLA-DQA1,HLA-DRA,HLA-DRB1,HLA-E,TAP2 | antigen processing and presentation of peptide antigen:HLA-C,HLA-DOB,HLA-DQA1,HLA-DRA,HLA-DRB1,HLA-E,TAP2 | adaptive immune response:HLA-C,HLA-DOB,HLA-DQA1,HLA-DRA,HLA-DRB…	OHP17_all	20.7509	0.024888	0.0157791	0.0157791	3549	0.156682	0.0558435	2.29926	0	0.20532	0.0474874	4.81404	0	0.077609	0.0991911	0.362542	0	0.491238	0.0516144	20.7509	0	0.495399	0.0581162	16.8131	0	0.47444	0.0951523	6.21168	0.351241	0.0850042
rs61624501:31390441:T:C	6	31390441	6p21.33	C	T	0.999	FALSE	rs145827824:32103749:C:G	0.422257	HCP5 (0 kb, intron/Intron/MODIFIER | nc-RNA/Non coding transcript/MODIFIER); MICA (7.3 kb); LINC01149 (19 kb); HLA-S (40 kb); ZDHHC20P2 (42 kb); FGFR3P1 (45 kb)	1.641	0.645 Heel bone mineral density // 0.595 Bioavailable testosterone levels // 0.585 Neurological blood protein biomarker levels // 0.554 Aspartate aminotransferase levels in low alcohol consumption // 0.517 Blood protein levels	- | ABCF1 | ABHD16A | AGER | AIF1 | APOM | ATF6B | ATP6V1G2 | ATP6V1G2-DDX39B | BAG6 | C2 | C4A | C4B | C4B_2 | C6orf10 | C6orf48 | CCHCR1 | CLIC1 | CSNK2B | DDAH2 | DDR1 | DDX39B | DHX16 | DOM3Z | DXO | EHMT2 | FLOT1 | GPANK1 | GPSM3 | GTF2H4 | HCG22 | HCG23 | HCG27 | HCG4B | HCG4P3 | HCP5 | HLA-A | HLA-B | HLA-C | HLA-DOB | HLA-DQA1 | HLA-DQA2 | HLA-DQB1 | HLA-DQB2 | HLA-DRA | HLA-DRB1 | HLA-DR…	BTN3A2 | C6orf10 | CDC42EP4 | HLA-A | HLA-DQA1 | HLA-DQA2 | HLA-DRB1 | HLA-DRB4 | HLA-DRB5 | HLA-F | HLA-H | HLA-V | IER3 | NHP2 | PARP2 | TAP2 | TMEM154 | XRCC6 | ZNRD1	Systemic lupus erythematosus:HLA-DOB,HLA-DQA1,HLA-DRA,HLA-DRB1 | Antigen processing and presentation:HLA-C,HLA-DOB,HLA-DQA1,HLA-DRA,HLA-DRB1,HLA-E,HSPA1A,HSPA1B,HSPA1L,TAP2 | Allograft rejection:HLA-C,HLA-DOB,HLA-DQA1,HLA-DRA,HLA-DRB1,HLA-E | Type I diabetes mellitus:HLA-C,HLA-DOB,HLA-DQA1,HLA-DRA,HLA-DRB1,HLA-E,LTA | Graft-versus-host disease:HLA-C,HLA-DOB,HLA-DQA1,HLA-DRA,HLA-DRB1,HLA-E | Autoi…	Translocation of ZAP-70 to Immunological synapse:HLA-DQA1,HLA-DRA,HLA-DRB1 | Interferon gamma signaling:HLA-C,HLA-DQA1,HLA-DRA,HLA-DRB1,HLA-E | Generation of second messenger molecules:HLA-DQA1,HLA-DRA,HLA-DRB1 | Phosphorylation of CD3 and TCR zeta chains:HLA-DQA1,HLA-DRA,HLA-DRB1 | PD-1 signaling:HLA-DQA1,HLA-DRA,HLA-DRB1 | Interferon Signaling:HLA-C,HLA-DQA1,HLA-DRA,HLA-DRB1,HLA-E | RNA Polymer…	Kawasaki disease:BAG6,HLA-C,HLA-DRB1,HLA-E,PRRC2A | lymphadenitis:BAG6,HLA-C,HLA-DRB1,HLA-E,PRRC2A | lymph node disease:BAG6,HLA-C,HLA-DRB1,HLA-E,PRRC2A | leprosy:HLA-DRB1,LTA,MICA | Graves' disease:HLA-C,HLA-DQA1,HLA-DRB1,TAP2 | sarcoidosis:DDR1,HLA-DQA1,HLA-DRB1,HSPA1L,LTA | hypersensitivity reaction type IV disease:DDR1,HLA-DQA1,HLA-DRB1,HSPA1L,LTA | hepatitis:HLA-C,HLA-DQA1,HLA-DRB1,HLA-E,LTA…	antigen processing and presentation of exogenous peptide antigen:HLA-C,HLA-DOB,HLA-DQA1,HLA-DRA,HLA-DRB1,HLA-E,TAP2 | antigen processing and presentation of exogenous antigen:HLA-C,HLA-DOB,HLA-DQA1,HLA-DRA,HLA-DRB1,HLA-E,TAP2 | antigen processing and presentation of peptide antigen:HLA-C,HLA-DOB,HLA-DQA1,HLA-DRA,HLA-DRB1,HLA-E,TAP2 | adaptive immune response:HLA-C,HLA-DOB,HLA-DQA1,HLA-DRA,HLA-DRB…	OHP17_all	20.7509	0.024888	0.0157791	0.0157791	3549	0.156682	0.0558435	2.29926	0	0.20532	0.0474874	4.81404	0	0.077609	0.0991911	0.362542	0	0.491238	0.0516144	20.7509	0	0.495399	0.0581162	16.8131	0	0.47444	0.0951523	6.21168	0.351241	0.0850042
rs73402213:31387288:C:T	6	31387288	6p21.33	T	C	0.999	FALSE	rs145827824:32103749:C:G	0.422257	HCP5 (0 kb, intron/Intron/MODIFIER | nc-RNA/Non coding transcript/MODIFIER); MICA (4.2 kb, near_gene/Downstream gene/MODIFIER); LINC01149 (22 kb); HLA-S (37 kb); ZDHHC20P2 (39 kb); FGFR3P1 (41 kb); RNU6-283P (49 kb)	8.055	0.645 Heel bone mineral density // 0.595 Bioavailable testosterone levels // 0.585 Neurological blood protein biomarker levels // 0.554 Aspartate aminotransferase levels in low alcohol consumption // 0.517 Blood protein levels	- | ABCF1 | ABHD16A | AGER | AIF1 | APOM | ATF6B | ATP6V1G2 | ATP6V1G2-DDX39B | BAG6 | C2 | C4A | C4B | C4B_2 | C6orf10 | C6orf48 | CCHCR1 | CLIC1 | CSNK2B | DDAH2 | DDR1 | DDX39B | DHX16 | DOM3Z | DXO | EHMT2 | FLOT1 | GPANK1 | GPSM3 | GTF2H4 | HCG22 | HCG23 | HCG27 | HCG4B | HCG4P3 | HCP5 | HLA-A | HLA-B | HLA-C | HLA-DOB | HLA-DQA1 | HLA-DQA2 | HLA-DQB1 | HLA-DQB2 | HLA-DRA | HLA-DRB1 | HLA-DR…	BTN3A2 | C6orf10 | CDC42EP4 | HLA-A | HLA-DQA1 | HLA-DQA2 | HLA-DRB1 | HLA-DRB4 | HLA-DRB5 | HLA-F | HLA-H | HLA-V | IER3 | NHP2 | PARP2 | TAP2 | TMEM154 | XRCC6 | ZNRD1	Systemic lupus erythematosus:HLA-DOB,HLA-DQA1,HLA-DRA,HLA-DRB1 | Antigen processing and presentation:HLA-C,HLA-DOB,HLA-DQA1,HLA-DRA,HLA-DRB1,HLA-E,HSPA1A,HSPA1B,HSPA1L,TAP2 | Allograft rejection:HLA-C,HLA-DOB,HLA-DQA1,HLA-DRA,HLA-DRB1,HLA-E | Type I diabetes mellitus:HLA-C,HLA-DOB,HLA-DQA1,HLA-DRA,HLA-DRB1,HLA-E,LTA | Graft-versus-host disease:HLA-C,HLA-DOB,HLA-DQA1,HLA-DRA,HLA-DRB1,HLA-E | Autoi…	Translocation of ZAP-70 to Immunological synapse:HLA-DQA1,HLA-DRA,HLA-DRB1 | Interferon gamma signaling:HLA-C,HLA-DQA1,HLA-DRA,HLA-DRB1,HLA-E | Generation of second messenger molecules:HLA-DQA1,HLA-DRA,HLA-DRB1 | Phosphorylation of CD3 and TCR zeta chains:HLA-DQA1,HLA-DRA,HLA-DRB1 | PD-1 signaling:HLA-DQA1,HLA-DRA,HLA-DRB1 | Interferon Signaling:HLA-C,HLA-DQA1,HLA-DRA,HLA-DRB1,HLA-E | RNA Polymer…	Kawasaki disease:BAG6,HLA-C,HLA-DRB1,HLA-E,PRRC2A | lymphadenitis:BAG6,HLA-C,HLA-DRB1,HLA-E,PRRC2A | lymph node disease:BAG6,HLA-C,HLA-DRB1,HLA-E,PRRC2A | leprosy:HLA-DRB1,LTA,MICA | Graves' disease:HLA-C,HLA-DQA1,HLA-DRB1,TAP2 | sarcoidosis:DDR1,HLA-DQA1,HLA-DRB1,HSPA1L,LTA | hypersensitivity reaction type IV disease:DDR1,HLA-DQA1,HLA-DRB1,HSPA1L,LTA | hepatitis:HLA-C,HLA-DQA1,HLA-DRB1,HLA-E,LTA…	antigen processing and presentation of exogenous peptide antigen:HLA-C,HLA-DOB,HLA-DQA1,HLA-DRA,HLA-DRB1,HLA-E,TAP2 | antigen processing and presentation of exogenous antigen:HLA-C,HLA-DOB,HLA-DQA1,HLA-DRA,HLA-DRB1,HLA-E,TAP2 | antigen processing and presentation of peptide antigen:HLA-C,HLA-DOB,HLA-DQA1,HLA-DRA,HLA-DRB1,HLA-E,TAP2 | adaptive immune response:HLA-C,HLA-DOB,HLA-DQA1,HLA-DRA,HLA-DRB…	OHP17_all	20.7509	0.024888	0.0157791	0.0157791	3549	0.156682	0.0558435	2.29926	0	0.20532	0.0474874	4.81404	0	0.077609	0.0991911	0.362542	0	0.491238	0.0516144	20.7509	0	0.495399	0.0581162	16.8131	0	0.47444	0.0951523	6.21168	0.351241	0.0850042
rs114612357:31368702:C:A	6	31368702	6p21.33	A	C	0.999	FALSE	rs145827824:32103749:C:G	0.422257	HCP5 (0 kb, intron/Intron/MODIFIER | nc-RNA/Non coding transcript/MODIFIER); Y_RNA (1.2 kb, near_gene/Downstream gene/MODIFIER); MICA (2.7 kb, near_gene/Upstream gene/MODIFIER); HLA-S (19 kb); ZDHHC20P2 (20 kb); FGFR3P1 (23 kb); RNU6-283P (31 kb); DHFRP2 (34 kb); LINC01149 (41 kb); HLA-B (44 kb)	7.715	0.645 Heel bone mineral density // 0.595 Bioavailable testosterone levels // 0.585 Neurological blood protein biomarker levels // 0.554 Aspartate aminotransferase levels in low alcohol consumption // 0.517 Blood protein levels	- | ABCF1 | ABHD16A | AGER | AIF1 | APOM | ATF6B | ATP6V1G2 | ATP6V1G2-DDX39B | BAG6 | C2 | C4A | C4B | C4B_2 | C6orf10 | C6orf48 | CCHCR1 | CLIC1 | CSNK2B | DDAH2 | DDR1 | DDX39B | DHX16 | DOM3Z | DXO | EHMT2 | FLOT1 | GPANK1 | GPSM3 | GTF2H4 | HCG22 | HCG23 | HCG27 | HCG4B | HCG4P3 | HCP5 | HLA-A | HLA-B | HLA-C | HLA-DOB | HLA-DQA1 | HLA-DQA2 | HLA-DQB1 | HLA-DQB2 | HLA-DRA | HLA-DRB1 | HLA-DR…	BTN3A2 | C6orf10 | CDC42EP4 | HLA-A | HLA-DQA1 | HLA-DQA2 | HLA-DRB1 | HLA-DRB4 | HLA-DRB5 | HLA-F | HLA-H | HLA-V | IER3 | NHP2 | PARP2 | TAP2 | TMEM154 | XRCC6 | ZNRD1	Systemic lupus erythematosus:HLA-DOB,HLA-DQA1,HLA-DRA,HLA-DRB1 | Antigen processing and presentation:HLA-B,HLA-C,HLA-DOB,HLA-DQA1,HLA-DRA,HLA-DRB1,HLA-E,HSPA1A,HSPA1B,HSPA1L,TAP2 | Allograft rejection:HLA-B,HLA-C,HLA-DOB,HLA-DQA1,HLA-DRA,HLA-DRB1,HLA-E | Type I diabetes mellitus:HLA-B,HLA-C,HLA-DOB,HLA-DQA1,HLA-DRA,HLA-DRB1,HLA-E,LTA | Graft-versus-host disease:HLA-B,HLA-C,HLA-DOB,HLA-DQA1,HLA-DR…	Translocation of ZAP-70 to Immunological synapse:HLA-DQA1,HLA-DRA,HLA-DRB1 | Interferon gamma signaling:HLA-B,HLA-C,HLA-DQA1,HLA-DRA,HLA-DRB1,HLA-E | Generation of second messenger molecules:HLA-DQA1,HLA-DRA,HLA-DRB1 | Phosphorylation of CD3 and TCR zeta chains:HLA-DQA1,HLA-DRA,HLA-DRB1 | PD-1 signaling:HLA-DQA1,HLA-DRA,HLA-DRB1 | Interferon Signaling:HLA-B,HLA-C,HLA-DQA1,HLA-DRA,HLA-DRB1,HLA-E |…	Kawasaki disease:BAG6,HLA-B,HLA-C,HLA-DRB1,HLA-E,PRRC2A | lymphadenitis:BAG6,HLA-B,HLA-C,HLA-DRB1,HLA-E,PRRC2A | lymph node disease:BAG6,HLA-B,HLA-C,HLA-DRB1,HLA-E,PRRC2A | leprosy:HLA-DRB1,LTA,MICA | Graves' disease:HLA-B,HLA-C,HLA-DQA1,HLA-DRB1,TAP2 | sarcoidosis:DDR1,HLA-B,HLA-DQA1,HLA-DRB1,HSPA1L,LTA | hypersensitivity reaction type IV disease:DDR1,HLA-B,HLA-DQA1,HLA-DRB1,HSPA1L,LTA | hepatit…	antigen processing and presentation of exogenous peptide antigen:HLA-B,HLA-C,HLA-DOB,HLA-DQA1,HLA-DRA,HLA-DRB1,HLA-E,TAP2 | antigen processing and presentation of exogenous antigen:HLA-B,HLA-C,HLA-DOB,HLA-DQA1,HLA-DRA,HLA-DRB1,HLA-E,TAP2 | antigen processing and presentation of peptide antigen:HLA-B,HLA-C,HLA-DOB,HLA-DQA1,HLA-DRA,HLA-DRB1,HLA-E,TAP2 | adaptive immune response:HLA-B,HLA-C,HLA-DOB,…	OHP17_all	20.7504	0.0248875	0.0157806	0.0157806	3549	0.156677	0.0558425	2.29923	0	0.205253	0.0474834	4.81195	0	0.0776802	0.0992008	0.36292	0	0.491211	0.0516121	20.7504	0	0.495364	0.0581119	16.8133	0	0.474421	0.0951523	6.21125	0.351067	0.0850082
rs141312099:31364845:G:GT	6	31364845	6p21.33	GT	G	0.999	FALSE	rs145827824:32103749:C:G	0.422257	XXbac-BPG181B23.7 (1.6 kb, near_gene/Upstream gene/MODIFIER); HCP5 (3.6 kb, near_gene/Upstream gene/MODIFIER); MICA (6.5 kb); HLA-S (15 kb); ZDHHC20P2 (16 kb); FGFR3P1 (19 kb); RNU6-283P (27 kb); DHFRP2 (30 kb); HLA-B (40 kb); LINC01149 (45 kb)	0.259	0.645 Heel bone mineral density // 0.595 Bioavailable testosterone levels // 0.585 Neurological blood protein biomarker levels // 0.554 Aspartate aminotransferase levels in low alcohol consumption // 0.517 Blood protein levels	- | ABCF1 | ABHD16A | AGER | AIF1 | APOM | ATF6B | ATP6V1G2 | ATP6V1G2-DDX39B | BAG6 | C2 | C4A | C4B | C4B_2 | C6orf10 | C6orf48 | CCHCR1 | CLIC1 | CSNK2B | DDAH2 | DDR1 | DDX39B | DHX16 | DOM3Z | DXO | EHMT2 | FLOT1 | GPANK1 | GPSM3 | GTF2H4 | HCG22 | HCG23 | HCG27 | HCG4B | HCG4P3 | HCP5 | HLA-A | HLA-B | HLA-C | HLA-DOB | HLA-DQA1 | HLA-DQA2 | HLA-DQB1 | HLA-DQB2 | HLA-DRA | HLA-DRB1 | HLA-DR…	BTN3A2 | C6orf10 | CDC42EP4 | HLA-A | HLA-DQA1 | HLA-DQA2 | HLA-DRB1 | HLA-DRB4 | HLA-DRB5 | HLA-F | HLA-H | HLA-V | IER3 | NHP2 | PARP2 | TAP2 | TMEM154 | XRCC6 | ZNRD1	Systemic lupus erythematosus:HLA-DOB,HLA-DQA1,HLA-DRA,HLA-DRB1 | Antigen processing and presentation:HLA-B,HLA-C,HLA-DOB,HLA-DQA1,HLA-DRA,HLA-DRB1,HLA-E,HSPA1A,HSPA1B,HSPA1L,TAP2 | Allograft rejection:HLA-B,HLA-C,HLA-DOB,HLA-DQA1,HLA-DRA,HLA-DRB1,HLA-E | Type I diabetes mellitus:HLA-B,HLA-C,HLA-DOB,HLA-DQA1,HLA-DRA,HLA-DRB1,HLA-E,LTA | Graft-versus-host disease:HLA-B,HLA-C,HLA-DOB,HLA-DQA1,HLA-DR…	Translocation of ZAP-70 to Immunological synapse:HLA-DQA1,HLA-DRA,HLA-DRB1 | Interferon gamma signaling:HLA-B,HLA-C,HLA-DQA1,HLA-DRA,HLA-DRB1,HLA-E | Generation of second messenger molecules:HLA-DQA1,HLA-DRA,HLA-DRB1 | Phosphorylation of CD3 and TCR zeta chains:HLA-DQA1,HLA-DRA,HLA-DRB1 | PD-1 signaling:HLA-DQA1,HLA-DRA,HLA-DRB1 | Interferon Signaling:HLA-B,HLA-C,HLA-DQA1,HLA-DRA,HLA-DRB1,HLA-E |…	Kawasaki disease:BAG6,HLA-B,HLA-C,HLA-DRB1,HLA-E,PRRC2A | lymphadenitis:BAG6,HLA-B,HLA-C,HLA-DRB1,HLA-E,PRRC2A | lymph node disease:BAG6,HLA-B,HLA-C,HLA-DRB1,HLA-E,PRRC2A | leprosy:HLA-DRB1,LTA,MICA | Graves' disease:HLA-B,HLA-C,HLA-DQA1,HLA-DRB1,TAP2 | sarcoidosis:DDR1,HLA-B,HLA-DQA1,HLA-DRB1,HSPA1L,LTA | hypersensitivity reaction type IV disease:DDR1,HLA-B,HLA-DQA1,HLA-DRB1,HSPA1L,LTA | hepatit…	antigen processing and presentation of exogenous peptide antigen:HLA-B,HLA-C,HLA-DOB,HLA-DQA1,HLA-DRA,HLA-DRB1,HLA-E,TAP2 | antigen processing and presentation of exogenous antigen:HLA-B,HLA-C,HLA-DOB,HLA-DQA1,HLA-DRA,HLA-DRB1,HLA-E,TAP2 | antigen processing and presentation of peptide antigen:HLA-B,HLA-C,HLA-DOB,HLA-DQA1,HLA-DRA,HLA-DRB1,HLA-E,TAP2 | adaptive immune response:HLA-B,HLA-C,HLA-DOB,…	OHP17_all	20.7499	0.0248867	0.0157854	0.0157854	3549	0.156673	0.05584	2.2993	0	0.205064	0.047472	4.80616	0	0.0778927	0.0992287	0.36405	0	0.491142	0.0516057	20.7499	0	0.495279	0.0580995	16.8146	0	0.474363	0.0951532	6.20977	0.350525	0.0850275
rs73400359:31374072:A:T	6	31374072	6p21.33	T	A	0.998417	FALSE	rs145827824:32103749:C:G	0.422257	HCP5 (0 kb, intron/Intron/MODIFIER | nc-RNA/Non coding transcript/MODIFIER); MICA (0 kb, intron/Intron/MODIFIER); Y_RNA (4 kb, near_gene/Upstream gene/MODIFIER); HLA-S (24 kb); ZDHHC20P2 (25 kb); FGFR3P1 (28 kb); LINC01149 (35 kb); RNU6-283P (36 kb); DHFRP2 (39 kb); HLA-B (49 kb)	0.396	0.645 Heel bone mineral density // 0.595 Bioavailable testosterone levels // 0.585 Neurological blood protein biomarker levels // 0.554 Aspartate aminotransferase levels in low alcohol consumption // 0.517 Blood protein levels	- | ABCF1 | ABHD16A | AGER | AIF1 | APOM | ATF6B | ATP6V1G2 | ATP6V1G2-DDX39B | BAG6 | C2 | C4A | C4B | C4B_2 | C6orf10 | C6orf48 | CCHCR1 | CLIC1 | CSNK2B | DDAH2 | DDR1 | DDX39B | DHX16 | DOM3Z | DXO | EHMT2 | FLOT1 | GPANK1 | GPSM3 | GTF2H4 | HCG22 | HCG23 | HCG27 | HCG4B | HCG4P3 | HCP5 | HLA-A | HLA-B | HLA-C | HLA-DOB | HLA-DQA1 | HLA-DQA2 | HLA-DQB1 | HLA-DQB2 | HLA-DRA | HLA-DRB1 | HLA-DR…	BTN3A2 | C6orf10 | CDC42EP4 | HLA-A | HLA-DQA1 | HLA-DQA2 | HLA-DRB1 | HLA-DRB4 | HLA-DRB5 | HLA-F | HLA-H | HLA-V | IER3 | NHP2 | PARP2 | TAP2 | TMEM154 | XRCC6 | ZNRD1	Systemic lupus erythematosus:HLA-DOB,HLA-DQA1,HLA-DRA,HLA-DRB1 | Antigen processing and presentation:HLA-B,HLA-C,HLA-DOB,HLA-DQA1,HLA-DRA,HLA-DRB1,HLA-E,HSPA1A,HSPA1B,HSPA1L,TAP2 | Allograft rejection:HLA-B,HLA-C,HLA-DOB,HLA-DQA1,HLA-DRA,HLA-DRB1,HLA-E | Type I diabetes mellitus:HLA-B,HLA-C,HLA-DOB,HLA-DQA1,HLA-DRA,HLA-DRB1,HLA-E,LTA | Graft-versus-host disease:HLA-B,HLA-C,HLA-DOB,HLA-DQA1,HLA-DR…	Translocation of ZAP-70 to Immunological synapse:HLA-DQA1,HLA-DRA,HLA-DRB1 | Interferon gamma signaling:HLA-B,HLA-C,HLA-DQA1,HLA-DRA,HLA-DRB1,HLA-E | Generation of second messenger molecules:HLA-DQA1,HLA-DRA,HLA-DRB1 | Phosphorylation of CD3 and TCR zeta chains:HLA-DQA1,HLA-DRA,HLA-DRB1 | PD-1 signaling:HLA-DQA1,HLA-DRA,HLA-DRB1 | Interferon Signaling:HLA-B,HLA-C,HLA-DQA1,HLA-DRA,HLA-DRB1,HLA-E |…	Kawasaki disease:BAG6,HLA-B,HLA-C,HLA-DRB1,HLA-E,PRRC2A | lymphadenitis:BAG6,HLA-B,HLA-C,HLA-DRB1,HLA-E,PRRC2A | lymph node disease:BAG6,HLA-B,HLA-C,HLA-DRB1,HLA-E,PRRC2A | leprosy:HLA-DRB1,LTA,MICA | Graves' disease:HLA-B,HLA-C,HLA-DQA1,HLA-DRB1,TAP2 | sarcoidosis:DDR1,HLA-B,HLA-DQA1,HLA-DRB1,HSPA1L,LTA | hypersensitivity reaction type IV disease:DDR1,HLA-B,HLA-DQA1,HLA-DRB1,HSPA1L,LTA | hepatit…	antigen processing and presentation of exogenous peptide antigen:HLA-B,HLA-C,HLA-DOB,HLA-DQA1,HLA-DRA,HLA-DRB1,HLA-E,TAP2 | antigen processing and presentation of exogenous antigen:HLA-B,HLA-C,HLA-DOB,HLA-DQA1,HLA-DRA,HLA-DRB1,HLA-E,TAP2 | antigen processing and presentation of peptide antigen:HLA-B,HLA-C,HLA-DOB,HLA-DQA1,HLA-DRA,HLA-DRB1,HLA-E,TAP2 | adaptive immune response:HLA-B,HLA-C,HLA-DOB,…	OHP17_all	20.7481	0.0248847	0.0157805	0.0157805	3549	0.156714	0.0558437	2.30003	0	0.20532	0.0474874	4.81404	0	0.0776707	0.099192	0.362904	0	0.491206	0.0516146	20.7481	0	0.495399	0.0581162	16.8131	0	0.474371	0.0951532	6.20994	0.350596	0.0849987
rs112142209:31368508:A:G	6	31368508	6p21.33	G	A	0.999	FALSE	rs145827824:32103749:C:G	0.422257	HCP5 (0 kb, nc-exon/Non coding transcript exon/MODIFIER | nc-RNA/Non coding transcript/MODIFIER); Y_RNA (1.4 kb, near_gene/Downstream gene/MODIFIER); MICA (2.8 kb, near_gene/Upstream gene/MODIFIER); HLA-S (18 kb); ZDHHC20P2 (20 kb); FGFR3P1 (23 kb); RNU6-283P (30 kb); DHFRP2 (34 kb); LINC01149 (41 kb); HLA-B (44 kb)	4.19	0.645 Heel bone mineral density // 0.595 Bioavailable testosterone levels // 0.585 Neurological blood protein biomarker levels // 0.554 Aspartate aminotransferase levels in low alcohol consumption // 0.517 Blood protein levels	- | ABCF1 | ABHD16A | AGER | AIF1 | APOM | ATF6B | ATP6V1G2 | ATP6V1G2-DDX39B | BAG6 | C2 | C4A | C4B | C4B_2 | C6orf10 | C6orf48 | CCHCR1 | CLIC1 | CSNK2B | DDAH2 | DDR1 | DDX39B | DHX16 | DOM3Z | DXO | EHMT2 | FLOT1 | GPANK1 | GPSM3 | GTF2H4 | HCG22 | HCG23 | HCG27 | HCG4B | HCG4P3 | HCP5 | HLA-A | HLA-B | HLA-C | HLA-DOB | HLA-DQA1 | HLA-DQA2 | HLA-DQB1 | HLA-DQB2 | HLA-DRA | HLA-DRB1 | HLA-DR…	BTN3A2 | C6orf10 | CDC42EP4 | HLA-A | HLA-DQA1 | HLA-DQA2 | HLA-DRB1 | HLA-DRB4 | HLA-DRB5 | HLA-F | HLA-H | HLA-V | IER3 | NHP2 | PARP2 | TAP2 | TMEM154 | XRCC6 | ZNRD1	Systemic lupus erythematosus:HLA-DOB,HLA-DQA1,HLA-DRA,HLA-DRB1 | Antigen processing and presentation:HLA-B,HLA-C,HLA-DOB,HLA-DQA1,HLA-DRA,HLA-DRB1,HLA-E,HSPA1A,HSPA1B,HSPA1L,TAP2 | Allograft rejection:HLA-B,HLA-C,HLA-DOB,HLA-DQA1,HLA-DRA,HLA-DRB1,HLA-E | Type I diabetes mellitus:HLA-B,HLA-C,HLA-DOB,HLA-DQA1,HLA-DRA,HLA-DRB1,HLA-E,LTA | Graft-versus-host disease:HLA-B,HLA-C,HLA-DOB,HLA-DQA1,HLA-DR…	Translocation of ZAP-70 to Immunological synapse:HLA-DQA1,HLA-DRA,HLA-DRB1 | Interferon gamma signaling:HLA-B,HLA-C,HLA-DQA1,HLA-DRA,HLA-DRB1,HLA-E | Generation of second messenger molecules:HLA-DQA1,HLA-DRA,HLA-DRB1 | Phosphorylation of CD3 and TCR zeta chains:HLA-DQA1,HLA-DRA,HLA-DRB1 | PD-1 signaling:HLA-DQA1,HLA-DRA,HLA-DRB1 | Interferon Signaling:HLA-B,HLA-C,HLA-DQA1,HLA-DRA,HLA-DRB1,HLA-E |…	Kawasaki disease:BAG6,HLA-B,HLA-C,HLA-DRB1,HLA-E,PRRC2A | lymphadenitis:BAG6,HLA-B,HLA-C,HLA-DRB1,HLA-E,PRRC2A | lymph node disease:BAG6,HLA-B,HLA-C,HLA-DRB1,HLA-E,PRRC2A | leprosy:HLA-DRB1,LTA,MICA | Graves' disease:HLA-B,HLA-C,HLA-DQA1,HLA-DRB1,TAP2 | sarcoidosis:DDR1,HLA-B,HLA-DQA1,HLA-DRB1,HSPA1L,LTA | hypersensitivity reaction type IV disease:DDR1,HLA-B,HLA-DQA1,HLA-DRB1,HSPA1L,LTA | hepatit…	antigen processing and presentation of exogenous peptide antigen:HLA-B,HLA-C,HLA-DOB,HLA-DQA1,HLA-DRA,HLA-DRB1,HLA-E,TAP2 | antigen processing and presentation of exogenous antigen:HLA-B,HLA-C,HLA-DOB,HLA-DQA1,HLA-DRA,HLA-DRB1,HLA-E,TAP2 | antigen processing and presentation of peptide antigen:HLA-B,HLA-C,HLA-DOB,HLA-DQA1,HLA-DRA,HLA-DRB1,HLA-E,TAP2 | adaptive immune response:HLA-B,HLA-C,HLA-DOB,…	OHP17_all	20.741	0.024876	0.0157873	0.0157873	3549	0.156612	0.0558431	2.29762	0	0.205194	0.0474833	4.80952	0	0.0776929	0.0992028	0.362985	0	0.491097	0.0516124	20.741	0	0.495183	0.0581119	16.8016	0	0.474411	0.0951527	6.21096	0.350976	0.0850258
rs368669046:31606678:A:C	6	31606678	6p21.33	C	A	0.983669	FALSE	rs145827824:32103749:C:G	0.597443	BAG6 (0.13 kb, near_gene/Downstream gene/MODIFIER); PRRC2A (1.1 kb, near_gene/Downstream gene/MODIFIER); APOM (14 kb); SNORA38 (16 kb); C6orf47 (19 kb); C6orf47-AS1 (19 kb); AIF1 (22 kb); GPANK1 (22 kb); CSNK2B (26 kb); UQCRHP1 (28 kb); LY6G5B (31 kb); LY6G5C (38 kb); NCR3 (46 kb); ABHD16A (48 kb); LST1 (50 kb)		0.799 Bioavailable testosterone levels // 0.744 Aspartate aminotransferase levels in low alcohol consumption // 0.52 Neurological blood protein biomarker levels // 0.488 Heel bone mineral density // 0.4 Blood protein levels	- | ABCF1 | ABHD16A | AGER | AIF1 | APOM | ATF6B | ATP6V1G2 | ATP6V1G2-DDX39B | BAG6 | BTNL2 | C2 | C4A | C4B | C4B_2 | C6orf10 | C6orf48 | CCHCR1 | CLIC1 | CSNK2B | DDAH2 | DDR1 | DDX39B | DOM3Z | DXO | EHMT2 | FLOT1 | GPANK1 | GPSM3 | GTF2H4 | HCG22 | HCG23 | HCG27 | HCG4B | HCG4P3 | HCP5 | HLA-A | HLA-B | HLA-C | HLA-DOA | HLA-DOB | HLA-DQA1 | HLA-DQA2 | HLA-DQB1 | HLA-DQB2 | HLA-DRA | HLA-DRB…	ABP1 | BTN3A2 | CCDC69 | HLA-DRB1 | HLA-DRB4 | HLA-DRB5 | HLA-F | HLA-H | HLA-V | IER3 | LIMS1 | NHP2 | PARP2 | TAP2 | TMEM154 | TRAV12-1 | ZNRD1	Systemic lupus erythematosus:HLA-DOB,HLA-DQA1,HLA-DRA,HLA-DRB1 | Antigen processing and presentation:HLA-C,HLA-DOB,HLA-DQA1,HLA-DRA,HLA-DRB1,HLA-E,HSPA1A,HSPA1B,HSPA1L,TAP2 | Allograft rejection:HLA-C,HLA-DOB,HLA-DQA1,HLA-DRA,HLA-DRB1,HLA-E | Type I diabetes mellitus:HLA-C,HLA-DOB,HLA-DQA1,HLA-DRA,HLA-DRB1,HLA-E,LTA | Graft-versus-host disease:HLA-C,HLA-DOB,HLA-DQA1,HLA-DRA,HLA-DRB1,HLA-E | Autoi…	Translocation of ZAP-70 to Immunological synapse:HLA-DQA1,HLA-DRA,HLA-DRB1 | Interferon gamma signaling:HLA-C,HLA-DQA1,HLA-DRA,HLA-DRB1,HLA-E | Generation of second messenger molecules:HLA-DQA1,HLA-DRA,HLA-DRB1 | Phosphorylation of CD3 and TCR zeta chains:HLA-DQA1,HLA-DRA,HLA-DRB1 | PD-1 signaling:HLA-DQA1,HLA-DRA,HLA-DRB1 | Interferon Signaling:HLA-C,HLA-DQA1,HLA-DRA,HLA-DRB1,HLA-E,PSMB8 | RNA P…	Kawasaki disease:ABHD16A,BAG6,HLA-C,HLA-DRB1,HLA-E,PRRC2A | lymphadenitis:ABHD16A,BAG6,HLA-C,HLA-DRB1,HLA-E,PRRC2A | lymph node disease:ABHD16A,BAG6,HLA-C,HLA-DRB1,HLA-E,PRRC2A | leprosy:HLA-DRB1,LTA | Graves' disease:HLA-C,HLA-DQA1,HLA-DRB1,TAP2 | sarcoidosis:DDR1,HLA-DQA1,HLA-DRB1,HSPA1L,LTA | hypersensitivity reaction type IV disease:DDR1,HLA-DQA1,HLA-DRB1,HSPA1L,LTA | hepatitis:APOM,HLA-C,HLA…	antigen processing and presentation of exogenous peptide antigen:HLA-C,HLA-DOB,HLA-DQA1,HLA-DRA,HLA-DRB1,HLA-E,PSMB8,TAP2 | antigen processing and presentation of exogenous antigen:HLA-C,HLA-DOB,HLA-DQA1,HLA-DRA,HLA-DRB1,HLA-E,PSMB8,TAP2 | antigen processing and presentation of peptide antigen:HLA-C,HLA-DOB,HLA-DQA1,HLA-DRA,HLA-DRB1,HLA-E,PSMB8,TAP2 | adaptive immune response:HLA-C,HLA-DOB,HLA-DQ…	OHP17_all	20.7344	0.0248679	0.0174484	0.0174484	3549	0.136574	0.0548907	1.89136	0.436205	0.197403	0.0454957	4.84412	0	0.0836719	0.100065	0.394635	0.0868931	0.469728	0.0493748	20.7344	0	0.476588	0.0557961	16.8782	0	0.450637	0.0902181	6.23182	0.508442	0.113717
rs141874749:31452134:C:A	6	31452134	6p21.33	A	C	0.995	FALSE	rs145827824:32103749:C:G	0.494832	HCP5 (6.8 kb); MICB (11 kb); PPIAP9 (35 kb); LINC01149 (37 kb); RPL15P4 (44 kb); MCCD1 (44 kb); ATP6V1G2-DDX39B (46 kb); DDX39B (46 kb)	0.8	0.662 Bioavailable testosterone levels // 0.616 Aspartate aminotransferase levels in low alcohol consumption // 0.616 Neurological blood protein biomarker levels // 0.606 Heel bone mineral density // 0.486 Blood protein levels	- | ABCF1 | ABHD16A | AGER | AIF1 | APOM | ATF6B | ATP6V1G2 | ATP6V1G2-DDX39B | BAG6 | C2 | C4A | C4B | C4B_2 | C6orf10 | C6orf48 | CCHCR1 | CLIC1 | CSNK2B | DDAH2 | DDR1 | DDX39B | DHX16 | DOM3Z | DXO | EHMT2 | FLOT1 | GPANK1 | GPSM3 | GTF2H4 | HCG22 | HCG23 | HCG27 | HCG4B | HCG4P3 | HCP5 | HLA-A | HLA-B | HLA-C | HLA-DOB | HLA-DQA1 | HLA-DQA2 | HLA-DQB1 | HLA-DQB2 | HLA-DRA | HLA-DRB1 | HLA-DR…	BTN3A2 | CDC42EP4 | HLA-A | HLA-DQA1 | HLA-DQA2 | HLA-DRB1 | HLA-DRB4 | HLA-DRB5 | HLA-F | HLA-H | HLA-V | IER3 | NHP2 | PARP2 | PSMB9 | TAP2 | TMEM154 | XRCC6 | ZNRD1	Systemic lupus erythematosus:HLA-DOB,HLA-DQA1,HLA-DRA,HLA-DRB1 | Antigen processing and presentation:HLA-C,HLA-DOB,HLA-DQA1,HLA-DRA,HLA-DRB1,HLA-E,HSPA1A,HSPA1B,HSPA1L,TAP2 | Allograft rejection:HLA-C,HLA-DOB,HLA-DQA1,HLA-DRA,HLA-DRB1,HLA-E | Type I diabetes mellitus:HLA-C,HLA-DOB,HLA-DQA1,HLA-DRA,HLA-DRB1,HLA-E,LTA | Graft-versus-host disease:HLA-C,HLA-DOB,HLA-DQA1,HLA-DRA,HLA-DRB1,HLA-E | Autoi…	Translocation of ZAP-70 to Immunological synapse:HLA-DQA1,HLA-DRA,HLA-DRB1 | Interferon gamma signaling:HLA-C,HLA-DQA1,HLA-DRA,HLA-DRB1,HLA-E | Generation of second messenger molecules:HLA-DQA1,HLA-DRA,HLA-DRB1 | Phosphorylation of CD3 and TCR zeta chains:HLA-DQA1,HLA-DRA,HLA-DRB1 | PD-1 signaling:HLA-DQA1,HLA-DRA,HLA-DRB1 | Interferon Signaling:HLA-C,HLA-DQA1,HLA-DRA,HLA-DRB1,HLA-E | RNA Polymer…	Kawasaki disease:BAG6,HLA-C,HLA-DRB1,HLA-E,PRRC2A | lymphadenitis:BAG6,HLA-C,HLA-DRB1,HLA-E,PRRC2A | lymph node disease:BAG6,HLA-C,HLA-DRB1,HLA-E,PRRC2A | leprosy:HLA-DRB1,LTA | Graves' disease:HLA-C,HLA-DQA1,HLA-DRB1,TAP2 | sarcoidosis:DDR1,HLA-DQA1,HLA-DRB1,HSPA1L,LTA | hypersensitivity reaction type IV disease:DDR1,HLA-DQA1,HLA-DRB1,HSPA1L,LTA | hepatitis:HLA-C,HLA-DQA1,HLA-DRB1,HLA-E,LTA,MICB…	antigen processing and presentation of exogenous peptide antigen:HLA-C,HLA-DOB,HLA-DQA1,HLA-DRA,HLA-DRB1,HLA-E,TAP2 | antigen processing and presentation of exogenous antigen:HLA-C,HLA-DOB,HLA-DQA1,HLA-DRA,HLA-DRB1,HLA-E,TAP2 | antigen processing and presentation of peptide antigen:HLA-C,HLA-DOB,HLA-DQA1,HLA-DRA,HLA-DRB1,HLA-E,TAP2 | adaptive immune response:HLA-C,HLA-DOB,HLA-DQA1,HLA-DRA,HLA-DRB…	OHP17_all	20.7172	0.024847	0.0162313	0.0162313	3549	0.140316	0.0559743	1.91425	0.0561672	0.19725	0.0471673	4.53903	0	0.0746011	0.0998142	0.342159	0	0.483953	0.050892	20.7172	0	0.468414	0.057846	15.2514	0	0.495642	0.0926597	7.05435	0	0.113953
6:32450276:T:A	6	32450276	6p21.32	A	T	0.979763	FALSE	rs145827824:32103749:C:G	0.520094	HLA-DRB9 (9 kb); HLA-DRB5 (35 kb); HLA-DRA (37 kb); RNU1-61P (67 kb)		0.404 Bioavailable testosterone levels	- | ABHD16A | AGER | AIF1 | APOM | ATF6B | ATP6V1G2 | B3GALT4 | BAG6 | BRD2 | C4A | C4B | C4B_2 | C6orf10 | C6orf25 | C6orf48 | CFB | CLIC1 | CSNK2B | CYP21A2 | DDAH2 | DDR1 | DXO | FLOT1 | GPANK1 | GPSM3 | HCG23 | HCG27 | HCP5 | HLA-C | HLA-DMA | HLA-DOA | HLA-DOB | HLA-DPA1 | HLA-DPB1 | HLA-DQA1 | HLA-DQA2 | HLA-DQB1 | HLA-DQB1-AS1 | HLA-DQB2 | HLA-DRA | HLA-DRB1 | HLA-DRB4 | HLA-DRB5 | HLA-DRB…	ABP1 | ARHGAP24 | BTN3A2 | CLK3 | DEF8 | EEF1G | EXOC1 | FLOT1 | GOLGA2 | HLA-C | HLA-G | HLA-H | IER3 | KPNA2 | LIMS1 | LINC00243 | MDC1 | ME2 | NCR3 | RPL34 | SSRP1 | TINF2 | TMEM154 | unnamed | VARS2 | XRCC6 | ZNF672 | ZNRD1	Systemic lupus erythematosus:C4A,C4B,HLA-DOB,HLA-DQA1,HLA-DQA2,HLA-DQB1,HLA-DRA,HLA-DRB1,HLA-DRB5 | Antigen processing and presentation:HLA-C,HLA-DOB,HLA-DQA1,HLA-DQA2,HLA-DQB1,HLA-DRA,HLA-DRB1,HLA-DRB5,HSPA1A,HSPA1B,HSPA1L,TAP2 | Allograft rejection:HLA-C,HLA-DOB,HLA-DQA1,HLA-DQA2,HLA-DQB1,HLA-DRA,HLA-DRB1,HLA-DRB5 | Type I diabetes mellitus:HLA-C,HLA-DOB,HLA-DQA1,HLA-DQA2,HLA-DQB1,HLA-DRA,HLA-D…	Translocation of ZAP-70 to Immunological synapse:HLA-DQA1,HLA-DQA2,HLA-DQB1,HLA-DQB2,HLA-DRA,HLA-DRB1,HLA-DRB5 | Interferon gamma signaling:HLA-C,HLA-DQA1,HLA-DQA2,HLA-DQB1,HLA-DQB2,HLA-DRA,HLA-DRB1,HLA-DRB5 | Generation of second messenger molecules:HLA-DQA1,HLA-DQA2,HLA-DQB1,HLA-DQB2,HLA-DRA,HLA-DRB1,HLA-DRB5 | Phosphorylation of CD3 and TCR zeta chains:HLA-DQA1,HLA-DQA2,HLA-DQB1,HLA-DQB2,HLA-D…	Kawasaki disease:BTNL2,HLA-C,HLA-DRB1,PRRC2A | lymphadenitis:BTNL2,HLA-C,HLA-DRB1,PRRC2A | lymph node disease:BTNL2,HLA-C,HLA-DRB1,PRRC2A | leprosy:BTNL2,HLA-DQB1,HLA-DRB1 | Graves' disease:HLA-C,HLA-DQA1,HLA-DQB1,HLA-DRB1,TAP2 | sarcoidosis:AGER,BTNL2,HLA-DQA1,HLA-DQB1,HLA-DRB1,HSPA1L | hypersensitivity reaction type IV disease:AGER,BTNL2,HLA-DQA1,HLA-DQB1,HLA-DRB1,HSPA1L | hepatitis:HLA-C,HLA-D…	antigen processing and presentation of exogenous peptide antigen:HLA-C,HLA-DOB,HLA-DQA1,HLA-DQA2,HLA-DQB1,HLA-DQB2,HLA-DRA,HLA-DRB1,HLA-DRB5,PSMB9,TAP2 | antigen processing and presentation of exogenous antigen:HLA-C,HLA-DOB,HLA-DQA1,HLA-DQA2,HLA-DQB1,HLA-DQB2,HLA-DRA,HLA-DRB1,HLA-DRB5,PSMB9,TAP2 | antigen processing and presentation of peptide antigen:HLA-C,HLA-DOB,HLA-DQA1,HLA-DQA2,HLA-DQB1,HLA…	OHP17_all	20.6904	0.0248142	0.010114	0.010114	3549	0.229601	0.070196	2.96971	0	0.212985	0.0566027	3.77466	0.279209	0.232374	0.131717	1.10958	0.07935	0.602773	0.06343	20.6904	0.723875	0.468523	0.0697949	10.7193	0	0.817285	0.121243	10.8055	0.67777	0.101217
rs201224323:31328935:TG:T	6	31328935	6p21.33	T	TG	0.991496	FALSE	rs145827824:32103749:C:G	0.422257	HLA-B (4 kb); DHFRP2 (5.2 kb); RNU6-283P (9 kb); FGFR3P1 (16 kb); ZDHHC20P2 (19 kb); HLA-S (21 kb); HCP5 (40 kb); MICA (42 kb)	2.073	0.645 Heel bone mineral density // 0.595 Bioavailable testosterone levels // 0.585 Neurological blood protein biomarker levels // 0.554 Aspartate aminotransferase levels in low alcohol consumption // 0.517 Blood protein levels	- | ABCF1 | ABHD16A | AGER | AIF1 | APOM | ATF6B | ATP6V1G2 | ATP6V1G2-DDX39B | BAG6 | C2 | C4A | C4B | C4B_2 | C6orf10 | C6orf48 | CCHCR1 | CLIC1 | CSNK2B | DDAH2 | DDR1 | DDX39B | DHX16 | DOM3Z | DXO | EHMT2 | FLOT1 | GPANK1 | GPSM3 | GTF2H4 | HCG22 | HCG23 | HCG27 | HCG4B | HCG4P3 | HCP5 | HLA-A | HLA-B | HLA-C | HLA-DOB | HLA-DQA1 | HLA-DQA2 | HLA-DQB1 | HLA-DQB2 | HLA-DRA | HLA-DRB1 | HLA-DR…	BTN3A2 | C6orf10 | CDC42EP4 | HLA-A | HLA-DQA1 | HLA-DQA2 | HLA-DRB1 | HLA-DRB4 | HLA-DRB5 | HLA-F | HLA-H | HLA-V | IER3 | NHP2 | PARP2 | TAP2 | TMEM154 | XRCC6 | ZNRD1	Systemic lupus erythematosus:HLA-DOB,HLA-DQA1,HLA-DRA,HLA-DRB1 | Antigen processing and presentation:HLA-B,HLA-C,HLA-DOB,HLA-DQA1,HLA-DRA,HLA-DRB1,HLA-E,HSPA1A,HSPA1B,HSPA1L,TAP2 | Allograft rejection:HLA-B,HLA-C,HLA-DOB,HLA-DQA1,HLA-DRA,HLA-DRB1,HLA-E | Type I diabetes mellitus:HLA-B,HLA-C,HLA-DOB,HLA-DQA1,HLA-DRA,HLA-DRB1,HLA-E,LTA | Graft-versus-host disease:HLA-B,HLA-C,HLA-DOB,HLA-DQA1,HLA-DR…	Translocation of ZAP-70 to Immunological synapse:HLA-DQA1,HLA-DRA,HLA-DRB1 | Interferon gamma signaling:HLA-B,HLA-C,HLA-DQA1,HLA-DRA,HLA-DRB1,HLA-E | Generation of second messenger molecules:HLA-DQA1,HLA-DRA,HLA-DRB1 | Phosphorylation of CD3 and TCR zeta chains:HLA-DQA1,HLA-DRA,HLA-DRB1 | PD-1 signaling:HLA-DQA1,HLA-DRA,HLA-DRB1 | Interferon Signaling:HLA-B,HLA-C,HLA-DQA1,HLA-DRA,HLA-DRB1,HLA-E |…	Kawasaki disease:BAG6,HLA-B,HLA-C,HLA-DRB1,HLA-E,PRRC2A | lymphadenitis:BAG6,HLA-B,HLA-C,HLA-DRB1,HLA-E,PRRC2A | lymph node disease:BAG6,HLA-B,HLA-C,HLA-DRB1,HLA-E,PRRC2A | leprosy:HLA-DRB1,LTA,MICA | Graves' disease:HLA-B,HLA-C,HLA-DQA1,HLA-DRB1,TAP2 | sarcoidosis:DDR1,HLA-B,HLA-DQA1,HLA-DRB1,HSPA1L,LTA | hypersensitivity reaction type IV disease:DDR1,HLA-B,HLA-DQA1,HLA-DRB1,HSPA1L,LTA | hepatit…	antigen processing and presentation of exogenous peptide antigen:HLA-B,HLA-C,HLA-DOB,HLA-DQA1,HLA-DRA,HLA-DRB1,HLA-E,TAP2 | antigen processing and presentation of exogenous antigen:HLA-B,HLA-C,HLA-DOB,HLA-DQA1,HLA-DRA,HLA-DRB1,HLA-E,TAP2 | antigen processing and presentation of peptide antigen:HLA-B,HLA-C,HLA-DOB,HLA-DQA1,HLA-DRA,HLA-DRB1,HLA-E,TAP2 | adaptive immune response:HLA-B,HLA-C,HLA-DOB,…	OHP17_all	20.6558	0.024772	0.0158456	0.0158456	3549	0.158202	0.0559272	2.33036	0	0.200186	0.0472273	4.64831	0	0.0882631	0.100348	0.421255	0	0.489049	0.0515077	20.6558	0	0.491717	0.0578353	16.7297	0	0.474404	0.0953414	6.18865	0.35281	0.0847708
rs114469043:31588865:A:G	6	31588865	6p21.33	G	A	0.985087	FALSE	rs145827824:32103749:C:G	0.641701	PRRC2A (0 kb, intron/Intron/MODIFIER | nc-RNA/Non coding transcript/MODIFIER | near_gene/Upstream gene/MODIFIER); SNORA38 (2 kb, near_gene/Upstream gene/MODIFIER); AIF1 (4.1 kb, near_gene/Downstream gene/MODIFIER); UQCRHP1 (9.7 kb); BAG6 (18 kb); NCR3 (28 kb); APOM (31 kb); LST1 (32 kb); C6orf47 (37 kb); C6orf47-AS1 (37 kb); LTB (39 kb); GPANK1 (40 kb); TNF (43 kb); CSNK2B (44 kb); LTA (47 kb); L…	6.978	0.858 Bioavailable testosterone levels // 0.799 Aspartate aminotransferase levels in low alcohol consumption // 0.488 Neurological blood protein biomarker levels // 0.45 Heel bone mineral density // 0.373 Blood protein levels // 0.303 Ocular sarcoidosis	- | ABCF1 | ABHD16A | AGER | AIF1 | APOM | ATF6B | ATP6V1G2 | ATP6V1G2-DDX39B | BAG6 | BAT4 | BTNL2 | C2 | C4A | C4B | C4B_2 | C6orf10 | C6orf25 | C6orf48 | CCHCR1 | CFB | CLIC1 | CSNK2B | CUTA | DDAH2 | DDR1 | DDX39B | DHX16 | DOM3Z | DXO | EHMT2 | FLOT1 | GPANK1 | GPSM3 | GTF2H4 | HCG22 | HCG23 | HCG27 | HCG4B | HCG4P3 | HCP5 | HLA-A | HLA-B | HLA-C | HLA-DOA | HLA-DOB | HLA-DPA1 | HLA-DQA1 | H…	ABP1 | BTN3A2 | CCDC69 | EXOC1 | HLA-DRB1 | HLA-DRB4 | HLA-DRB5 | HLA-F | HLA-G | HLA-H | HLA-V | IER3 | LIMS1 | MDC1 | NHP2 | PARP2 | PSMB9 | SSRP1 | TAP2 | TMEM154 | TRAV12-1 | TUBB | ZAP70 | ZNF672 | ZNRD1	Systemic lupus erythematosus:HLA-DOB,HLA-DQA1,HLA-DRA,HLA-DRB1,TNF | Antigen processing and presentation:HLA-C,HLA-DOB,HLA-DQA1,HLA-DRA,HLA-DRB1,HLA-E,HSPA1A,HSPA1B,HSPA1L,TAP2,TNF | Allograft rejection:HLA-C,HLA-DOB,HLA-DQA1,HLA-DRA,HLA-DRB1,HLA-E,TNF | Type I diabetes mellitus:HLA-C,HLA-DOB,HLA-DQA1,HLA-DRA,HLA-DRB1,HLA-E,LTA,TNF | Graft-versus-host disease:HLA-C,HLA-DOB,HLA-DQA1,HLA-DRA,HLA-DR…	Translocation of ZAP-70 to Immunological synapse:HLA-DQA1,HLA-DRA,HLA-DRB1 | Interferon gamma signaling:HLA-C,HLA-DQA1,HLA-DRA,HLA-DRB1,HLA-E | Generation of second messenger molecules:HLA-DQA1,HLA-DRA,HLA-DRB1 | Phosphorylation of CD3 and TCR zeta chains:HLA-DQA1,HLA-DRA,HLA-DRB1 | PD-1 signaling:HLA-DQA1,HLA-DRA,HLA-DRB1 | Interferon Signaling:HLA-C,HLA-DQA1,HLA-DRA,HLA-DRB1,HLA-E,PSMB8 | RNA P…	Kawasaki disease:ABHD16A,BAG6,HLA-C,HLA-DRB1,HLA-E,PRRC2A,TNF | lymphadenitis:ABHD16A,BAG6,HLA-C,HLA-DRB1,HLA-E,PRRC2A,TNF | lymph node disease:ABHD16A,BAG6,HLA-C,HLA-DRB1,HLA-E,PRRC2A,TNF | leprosy:HLA-DRB1,LTA,TNF | Graves' disease:HLA-C,HLA-DQA1,HLA-DRB1,TAP2,TNF | sarcoidosis:DDR1,HLA-DQA1,HLA-DRB1,HSPA1L,LTA,TNF | hypersensitivity reaction type IV disease:DDR1,HLA-DQA1,HLA-DRB1,HSPA1L,LTA,TN…	antigen processing and presentation of exogenous peptide antigen:HLA-C,HLA-DOB,HLA-DQA1,HLA-DRA,HLA-DRB1,HLA-E,PSMB8,TAP2 | antigen processing and presentation of exogenous antigen:HLA-C,HLA-DOB,HLA-DQA1,HLA-DRA,HLA-DRB1,HLA-E,PSMB8,TAP2 | antigen processing and presentation of peptide antigen:HLA-C,HLA-DOB,HLA-DQA1,HLA-DRA,HLA-DRB1,HLA-E,PSMB8,TAP2 | adaptive immune response:HLA-C,HLA-DOB,HLA-DQ…	OHP17_all	20.6369	0.0247488	0.0174431	0.0174431	3549	0.139425	0.0550277	1.94748	0.474169	0.197653	0.045544	4.84587	0	0.087636	0.100565	0.416218	0.165853	0.468894	0.0494086	20.6369	0	0.474516	0.0558653	16.6995	0	0.451637	0.0902138	6.25731	0.503225	0.112275
rs144193713:31580867:C:T	6	31580867	6p21.33	T	C	0.984087	FALSE	rs145827824:32103749:C:G	0.641701	UQCRHP1 (1.7 kb, near_gene/Upstream gene/MODIFIER); AIF1 (2.1 kb, near_gene/Upstream gene/MODIFIER); PRRC2A (7.6 kb); SNORA38 (10 kb); NCR3 (20 kb); LST1 (24 kb); BAG6 (26 kb); LTB (31 kb); TNF (35 kb); LTA (39 kb); APOM (39 kb); C6orf47 (45 kb); C6orf47-AS1 (45 kb); GPANK1 (48 kb)	7.031	0.858 Bioavailable testosterone levels // 0.799 Aspartate aminotransferase levels in low alcohol consumption // 0.488 Neurological blood protein biomarker levels // 0.45 Heel bone mineral density // 0.373 Blood protein levels // 0.303 Ocular sarcoidosis	- | ABCF1 | ABHD16A | AGER | AIF1 | APOM | ATF6B | ATP6V1G2 | ATP6V1G2-DDX39B | BAG6 | BTNL2 | C2 | C4A | C4B | C4B_2 | C6orf10 | C6orf48 | CCHCR1 | CLIC1 | CSNK2B | CUTA | DDAH2 | DDR1 | DDX39B | DHX16 | DOM3Z | DXO | EHMT2 | FLOT1 | GPANK1 | GPSM3 | GTF2H4 | HCG22 | HCG23 | HCG27 | HCG4B | HCG4P3 | HCP5 | HLA-A | HLA-B | HLA-C | HLA-DOA | HLA-DOB | HLA-DPA1 | HLA-DQA1 | HLA-DQA2 | HLA-DQB1 | HL…	ABP1 | BTN3A2 | CCDC69 | EXOC1 | HLA-DRB1 | HLA-DRB4 | HLA-DRB5 | HLA-F | HLA-G | HLA-H | HLA-V | IER3 | LIMS1 | MDC1 | NHP2 | PARP2 | PSMB9 | SSRP1 | TAP2 | TMEM154 | TRAV12-1 | ZAP70 | ZNF672 | ZNRD1	Systemic lupus erythematosus:HLA-DOB,HLA-DQA1,HLA-DRA,HLA-DRB1,TNF | Antigen processing and presentation:HLA-C,HLA-DOB,HLA-DQA1,HLA-DRA,HLA-DRB1,HLA-E,HSPA1A,HSPA1B,HSPA1L,TAP2,TNF | Allograft rejection:HLA-C,HLA-DOB,HLA-DQA1,HLA-DRA,HLA-DRB1,HLA-E,TNF | Type I diabetes mellitus:HLA-C,HLA-DOB,HLA-DQA1,HLA-DRA,HLA-DRB1,HLA-E,LTA,TNF | Graft-versus-host disease:HLA-C,HLA-DOB,HLA-DQA1,HLA-DRA,HLA-DR…	Translocation of ZAP-70 to Immunological synapse:HLA-DQA1,HLA-DRA,HLA-DRB1 | Interferon gamma signaling:HLA-C,HLA-DQA1,HLA-DRA,HLA-DRB1,HLA-E | Generation of second messenger molecules:HLA-DQA1,HLA-DRA,HLA-DRB1 | Phosphorylation of CD3 and TCR zeta chains:HLA-DQA1,HLA-DRA,HLA-DRB1 | PD-1 signaling:HLA-DQA1,HLA-DRA,HLA-DRB1 | Interferon Signaling:HLA-C,HLA-DQA1,HLA-DRA,HLA-DRB1,HLA-E,PSMB8 | RNA P…	Kawasaki disease:ABHD16A,BAG6,HLA-C,HLA-DRB1,HLA-E,PRRC2A,TNF | lymphadenitis:ABHD16A,BAG6,HLA-C,HLA-DRB1,HLA-E,PRRC2A,TNF | lymph node disease:ABHD16A,BAG6,HLA-C,HLA-DRB1,HLA-E,PRRC2A,TNF | leprosy:HLA-DRB1,LTA,TNF | Graves' disease:HLA-C,HLA-DQA1,HLA-DRB1,TAP2,TNF | sarcoidosis:DDR1,HLA-DQA1,HLA-DRB1,HSPA1L,LTA,TNF | hypersensitivity reaction type IV disease:DDR1,HLA-DQA1,HLA-DRB1,HSPA1L,LTA,TN…	antigen processing and presentation of exogenous peptide antigen:HLA-C,HLA-DOB,HLA-DQA1,HLA-DRA,HLA-DRB1,HLA-E,PSMB8,TAP2 | antigen processing and presentation of exogenous antigen:HLA-C,HLA-DOB,HLA-DQA1,HLA-DRA,HLA-DRB1,HLA-E,PSMB8,TAP2 | antigen processing and presentation of peptide antigen:HLA-C,HLA-DOB,HLA-DQA1,HLA-DRA,HLA-DRB1,HLA-E,PSMB8,TAP2 | adaptive immune response:HLA-C,HLA-DOB,HLA-DQ…	OHP17_all	20.6365	0.0247483	0.0174435	0.0174435	3549	0.139576	0.0550492	1.94965	0.472527	0.197787	0.0455687	4.84708	0	0.0875678	0.100602	0.415599	0.164838	0.469158	0.049437	20.6365	0	0.474641	0.0558963	16.6902	0	0.452141	0.0902693	6.26298	0.500623	0.112145
rs115313300:31737416:G:A	6	31737416	6p21.33	A	G	0.994	FALSE	rs145827824:32103749:C:G	0.524549	VWA7 (0 kb, intron/Intron/MODIFIER | nc-RNA/Non coding transcript/MODIFIER | near_gene/Upstream gene/MODIFIER | near_gene/Downstream gene/MODIFIER); SAPCD1-AS1 (4.1 kb, near_gene/Upstream gene/MODIFIER); MSH5-SAPCD1 (4.8 kb, near_gene/Downstream gene/MODIFIER); SAPCD1 (4.8 kb, near_gene/Downstream gene/MODIFIER); MSH5 (4.8 kb, near_gene/Downstream gene/MODIFIER); VARS (7.9 kb); RNU6-850P (13 kb);…	6.392	0.702 Bioavailable testosterone levels // 0.653 Aspartate aminotransferase levels in low alcohol consumption // 0.342 Neurological blood protein biomarker levels // 0.307 Heel bone mineral density	- | ABCF1 | ABHD16A | AGER | AIF1 | ATF6B | ATP6V1G2 | ATP6V1G2-DDX39B | BAG6 | C2 | C4A | C4B | C4B_2 | C6orf10 | C6orf25 | C6orf48 | CCHCR1 | CFB | CLIC1 | CSNK2B | DDAH2 | DDR1 | DDX39B | DHX16 | DOM3Z | DXO | EHMT2 | FLOT1 | GPANK1 | GPSM3 | GTF2H4 | HCG22 | HCG23 | HCG27 | HCG4B | HCG4P3 | HCP5 | HLA-A | HLA-B | HLA-C | HLA-DMB | HLA-DOA | HLA-DOB | HLA-DQA1 | HLA-DQA2 | HLA-DQB1 | HLA-DRA |…	ABP1 | BTN3A2 | GABBR1 | HLA-DQA1 | HLA-DRB1 | HLA-DRB4 | HLA-DRB5 | HLA-F | HLA-H | HLA-V | IER3 | LIMS1 | NHP2 | TAP2 | TMEM154 | ZNRD1	Systemic lupus erythematosus:HLA-DOB,HLA-DQA1,HLA-DRA,HLA-DRB1 | Antigen processing and presentation:HLA-C,HLA-DOB,HLA-DQA1,HLA-DRA,HLA-DRB1,HLA-E,HSPA1A,HSPA1B,HSPA1L,TAP2 | Allograft rejection:HLA-C,HLA-DOB,HLA-DQA1,HLA-DRA,HLA-DRB1,HLA-E | Type I diabetes mellitus:HLA-C,HLA-DOB,HLA-DQA1,HLA-DRA,HLA-DRB1,HLA-E,LTA | Graft-versus-host disease:HLA-C,HLA-DOB,HLA-DQA1,HLA-DRA,HLA-DRB1,HLA-E | Autoi…	Translocation of ZAP-70 to Immunological synapse:HLA-DQA1,HLA-DRA,HLA-DRB1 | Interferon gamma signaling:HLA-C,HLA-DQA1,HLA-DRA,HLA-DRB1,HLA-E | Generation of second messenger molecules:HLA-DQA1,HLA-DRA,HLA-DRB1 | Phosphorylation of CD3 and TCR zeta chains:HLA-DQA1,HLA-DRA,HLA-DRB1 | PD-1 signaling:HLA-DQA1,HLA-DRA,HLA-DRB1 | Interferon Signaling:HLA-C,HLA-DQA1,HLA-DRA,HLA-DRB1,HLA-E,PSMB8 | RNA P…	Kawasaki disease:ABHD16A,BAG6,HLA-C,HLA-DRB1,HLA-E,PRRC2A | lymphadenitis:ABHD16A,BAG6,HLA-C,HLA-DRB1,HLA-E,PRRC2A | lymph node disease:ABHD16A,BAG6,HLA-C,HLA-DRB1,HLA-E,PRRC2A | leprosy:HLA-DRB1,LTA | Graves' disease:HLA-C,HLA-DQA1,HLA-DRB1,TAP2 | sarcoidosis:DDR1,HLA-DQA1,HLA-DRB1,HSPA1L,LTA | hypersensitivity reaction type IV disease:DDR1,HLA-DQA1,HLA-DRB1,HSPA1L,LTA | hepatitis:HLA-C,HLA-DQA1…	antigen processing and presentation of exogenous peptide antigen:HLA-C,HLA-DOB,HLA-DQA1,HLA-DRA,HLA-DRB1,HLA-E,PSMB8,TAP2 | antigen processing and presentation of exogenous antigen:HLA-C,HLA-DOB,HLA-DQA1,HLA-DRA,HLA-DRB1,HLA-E,PSMB8,TAP2 | antigen processing and presentation of peptide antigen:HLA-C,HLA-DOB,HLA-DQA1,HLA-DRA,HLA-DRB1,HLA-E,PSMB8,TAP2 | adaptive immune response:HLA-C,HLA-DOB,HLA-DQ…	OHP17_all	20.5655	0.0246618	0.0182749	0.0182749	3549	0.110022	0.053301	1.40891	0.424436	0.154037	0.044313	3.2935	0.491434	0.0747785	0.0971568	0.355073	0	0.456813	0.0482226	20.5655	0	0.429363	0.0544135	14.5223	0	0.487716	0.088512	7.44682	0.194465	0.100408
rs28745893:31709580:G:C	6	31709580	6p21.33	C	G	0.998417	FALSE	rs145827824:32103749:C:G	0.524549	MSH5 (0 kb, intron/NMD transcript/MODIFIER | intron/Intron/MODIFIER | nc-RNA/Non coding transcript/MODIFIER | near_gene/Upstream gene/MODIFIER); MSH5-SAPCD1 (0 kb, intron/NMD transcript/MODIFIER | intron/Intron/MODIFIER); CLIC1 (2 kb, near_gene/Upstream gene/MODIFIER); DDAH2 (11 kb); C6orf25 (15 kb); RNU6-850P (15 kb); LY6G6C (20 kb); SAPCD1 (21 kb); SAPCD1-AS1 (23 kb); VWA7 (24 kb); LY6G6F (24 k…	1.182	0.702 Bioavailable testosterone levels // 0.653 Aspartate aminotransferase levels in low alcohol consumption // 0.342 Neurological blood protein biomarker levels // 0.307 Heel bone mineral density	- | ABCF1 | ABHD16A | AGER | AIF1 | ATF6B | ATP6V1G2 | ATP6V1G2-DDX39B | BAG6 | C2 | C4A | C4B | C4B_2 | C6orf10 | C6orf25 | C6orf48 | CCHCR1 | CFB | CLIC1 | CSNK2B | DDAH2 | DDR1 | DDX39B | DHX16 | DOM3Z | DXO | EHMT2 | FLOT1 | GPANK1 | GPSM3 | GTF2H4 | HCG22 | HCG23 | HCG27 | HCG4B | HCG4P3 | HCP5 | HLA-A | HLA-B | HLA-C | HLA-DMB | HLA-DOA | HLA-DOB | HLA-DQA1 | HLA-DQA2 | HLA-DQB1 | HLA-DRA |…	ABP1 | BTN3A2 | GABBR1 | HLA-DQA1 | HLA-DRB1 | HLA-DRB4 | HLA-DRB5 | HLA-F | HLA-H | HLA-V | IER3 | LIMS1 | NHP2 | TAP2 | TMEM154 | ZNRD1	Systemic lupus erythematosus:HLA-DOB,HLA-DQA1,HLA-DRA,HLA-DRB1 | Antigen processing and presentation:HLA-C,HLA-DOB,HLA-DQA1,HLA-DRA,HLA-DRB1,HLA-E,HSPA1A,HSPA1B,HSPA1L,TAP2 | Allograft rejection:HLA-C,HLA-DOB,HLA-DQA1,HLA-DRA,HLA-DRB1,HLA-E | Type I diabetes mellitus:HLA-C,HLA-DOB,HLA-DQA1,HLA-DRA,HLA-DRB1,HLA-E,LTA | Graft-versus-host disease:HLA-C,HLA-DOB,HLA-DQA1,HLA-DRA,HLA-DRB1,HLA-E | Autoi…	Translocation of ZAP-70 to Immunological synapse:HLA-DQA1,HLA-DRA,HLA-DRB1 | Interferon gamma signaling:HLA-C,HLA-DQA1,HLA-DRA,HLA-DRB1,HLA-E | Generation of second messenger molecules:HLA-DQA1,HLA-DRA,HLA-DRB1 | Phosphorylation of CD3 and TCR zeta chains:HLA-DQA1,HLA-DRA,HLA-DRB1 | PD-1 signaling:HLA-DQA1,HLA-DRA,HLA-DRB1 | Interferon Signaling:HLA-C,HLA-DQA1,HLA-DRA,HLA-DRB1,HLA-E,PSMB8 | RNA P…	Kawasaki disease:ABHD16A,BAG6,HLA-C,HLA-DRB1,HLA-E,PRRC2A | lymphadenitis:ABHD16A,BAG6,HLA-C,HLA-DRB1,HLA-E,PRRC2A | lymph node disease:ABHD16A,BAG6,HLA-C,HLA-DRB1,HLA-E,PRRC2A | leprosy:HLA-DRB1,LTA | Graves' disease:HLA-C,HLA-DQA1,HLA-DRB1,TAP2 | sarcoidosis:DDR1,HLA-DQA1,HLA-DRB1,HSPA1L,LTA | hypersensitivity reaction type IV disease:DDR1,HLA-DQA1,HLA-DRB1,HSPA1L,LTA | hepatitis:HLA-C,HLA-DQA1…	antigen processing and presentation of exogenous peptide antigen:HLA-C,HLA-DOB,HLA-DQA1,HLA-DRA,HLA-DRB1,HLA-E,PSMB8,TAP2 | antigen processing and presentation of exogenous antigen:HLA-C,HLA-DOB,HLA-DQA1,HLA-DRA,HLA-DRB1,HLA-E,PSMB8,TAP2 | antigen processing and presentation of peptide antigen:HLA-C,HLA-DOB,HLA-DQA1,HLA-DRA,HLA-DRB1,HLA-E,PSMB8,TAP2 | adaptive immune response:HLA-C,HLA-DOB,HLA-DQ…	OHP17_all	20.5643	0.0246602	0.0183077	0.0183077	3549	0.109896	0.0531863	1.41112	0.424288	0.153594	0.0442229	3.28873	0.49772	0.0750858	0.0970129	0.357591	0	0.455714	0.0481082	20.5643	0	0.429015	0.0543141	14.5503	0	0.485209	0.0882285	7.42044	0.229815	0.0994162
rs114263207:31736658:G:C	6	31736658	6p21.33	C	G	0.994417	FALSE	rs145827824:32103749:C:G	0.524549	VWA7 (0 kb, intron/Intron/MODIFIER | nc-RNA/Non coding transcript/MODIFIER | near_gene/Upstream gene/MODIFIER | near_gene/Downstream gene/MODIFIER); SAPCD1-AS1 (3.3 kb, near_gene/Upstream gene/MODIFIER); MSH5-SAPCD1 (4 kb, near_gene/Downstream gene/MODIFIER); SAPCD1 (4 kb, near_gene/Downstream gene/MODIFIER); MSH5 (4 kb, near_gene/Downstream gene/MODIFIER); VARS (8.6 kb); RNU6-850P (12 kb); LSM2 …	1.638	0.702 Bioavailable testosterone levels // 0.653 Aspartate aminotransferase levels in low alcohol consumption // 0.342 Neurological blood protein biomarker levels // 0.307 Heel bone mineral density	- | ABCF1 | ABHD16A | AGER | AIF1 | ATF6B | ATP6V1G2 | ATP6V1G2-DDX39B | BAG6 | C2 | C4A | C4B | C4B_2 | C6orf10 | C6orf25 | C6orf48 | CCHCR1 | CFB | CLIC1 | CSNK2B | DDAH2 | DDR1 | DDX39B | DHX16 | DOM3Z | DXO | EHMT2 | FLOT1 | GPANK1 | GPSM3 | GTF2H4 | HCG22 | HCG23 | HCG27 | HCG4B | HCG4P3 | HCP5 | HLA-A | HLA-B | HLA-C | HLA-DMB | HLA-DOA | HLA-DOB | HLA-DQA1 | HLA-DQA2 | HLA-DQB1 | HLA-DRA |…	ABP1 | BTN3A2 | GABBR1 | HLA-DQA1 | HLA-DRB1 | HLA-DRB4 | HLA-DRB5 | HLA-F | HLA-H | HLA-V | IER3 | LIMS1 | NHP2 | TAP2 | TMEM154 | ZNRD1	Systemic lupus erythematosus:HLA-DOB,HLA-DQA1,HLA-DRA,HLA-DRB1 | Antigen processing and presentation:HLA-C,HLA-DOB,HLA-DQA1,HLA-DRA,HLA-DRB1,HLA-E,HSPA1A,HSPA1B,HSPA1L,TAP2 | Allograft rejection:HLA-C,HLA-DOB,HLA-DQA1,HLA-DRA,HLA-DRB1,HLA-E | Type I diabetes mellitus:HLA-C,HLA-DOB,HLA-DQA1,HLA-DRA,HLA-DRB1,HLA-E,LTA | Graft-versus-host disease:HLA-C,HLA-DOB,HLA-DQA1,HLA-DRA,HLA-DRB1,HLA-E | Autoi…	Translocation of ZAP-70 to Immunological synapse:HLA-DQA1,HLA-DRA,HLA-DRB1 | Interferon gamma signaling:HLA-C,HLA-DQA1,HLA-DRA,HLA-DRB1,HLA-E | Generation of second messenger molecules:HLA-DQA1,HLA-DRA,HLA-DRB1 | Phosphorylation of CD3 and TCR zeta chains:HLA-DQA1,HLA-DRA,HLA-DRB1 | PD-1 signaling:HLA-DQA1,HLA-DRA,HLA-DRB1 | Interferon Signaling:HLA-C,HLA-DQA1,HLA-DRA,HLA-DRB1,HLA-E,PSMB8 | RNA P…	Kawasaki disease:ABHD16A,BAG6,HLA-C,HLA-DRB1,HLA-E,PRRC2A | lymphadenitis:ABHD16A,BAG6,HLA-C,HLA-DRB1,HLA-E,PRRC2A | lymph node disease:ABHD16A,BAG6,HLA-C,HLA-DRB1,HLA-E,PRRC2A | leprosy:HLA-DRB1,LTA | Graves' disease:HLA-C,HLA-DQA1,HLA-DRB1,TAP2 | sarcoidosis:DDR1,HLA-DQA1,HLA-DRB1,HSPA1L,LTA | hypersensitivity reaction type IV disease:DDR1,HLA-DQA1,HLA-DRB1,HSPA1L,LTA | hepatitis:HLA-C,HLA-DQA1…	antigen processing and presentation of exogenous peptide antigen:HLA-C,HLA-DOB,HLA-DQA1,HLA-DRA,HLA-DRB1,HLA-E,PSMB8,TAP2 | antigen processing and presentation of exogenous antigen:HLA-C,HLA-DOB,HLA-DQA1,HLA-DRA,HLA-DRB1,HLA-E,PSMB8,TAP2 | antigen processing and presentation of peptide antigen:HLA-C,HLA-DOB,HLA-DQA1,HLA-DRA,HLA-DRB1,HLA-E,PSMB8,TAP2 | adaptive immune response:HLA-C,HLA-DOB,HLA-DQ…	OHP17_all	20.5623	0.0246578	0.0182771	0.0182771	3549	0.11002	0.0532966	1.40905	0.424326	0.154023	0.0443103	3.29335	0.491507	0.0747965	0.0971475	0.355224	0	0.456722	0.048217	20.5623	0	0.429314	0.0544105	14.5207	0	0.48754	0.0884933	7.44479	0.19706	0.100326
rs28399999:31733858:C:A	6	31733858	6p21.33	A	C	0.995417	FALSE	rs145827824:32103749:C:G	0.524549	VWA7 (0 kb, intron/Intron/MODIFIER | nc-RNA/Non coding transcript/MODIFIER | near_gene/Downstream gene/MODIFIER); SAPCD1-AS1 (0.49 kb, near_gene/Upstream gene/MODIFIER); MSH5-SAPCD1 (1.2 kb, near_gene/Downstream gene/MODIFIER); SAPCD1 (1.2 kb, near_gene/Downstream gene/MODIFIER); MSH5 (1.2 kb, near_gene/Downstream gene/MODIFIER); RNU6-850P (9 kb); VARS (11 kb); CLIC1 (26 kb); LSM2 (31 kb); DDAH2 …	6.358	0.702 Bioavailable testosterone levels // 0.653 Aspartate aminotransferase levels in low alcohol consumption // 0.342 Neurological blood protein biomarker levels // 0.307 Heel bone mineral density	- | ABCF1 | ABHD16A | AGER | AIF1 | ATF6B | ATP6V1G2 | ATP6V1G2-DDX39B | BAG6 | C2 | C4A | C4B | C4B_2 | C6orf10 | C6orf25 | C6orf48 | CCHCR1 | CFB | CLIC1 | CSNK2B | DDAH2 | DDR1 | DDX39B | DHX16 | DOM3Z | DXO | EHMT2 | FLOT1 | GPANK1 | GPSM3 | GTF2H4 | HCG22 | HCG23 | HCG27 | HCG4B | HCG4P3 | HCP5 | HLA-A | HLA-B | HLA-C | HLA-DMB | HLA-DOA | HLA-DOB | HLA-DQA1 | HLA-DQA2 | HLA-DQB1 | HLA-DRA |…	ABP1 | BTN3A2 | GABBR1 | HLA-DQA1 | HLA-DRB1 | HLA-DRB4 | HLA-DRB5 | HLA-F | HLA-H | HLA-V | IER3 | LIMS1 | NHP2 | TAP2 | TMEM154 | ZNRD1	Systemic lupus erythematosus:HLA-DOB,HLA-DQA1,HLA-DRA,HLA-DRB1 | Antigen processing and presentation:HLA-C,HLA-DOB,HLA-DQA1,HLA-DRA,HLA-DRB1,HLA-E,HSPA1A,HSPA1B,HSPA1L,TAP2 | Allograft rejection:HLA-C,HLA-DOB,HLA-DQA1,HLA-DRA,HLA-DRB1,HLA-E | Type I diabetes mellitus:HLA-C,HLA-DOB,HLA-DQA1,HLA-DRA,HLA-DRB1,HLA-E,LTA | Graft-versus-host disease:HLA-C,HLA-DOB,HLA-DQA1,HLA-DRA,HLA-DRB1,HLA-E | Autoi…	Translocation of ZAP-70 to Immunological synapse:HLA-DQA1,HLA-DRA,HLA-DRB1 | Interferon gamma signaling:HLA-C,HLA-DQA1,HLA-DRA,HLA-DRB1,HLA-E | Generation of second messenger molecules:HLA-DQA1,HLA-DRA,HLA-DRB1 | Phosphorylation of CD3 and TCR zeta chains:HLA-DQA1,HLA-DRA,HLA-DRB1 | PD-1 signaling:HLA-DQA1,HLA-DRA,HLA-DRB1 | Interferon Signaling:HLA-C,HLA-DQA1,HLA-DRA,HLA-DRB1,HLA-E,PSMB8 | RNA P…	Kawasaki disease:ABHD16A,BAG6,HLA-C,HLA-DRB1,HLA-E,PRRC2A | lymphadenitis:ABHD16A,BAG6,HLA-C,HLA-DRB1,HLA-E,PRRC2A | lymph node disease:ABHD16A,BAG6,HLA-C,HLA-DRB1,HLA-E,PRRC2A | leprosy:HLA-DRB1,LTA | Graves' disease:HLA-C,HLA-DQA1,HLA-DRB1,TAP2 | sarcoidosis:DDR1,HLA-DQA1,HLA-DRB1,HSPA1L,LTA | hypersensitivity reaction type IV disease:DDR1,HLA-DQA1,HLA-DRB1,HSPA1L,LTA | hepatitis:HLA-C,HLA-DQA1…	antigen processing and presentation of exogenous peptide antigen:HLA-C,HLA-DOB,HLA-DQA1,HLA-DRA,HLA-DRB1,HLA-E,PSMB8,TAP2 | antigen processing and presentation of exogenous antigen:HLA-C,HLA-DOB,HLA-DQA1,HLA-DRA,HLA-DRB1,HLA-E,PSMB8,TAP2 | antigen processing and presentation of peptide antigen:HLA-C,HLA-DOB,HLA-DQA1,HLA-DRA,HLA-DRB1,HLA-E,PSMB8,TAP2 | adaptive immune response:HLA-C,HLA-DOB,HLA-DQ…	OHP17_all	20.5594	0.0246542	0.018282	0.018282	3549	0.110016	0.0532816	1.40958	0.424161	0.153989	0.0443027	3.29305	0.492109	0.0748755	0.0971131	0.355858	0	0.456505	0.0481977	20.5594	0	0.429327	0.054402	14.5259	0	0.486894	0.0884254	7.43723	0.206454	0.100086
rs116803551:31399558:T:C	6	31399558	6p21.33	C	T	0.997835	FALSE	rs145827824:32103749:C:G	0.422257	HCP5 (0 kb, intron/Intron/MODIFIER | nc-RNA/Non coding transcript/MODIFIER); LINC01149 (9.9 kb); MICA (16 kb); HLA-S (49 kb)	10.4	0.645 Heel bone mineral density // 0.595 Bioavailable testosterone levels // 0.585 Neurological blood protein biomarker levels // 0.554 Aspartate aminotransferase levels in low alcohol consumption // 0.517 Blood protein levels	- | ABCF1 | ABHD16A | AGER | AIF1 | APOM | ATF6B | ATP6V1G2 | ATP6V1G2-DDX39B | BAG6 | C2 | C4A | C4B | C4B_2 | C6orf10 | C6orf48 | CCHCR1 | CLIC1 | CSNK2B | DDAH2 | DDR1 | DDX39B | DHX16 | DOM3Z | DXO | EHMT2 | FLOT1 | GPANK1 | GPSM3 | GTF2H4 | HCG22 | HCG23 | HCG27 | HCG4B | HCG4P3 | HCP5 | HLA-A | HLA-B | HLA-C | HLA-DOB | HLA-DQA1 | HLA-DQA2 | HLA-DQB1 | HLA-DQB2 | HLA-DRA | HLA-DRB1 | HLA-DR…	BTN3A2 | C6orf10 | CDC42EP4 | HLA-A | HLA-DQA1 | HLA-DQA2 | HLA-DRB1 | HLA-DRB4 | HLA-DRB5 | HLA-F | HLA-H | HLA-V | IER3 | NHP2 | PARP2 | TAP2 | TMEM154 | XRCC6 | ZNRD1	Systemic lupus erythematosus:HLA-DOB,HLA-DQA1,HLA-DRA,HLA-DRB1 | Antigen processing and presentation:HLA-C,HLA-DOB,HLA-DQA1,HLA-DRA,HLA-DRB1,HLA-E,HSPA1A,HSPA1B,HSPA1L,TAP2 | Allograft rejection:HLA-C,HLA-DOB,HLA-DQA1,HLA-DRA,HLA-DRB1,HLA-E | Type I diabetes mellitus:HLA-C,HLA-DOB,HLA-DQA1,HLA-DRA,HLA-DRB1,HLA-E,LTA | Graft-versus-host disease:HLA-C,HLA-DOB,HLA-DQA1,HLA-DRA,HLA-DRB1,HLA-E | Autoi…	Translocation of ZAP-70 to Immunological synapse:HLA-DQA1,HLA-DRA,HLA-DRB1 | Interferon gamma signaling:HLA-C,HLA-DQA1,HLA-DRA,HLA-DRB1,HLA-E | Generation of second messenger molecules:HLA-DQA1,HLA-DRA,HLA-DRB1 | Phosphorylation of CD3 and TCR zeta chains:HLA-DQA1,HLA-DRA,HLA-DRB1 | PD-1 signaling:HLA-DQA1,HLA-DRA,HLA-DRB1 | Interferon Signaling:HLA-C,HLA-DQA1,HLA-DRA,HLA-DRB1,HLA-E | RNA Polymer…	Kawasaki disease:BAG6,HLA-C,HLA-DRB1,HLA-E,PRRC2A | lymphadenitis:BAG6,HLA-C,HLA-DRB1,HLA-E,PRRC2A | lymph node disease:BAG6,HLA-C,HLA-DRB1,HLA-E,PRRC2A | leprosy:HLA-DRB1,LTA,MICA | Graves' disease:HLA-C,HLA-DQA1,HLA-DRB1,TAP2 | sarcoidosis:DDR1,HLA-DQA1,HLA-DRB1,HSPA1L,LTA | hypersensitivity reaction type IV disease:DDR1,HLA-DQA1,HLA-DRB1,HSPA1L,LTA | hepatitis:HLA-C,HLA-DQA1,HLA-DRB1,HLA-E,LTA…	antigen processing and presentation of exogenous peptide antigen:HLA-C,HLA-DOB,HLA-DQA1,HLA-DRA,HLA-DRB1,HLA-E,TAP2 | antigen processing and presentation of exogenous antigen:HLA-C,HLA-DOB,HLA-DQA1,HLA-DRA,HLA-DRB1,HLA-E,TAP2 | antigen processing and presentation of peptide antigen:HLA-C,HLA-DOB,HLA-DQA1,HLA-DRA,HLA-DRB1,HLA-E,TAP2 | adaptive immune response:HLA-C,HLA-DOB,HLA-DQA1,HLA-DRA,HLA-DRB…	OHP17_all	20.4984	0.0245798	0.0150815	0.0150815	3549	0.133706	0.0576463	1.69097	0	0.214576	0.0485362	5.00759	0	0.0298955	0.102117	0.113674	0	0.497659	0.0526242	20.4984	0	0.51466	0.0592148	17.4461	0	0.461987	0.0970261	5.71743	0.205241	0.0853044
rs377749:31705183:A:C	6	31705183	6p21.33	C	A	0.998417	FALSE	rs145827824:32103749:C:G	0.524549	CLIC1 (0 kb, intron/Intron/MODIFIER | near_gene/Upstream gene/MODIFIER); MSH5 (2.5 kb, near_gene/Upstream gene/MODIFIER); MSH5-SAPCD1 (2.6 kb, near_gene/Upstream gene/MODIFIER); DDAH2 (6.8 kb); C6orf25 (11 kb); LY6G6C (16 kb); RNU6-850P (20 kb); LY6G6F (20 kb); LY6G6D (20 kb); LY6G6E (23 kb); SAPCD1 (25 kb); SAPCD1-AS1 (27 kb); VWA7 (28 kb); ABHD16A (34 kb); MIR4646 (36 kb); VARS (40 kb)	0.153	0.702 Bioavailable testosterone levels // 0.653 Aspartate aminotransferase levels in low alcohol consumption // 0.342 Neurological blood protein biomarker levels // 0.307 Heel bone mineral density	- | ABCF1 | ABHD16A | AGER | AIF1 | ATF6B | ATP6V1G2 | ATP6V1G2-DDX39B | BAG6 | C2 | C4A | C4B | C4B_2 | C6orf10 | C6orf25 | C6orf48 | CCHCR1 | CFB | CLIC1 | CSNK2B | DDAH2 | DDR1 | DDX39B | DOM3Z | DXO | EHMT2 | FLOT1 | GPANK1 | GPSM3 | GTF2H4 | HCG22 | HCG23 | HCG27 | HCP5 | HLA-A | HLA-B | HLA-C | HLA-DMB | HLA-DOA | HLA-DOB | HLA-DQA1 | HLA-DQA2 | HLA-DQB1 | HLA-DRA | HLA-DRB1 | HLA-DRB2 | HL…	BTN3A2 | HLA-DQA1 | HLA-DRB1 | HLA-DRB4 | HLA-DRB5 | HLA-F | HLA-H | HLA-V | IER3 | LIMS1 | NHP2 | PPP1R11 | TAP2 | TMEM154 | ZNRD1	Systemic lupus erythematosus:HLA-DOB,HLA-DQA1,HLA-DRA,HLA-DRB1 | Antigen processing and presentation:HLA-C,HLA-DOB,HLA-DQA1,HLA-DRA,HLA-DRB1,HLA-E,HSPA1A,HSPA1B,HSPA1L,TAP2 | Allograft rejection:HLA-C,HLA-DOB,HLA-DQA1,HLA-DRA,HLA-DRB1,HLA-E | Type I diabetes mellitus:HLA-C,HLA-DOB,HLA-DQA1,HLA-DRA,HLA-DRB1,HLA-E,LTA | Graft-versus-host disease:HLA-C,HLA-DOB,HLA-DQA1,HLA-DRA,HLA-DRB1,HLA-E | Autoi…	Translocation of ZAP-70 to Immunological synapse:HLA-DQA1,HLA-DRA,HLA-DRB1 | Interferon gamma signaling:HLA-C,HLA-DQA1,HLA-DRA,HLA-DRB1,HLA-E | Generation of second messenger molecules:HLA-DQA1,HLA-DRA,HLA-DRB1 | Phosphorylation of CD3 and TCR zeta chains:HLA-DQA1,HLA-DRA,HLA-DRB1 | PD-1 signaling:HLA-DQA1,HLA-DRA,HLA-DRB1 | Interferon Signaling:HLA-C,HLA-DQA1,HLA-DRA,HLA-DRB1,HLA-E,PSMB8 | RNA P…	Kawasaki disease:ABHD16A,BAG6,HLA-C,HLA-DRB1,HLA-E,PRRC2A | lymphadenitis:ABHD16A,BAG6,HLA-C,HLA-DRB1,HLA-E,PRRC2A | lymph node disease:ABHD16A,BAG6,HLA-C,HLA-DRB1,HLA-E,PRRC2A | leprosy:HLA-DRB1,LTA | Graves' disease:HLA-C,HLA-DQA1,HLA-DRB1,TAP2 | sarcoidosis:DDR1,HLA-DQA1,HLA-DRB1,HSPA1L,LTA | hypersensitivity reaction type IV disease:DDR1,HLA-DQA1,HLA-DRB1,HSPA1L,LTA | hepatitis:HLA-C,HLA-DQA1…	antigen processing and presentation of exogenous peptide antigen:HLA-C,HLA-DOB,HLA-DQA1,HLA-DRA,HLA-DRB1,HLA-E,PSMB8,TAP2 | antigen processing and presentation of exogenous antigen:HLA-C,HLA-DOB,HLA-DQA1,HLA-DRA,HLA-DRB1,HLA-E,PSMB8,TAP2 | antigen processing and presentation of peptide antigen:HLA-C,HLA-DOB,HLA-DQA1,HLA-DRA,HLA-DRB1,HLA-E,PSMB8,TAP2 | adaptive immune response:HLA-C,HLA-DOB,HLA-DQ…	OHP17_all	20.4884	0.0245677	0.0183229	0.0183229	3549	0.109635	0.0531846	1.406	0.419109	0.153568	0.0442206	3.2881	0.498129	0.0743697	0.097015	0.353271	0	0.454851	0.0481097	20.4884	0	0.42906	0.0543116	14.5545	0	0.48278	0.0882375	7.35147	0.266602	0.0992483
rs442391:31681289:C:T	6	31681289	6p21.33	T	C	0.997252	FALSE	rs145827824:32103749:C:G	0.524549	XXbac-BPG32J3.20 (0 kb, intron/Intron/MODIFIER); LY6G6F (0 kb, intron/Intron/MODIFIER | near_gene/Downstream gene/MODIFIER); MEGT1 (0 kb, intron/Intron/MODIFIER); LY6G6E (0 kb, intron/Intron/MODIFIER); LY6G6D (1.8 kb, near_gene/Upstream gene/MODIFIER); C6orf25 (5.1 kb); LY6G6C (5.1 kb); ABHD16A (10 kb); MIR4646 (12 kb); DDAH2 (14 kb); CLIC1 (17 kb); MSH5 (26 kb); MSH5-SAPCD1 (27 kb); LY6G5C (29 k…	1.715	0.702 Bioavailable testosterone levels // 0.653 Aspartate aminotransferase levels in low alcohol consumption // 0.342 Neurological blood protein biomarker levels // 0.307 Heel bone mineral density	- | ABCF1 | ABHD16A | AGER | AIF1 | ATF6B | ATP6V1G2 | ATP6V1G2-DDX39B | BAG6 | C2 | C4A | C4B | C4B_2 | C6orf10 | C6orf25 | C6orf48 | CCHCR1 | CFB | CLIC1 | CSNK2B | DDAH2 | DDR1 | DDX39B | DHX16 | DOM3Z | DXO | EHMT2 | FLOT1 | GPANK1 | GPSM3 | GTF2H4 | HCG22 | HCG23 | HCG27 | HCG4B | HCG4P3 | HCP5 | HLA-A | HLA-B | HLA-C | HLA-DOA | HLA-DOB | HLA-DQA1 | HLA-DQA2 | HLA-DQB1 | HLA-DRA | HLA-DRB1 …	ABP1 | BTN3A2 | GABBR1 | HLA-DQA1 | HLA-DRB1 | HLA-DRB4 | HLA-DRB5 | HLA-F | HLA-H | HLA-V | IER3 | LIMS1 | NHP2 | TAP2 | TMEM154 | ZNRD1	Systemic lupus erythematosus:HLA-DOB,HLA-DQA1,HLA-DRA,HLA-DRB1 | Antigen processing and presentation:HLA-C,HLA-DOB,HLA-DQA1,HLA-DRA,HLA-DRB1,HLA-E,HSPA1A,HSPA1B,HSPA1L,TAP2 | Allograft rejection:HLA-C,HLA-DOB,HLA-DQA1,HLA-DRA,HLA-DRB1,HLA-E | Type I diabetes mellitus:HLA-C,HLA-DOB,HLA-DQA1,HLA-DRA,HLA-DRB1,HLA-E,LTA | Graft-versus-host disease:HLA-C,HLA-DOB,HLA-DQA1,HLA-DRA,HLA-DRB1,HLA-E | Autoi…	Translocation of ZAP-70 to Immunological synapse:HLA-DQA1,HLA-DRA,HLA-DRB1 | Interferon gamma signaling:HLA-C,HLA-DQA1,HLA-DRA,HLA-DRB1,HLA-E | Generation of second messenger molecules:HLA-DQA1,HLA-DRA,HLA-DRB1 | Phosphorylation of CD3 and TCR zeta chains:HLA-DQA1,HLA-DRA,HLA-DRB1 | PD-1 signaling:HLA-DQA1,HLA-DRA,HLA-DRB1 | Interferon Signaling:HLA-C,HLA-DQA1,HLA-DRA,HLA-DRB1,HLA-E,PSMB8 | RNA P…	Kawasaki disease:ABHD16A,BAG6,HLA-C,HLA-DRB1,HLA-E,PRRC2A | lymphadenitis:ABHD16A,BAG6,HLA-C,HLA-DRB1,HLA-E,PRRC2A | lymph node disease:ABHD16A,BAG6,HLA-C,HLA-DRB1,HLA-E,PRRC2A | leprosy:HLA-DRB1,LTA | Graves' disease:HLA-C,HLA-DQA1,HLA-DRB1,TAP2 | sarcoidosis:DDR1,HLA-DQA1,HLA-DRB1,HSPA1L,LTA | hypersensitivity reaction type IV disease:DDR1,HLA-DQA1,HLA-DRB1,HSPA1L,LTA | hepatitis:HLA-C,HLA-DQA1…	antigen processing and presentation of exogenous peptide antigen:HLA-C,HLA-DOB,HLA-DQA1,HLA-DRA,HLA-DRB1,HLA-E,PSMB8,TAP2 | antigen processing and presentation of exogenous antigen:HLA-C,HLA-DOB,HLA-DQA1,HLA-DRA,HLA-DRB1,HLA-E,PSMB8,TAP2 | antigen processing and presentation of peptide antigen:HLA-C,HLA-DOB,HLA-DQA1,HLA-DRA,HLA-DRB1,HLA-E,PSMB8,TAP2 | adaptive immune response:HLA-C,HLA-DOB,HLA-DQ…	OHP17_all	20.4424	0.0245114	0.0187364	0.0187364	3549	0.109616	0.0526534	1.42763	0.32583	0.149765	0.0439718	3.18088	0.556372	0.0789342	0.0959354	0.386549	0	0.450371	0.0476919	20.4424	0	0.42866	0.0540377	14.6684	0	0.471835	0.0869877	7.23664	0.585615	0.100374
rs1639114:31219224:C:A	6	31219224	6p21.33	A	C	1	FALSE	rs145827824:32103749:C:G	0.475034	HLA-C (17 kb); USP8P1 (24 kb); RPL3P2 (29 kb); WASF5P (36 kb); HCG27 (47 kb)	3.204	0.714 Bioavailable testosterone levels // 0.664 Aspartate aminotransferase levels in low alcohol consumption // 0.53 Heel bone mineral density // 0.499 Neurological blood protein biomarker levels // 0.441 Blood protein levels // 0.36 Ocular sarcoidosis	- | ABCF1 | ABHD16A | AGER | AIF1 | APOM | ATF6B | ATP6V1G2 | ATP6V1G2-DDX39B | BAG6 | BTNL2 | C2 | C4A | C4B | C4B_2 | C6orf10 | C6orf48 | CCHCR1 | CLIC1 | CSNK2B | DDAH2 | DDR1 | DDX39B | DHX16 | DOM3Z | DXO | EHMT2 | FLOT1 | GPANK1 | GPSM3 | GTF2H4 | HCG22 | HCG23 | HCG27 | HCG4B | HCG4P3 | HCP5 | HLA-A | HLA-B | HLA-C | HLA-DOB | HLA-DQA1 | HLA-DQA2 | HLA-DQB1 | HLA-DRA | HLA-DRB1 | HLA-DRB2 …	BTN3A2 | C4A | C4B | C4B_2 | C6orf10 | DXO | HLA-DQA1 | HLA-DRB1 | HLA-DRB4 | HLA-DRB5 | HLA-F | HLA-G | HLA-H | HLA-V | IER3 | NHP2 | PARP2 | STK19 | TAP2 | TMEM154 | ZNRD1	Systemic lupus erythematosus:HLA-DOB,HLA-DQA1,HLA-DRA,HLA-DRB1 | Antigen processing and presentation:HLA-A,HLA-C,HLA-DOB,HLA-DQA1,HLA-DRA,HLA-DRB1,HLA-E,HSPA1A,HSPA1B,HSPA1L,TAP2 | Allograft rejection:HLA-A,HLA-C,HLA-DOB,HLA-DQA1,HLA-DRA,HLA-DRB1,HLA-E | Type I diabetes mellitus:HLA-A,HLA-C,HLA-DOB,HLA-DQA1,HLA-DRA,HLA-DRB1,HLA-E,LTA | Graft-versus-host disease:HLA-A,HLA-C,HLA-DOB,HLA-DQA1,HLA-DR…	Translocation of ZAP-70 to Immunological synapse:HLA-DQA1,HLA-DRA,HLA-DRB1 | Interferon gamma signaling:HLA-A,HLA-C,HLA-DQA1,HLA-DRA,HLA-DRB1,HLA-E | Generation of second messenger molecules:HLA-DQA1,HLA-DRA,HLA-DRB1 | Phosphorylation of CD3 and TCR zeta chains:HLA-DQA1,HLA-DRA,HLA-DRB1 | PD-1 signaling:HLA-DQA1,HLA-DRA,HLA-DRB1 | Interferon Signaling:HLA-A,HLA-C,HLA-DQA1,HLA-DRA,HLA-DRB1,HLA-E,P…	Kawasaki disease:BAG6,HLA-A,HLA-C,HLA-DRB1,HLA-E,PRRC2A | lymphadenitis:BAG6,HLA-A,HLA-C,HLA-DRB1,HLA-E,PRRC2A | lymph node disease:BAG6,HLA-A,HLA-C,HLA-DRB1,HLA-E,PRRC2A | leprosy:HLA-A,HLA-DRB1,LTA | Graves' disease:HLA-A,HLA-C,HLA-DQA1,HLA-DRB1,TAP2 | sarcoidosis:DDR1,HLA-DQA1,HLA-DRB1,HSPA1L,LTA | hypersensitivity reaction type IV disease:DDR1,HLA-DQA1,HLA-DRB1,HSPA1L,LTA | hepatitis:HLA-A,HL…	antigen processing and presentation of exogenous peptide antigen:HLA-A,HLA-C,HLA-DOB,HLA-DQA1,HLA-DRA,HLA-DRB1,HLA-E,PSMB8,TAP2 | antigen processing and presentation of exogenous antigen:HLA-A,HLA-C,HLA-DOB,HLA-DQA1,HLA-DRA,HLA-DRB1,HLA-E,PSMB8,TAP2 | antigen processing and presentation of peptide antigen:HLA-A,HLA-C,HLA-DOB,HLA-DQA1,HLA-DRA,HLA-DRB1,HLA-E,PSMB8,TAP2 | adaptive immune response:HL…	OHP17_all	20.4049	0.0244655	0.0143703	0.0143703	3549	0.133477	0.0594051	1.60823	0.120693	0.216608	0.0500497	4.82226	0	0.0359356	0.103719	0.13728	0	0.50669	0.0537073	20.4049	0	0.525252	0.060805	17.2437	0	0.467967	0.0981086	5.73545	0.0567259	0.09525
rs727479:51534547:C:A	15	51534547	15q21.2	A	C	0.999	TRUE	rs727479:51534547:C:A	1	RP11-108K3.1 (0 kb, intron/Intron/MODIFIER | nc-RNA/Non coding transcript/MODIFIER); CYP19A1 (0 kb, intron/Intron/MODIFIER); MIR4713 (0.086 kb, near_gene/Downstream gene/MODIFIER); GLDN (99 kb)	2.361	0.996 Waist-to-hip ratio adjusted for BMI // 0.996 Estradiol levels // 0.991 Heel bone mineral density // 0.85 Serum alkaline phosphatase levels // 0.577 Bioavailable testosterone levels	AP4E1 | CYP19A1 | DCAF13P3 | DMXL2 | GABPB1-AS1 | GLDN | GNB5 | LYSMD2 | MAPK6 | MYO5C | RP11-108K3.1 | RP11-707P17.2 | SPPL2A | TMOD2 | TRPM7 | USP8	BAZ1B	Alcoholism:GNB5 | Steroid hormone biosynthesis:CYP19A1 | Human cytomegalovirus infection:GNB5 | Human immunodeficiency virus 1 infection:GNB5 | Mitophagy - animal:USP8 | Endocytosis:USP8 | Kaposi sarcoma-associated herpesvirus infection:GNB5 | Ovarian steroidogenesis:CYP19A1 | Cushing syndrome:USP8	ESR-mediated signaling:GNB5 | TCF dependent signaling in response to WNT:USP8 | Signaling by Nuclear Receptors:GNB5 | Metabolism of steroid hormones:CYP19A1 | Signaling by WNT:GNB5,USP8 | Endogenous sterols:CYP19A1 | Metabolism of steroids:CYP19A1 | Metabolic disorders of biological oxidation enzymes:CYP19A1 | Cytochrome P450 - arranged by substrate type:CYP19A1 | Deubiquitination:USP8	endocrine system disease:CYP19A1 | hepatitis:GNB5 | hepatitis B:GNB5 | essential hypertension:CYP19A1 | male reproductive system disease:CYP19A1 | male infertility:CYP19A1 | prostate disease:CYP19A1 | sex differentiation disease:CYP19A1 | infertility:CYP19A1 | gynecomastia:CYP19A1 | breast carcinoma:CYP19A1 | prostate carcinoma:CYP19A1 | reproductive system disease:CYP19A1 | prostate cancer:CYP19…	negative regulation of immune system process:CYP19A1 | hormone biosynthetic process:CYP19A1 | hormone metabolic process:CYP19A1 | cellular hormone metabolic process:CYP19A1 | estrogen biosynthetic process:CYP19A1 | tumor necrosis factor-mediated signaling pathway:SPPL2A | calcium ion transmembrane transport:GNB5 | regulation of tumor necrosis factor-mediated signaling pathway:SPPL2A | protein K63…	TESTO_E2_men	20.3475	0.0253431	0.341026	0.658974	3413	0.0209328	0.0147804	0.804931	0	4.90374e-05	0.0122711	0.00138674	0	0.043408	0.0294053	0.85421	0.606588	0.0176868	0.0141438	0.675475	0	0.0161254	0.0155379	0.523808	0	0.0189942	0.0272401	0.313828	0	-0.00429108
rs7173595:51533736:C:T	15	51533736	15q21.2	T	C	0.999	FALSE	rs727479:51534547:C:A	0.995725	RP11-108K3.1 (0 kb, intron/Intron/MODIFIER | nc-RNA/Non coding transcript/MODIFIER); CYP19A1 (0 kb, intron/Intron/MODIFIER); MIR4713 (0.65 kb, near_gene/Upstream gene/MODIFIER); GLDN (100 kb)	1.606	1 Waist-to-hip ratio adjusted for BMI // 1 Estradiol levels // 0.996 Heel bone mineral density // 0.853 Serum alkaline phosphatase levels // 0.583 Bioavailable testosterone levels	AP4E1 | CYP19A1 | DCAF13P3 | DMXL2 | GABPB1-AS1 | GLDN | GNB5 | LYSMD2 | MAPK6 | MYO5C | RP11-108K3.1 | RP11-707P17.2 | SPPL2A | TMOD2 | TRPM7 | USP8	BAZ1B	Alcoholism:GNB5 | Steroid hormone biosynthesis:CYP19A1 | Human cytomegalovirus infection:GNB5 | Human immunodeficiency virus 1 infection:GNB5 | Mitophagy - animal:USP8 | Endocytosis:USP8 | Kaposi sarcoma-associated herpesvirus infection:GNB5 | Ovarian steroidogenesis:CYP19A1 | Cushing syndrome:USP8	ESR-mediated signaling:GNB5 | TCF dependent signaling in response to WNT:USP8 | Signaling by Nuclear Receptors:GNB5 | Metabolism of steroid hormones:CYP19A1 | Signaling by WNT:GNB5,USP8 | Endogenous sterols:CYP19A1 | Metabolism of steroids:CYP19A1 | Metabolic disorders of biological oxidation enzymes:CYP19A1 | Cytochrome P450 - arranged by substrate type:CYP19A1 | Deubiquitination:USP8	endocrine system disease:CYP19A1 | hepatitis:GNB5 | hepatitis B:GNB5 | essential hypertension:CYP19A1 | male reproductive system disease:CYP19A1 | male infertility:CYP19A1 | prostate disease:CYP19A1 | sex differentiation disease:CYP19A1 | infertility:CYP19A1 | gynecomastia:CYP19A1 | breast carcinoma:CYP19A1 | prostate carcinoma:CYP19A1 | reproductive system disease:CYP19A1 | prostate cancer:CYP19…	negative regulation of immune system process:CYP19A1 | hormone biosynthetic process:CYP19A1 | hormone metabolic process:CYP19A1 | cellular hormone metabolic process:CYP19A1 | estrogen biosynthetic process:CYP19A1 | tumor necrosis factor-mediated signaling pathway:SPPL2A | calcium ion transmembrane transport:GNB5 | regulation of tumor necrosis factor-mediated signaling pathway:SPPL2A | protein K63…	TESTO_E2_men	20.2981	0.0252806	0.341111	0.658889	3413	0.0209961	0.0147728	0.808996	0	7.14818e-05	0.0122711	0.00202331	0	0.043591	0.0293764	0.860622	0.610351	0.0175893	0.0141395	0.670594	0	0.0157102	0.0155386	0.505851	0	0.0194634	0.0272173	0.32386	0	-0.00422797
rs8024515:51532276:T:C	15	51532276	15q21.2	C	T	0.999	FALSE	rs727479:51534547:C:A	0.99145	RP11-108K3.1 (0 kb, intron/Intron/MODIFIER | nc-RNA/Non coding transcript/MODIFIER); CYP19A1 (0 kb, intron/Intron/MODIFIER); MIR4713 (2.1 kb, near_gene/Upstream gene/MODIFIER); GLDN (100 kb)	0.461	0.996 Waist-to-hip ratio adjusted for BMI // 0.996 Estradiol levels // 0.991 Heel bone mineral density // 0.849 Serum alkaline phosphatase levels // 0.588 Bioavailable testosterone levels	AP4E1 | CYP19A1 | DCAF13P3 | DMXL2 | GABPB1-AS1 | GLDN | GNB5 | LYSMD2 | MAPK6 | MYO5C | RP11-108K3.1 | RP11-707P17.2 | SPPL2A | TMOD2 | TRPM7 | USP8	BAZ1B	Alcoholism:GNB5 | Steroid hormone biosynthesis:CYP19A1 | Human cytomegalovirus infection:GNB5 | Human immunodeficiency virus 1 infection:GNB5 | Mitophagy - animal:USP8 | Endocytosis:USP8 | Kaposi sarcoma-associated herpesvirus infection:GNB5 | Ovarian steroidogenesis:CYP19A1 | Cushing syndrome:USP8	ESR-mediated signaling:GNB5 | TCF dependent signaling in response to WNT:USP8 | Signaling by Nuclear Receptors:GNB5 | Metabolism of steroid hormones:CYP19A1 | Signaling by WNT:GNB5,USP8 | Endogenous sterols:CYP19A1 | Metabolism of steroids:CYP19A1 | Metabolic disorders of biological oxidation enzymes:CYP19A1 | Cytochrome P450 - arranged by substrate type:CYP19A1 | Deubiquitination:USP8	endocrine system disease:CYP19A1 | hepatitis:GNB5 | hepatitis B:GNB5 | essential hypertension:CYP19A1 | male reproductive system disease:CYP19A1 | male infertility:CYP19A1 | prostate disease:CYP19A1 | sex differentiation disease:CYP19A1 | infertility:CYP19A1 | gynecomastia:CYP19A1 | breast carcinoma:CYP19A1 | prostate carcinoma:CYP19A1 | reproductive system disease:CYP19A1 | prostate cancer:CYP19…	negative regulation of immune system process:CYP19A1 | hormone biosynthetic process:CYP19A1 | hormone metabolic process:CYP19A1 | cellular hormone metabolic process:CYP19A1 | estrogen biosynthetic process:CYP19A1 | tumor necrosis factor-mediated signaling pathway:SPPL2A | calcium ion transmembrane transport:GNB5 | regulation of tumor necrosis factor-mediated signaling pathway:SPPL2A | protein K63…	TESTO_E2_men	20.2835	0.025262	0.34112	0.65888	3413	0.0209753	0.0147732	0.80782	0	4.60716e-05	0.0122721	0.00130266	0	0.0435768	0.0293764	0.860218	0.610555	0.0174853	0.0141404	0.665034	0	0.0155529	0.0155401	0.499057	0	0.0194605	0.0272174	0.323799	0	-0.00422134
rs41560824:31379043:A:G	6	31379043	6p21.33	G	A	0.99359	FALSE	rs145827824:32103749:C:G	0.422257	MICA (0 kb, exon/Missense/MODERATE | intron/Intron/MODIFIER); HCP5 (0 kb, intron/Intron/MODIFIER | nc-RNA/Non coding transcript/MODIFIER); HLA-S (29 kb); LINC01149 (30 kb); ZDHHC20P2 (30 kb); FGFR3P1 (33 kb); RNU6-283P (41 kb); DHFRP2 (44 kb)	0.001	0.645 Heel bone mineral density // 0.595 Bioavailable testosterone levels // 0.585 Neurological blood protein biomarker levels // 0.554 Aspartate aminotransferase levels in low alcohol consumption // 0.517 Blood protein levels	- | ABCF1 | ABHD16A | AGER | AIF1 | APOM | ATF6B | ATP6V1G2 | ATP6V1G2-DDX39B | BAG6 | C2 | C4A | C4B | C4B_2 | C6orf10 | C6orf48 | CCHCR1 | CLIC1 | CSNK2B | DDAH2 | DDR1 | DDX39B | DHX16 | DOM3Z | DXO | EHMT2 | FLOT1 | GPANK1 | GPSM3 | GTF2H4 | HCG22 | HCG23 | HCG27 | HCG4B | HCG4P3 | HCP5 | HLA-A | HLA-B | HLA-C | HLA-DOB | HLA-DQA1 | HLA-DQA2 | HLA-DQB1 | HLA-DQB2 | HLA-DRA | HLA-DRB1 | HLA-DR…	BTN3A2 | C6orf10 | CDC42EP4 | HLA-A | HLA-DQA1 | HLA-DQA2 | HLA-DRB1 | HLA-DRB4 | HLA-DRB5 | HLA-F | HLA-H | HLA-V | IER3 | NHP2 | PARP2 | TAP2 | TMEM154 | XRCC6 | ZNRD1	Systemic lupus erythematosus:HLA-DOB,HLA-DQA1,HLA-DRA,HLA-DRB1 | Antigen processing and presentation:HLA-C,HLA-DOB,HLA-DQA1,HLA-DRA,HLA-DRB1,HLA-E,HSPA1A,HSPA1B,HSPA1L,TAP2 | Allograft rejection:HLA-C,HLA-DOB,HLA-DQA1,HLA-DRA,HLA-DRB1,HLA-E | Type I diabetes mellitus:HLA-C,HLA-DOB,HLA-DQA1,HLA-DRA,HLA-DRB1,HLA-E,LTA | Graft-versus-host disease:HLA-C,HLA-DOB,HLA-DQA1,HLA-DRA,HLA-DRB1,HLA-E | Autoi…	Translocation of ZAP-70 to Immunological synapse:HLA-DQA1,HLA-DRA,HLA-DRB1 | Interferon gamma signaling:HLA-C,HLA-DQA1,HLA-DRA,HLA-DRB1,HLA-E | Generation of second messenger molecules:HLA-DQA1,HLA-DRA,HLA-DRB1 | Phosphorylation of CD3 and TCR zeta chains:HLA-DQA1,HLA-DRA,HLA-DRB1 | PD-1 signaling:HLA-DQA1,HLA-DRA,HLA-DRB1 | Interferon Signaling:HLA-C,HLA-DQA1,HLA-DRA,HLA-DRB1,HLA-E | RNA Polymer…	Kawasaki disease:BAG6,HLA-C,HLA-DRB1,HLA-E,PRRC2A | lymphadenitis:BAG6,HLA-C,HLA-DRB1,HLA-E,PRRC2A | lymph node disease:BAG6,HLA-C,HLA-DRB1,HLA-E,PRRC2A | leprosy:HLA-DRB1,LTA,MICA | Graves' disease:HLA-C,HLA-DQA1,HLA-DRB1,TAP2 | sarcoidosis:DDR1,HLA-DQA1,HLA-DRB1,HSPA1L,LTA | hypersensitivity reaction type IV disease:DDR1,HLA-DQA1,HLA-DRB1,HSPA1L,LTA | hepatitis:HLA-C,HLA-DQA1,HLA-DRB1,HLA-E,LTA…	antigen processing and presentation of exogenous peptide antigen:HLA-C,HLA-DOB,HLA-DQA1,HLA-DRA,HLA-DRB1,HLA-E,TAP2 | antigen processing and presentation of exogenous antigen:HLA-C,HLA-DOB,HLA-DQA1,HLA-DRA,HLA-DRB1,HLA-E,TAP2 | antigen processing and presentation of peptide antigen:HLA-C,HLA-DOB,HLA-DQA1,HLA-DRA,HLA-DRB1,HLA-E,TAP2 | adaptive immune response:HLA-C,HLA-DOB,HLA-DQA1,HLA-DRA,HLA-DRB…	OHP17_all	20.2274	0.0242487	0.0154146	0.0154146	3549	0.13509	0.0568199	1.7587	0	0.205271	0.0474877	4.81195	0	0.0453151	0.102559	0.181376	0	0.4907	0.0522502	20.2274	0	0.495177	0.058117	16.7984	0	0.473913	0.0980383	5.8745	0.144802	0.085653
rs2414097:51529835:G:A	15	51529835	15q21.2	A	G	1	FALSE	rs727479:51534547:C:A	0.987098	RP11-108K3.1 (0 kb, intron/Intron/MODIFIER | nc-RNA/Non coding transcript/MODIFIER); CYP19A1 (0 kb, intron/Intron/MODIFIER); MIR4713 (4.6 kb, near_gene/Upstream gene/MODIFIER); GLDN (100 kb)	11.15	0.991 Waist-to-hip ratio adjusted for BMI // 0.991 Estradiol levels // 0.987 Heel bone mineral density // 0.853 Serum alkaline phosphatase levels // 0.589 Bioavailable testosterone levels	AP4E1 | CYP19A1 | DCAF13P3 | DMXL2 | GABPB1-AS1 | GLDN | GNB5 | LYSMD2 | MAPK6 | MYO5C | RP11-108K3.1 | RP11-707P17.2 | SPPL2A | TMOD2 | TRPM7 | USP8	BAZ1B	Alcoholism:GNB5 | Steroid hormone biosynthesis:CYP19A1 | Human cytomegalovirus infection:GNB5 | Human immunodeficiency virus 1 infection:GNB5 | Mitophagy - animal:USP8 | Endocytosis:USP8 | Kaposi sarcoma-associated herpesvirus infection:GNB5 | Ovarian steroidogenesis:CYP19A1 | Cushing syndrome:USP8	ESR-mediated signaling:GNB5 | TCF dependent signaling in response to WNT:USP8 | Signaling by Nuclear Receptors:GNB5 | Metabolism of steroid hormones:CYP19A1 | Signaling by WNT:GNB5,USP8 | Endogenous sterols:CYP19A1 | Metabolism of steroids:CYP19A1 | Metabolic disorders of biological oxidation enzymes:CYP19A1 | Cytochrome P450 - arranged by substrate type:CYP19A1 | Deubiquitination:USP8	endocrine system disease:CYP19A1 | hepatitis:GNB5 | hepatitis B:GNB5 | essential hypertension:CYP19A1 | male reproductive system disease:CYP19A1 | male infertility:CYP19A1 | prostate disease:CYP19A1 | sex differentiation disease:CYP19A1 | infertility:CYP19A1 | gynecomastia:CYP19A1 | breast carcinoma:CYP19A1 | prostate carcinoma:CYP19A1 | reproductive system disease:CYP19A1 | prostate cancer:CYP19…	negative regulation of immune system process:CYP19A1 | hormone biosynthetic process:CYP19A1 | hormone metabolic process:CYP19A1 | cellular hormone metabolic process:CYP19A1 | estrogen biosynthetic process:CYP19A1 | tumor necrosis factor-mediated signaling pathway:SPPL2A | calcium ion transmembrane transport:GNB5 | regulation of tumor necrosis factor-mediated signaling pathway:SPPL2A | protein K63…	TESTO_E2_men	20.2001	0.0251561	0.341278	0.658722	3413	0.0207312	0.01477	0.794698	0	-0.000171773	0.0122726	0.00487705	0	0.0436439	0.0293687	0.862453	0.615171	0.0163703	0.0141406	0.60731	0	0.0142119	0.0155426	0.443073	0	0.0189207	0.0272124	0.312714	0	-0.00437869
[truncated: 1,925 more rows]
[truncated: 35 more columns]

## Sheet: S2
Table S2: Nearby genes of the genome-wide significant loci.
markername	chr	position	snptype	distance	formateddist	genename	description	entrez	ensg	genes_chr	gene_start_bp	gene_end_bp	strand	band	genes_biotype
rs112174050:51581471:C:T	1	51581471	SNV	0	0 kb	C1orf185	chromosome 1 open reading frame 185	284546	ENSG00000204006	1	51567906	51613752	1	p32.3	protein_coding
rs112174050:51581471:C:T	1	51581471	NA	41988	42 kb	CFL1P2	cofilin 1 (non-muscle) pseudogene 2	NA	ENSG00000213478	1	51623460	51624143	-	p32.3	pseudogene
rs112174050:51581471:C:T	1	51581471	NA	55893	56 kb	MIR4421	microRNA 4421	100616189	ENSG00000265538	1	51525509	51525577	+	p32.3	miRNA
rs112174050:51581471:C:T	1	51581471	NA	120471	120 kb	RNF11	ring finger protein 11	26994	ENSG00000123091	1	51701943	51739127	+	p32.3	protein_coding
rs112174050:51581471:C:T	1	51581471	NA	141165	140 kb	CDKN2C	cyclin-dependent kinase inhibitor 2C (p18, inhibits CDK4)	1031	ENSG00000123080	1	51426417	51440305	+	p32.3	protein_coding
rs112174050:51581471:C:T	1	51581471	NA	155535	160 kb	FAF1	Fas (TNFRSF6) associated factor 1	11124	ENSG00000185104	1	50905150	51425935	-	p32.3	protein_coding
rs112174050:51581471:C:T	1	51581471	NA	171458	170 kb	TTC39A	tetratricopeptide repeat domain 39A	22996	ENSG00000085831	1	51752930	51810788	-	p32.3	protein_coding
rs112174050:51581471:C:T	1	51581471	NA	238463	240 kb	EPS15	epidermal growth factor receptor pathway substrate 15	2060	ENSG00000085832	1	51819935	51985000	-	p32.3	protein_coding
rs6428792:119656867:G:A	1	119656867	SNV	0	0 kb	WARS2	tryptophanyl tRNA synthetase 2, mitochondrial	10352	ENSG00000116874	1	119573839	119683294	-1	p12	protein_coding
rs6428792:119656867:G:A	1	119656867	NA	12294	12 kb	RPS3AP12	ribosomal protein S3a pseudogene 12	NA	ENSG00000236804	1	119669162	119669914	-	p12	pseudogene
rs6428792:119656867:G:A	1	119656867	NA	28289	28 kb	RBMX2P3	RNA binding motif protein, X-linked 2 pseudogene 3	NA	ENSG00000223575	1	119627621	119628577	-	p12	pseudogene
rs6428792:119656867:G:A	1	119656867	NA	49458	49 kb	WARS2-IT1	WARS2 intronic transcript 1 (non-protein coding)	NA	ENSG00000224238	1	119590028	119607408	+	p12	antisense
rs6428792:119656867:G:A	1	119656867	NA	105069	110 kb	RPL6P2	ribosomal protein L6 pseudogene 2	NA	ENSG00000227056	1	119761937	119762719	-	p12	pseudogene
rs6428792:119656867:G:A	1	119656867	NA	124687	120 kb	TBX15	T-box 15	6913	ENSG00000092607	1	119425669	119532179	-	p12	protein_coding
rs6428792:119656867:G:A	1	119656867	NA	217152	220 kb	RNU1-75P	RNA, U1 small nuclear 75, pseudogene	NA	ENSG00000194297	1	119874020	119874148	-	p12	snRNA
rs947130:120016732:T:C	1	120016732	SNV	306	0.31 kb	HSD3BP1	hydroxy-delta-5-steroid dehydrogenase, 3 beta, pseudogene 1	NA	ENSG00000187481	1	120009844	120016426	1	p12	pseudogene
[truncated: 573 more rows]

## Sheet: S3
Table S3: eQTL lookup for the genome-wide significant SNPs.
[truncated: 15,901 more rows]

## Sheet: S4
Table S4: GWAS Catalog lookup for the genome-wide significant SNPs.
[truncated: 151 more rows]

## Sheet: S5
Table S5: Lead SNPs of all significant loci and sex-interaction results.
[truncated: 22 more rows]

[truncated: 5 more sheets: S6, S7, S8, S9, S10]
